# Supplementary material for: Fungicide-inspired precursors of π-allylpalladium intermediates for palladium-catalyzed decarboxylative cycloadditions
Source: Royal Society of Chemistry journal article supplement (doi:10.1039/d3sc00112a), 2023-01-01
Supplement: d3sc00112a1.pdf [file d3sc00112a1.pdf]

Electronic Supplementary Information

**A fungicide-inspired precursors of  $\pi$ -allylpalladium  
intermediates for palladium-catalyzed  
decarboxylative cycloadditions**

**CONTENTS**

|                                                                                            |      |
|--------------------------------------------------------------------------------------------|------|
| General Information                                                                        | S2   |
| Preparation of Substrates: Synthesis of 5-Vinyloxazolidine-2,4-diones <b>1</b> or <b>4</b> | S2   |
| General Procedure for Palladium-Catalyzed Asymmetric (5 + 3) Cycloaddition                 | S3   |
| General Procedure for Scaled-up (5 + 3) Cycloaddition                                      | S3   |
| General Procedure for Palladium-Catalyzed Asymmetric (3 + 2) Cycloaddition                 | S3   |
| General Procedure for Scaled-up (3 + 2) Cycloaddition                                      | S3   |
| General Procedure for Further Transformation                                               | S4   |
| Characterization Data of Substrates and Products                                           | S4   |
| NMR Spectra of Substrates and Products                                                     | S38  |
| HPLC Chromatograms of All Products                                                         | S115 |
| X-Ray Crystallographic Data of <b>3ea</b> , <b>6aa</b> and <b>7</b>                        | S160 |

## General Information

All reactions were performed in Schlenk tubes under an atmosphere of argon using oven-dried glassware. Commercially obtained reagents were used without further purification, unless otherwise noted. Trichloromethane (CHCl<sub>3</sub>) was distilled over P<sub>2</sub>O<sub>5</sub> and stored over 3Å type molecular sieves. Tetrahydrofuran (THF) and toluene were distilled freshly before use over sodium and benzophenone. Acetonitrile (MeCN), Dichloromethane (DCM) and 1,2-dichloroethane (DCE) were distilled from CaH<sub>2</sub>. Reactions were checked for completion by TLC analysis and plates were visualized with short-wave UV light (254 nm). The <sup>1</sup>H, <sup>13</sup>C and <sup>19</sup>F NMR spectra were obtained in CDCl<sub>3</sub> using a Bruker-BioSpin AVANCE III HD NMR spectrometer at 500, 125 and 470 MHz, respectively. Chemical shifts are reported in parts per million (δ value) calibrated against the residual solvent peak. Signal patterns are indicated as follows: s, singlet; d, doublet; t, triplet; q, quartet; m, multiplet. Coupling constants (*J*) are given in hertz (Hz). The infrared spectra were recorded on a Bruker VERTEX 70 IR spectrometer as KBr pellets, with absorption reported in cm<sup>-1</sup>. High-resolution mass spectra were recorded on a Bruker Impact II UHR TOF LC/MS Mass Spectrometry. Melting points were determined on a Stuard SMP3 melting point apparatus. X-ray crystallographic data were collected using a MM007HF Saturn724+. HPLC analysis was performed on Agilent 1220 series, UV detection monitored at 254 nm, using a Chiralpak AD-H column, a Chiralcel OD-H column, Chiralpak IA column, Chiralpak IC column, Chiralpak ID column and Chiralpak IH column with hexane and *i*-PrOH as the eluent.

## Preparation of Substrates: Synthesis of 5-Vinylloxazolidine-2,4-diones **1** or **4**

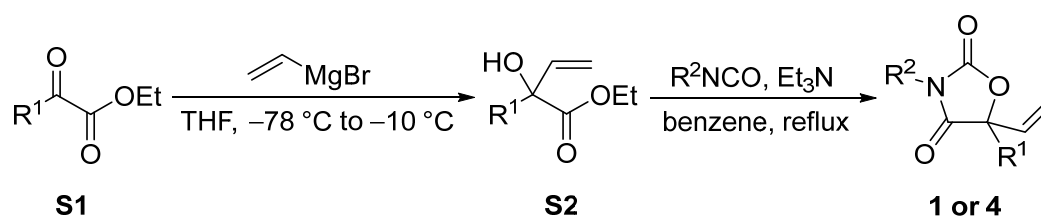

The required Grignard reagent (1.2 equiv.) was added dropwise to a solution of the ethyl acrylate **S1** (1.0 equiv.) in anhydrous THF at -78 °C under argon atmosphere. The resulting mixture was stirred at -78 °C for 2 h. Then the resulting mixture was stirred at -10 °C for 2 h. The reaction was quenched with aq. NH<sub>4</sub>Cl and the organic layer was separated. The aqueous layer was extracted with EtOAc (3×100 mL). The combined organic layers were washed with brine (1×100 mL), dried over MgSO<sub>4</sub>, and concentrated under reduced pressure. The residue was purified by flash chromatography on silica gel (Ethyl acetate/Petroleum ether = 1:15) to obtain the product **S2**.

A solution of **S2** (5.0 mmol, 1.0 equiv.), phenyl isocyanate (2.0 equiv.) and Et<sub>3</sub>N (5.0 equiv.) in benzene was stirred at 80 °C for 12 h. The reaction was concentrated under reduced pressure. The residue was purified by flash chromatography on silica gel (Ethyl acetate/Petroleum ether = 1:10) to give the desired 5-vinyloxazolidine-2,4-diones **1** or **4**.

#### **General Procedure for Palladium-Catalyzed Asymmetric (5 + 3) Cycloaddition**

To an oven-dried 25 mL of Schlenk tube equipped with a stir bar, Pd<sub>2</sub>dba<sub>3</sub>·CHCl<sub>3</sub> (5 mol%) and (S, S, S)-(3, 5-dioxa-4-phosphacyclohepta[2, 1-a:3, 4-a']dinaphthalen-4-yl)bis(1-phenylethyl)amine **L3** (20 mol%) was added along with 5-vinyloxazolidine-2,4-diones **1** (0.12 mmol), azomethine imines **2** (0.1 mmol) and DCM (1.0 mL). The reaction was stirred at 25 °C under argon atmosphere until complete consumption of azomethine imines **2** as monitored by thin layer chromatography. The reaction mixture was directly purified by silica gel column chromatography (Ethyl acetate/Petroleum ether = 1:1) to afford the desired cycloadducts.

#### **General Procedure for Scaled-up (5 + 3) Cycloaddition**

To an oven-dried 100 mL of Schlenk tube equipped with a stir bar, Pd<sub>2</sub>dba<sub>3</sub>·CHCl<sub>3</sub> (5 mol%) and (S, S, S)-(3, 5-dioxa-4-phosphacyclohepta[2,1-a:3,4-a']dinaphthalen-4-yl)bis(1-phenylethyl)amine (20 mol%) was added along with 5-vinyloxazolidine-2,4-diones **1** (1.2 mmol), azomethine imines **2** (1.0 mmol) and DCM (10.0 mL). The reaction was stirred at 25 °C under argon atmosphere until complete consumption of azomethine imines **2** as monitored by thin layer chromatography. The reaction mixture was directly purified by silica gel column chromatography (Ethyl acetate/Petroleum ether = 1:1) to afford the desired cycloadducts.

#### **General Procedure for Palladium-Catalyzed Asymmetric (3 + 2) Cycloaddition**

To an oven-dried 25 mL of Schlenk tube equipped with a stir bar, Pd<sub>2</sub>dba<sub>3</sub>·CHCl<sub>3</sub> (2.5 mol%) and (S, S, S)-(3, 5-dioxa-4-phosphacyclohepta[2,1-a:3,4-a']dinaphthalen-4-yl)bis(1-phenylethyl)amine **L3** (10 mol%) was added along with 5-vinyloxazolidine-2,4-diones **4** (0.15 mmol), 1,1-dicyanoalkenes **5** (0.1 mmol) and DCM (1.0 mL). The reaction was stirred at 0 °C under argon atmosphere until complete consumption of 1,1-dicyanoalkenes **5** as monitored by thin layer chromatography. The reaction mixture was directly purified by silica gel column chromatography (Ethyl acetate/Petroleum ether = 10:1) to afford the desired cycloadducts.

#### **General Procedure for Scaled-up (3 + 2) Cycloaddition**

To an oven-dried 100 mL of Schlenk tube equipped with a stir bar, Pd<sub>2</sub>dba<sub>3</sub>·CHCl<sub>3</sub> (2.5 mol%) and (S, S, S)-(3, 5-dioxa-4-phosphacyclohepta[2,1-a:3,4-a']dinaphthalen-4-yl)bis(1-phenylethyl)amine (10 mol%) was added along with 5-vinyloxazolidine-2,4-diones **4** (1.5 mmol), 1,1-dicyanoalkenes **5** (1.0 mmol) and DCM (10.0 mL). The reaction was stirred at 0 °C

under argon atmosphere until complete consumption of 1,1-dicyanoalkenes **5** as monitored by thin layer chromatography. The reaction mixture was directly purified by silica gel column chromatography (Ethyl acetate/Petroleum ether = 10:1) to afford desired the cycloadducts.

#### General Procedure for Further Transformation

The NaBH<sub>4</sub> (2.0 mmol) was added to a solution of **6aa** (0.20 mmol) in DCM/MeOH (1:1, 4.0 mL) at 0 °C. The reaction was stirred at 0 °C for 12 h, and the reaction was concentrated under reduced pressure. The residue purified by silica gel column chromatography (Ethyl acetate/Petroleum ether = 1:1) to afford the desired product **7**.

#### Characterization Data of Substrates and Products

##### 3,5-diphenyl-5-vinyloxazolidine-2,4-dione

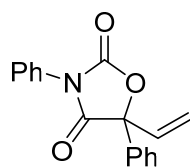

**1a**

white solid, 499.7 mg, 36%, Mp: 98 – 100 °C. <sup>1</sup>H NMR (500 MHz, CDCl<sub>3</sub>): δ = 7.58 – 7.47 (m, 2H), 7.42 – 7.22 (m, 8H), 6.23 – 6.11 (dd, *J* = 17.0, 10.5 Hz, 1H), 5.65 – 5.56 (d, *J* = 17.0 Hz, 1H), 5.43 – 5.34 (d, *J* = 10.5 Hz, 1H). <sup>13</sup>C NMR (CDCl<sub>3</sub>, 125 MHz): δ = 170.7, 153.1, 134.9, 133.4, 130.8, 129.5, 129.4, 129.1, 125.7, 125.5, 118.4, 87.3. HRMS (ESI, *m/z*) calcd for C<sub>17</sub>H<sub>14</sub>NO<sub>3</sub> [M+H]<sup>+</sup>: 280.0968, found: 280.0968.

##### 3-(3-fluorophenyl)-5-phenyl-5-vinyloxazolidine-2,4-dione

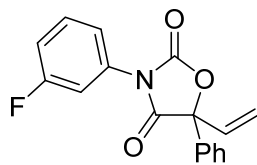

**1b**

white solid, 808.7 mg, 54%, Mp: 78 – 80 °C. <sup>1</sup>H NMR (500 MHz, CDCl<sub>3</sub>): δ = 7.70 – 7.57 (m, 2H), 7.52 – 7.36 (m, 4H), 7.32 – 7.19 (m, 2H), 7.16 – 7.05 (m, 1H), 6.34 – 6.19 (dd, *J* = 17.0, 10.5 Hz, 1H), 5.76 – 5.65 (d, *J* = 17.0 Hz, 1H), 5.56 – 5.45 (d, *J* = 10.5 Hz, 1H). <sup>13</sup>C NMR (CDCl<sub>3</sub>, 125 MHz): δ = 170.3, 162.6 (d, *J* = 246.6 Hz), 152.5, 134.6, 133.1, 132.1 (d, *J* = 10.1 Hz), 130.6 (d, *J* = 8.8 Hz), 129.6, 129.1, 125.4, 121.1 (d, *J* = 3.4 Hz), 118.5, 116.1 (d, *J* = 20.9 Hz), 113.2 (d, *J* = 24.9 Hz), 87.3. <sup>19</sup>F NMR (CDCl<sub>3</sub>, 470 MHz): δ = -110.2. HRMS (ESI, *m/z*) calcd for C<sub>17</sub>H<sub>13</sub>FNO<sub>3</sub> [M+H]<sup>+</sup>: 298.0874, found: 298.0873.

### 3-(4-fluorophenyl)-5-phenyl-5-vinyloxazolidine-2,4-dione

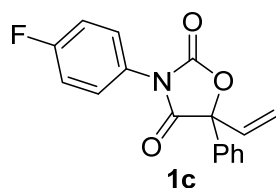

white solid, 992.8 mg, 67%, Mp: 108 – 110 °C. <sup>1</sup>H NMR (500 MHz, CDCl<sub>3</sub>): δ = 7.71 – 7.55 (m, 2H), 7.52 – 7.29 (m, 5H), 7.19 – 7.03 (m, 2H), 6.36 – 6.17 (dd, *J* = 17.0, 10.5 Hz, 1H), 5.78 – 5.62 (d, *J* = 17.0 Hz, 1H), 5.57 – 5.43 (d, *J* = 10.5 Hz, 1H). <sup>13</sup>C NMR (CDCl<sub>3</sub>, 125 MHz): δ = 170.6, 162.4 (d, *J* = 248.1 Hz), 152.9, 134.7, 133.3, 129.6, 129.1, 127.7 (d, *J* = 8.6 Hz), 126.7 (d, *J* = 3.3 Hz), 125.4, 118.5, 116.4 (d, *J* = 23.0 Hz), 87.4. <sup>19</sup>F NMR (CDCl<sub>3</sub>, 470 MHz): δ = –111.3. HRMS (ESI, *m/z*) calcd for C<sub>17</sub>H<sub>13</sub>FNO<sub>3</sub> [M+H]<sup>+</sup>: 298.0874, found: 298.0871.

### 3-(3-chlorophenyl)-5-phenyl-5-vinyloxazolidine-2,4-dione

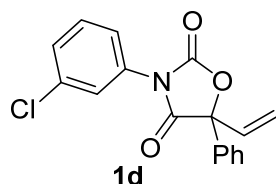

yellow oil, 869.6 mg, 55%. <sup>1</sup>H NMR (500 MHz, CDCl<sub>3</sub>): δ = 7.65 – 7.57 (m, 2H), 7.51 – 7.33 (m, 7H), 6.31 – 6.21 (dd, *J* = 17.0, 10.5 Hz, 1H), 5.77 – 5.65 (d, *J* = 17.0 Hz, 1H), 5.57 – 5.47 (d, *J* = 10.5 Hz, 1H). <sup>13</sup>C NMR (CDCl<sub>3</sub>, 125 MHz): δ = 170.3, 152.5, 135.0, 134.6, 133.1, 131.9, 130.3, 129.6, 129.2, 129.1, 125.8, 125.4, 123.7, 118.5, 87.4. HRMS (ESI, *m/z*) calcd for C<sub>17</sub>H<sub>13</sub><sup>35</sup>ClNO<sub>3</sub> [M+H]<sup>+</sup>: 314.0578, found: 314.0578.

### 3-(4-chlorophenyl)-5-phenyl-5-vinyloxazolidine-2,4-dione

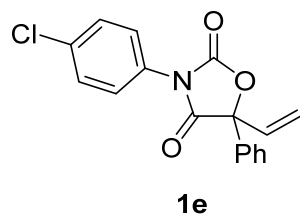

white solid, 753.4 mg, 48%, Mp: 82 – 84 °C. <sup>1</sup>H NMR (500 MHz, CDCl<sub>3</sub>): δ = 7.67 – 7.56 (m, 2H), 7.52 – 7.34 (m, 7H), 6.34 – 6.17 (dd, *J* = 17.5, 11.0 Hz, 1H), 5.77 – 5.65 (d, *J* = 17.5 Hz, 1H), 5.57 – 5.43 (d, *J* = 11.0 Hz, 1H). <sup>13</sup>C NMR (CDCl<sub>3</sub>, 125 MHz): δ = 170.4, 152.7, 134.8, 134.6, 133.2, 129.6, 129.6, 129.3, 129.1, 126.8, 125.4, 118.5, 87.4. HRMS (ESI, *m/z*) calcd for C<sub>17</sub>H<sub>13</sub><sup>35</sup>ClNO<sub>3</sub> [M+H]<sup>+</sup>: 314.0578, found: 314.0580.

### 3-(4-bromophenyl)-5-phenyl-5-vinyloxazolidine-2,4-dione

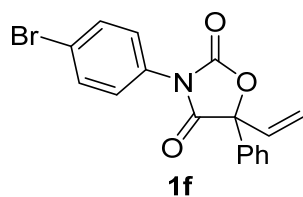

white solid, 768.8 mg, 43%, Mp: 88 – 90 °C. <sup>1</sup>H NMR (500 MHz, CDCl<sub>3</sub>): δ = 7.67 – 7.56 (m, 4H), 7.50 – 7.39 (m, 3H), 7.38 – 7.29 (m, 2H), 6.33 – 6.20 (dd, *J* = 17.0, 10.5 Hz, 1H), 5.76 – 5.64 (d, *J* = 17.0 Hz, 1H), 5.55 – 5.45 (d, *J* = 10.5 Hz, 1H). <sup>13</sup>C NMR (CDCl<sub>3</sub>, 125 MHz): δ = 170.4, 152.6, 134.6, 133.2, 132.5, 129.9, 129.6, 129.1, 127.1, 125.4, 122.9, 118.5, 87.4. HRMS (ESI, *m/z*) calcd for C<sub>17</sub>H<sub>13</sub><sup>79</sup>BrNO<sub>3</sub> [M+H]<sup>+</sup>: 358.0073, found: 358.0074.

### 5-phenyl-3-(4-(trifluoromethyl)phenyl)-5-vinyloxazolidine-2,4-dione

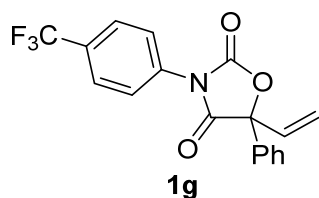

yellow oil, 979.8 mg, 56%. <sup>1</sup>H NMR (500 MHz, CDCl<sub>3</sub>): δ = 7.78 – 7.70 (m, 2H), 7.67 – 7.57 (m, 4H), 7.50 – 7.36 (m, 3H), 6.33 – 6.19 (dd, *J* = 17.5, 11.0 Hz, 1H), 5.78 – 5.66 (d, *J* = 17.5 Hz, 1H), 5.59 – 5.43 (d, *J* = 11.0 Hz, 1H). <sup>13</sup>C NMR (CDCl<sub>3</sub>, 125 MHz): δ = 170.3, 152.4, 134.5, 134.0, 133.1, 130.9 (q, *J* = 32.9 Hz), 129.7, 129.1, 126.5 (q, *J* = 3.6 Hz), 125.7, 125.4, 123.6 (q, *J* = 270.8 Hz), 118.6, 87.4. <sup>19</sup>F NMR (CDCl<sub>3</sub>, 470 MHz): δ = –62.8. HRMS (ESI, *m/z*) calcd for C<sub>18</sub>H<sub>13</sub>F<sub>3</sub>NO<sub>3</sub> [M+H]<sup>+</sup>: 348.0842, found: 348.0837.

### 5-phenyl-3-(*m*-tolyl)-5-vinyloxazolidine-2,4-dione

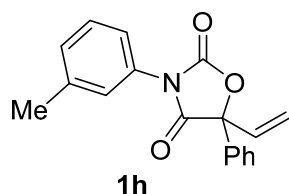

yellow oil, 988.3 mg, 67%. <sup>1</sup>H NMR (500 MHz, CDCl<sub>3</sub>): δ = 7.68 – 7.56 (m, 2H), 7.48 – 7.37 (m, 3H), 7.36 – 7.29 (m, 1H), 7.24 – 7.14 (m, 3H), 6.33 – 6.20 (dd, *J* = 17.0, 10.5 Hz, 1H), 5.76 – 5.67 (d, *J* = 17.0 Hz, 1H), 5.52 – 5.42 (d, *J* = 10.5 Hz, 1H), 2.37 (s, 3H). <sup>13</sup>C NMR (CDCl<sub>3</sub>, 125 MHz): δ = 170.8, 153.2, 139.6, 134.9, 133.4, 130.7, 130.0, 129.5, 129.2, 129.0, 129.0, 126.4, 125.4, 122.9, 118.3, 87.3, 21.3. HRMS (ESI, *m/z*) calcd for C<sub>18</sub>H<sub>16</sub>NO<sub>3</sub> [M+H]<sup>+</sup>: 294.1125, found: 294.1120.

### 5-phenyl-3-(p-tolyl)-5-vinyloxazolidine-2,4-dione

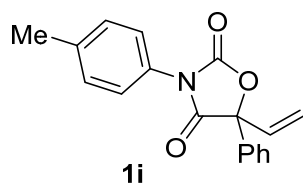

white solid, 788.3 mg, 54%, Mp: 92 – 94 °C.  $^1\text{H}$  NMR (500 MHz,  $\text{CDCl}_3$ ):  $\delta$  = 7.60 – 7.47 (m, 2H), 7.40 – 7.24 (m, 3H), 7.21 – 7.12 (m, 4H), 6.27 – 6.09 (dd,  $J$  = 17.5, 11.0 Hz, 1H), 5.66 – 5.55 (d,  $J$  = 17.5 Hz, 1H), 5.45 – 5.32 (d,  $J$  = 11.0 Hz, 1H), 2.27 (s, 3H).  $^{13}\text{C}$  NMR ( $\text{CDCl}_3$ , 125 MHz):  $\delta$  = 169.7, 152.1, 138.1, 133.8, 132.3, 128.9, 128.4, 127.9, 127.1, 124.5, 124.4, 117.2, 86.2, 20.1. HRMS (ESI,  $m/z$ ) calcd for  $\text{C}_{18}\text{H}_{16}\text{NO}_3$   $[\text{M}+\text{H}]^+$ : 294.1125, found: 294.1120.

### 3-(3,5-dimethylphenyl)-5-phenyl-5-vinyloxazolidine-2,4-dione

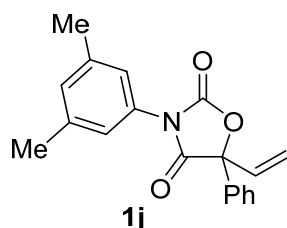

yellow oil, 998.1 mg, 65%.  $^1\text{H}$  NMR (500 MHz,  $\text{CDCl}_3$ ):  $\delta$  = 7.67 – 7.59 (m, 2H), 7.49 – 7.36 (m, 3H), 7.08 – 7.01 (m, 1H), 7.01 – 6.94 (d,  $J$  = 1.5 Hz, 2H), 6.33 – 6.22 (dd,  $J$  = 17.0, 10.5 Hz, 1H), 5.76 – 5.66 (d,  $J$  = 17.0 Hz, 1H), 5.56 – 5.44 (d,  $J$  = 10.5 Hz, 1H), 2.34 (s, 6H).  $^{13}\text{C}$  NMR ( $\text{CDCl}_3$ , 125 MHz):  $\delta$  = 170.9, 153.3, 139.3, 134.9, 133.4, 131.0, 130.4, 129.5, 129.0, 125.4, 123.6, 118.3, 87.3, 21.2. HRMS (ESI,  $m/z$ ) calcd for  $\text{C}_{19}\text{H}_{18}\text{NO}_3$   $[\text{M}+\text{H}]^+$ : 308.1281, found: 308.1277.

### 3-(3-methoxyphenyl)-5-phenyl-5-vinyloxazolidine-2,4-dione

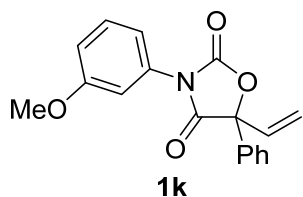

yellow oil, 810.2 mg, 52%.  $^1\text{H}$  NMR (500 MHz,  $\text{CDCl}_3$ ):  $\delta$  = 7.71 – 7.58 (m, 2H), 7.50 – 7.32 (m, 4H), 7.03 – 6.98 (m, 1H), 6.98 – 6.91 (m, 2H), 6.35 – 6.22 (dd,  $J$  = 17.0, 10.5 Hz, 1H), 5.78 – 5.67 (d,  $J$  = 17.0 Hz, 1H), 5.55 – 5.46 (d,  $J$  = 10.5 Hz, 1H), 3.80 (s, 3H).  $^{13}\text{C}$  NMR ( $\text{CDCl}_3$ , 125 MHz):  $\delta$  = 170.6, 160.2, 153.0, 134.8, 133.3, 131.7, 130.1, 129.5, 129.0, 125.4, 118.4, 117.9, 115.0, 111.5, 87.2, 55.6. HRMS (ESI,  $m/z$ ) calcd for  $\text{C}_{18}\text{H}_{16}\text{NO}_4$   $[\text{M}+\text{H}]^+$ : 310.1074, found: 310.1072.

### 3-(4-methoxyphenyl)-5-phenyl-5-vinyloxazolidine-2,4-dione

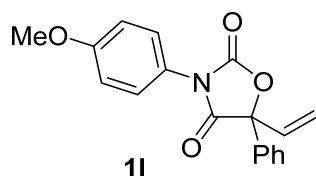

white solid, 977.8 mg, 63%, Mp: 93 – 95 °C.  $^1\text{H}$  NMR (500 MHz,  $\text{CDCl}_3$ ):  $\delta$  = 7.69 – 7.57 (m, 2H), 7.49 – 7.37 (m, 3H), 7.34 – 7.27 (m, 2H), 7.02 – 6.91 (m, 2H), 6.33 – 6.20 (dd,  $J$  = 17.5, 11.0 Hz, 1H), 5.77 – 5.63 (d,  $J$  = 17.5 Hz, 1H), 5.55 – 5.45 (d,  $J$  = 11.0 Hz, 1H), 3.81 (s, 3H).  $^{13}\text{C}$  NMR ( $\text{CDCl}_3$ , 125 MHz):  $\delta$  = 170.9, 159.9, 153.4, 134.9, 133.4, 129.5, 129.0, 127.2, 125.4, 123.3, 118.3, 114.7, 87.3, 55.6. HRMS (ESI,  $m/z$ ) calcd for  $\text{C}_{18}\text{H}_{16}\text{NO}_4$   $[\text{M}+\text{H}]^+$ : 310.1074, found: 310.1071.

### 5-phenyl-3-(4-(trifluoromethoxy)phenyl)-5-vinyloxazolidine-2,4-dione

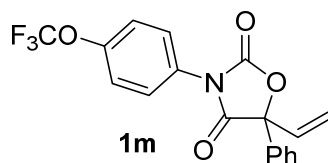

yellow oil, 978.4 mg, 54%.  $^1\text{H}$  NMR (500 MHz,  $\text{CDCl}_3$ ):  $\delta$  = 7.68 – 7.58 (m, 2H), 7.56 – 7.48 (m, 2H), 7.48 – 7.39 (m, 3H), 7.36 – 7.27 (m, 2H), 6.33 – 6.22 (dd,  $J$  = 17.0, 11.0 Hz, 1H), 5.78 – 5.65 (d,  $J$  = 17.0 Hz, 1H), 5.55 – 5.49 (d,  $J$  = 11.0 Hz, 1H).  $^{13}\text{C}$  NMR ( $\text{CDCl}_3$ , 125 MHz):  $\delta$  = 170.4, 152.7, 149.0, 134.6, 133.1, 129.6, 129.2, 129.1, 127.1, 125.4, 121.8, 120.4 (q,  $J$  = 256.8 Hz), 118.5, 87.4.  $^{19}\text{F}$  NMR ( $\text{CDCl}_3$ , 470 MHz):  $\delta$  = -57.9. HRMS (ESI,  $m/z$ ) calcd for  $\text{C}_{18}\text{H}_{13}\text{F}_3\text{NO}_4$   $[\text{M}+\text{H}]^+$ : 364.0791, found: 364.0785.

### 5-(2-fluorophenyl)-3-(3-methoxyphenyl)-5-vinyloxazolidine-2,4-dione

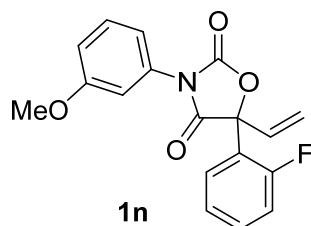

yellow oil, 763.4 mg, 47%.  $^1\text{H}$  NMR (500 MHz,  $\text{CDCl}_3$ ):  $\delta$  = 7.57 – 7.36 (m, 3H), 7.27 – 7.10 (m, 2H), 7.09 – 7.02 (dd,  $J$  = 8.0, 1.5 Hz, 1H), 7.01 – 6.92 (m, 2H), 6.43 – 6.30 (dd,  $J$  = 17.0, 11.0 Hz, 1H), 5.95 – 5.85 (d,  $J$  = 17.0 Hz, 1H), 5.77 – 5.66 (d,  $J$  = 11.0 Hz, 1H), 3.83 (s, 3H).  $^{13}\text{C}$  NMR ( $\text{CDCl}_3$ , 125 MHz):  $\delta$  = 170.9, 161.2 (d,  $J$  = 248.8 Hz), 160.3, 153.2, 132.6 (d,  $J$  = 8.9 Hz), 132.0, 130.9, 130.3 (d,  $J$  = 2.6 Hz), 130.2, 124.6 (d,  $J$  = 3.4 Hz), 122.2 (d,  $J$  = 11.9 Hz), 120.0, 118.1, 116.5 (d,  $J$  = 21.4 Hz), 115.1, 111.7, 85.0, 55.5.  $^{19}\text{F}$  NMR ( $\text{CDCl}_3$ , 470 MHz):  $\delta$  = -112.1. HRMS (ESI,  $m/z$ ) calcd for  $\text{C}_{18}\text{H}_{15}\text{FNO}_4$   $[\text{M}+\text{H}]^+$ : 328.0980, found: 328.0977.



### 5-(4-fluorophenyl)-3-(3-methoxyphenyl)-5-vinyloxazolidine-2,4-dione

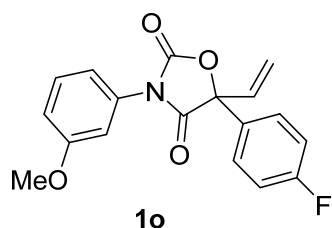

yellow oil, 988.2 mg, 60%.  $^1\text{H}$  NMR (500 MHz,  $\text{CDCl}_3$ ):  $\delta$  = 7.68 – 7.57 (m, 2H), 7.44 – 7.32 (m, 1H), 7.19 – 7.07 (m, 2H), 7.04– 6.90 (m, 3H), 6.30 – 6.17 (dd,  $J$  = 17.0, 10.5 Hz, 1H), 5.75 – 5.62 (d,  $J$  = 17.0 Hz, 1H), 5.57 – 5.46 (d,  $J$  = 10.5 Hz, 1H), 3.81 (s, 3H).  $^{13}\text{C}$  NMR ( $\text{CDCl}_3$ , 125 MHz):  $\delta$  = 170.5, 163.3 (d,  $J$  = 248.1 Hz), 160.2, 152.8, 133.2, 131.6, 130.6 (d,  $J$  = 3.1 Hz), 130.1, 127.6 (d,  $J$  = 8.5 Hz), 118.6, 117.8, 116.0 (d,  $J$  = 21.8 Hz), 115.0, 111.5, 86.7, 55.5.  $^{19}\text{F}$  NMR ( $\text{CDCl}_3$ , 470 MHz):  $\delta$  = –111.6. HRMS (ESI,  $m/z$ ) calcd for  $\text{C}_{18}\text{H}_{15}\text{FNO}_4$  [ $\text{M}+\text{H}$ ] $^+$ : 328.0980, found: 328.0975.

### 5-(3-chlorophenyl)-3-(3-methoxyphenyl)-5-vinyloxazolidine-2,4-dione

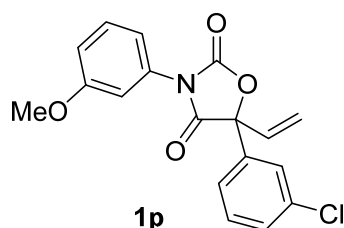

yellow oil, 949.6 mg, 55%.  $^1\text{H}$  NMR (500 MHz,  $\text{CDCl}_3$ ):  $\delta$  = 7.70 – 7.61 (m, 1H), 7.59 – 7.48 (m, 1H), 7.44 – 7.32 (m, 3H), 7.04– 6.88 (m, 3H), 6.29 – 6.17 (dd,  $J$  = 17.0, 10.5 Hz, 1H), 5.77 – 5.67 (d,  $J$  = 17.0 Hz, 1H), 5.58 – 5.46 (d,  $J$  = 10.5 Hz, 1H), 3.81 (s, 3H).  $^{13}\text{C}$  NMR ( $\text{CDCl}_3$ , 125 MHz):  $\delta$  = 170.1, 160.2, 152.6, 136.7, 135.1, 133.0, 131.5, 130.3, 130.1, 129.7, 125.7, 123.5, 118.8, 117.8, 115.1, 111.4, 86.4, 55.6. HRMS (ESI,  $m/z$ ) calcd for  $\text{C}_{18}\text{H}_{15}^{35}\text{ClNO}_4$  [ $\text{M}+\text{H}$ ] $^+$ : 344.0684, found: 344.0685.

### 5-(4-chlorophenyl)-3-(3-methoxyphenyl)-5-vinyloxazolidine-2,4-dione

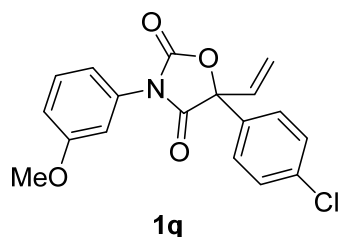

white solid, 866.7 mg, 50%, Mp: 100 – 102 °C.  $^1\text{H}$  NMR (500 MHz,  $\text{CDCl}_3$ ):  $\delta$  = 7.63 – 7.52 (m, 2H), 7.46 – 7.32 (m, 3H), 7.02 – 6.90 (m, 3H), 6.30 – 6.17 (dd,  $J$  = 17.0, 10.5 Hz, 1H), 5.75 – 5.65 (d,  $J$  = 17.0 Hz, 1H), 5.57 – 5.47 (d,  $J$  = 10.5 Hz, 1H), 3.81 (s, 3H).  $^{13}\text{C}$  NMR ( $\text{CDCl}_3$ , 125 MHz):  $\delta$  = 170.3, 160.2, 152.7, 135.7, 133.3, 133.1, 131.6, 130.1, 129.2, 126.9, 118.7, 117.8, 115.1, 111.4, 86.6, 55.6. HRMS (ESI,  $m/z$ ) calcd for  $\text{C}_{18}\text{H}_{15}^{35}\text{ClNO}_4$  [ $\text{M}+\text{H}$ ] $^+$ : 344.0684, found: 344.0682.

### 5-(3,4-dichlorophenyl)-3-(3-methoxyphenyl)-5-vinyloxazolidine-2,4-dione

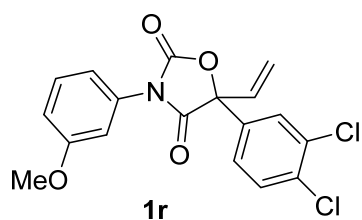

yellow oil, 958.6 mg, 51%.  $^1\text{H}$  NMR (500 MHz,  $\text{CDCl}_3$ ):  $\delta$  = 7.80 – 7.73 (d,  $J$  = 2.0 Hz, 1H), 7.55 – 7.45 (m, 2H), 7.42 – 7.34 (t,  $J$  = 8.0 Hz, 1H), 7.03– 6.89 (m, 3H), 6.27 – 6.15 (dd,  $J$  = 17.0, 11.0 Hz, 1H), 5.76 – 5.66 (d,  $J$  = 17.0 Hz, 1H), 5.58 – 5.48 (d,  $J$  = 11.0 Hz, 1H), 3.81 (s, 3H).  $^{13}\text{C}$  NMR ( $\text{CDCl}_3$ , 125 MHz):  $\delta$  = 169.9, 160.3, 152.4, 134.8, 134.0, 133.5, 132.7, 131.4, 131.0, 130.2, 127.5, 124.7, 119.1, 117.7, 115.2, 111.4, 85.9, 55.6. HRMS (ESI,  $m/z$ ) calcd for  $\text{C}_{18}\text{H}_{14}^{35}\text{Cl}_2\text{NO}_4$   $[\text{M}+\text{H}]^+$ : 378.0294, found: 378.0293.

### 5-(3-bromophenyl)-3-(3-methoxyphenyl)-5-vinyloxazolidine-2,4-dione

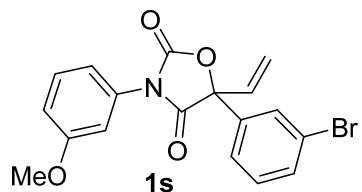

yellow oil, 896.0 mg, 46%.  $^1\text{H}$  NMR (500 MHz,  $\text{CDCl}_3$ ):  $\delta$  = 7.84 – 7.76 (m, 1H), 7.62 – 7.51 (m, 2H), 7.41 – 7.35 (t,  $J$  = 8.0 Hz, 1H), 7.35– 7.28 (t,  $J$  = 8.0 Hz, 1H), 7.06 – 6.91 (m, 3H), 6.28 – 6.16 (dd,  $J$  = 17.0, 11.0 Hz, 1H), 5.76 – 5.65 (d,  $J$  = 17.0 Hz, 1H), 5.57 – 5.48 (d,  $J$  = 11.0 Hz, 1H), 3.81 (s, 3H).  $^{13}\text{C}$  NMR ( $\text{CDCl}_3$ , 125 MHz):  $\delta$  = 170.1, 160.2, 152.6, 136.9, 133.0, 132.6, 130.6, 130.1, 128.5, 124.0, 123.1, 118.8, 117.8, 115.1, 111.4, 86.3, 55.6. HRMS (ESI,  $m/z$ ) calcd for  $\text{C}_{18}\text{H}_{15}^{79}\text{BrNO}_4$   $[\text{M}+\text{H}]^+$ : 388.0179, found: 388.0178.

### 5-(4-bromophenyl)-3-(3-methoxyphenyl)-5-vinyloxazolidine-2,4-dione

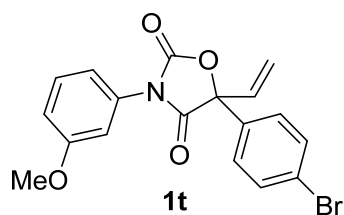

yellow oil, 993.9 mg, 51%.  $^1\text{H}$  NMR (500 MHz,  $\text{CDCl}_3$ ):  $\delta$  = 7.62 – 7.55 (d,  $J$  = 8.5 Hz, 2H), 7.55 – 7.48 (d,  $J$  = 7.5 Hz, 2H), 7.43 – 7.32 (t,  $J$  = 8.0 Hz, 1H), 7.02– 6.89 (m, 3H), 6.29 – 6.16 (dd,  $J$  = 17.0, 11.0 Hz, 1H), 5.74 – 5.65 (d,  $J$  = 17.0 Hz, 1H), 5.56 – 5.47 (d,  $J$  = 11.0 Hz, 1H), 3.80 (s, 3H).  $^{13}\text{C}$  NMR ( $\text{CDCl}_3$ , 125 MHz):  $\delta$  = 170.3, 160.2, 152.7, 133.8, 133.0, 132.2, 131.6, 130.1, 127.1, 123.9, 118.8, 117.8, 115.1, 111.4, 86.6, 55.6. HRMS (ESI,  $m/z$ ) calcd for  $\text{C}_{18}\text{H}_{15}^{79}\text{BrNO}_4$   $[\text{M}+\text{H}]^+$ : 388.0179, found: 388.0178.

### 3-(3-methoxyphenyl)-5-(*m*-tolyl)-5-vinyloxazolidine-2,4-dione

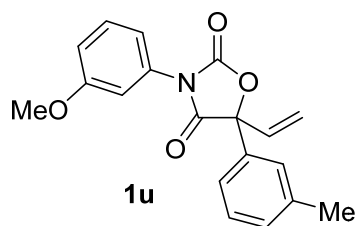

yellow oil, 613.9 mg, 38%.  $^1\text{H}$  NMR (500 MHz,  $\text{CDCl}_3$ ):  $\delta$  = 7.47 – 7.40 (m, 2H), 7.40 – 7.29 (m, 2H), 7.29 – 7.19 (t,  $J$  = 6.5 Hz, 1H), 7.04 – 6.98 (dd,  $J$  = 8.5, 2.0 Hz, 1H), 6.98 – 6.91 (m, 2H), 6.32 – 6.21 (dd,  $J$  = 17.0, 10.5 Hz, 1H), 5.75 – 5.64 (d,  $J$  = 17.0 Hz, 1H), 5.54 – 5.44 (d,  $J$  = 10.5 Hz, 1H), 3.80 (s, 3H), 2.39 (s, 3H).  $^{13}\text{C}$  NMR ( $\text{CDCl}_3$ , 125 MHz):  $\delta$  = 170.7, 160.2, 153.0, 138.9, 134.8, 133.4, 131.8, 130.2, 130.1, 128.9, 125.9, 122.5, 118.2, 117.9, 115.0, 111.5, 87.3, 55.6, 21.6. HRMS (ESI,  $m/z$ ) calcd for  $\text{C}_{19}\text{H}_{18}\text{NO}_4$   $[\text{M}+\text{H}]^+$ : 324.1230, found: 324.1227.

### 3-(3-methoxyphenyl)-5-(*p*-tolyl)-5-vinyloxazolidine-2,4-dione

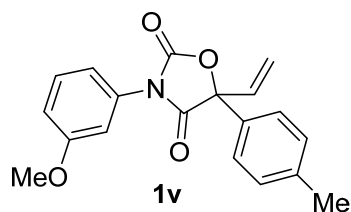

yellow oil, 982.7 mg, 61%.  $^1\text{H}$  NMR (500 MHz,  $\text{CDCl}_3$ ):  $\delta$  = 7.55 – 7.45 (d,  $J$  = 8.0 Hz, 2H), 7.42 – 7.30 (t,  $J$  = 9.5 Hz, 1H), 7.28 – 7.18 (d,  $J$  = 8.0 Hz, 2H), 7.05 – 6.98 (d,  $J$  = 7.5 Hz, 1H), 6.98 – 6.87 (m, 2H), 6.35 – 6.18 (dd,  $J$  = 17.5, 11.0 Hz, 1H), 5.76 – 5.64 (d,  $J$  = 17.5 Hz, 1H), 5.54 – 5.42 (d,  $J$  = 11.0 Hz, 1H), 3.79 (s, 3H), 2.36 (s, 3H).  $^{13}\text{C}$  NMR ( $\text{CDCl}_3$ , 125 MHz):  $\delta$  = 170.8, 160.2, 153.1, 139.6, 133.4, 131.9, 131.8, 130.1, 129.7, 125.4, 118.2, 117.9, 115.0, 111.5, 87.3, 55.5, 21.2. HRMS (ESI,  $m/z$ ) calcd for  $\text{C}_{19}\text{H}_{18}\text{NO}_4$   $[\text{M}+\text{H}]^+$ : 324.1230, found: 324.1229.

### 5-(4-isopropylphenyl)-3-(3-methoxyphenyl)-5-vinyloxazolidine-2,4-dione

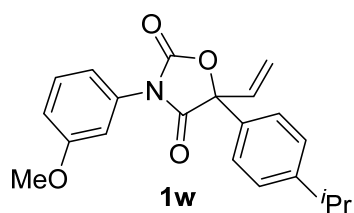

yellow oil, 822.6 mg, 47%.  $^1\text{H}$  NMR (500 MHz,  $\text{CDCl}_3$ ):  $\delta$  = 7.58 – 7.51 (d,  $J$  = 8.0 Hz, 2H), 7.40 – 7.33 (t,  $J$  = 8.0 Hz, 1H), 7.33 – 7.26 (d,  $J$  = 8.0 Hz, 2H), 7.04 – 6.98 (m, 1H), 6.97 – 6.90 (m, 2H), 6.32 – 6.21 (dd,  $J$  = 17.5, 11.0 Hz, 1H), 5.75 – 5.66 (d,  $J$  = 17.5 Hz, 1H), 5.52 – 5.43 (d,  $J$  = 11.0 Hz, 1H), 3.80 (s, 3H), 2.99 – 2.72 (m, 1H), 1.32 – 1.12 (d,  $J$  = 8.0 Hz, 6H).  $^{13}\text{C}$  NMR ( $\text{CDCl}_3$ , 125 MHz):  $\delta$  = 170.8, 160.2, 153.1, 150.4, 133.4, 132.2, 131.8, 130.1, 127.1, 125.5, 118.1, 117.9, 115.0, 111.5, 87.3, 55.5, 33.9, 23.9, 23.9. HRMS (ESI,  $m/z$ ) calcd for  $\text{C}_{21}\text{H}_{22}\text{NO}_4$   $[\text{M}+\text{H}]^+$ : 352.1543, found: 352.1542.

### 5-(4-cyclohexylphenyl)-3-(3-methoxyphenyl)-5-vinyloxazolidine-2,4-dione

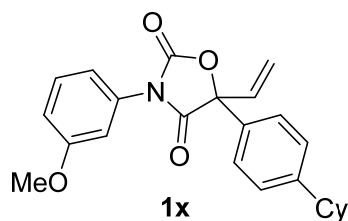

white solid, 991.2 mg, 51%, Mp: 105 – 107 °C. <sup>1</sup>H NMR (500 MHz, CDCl<sub>3</sub>): δ = 7.59 – 7.49 (d, *J* = 8.5 Hz, 2H), 7.42 – 7.31 (m, 1H), 7.31 – 7.25 (d, *J* = 8.0 Hz, 2H), 7.06 – 6.98 (d, *J* = 7.5 Hz, 1H), 6.97 – 6.89 (m, 2H), 6.35 – 6.21 (dd, *J* = 17.0, 10.5 Hz, 1H), 5.75 – 5.65 (d, *J* = 17.0 Hz, 1H), 5.53 – 5.44 (d, *J* = 10.5 Hz, 1H), 3.80 (s, 3H), 2.59 – 2.40 (m, 1H), 1.94 – 1.78 (m, 4H), 1.78 – 1.66 (m, 1H), 1.48 – 1.32 (m, 4H), 1.32 – 1.15 (m, 1H). <sup>13</sup>C NMR (CDCl<sub>3</sub>, 125 MHz): δ = 170.8, 160.2, 153.1, 149.6, 133.4, 132.2, 131.8, 130.1, 127.5, 125.4, 118.1, 117.9, 115.0, 111.5, 87.3, 55.5, 44.3, 34.3, 34.3, 26.8, 26.1. HRMS (ESI, *m/z*) calcd for C<sub>24</sub>H<sub>26</sub>NO<sub>4</sub> [M+H]<sup>+</sup>: 392.1856, found: 392.1855.

### 5-(4-*tert*-butylphenyl)-3-(3-methoxyphenyl)-5-vinyloxazolidine-2,4-dione

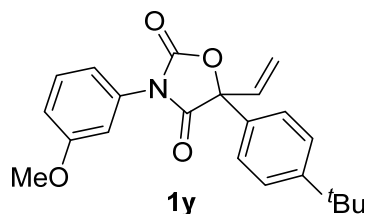

yellow oil, 820.7 mg, 45%. <sup>1</sup>H NMR (500 MHz, CDCl<sub>3</sub>): δ = 7.59 – 7.51 (d, *J* = 8.5 Hz, 2H), 7.51 – 7.43 (d, *J* = 8.5 Hz, 2H), 7.42 – 7.30 (m, 1H), 7.05 – 6.98 (m, 1H), 6.98 – 6.90 (m, 2H), 6.33 – 6.22 (dd, *J* = 17.0, 11.0 Hz, 1H), 5.77 – 5.67 (d, *J* = 17.0 Hz, 1H), 5.53 – 5.45 (d, *J* = 11.0 Hz, 1H), 3.80 (s, 3H), 1.32 (s, 9H). <sup>13</sup>C NMR (CDCl<sub>3</sub>, 125 MHz): δ = 170.8, 160.2, 153.1, 152.7, 133.4, 131.8, 131.8, 130.1, 126.0, 125.2, 118.1, 117.9, 115.0, 111.5, 87.3, 55.5, 34.7, 31.2. HRMS (ESI, *m/z*) calcd for C<sub>22</sub>H<sub>24</sub>NO<sub>4</sub> [M+H]<sup>+</sup>: 366.1700, found: 366.1699.

### 3-(3-methoxyphenyl)-5-(naphthalen-2-yl)-5-vinyloxazolidine-2,4-dione

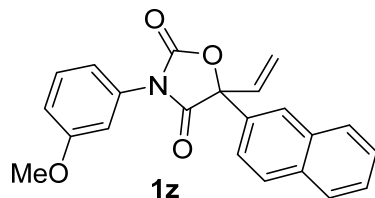

yellow oil, 980.2 mg, 54%. <sup>1</sup>H NMR (500 MHz, CDCl<sub>3</sub>): δ = 8.20 – 8.09 (d, *J* = 2.5 Hz, 1H), 7.97 – 7.80 (m, 3H), 7.75 – 7.66 (m, 1H), 7.57 – 7.48 (m, 2H), 7.41 – 7.32 (t, *J* = 8.0 Hz, 1H), 7.06 – 6.99 (d, *J* = 8.0 Hz, 1H), 6.99 – 6.89 (m, 2H), 6.43 – 6.30 (dd, *J* = 17.0, 10.5 Hz, 1H), 5.83 – 5.72 (d, *J* = 17.0 Hz, 1H), 5.59 – 5.49 (d, *J* = 10.5 Hz, 1H), 3.79 (s, 3H). <sup>13</sup>C NMR (CDCl<sub>3</sub>, 125 MHz): δ = 170.7, 160.3, 153.0, 133.5, 133.3, 132.9, 132.0, 131.8, 130.1, 129.1, 128.6, 127.8, 127.3, 126.9, 124.8, 122.7, 118.7, 117.9, 115.1, 111.5, 87.4, 55.6. HRMS (ESI, *m/z*) calcd for C<sub>22</sub>H<sub>18</sub>NO<sub>4</sub> [M+H]<sup>+</sup>: 360.1230, found: 360.1229.

### 3-(3-methoxyphenyl)-5-(thiophen-3-yl)-5-vinyloxazolidine-2,4-dione

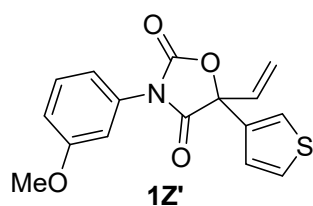

yellow oil, 570.3 mg, 36%.  $^1\text{H}$  NMR (500 MHz,  $\text{CDCl}_3$ ):  $\delta$  = 7.57 – 7.50 (m, 1H), 7.45 – 7.33 (m, 2H), 7.27 – 7.19 (m, 1H), 7.04 – 6.98 (m, 1H), 6.98 – 6.91 (m, 2H), 6.32 – 6.19 (dd,  $J$  = 17.0, 11.0 Hz, 1H), 5.74 – 5.64 (d,  $J$  = 17.0 Hz, 1H), 5.54 – 5.45 (d,  $J$  = 11.0 Hz, 1H), 3.81 (s, 3H).  $^{13}\text{C}$  NMR ( $\text{CDCl}_3$ , 125 MHz):  $\delta$  = 170.3, 160.2, 152.9, 135.3, 132.8, 131.7, 130.1, 127.5, 125.2, 123.5, 118.5, 117.8, 115.0, 111.5, 85.9, 55.6. HRMS (ESI,  $m/z$ ) calcd for  $\text{C}_{16}\text{H}_{14}\text{NO}_4\text{S}$   $[\text{M}+\text{H}]^+$ : 316.0638, found: 316.0636.

### 5-(4-chlorophenyl)-3-(4-methoxyphenyl)-5-vinyloxazolidine-2,4-dione

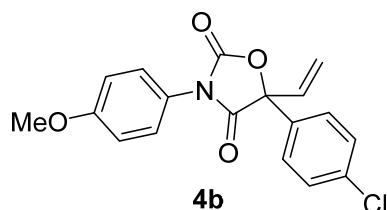

white solid, 770.6 mg, 45%, Mp: 110 – 112 °C.  $^1\text{H}$  NMR (500 MHz,  $\text{CDCl}_3$ ):  $\delta$  = 7.63 – 7.53 (m, 2H), 7.45 – 7.39 (m, 2H), 7.33 – 7.27 (m, 2H), 7.01 – 6.93 (m, 2H), 6.30 – 6.16 (dd,  $J$  = 17.0, 10.5 Hz, 1H), 5.73 – 5.66 (d,  $J$  = 17.0 Hz, 1H), 5.55 – 5.45 (d,  $J$  = 10.5 Hz, 1H), 3.82 (s, 3H).  $^{13}\text{C}$  NMR ( $\text{CDCl}_3$ , 125 MHz):  $\delta$  = 170.6, 159.9, 153.1, 135.7, 133.3, 133.1, 129.2, 127.1, 126.9, 123.1, 118.6, 114.7, 86.7, 55.6. HRMS (ESI,  $m/z$ ) calcd for  $\text{C}_{18}\text{H}_{15}^{35}\text{ClNO}_4$   $[\text{M}+\text{H}]^+$ : 344.0684, found: 344.0682.

### 5-(4-bromophenyl)-3-(4-methoxyphenyl)-5-vinyloxazolidine-2,4-dione

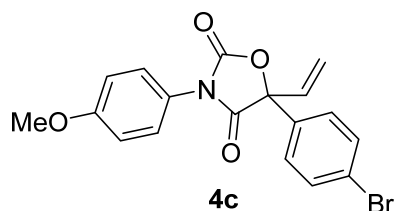

yellow oil, 847.3 mg, 44%.  $^1\text{H}$  NMR (500 MHz,  $\text{CDCl}_3$ ):  $\delta$  = 7.60 – 7.55 (m, 2H), 7.53 – 7.49 (m, 2H), 7.32 – 7.27 (m, 2H), 7.01 – 6.92 (m, 2H), 6.28 – 6.18 (dd,  $J$  = 17.0, 10.5 Hz, 1H), 5.73 – 5.65 (d,  $J$  = 17.0 Hz, 1H), 5.54 – 5.48 (d,  $J$  = 10.5 Hz, 1H), 3.82 (s, 3H).  $^{13}\text{C}$  NMR ( $\text{CDCl}_3$ , 125 MHz):  $\delta$  = 170.5, 159.9, 153.1, 133.9, 133.1, 132.2, 127.1, 123.9, 123.1, 118.7, 114.7, 86.7, 55.6. HRMS (ESI,  $m/z$ ) calcd for  $\text{C}_{18}\text{H}_{15}^{79}\text{BrNO}_4$   $[\text{M}+\text{H}]^+$ : 388.0179, found: 388.0172.

### 3-(4-methoxyphenyl)-5-(*p*-tolyl)-5-vinyloxazolidine-2,4-dione

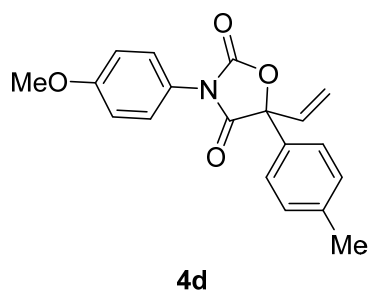

white solid, 814.1 mg, 50%, Mp: 100 – 102 °C. <sup>1</sup>H NMR (500 MHz, CDCl<sub>3</sub>): δ = 7.54 – 7.45 (m, 2H), 7.36 – 7.29 (m, 2H), 7.29 – 7.19 (m, 2H), 7.02 – 6.93 (m, 2H), 6.32 – 6.21 (dd, *J* = 17.5, 11.0 Hz, 1H), 5.74 – 5.65 (d, *J* = 17.5 Hz, 1H), 5.53 – 5.44 (d, *J* = 11.0 Hz, 1H), 3.81 (s, 3H), 2.37 (s, 3H). <sup>13</sup>C NMR (CDCl<sub>3</sub>, 125 MHz): δ = 171.1, 159.8, 153.5, 139.5, 133.4, 132.0, 129.7, 127.2, 125.4, 123.4, 118.2, 114.6, 87.4, 55.6, 21.2. HRMS (ESI, *m/z*) calcd for C<sub>19</sub>H<sub>18</sub>NO<sub>4</sub> [M+H]<sup>+</sup>: 324.123, found: 324.1229.

### 3-(4-methoxyphenyl)-5-(naphthalen-2-yl)-5-vinyloxazolidine-2,4-dione

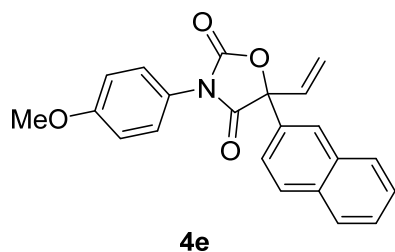

white solid, 832.8 mg, 46%, Mp: 142 – 144 °C. <sup>1</sup>H NMR (500 MHz, CDCl<sub>3</sub>): δ = 8.17 – 8.09 (d, *J* = 2.0 Hz, 1H), 7.93 – 7.80 (m, 3H), 7.73 – 7.66 (m, 1H), 7.55 – 7.46 (m, 2H), 7.35 – 7.29 (m, 2H), 7.02 – 6.91 (m, 2H), 6.40 – 6.30 (dd, *J* = 17.0, 11.0 Hz, 1H), 5.82 – 5.72 (d, *J* = 17.0 Hz, 1H), 5.59 – 5.49 (d, *J* = 11.0 Hz, 1H), 3.79 (s, 3H). <sup>13</sup>C NMR (CDCl<sub>3</sub>, 125 MHz): δ = 171.0, 159.9, 153.5, 133.4, 133.4, 132.9, 132.1, 129.1, 128.6, 127.8, 127.2, 126.9, 124.8, 123.3, 122.8, 118.6, 114.68, 87.5, 55.6. HRMS (ESI, *m/z*) calcd for C<sub>22</sub>H<sub>18</sub>NO<sub>4</sub> [M+H]<sup>+</sup>: 360.123, found: 360.1228.

### 3-(4-methoxyphenyl)-5-(thiophen-3-yl)-5-vinyloxazolidine-2,4-dione

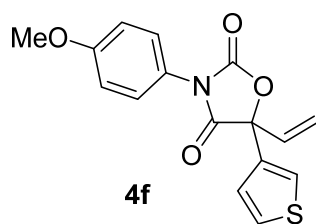

yellow oil, 802.4 mg, 51%.  $^1\text{H}$  NMR (500 MHz,  $\text{CDCl}_3$ ):  $\delta$  = 7.56 – 7.51 (m, 1H), 7.44 – 7.38 (m, 1H), 7.35 – 7.28 (m, 2H), 7.25 – 7.20 (m, 1H), 7.02 – 6.94 (m, 2H), 6.29 – 6.19 (dd,  $J$  = 17.0, 10.5 Hz, 1H), 5.73 – 5.64 (d,  $J$  = 17.0 Hz, 1H), 5.53 – 5.46 (d,  $J$  = 10.5 Hz, 1H), 3.82 (s, 3H).  $^{13}\text{C}$  NMR ( $\text{CDCl}_3$ , 125 MHz):  $\delta$  = 170.6, 159.9, 153.3, 135.3, 132.9, 127.5, 127.1, 125.2, 123.4, 123.2, 118.4, 114.7, 86.0, 55.6. HRMS (ESI,  $m/z$ ) calcd for  $\text{C}_{16}\text{H}_{14}\text{NO}_4\text{S}$   $[\text{M}+\text{H}]^+$ : 316.0638, found: 316.0635.

### (*R*, *Z*)-1,3-diphenyl-6-tosyl-1,5,6,13b-tetrahydro-2*H*-[1,2,4]triazocino[2,3-*c*]quinazolin-2-one

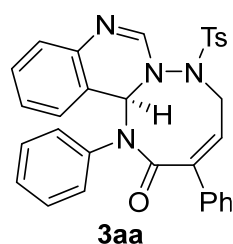

colorless oil, 51.4 mg, 96%, 90% *ee*,  $[\alpha]_D^{25} = 64.0$  ( $c$  0.5,  $\text{CH}_2\text{Cl}_2$ ).  $^1\text{H}$  NMR (500 MHz,  $\text{CDCl}_3$ ):  $\delta$  = 7.64 – 7.54 (m, 2H), 7.52 – 7.40 (m, 5H), 7.28 – 7.19 (m, 2H), 7.16 – 7.01 (m, 5H), 6.97 – 6.86 (m, 3H), 6.82 – 6.75 (m, 2H), 6.73 – 6.58 (d,  $J$  = 7.5 Hz, 2H), 5.14 – 5.03 (dd,  $J$  = 15.5, 7.0 Hz, 1H), 4.43 – 4.32 (dd,  $J$  = 15.5, 10.5 Hz, 1H), 2.32 (s, 3H).  $^{13}\text{C}$  NMR ( $\text{CDCl}_3$ , 125 MHz):  $\delta$  = 168.0, 146.5, 145.8, 141.7, 141.0, 136.2, 134.9, 133.0, 123.0, 129.9, 129.5, 129.4, 129.0, 128.9, 128.6, 128.5, 127.1, 126.6, 126.2, 126.0, 123.8, 119.9, 69.7, 49.1, 21.7. IR (film)  $\nu_{\text{max}}$  = 2923, 1661, 1650, 1614, 1598, 1275, 1261, 1165, 764, 750. HRMS (ESI,  $m/z$ ) calcd for  $\text{C}_{31}\text{H}_{27}\text{N}_4\text{O}_3\text{S}$   $[\text{M}+\text{H}]^+$ : 535.1798, found: 535.1799. The *ee* value was determined by the chiral HPLC analysis (CHIRALPAK AD-H, *n*-hexane/2-propanol = 60 : 40,  $\nu$  = 1.0 mL/min,  $\lambda$  = 254.0 nm;  $t_{\text{major}}$  = 8.7 min,  $t_{\text{minor}}$  = 17.3 min).

**(R, Z)-1-(3-fluorophenyl)-3-phenyl-6-tosyl-1,5,6,13b-tetrahydro-2H-[1,2,4]triazocino[2,3-c]quinazolin-2-one**

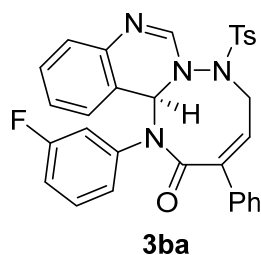

colorless oil, 44.2 mg, 80%, 90% *ee*,  $[\alpha]_D^{25} = 80.0$  (*c* 0.5, CH<sub>2</sub>Cl<sub>2</sub>). <sup>1</sup>H NMR (500 MHz, CDCl<sub>3</sub>):  $\delta = 7.60 - 7.55$  (m, 2H), 7.52 – 7.41 (m, 5H), 7.30 – 7.22 (m, 2H), 7.12 – 7.07 (d, *J* = 8.0 Hz, 2H), 7.07 – 7.01 (m, 1H), 6.98 – 6.93 (m, 2H), 6.89 – 6.77 (m, 4H), 6.55 – 6.48 (d, *J* = 8.0 Hz, 1H), 6.39 – 6.30 (d, *J* = 9.5 Hz, 1H), 5.13 – 5.03 (dd, *J* = 15.5, 7.0 Hz, 1H), 4.36 – 4.26 (dd, *J* = 15.5, 10.0 Hz, 1H), 2.33 (s, 3H). <sup>13</sup>C NMR (CDCl<sub>3</sub>, 125 MHz):  $\delta = 167.9, 162.1$  (d, *J* = 246.5 Hz), 146.4, 145.9, 141.5, 140.9, 137.7 (d, *J* = 9.6 Hz), 134.8, 132.9, 130.2, 130.0, 129.7 (d, *J* = 8.9 Hz), 129.5, 129.1, 128.9, 127.0, 126.6, 126.5, 126.1, 125.3, 124.1, 119.5, 117.3 (d, *J* = 22.8 Hz), 115.7 (d, *J* = 20.8 Hz), 69.8, 49.1, 21.7. <sup>19</sup>F NMR (CDCl<sub>3</sub>, 470 MHz):  $\delta = -112.0$ . IR (film)  $\nu_{\max} = 2921, 1667, 1614, 1597, 1488, 1387, 1164, 1087, 765, 706$ . HRMS (ESI, *m/z*) calcd for C<sub>31</sub>H<sub>26</sub>FN<sub>4</sub>O<sub>3</sub>S [M+H]<sup>+</sup>: 553.1704, found: 553.1706. The *ee* value was determined by the chiral HPLC analysis (CHIRALPAK AD-H, *n*-hexane/2-propanol = 60 : 40,  $\nu = 1.0$  mL/min,  $\lambda = 254.0$  nm;  $t_{\text{major}} = 8.8$  min,  $t_{\text{minor}} = 15.4$  min).

**(R, Z)-1-(4-fluorophenyl)-3-phenyl-6-tosyl-1,5,6,13b-tetrahydro-2H-[1,2,4]triazocino[2,3-c]quinazolin-2-one**

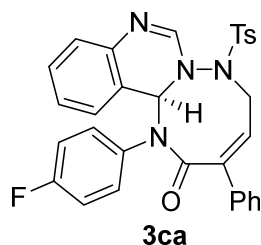

yellow oil, 49.2 mg, 89%, 91% *ee*,  $[\alpha]_D^{25} = 72.0$  (*c* 0.5, CH<sub>2</sub>Cl<sub>2</sub>). <sup>1</sup>H NMR (500 MHz, CDCl<sub>3</sub>):  $\delta = 7.60 - 7.53$  (m, 2H), 7.51 – 7.48 (d, *J* = 2.0 Hz, 2H), 7.48 – 7.40 (m, 3H), 7.30 – 7.21 (m, 2H), 7.11 – 7.05 (d, *J* = 8.0 Hz, 2H), 6.99 – 6.90 (dd, *J* = 14.0, 8.0 Hz, 2H), 6.90 – 6.86 (d, *J* = 1.5 Hz, 1H), 6.85 – 6.69 (m, 4H), 6.69 – 6.52 (m, 2H), 5.12 – 5.03 (dd, *J* = 15.5, 7.0 Hz, 1H), 4.36 – 4.24 (dd, *J* = 15.5, 10.0 Hz, 1H), 2.32 (s, 3H). <sup>13</sup>C NMR (CDCl<sub>3</sub>, 125 MHz):  $\delta = 168.1, 162.2$  (d, *J* = 247.3 Hz), 146.4, 145.9, 141.6, 141.0, 134.8, 132.9, 132.1 (d, *J* = 3.3 Hz), 131.2, 130.1, 130.0, 129.4, 129.0, 128.8, 126.9, 126.6, 126.4, 126.1, 124.0, 119.8, 115.7 (d, *J* = 22.5 Hz), 69.7, 49.1, 21.7. <sup>19</sup>F NMR (CDCl<sub>3</sub>, 470 MHz):  $\delta = -112.5$ . IR (film)  $\nu_{\max} = 2922, 2851, 1662, 1615, 1598, 1508, 1389, 1165, 814, 764$ . HRMS (ESI, *m/z*) calcd for C<sub>31</sub>H<sub>26</sub>FN<sub>4</sub>O<sub>3</sub>S [M+H]<sup>+</sup>: 553.1704, found: 553.1702. The *ee* value was determined by the chiral HPLC analysis (CHIRALPAK AD-H, *n*-hexane/2-propanol = 60 : 40,  $\nu = 1.0$  mL/min,  $\lambda = 254.0$  nm;  $t_{\text{major}} = 12.1$  min,  $t_{\text{minor}} = 25.8$  min).



**(R, Z)-1-(3-chlorophenyl)-3-phenyl-6-tosyl-1,5,6,13b-tetrahydro-2H-[1,2,4]triazocino [2,3-c]quinazolin-2-one**

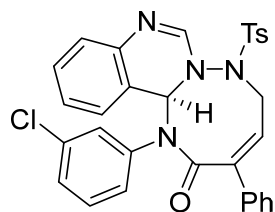

**3da**

colorless oil, 43.6 mg, 77%, 91% *ee*,  $[\alpha]_D^{25} = 80.0$  (*c* 0.5, CH<sub>2</sub>Cl<sub>2</sub>). <sup>1</sup>H NMR (500 MHz, CDCl<sub>3</sub>):  $\delta = 7.62 - 7.54$  (m, 2H), 7.53 – 7.39 (m, 5H), 7.31 – 7.23 (m, 2H), 7.14 – 7.07 (m, 3H), 7.04 – 6.93 (m, 3H), 6.89 – 6.84 (m, 2H), 6.83– 6.77 (dd, *J* = 10.5, 7.0 Hz, 1H), 6.60 (s, 2H), 5.14 – 5.03 (dd, *J* = 15.5, 7.0 Hz, 1H), 4.36 – 4.27 (dd, *J* = 15.5, 10.5 Hz, 1H), 2.33 (s, 3H). <sup>13</sup>C NMR (CDCl<sub>3</sub>, 125 MHz):  $\delta = 167.9, 146.3, 145.9, 141.4, 140.9, 137.4, 134.8, 133.9, 132.9, 130.3, 130.0, 129.5, 129.1, 128.9, 128.8, 127.8, 127.0, 126.6, 126.5, 126.1, 124.1, 119.5, 69.8, 49.1, 21.7$ . IR (film)  $\nu_{\max} = 2921, 2851, 1661, 1614, 1597, 1387, 1165, 765, 751, 729$ . HRMS (ESI, *m/z*) calcd for C<sub>31</sub>H<sub>26</sub><sup>35</sup>ClN<sub>4</sub>O<sub>3</sub>S [M+H]<sup>+</sup>: 569.1409, found: 569.1410. The *ee* value was determined by the chiral HPLC analysis (CHIRALPAK AD-H, *n*-hexane/2-propanol = 60 : 40,  $\nu = 1.0$  mL/min,  $\lambda = 254.0$  nm;  $t_{\text{major}} = 8.6$  min,  $t_{\text{minor}} = 15.8$  min).

**(R, Z)-1-(4-chlorophenyl)-3-phenyl-6-tosyl-1,5,6,13b-tetrahydro-2H-[1,2,4]triazocino [2,3-c]quinazolin-2-one**

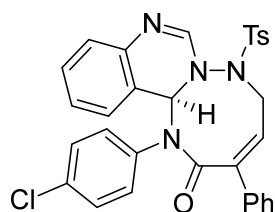

**3ea**

white solid, 52.3 mg, 91%, Mp: 195 – 197 °C, 92% *ee*,  $[\alpha]_D^{25} = 72.0$  (*c* 0.5, CH<sub>2</sub>Cl<sub>2</sub>). <sup>1</sup>H NMR (500 MHz, CDCl<sub>3</sub>):  $\delta = 7.62 - 7.51$  (m, 2H), 7.51 – 7.37 (m, 5H), 7.31 – 7.18 (m, 2H), 7.12 – 7.05 (d, *J* = 8.0 Hz, 2H), 7.05 – 6.99 (d, *J* = 8.0 Hz, 2H), 6.99 – 6.94 (dd, *J* = 7.5, 1.0 Hz, 1H), 6.94 – 6.85 (m, 2H), 6.82 – 6.73 (m, 2H), 6.66 – 6.48 (m, 2H), 5.13 – 4.99 (dd, *J* = 15.0, 6.5 Hz, 1H), 4.36 – 4.25 (dd, *J* = 15.0, 10.0 Hz, 1H), 2.31 (s, 3H). <sup>13</sup>C NMR (CDCl<sub>3</sub>, 125 MHz):  $\delta = 168.0, 146.4, 145.9, 141.5, 141.0, 134.8, 134.8, 134.5, 132.9, 130.8, 130.2, 130.0, 129.5, 129.1, 128.9, 128.8, 126.9, 126.6, 126.5, 126.2, 124.03, 119.6, 69.7, 49.1, 21.7$ . IR (film)  $\nu_{\max} = 2923, 2852, 1662, 1615, 1598, 1491, 1388, 1165, 1087, 764$ . HRMS (ESI, *m/z*) calcd for C<sub>31</sub>H<sub>26</sub><sup>35</sup>ClN<sub>4</sub>O<sub>3</sub>S [M+H]<sup>+</sup>: 569.1409, found: 569.1409. The *ee* value was determined by the chiral HPLC analysis (CHIRALPAK AD-H, *n*-hexane/2-propanol = 60 : 40,  $\nu = 1.0$  mL/min,  $\lambda = 254.0$  nm;  $t_{\text{major}} = 15.0$  min,  $t_{\text{minor}} = 24.8$  min).

**(R, Z)-1-(4-bromophenyl)-3-phenyl-6-tosyl-1,5,6,13b-tetrahydro-2H-[1,2,4]triazocino[2,3-c]quinazolin-2-one**

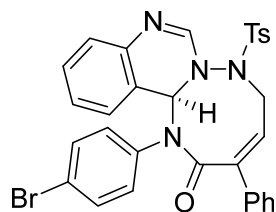

**3fa**

yellow oil, 46.8 mg, 76%, 91% *ee*,  $[\alpha]_D^{25} = 56.0$  (*c* 0.5, CH<sub>2</sub>Cl<sub>2</sub>). <sup>1</sup>H NMR (500 MHz, CDCl<sub>3</sub>):  $\delta = 7.58 - 7.53$  (m, 2H), 7.51 – 7.40 (m, 5H), 7.31 – 7.21 (m, 2H), 7.20 – 7.14 (d, *J* = 8.5 Hz, 2H), 7.11 – 7.05 (d, *J* = 8.0 Hz, 2H), 6.99 – 6.94 (dd, *J* = 8.0, 1.5 Hz, 1H), 6.94 – 6.90 (dd, *J* = 8.0, 1.5 Hz, 1H), 6.90 – 6.86 (d, *J* = 1.5 Hz, 1H), 6.82 – 6.75 (m, 2H), 6.58 – 6.49 (m, 2H), 5.17 – 4.93 (dd, *J* = 15.5, 7.0 Hz, 1H), 4.38 – 4.19 (dd, *J* = 15.5, 10.0 Hz, 1H), 2.32 (s, 3H). <sup>13</sup>C NMR (CDCl<sub>3</sub>, 125 MHz):  $\delta = 168.0, 146.4, 145.9, 141.5, 141.0, 135.3, 134.8, 132.9, 131.9, 131.1, 130.2, 130.0, 129.5, 129.1, 128.8, 126.9, 126.6, 126.4, 126.2, 124.0, 122.7, 119.6, 69.7, 49.1, 21.7$ . IR (film)  $\nu_{\max} = 2924, 1662, 1615, 1598, 1487, 1388, 1165, 1087, 764, 751$ . HRMS (ESI, *m/z*) calcd for C<sub>31</sub>H<sub>26</sub><sup>79</sup>BrN<sub>4</sub>O<sub>3</sub>S [M+H]<sup>+</sup>: 613.0903, found: 613.0897. The *ee* value was determined by the chiral HPLC analysis (CHIRALPAK AD-H, *n*-hexane/2-propanol = 60 : 40,  $\nu = 1.0$  mL/min,  $\lambda = 254.0$  nm;  $t_{\text{major}} = 14.6$  min,  $t_{\text{minor}} = 25.4$  min).

**(R, Z)-3-phenyl-6-tosyl-1-(4-(trifluoromethyl)phenyl)-1,5,6,13b-tetrahydro-2H-[1,2,4]triazocino[2,3-c]quinazolin-2-one**

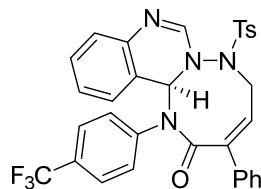

**3ga**

yellow oil, 42.5 mg, 71%, 90% *ee*,  $[\alpha]_D^{25} = 56.0$  (*c* 1.0, CH<sub>2</sub>Cl<sub>2</sub>). <sup>1</sup>H NMR (500 MHz, CDCl<sub>3</sub>):  $\delta = 7.61 - 7.54$  (m, 2H), 7.52 – 7.41 (m, 5H), 7.35 – 7.20 (m, 4H), 7.13 – 7.04 (d, *J* = 8.5 Hz, 2H), 6.99 – 6.90 (dd, *J* = 16.5, 6.0 Hz, 2H), 6.88 (s, 2H), 6.85 – 6.75 (m, 3H), 5.12 – 5.04 (dd, *J* = 15.0, 6.5 Hz, 1H), 4.37 – 4.27 (dd, *J* = 15.0, 10.0 Hz, 1H), 2.32 (s, 3H). <sup>13</sup>C NMR (CDCl<sub>3</sub>, 125 MHz):  $\delta = 168.0, 146.3, 146.0, 141.3, 140.9, 139.8, 134.7, 132.8, 130.4, 130.1, 130.0, 129.5, 129.1, 128.8, 126.9, 126.6, 126.5, 126.2, 125.7, 125.7, 124.2, 123.6$  (q, *J* = 270.9 Hz), 119.4, 69.8, 49.1, 21.6. <sup>19</sup>F NMR (CDCl<sub>3</sub>, 470 MHz):  $\delta = -62.8$ . IR (film)  $\nu_{\max} = 2922, 1665, 1615, 1598, 1388, 1324, 1165, 1064, 818, 765$ . HRMS (ESI, *m/z*) calcd for C<sub>32</sub>H<sub>26</sub>F<sub>3</sub>N<sub>4</sub>O<sub>3</sub>S [M+H]<sup>+</sup>: 603.1672, found: 603.1670. The *ee* value was determined by the chiral HPLC analysis (CHIRALPAK AD-H, *n*-hexane/2-propanol = 80 : 20,  $\nu = 1.0$  mL/min,  $\lambda = 254.0$  nm;  $t_{\text{major}} = 21.3$  min,  $t_{\text{minor}} = 26.4$  min).

**(R, Z)-3-phenyl-1-(*m*-tolyl)-6-tosyl-1,5,6,13b-tetrahydro-2*H*-[1,2,4]triazocino[2,3-*c*]quinazolin-2-one**

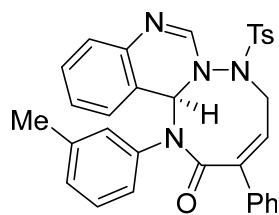

**3ha**

colorless oil, 51.4 mg, 94%, 92% *ee*,  $[\alpha]_D^{25} = 72.0$  (*c* 0.5, CH<sub>2</sub>Cl<sub>2</sub>). <sup>1</sup>H NMR (500 MHz, CDCl<sub>3</sub>):  $\delta = 7.62 - 7.55$  (m, 2H), 7.54 – 7.48 (d, *J* = 8.5 Hz, 2H), 7.47 – 7.39 (m, 3H), 7.28 – 7.20 (m, 2H), 7.11 – 7.05 (d, *J* = 8.0 Hz, 2H), 6.98 – 6.89 (m, 4H), 6.89 – 6.84 (d, *J* = 1.5 Hz, 1H), 6.82 – 6.75 (m, 2H), 6.55 – 6.30 (m, 2H), 5.12 – 5.01 (dd, *J* = 15.0, 6.5 Hz, 1H), 4.42 – 4.34 (dd, *J* = 15.0, 10.5 Hz, 1H), 2.32 (s, 3H), 2.08 (s, 3H). <sup>13</sup>C NMR (CDCl<sub>3</sub>, 125 MHz):  $\delta = 168.0, 146.4, 145.8, 141.8, 141.1, 138.4, 136.0, 134.9, 133.0, 123.0, 129.9, 129.3, 129.2, 129.0, 128.9, 128.4, 127.1, 126.7, 126.5, 126.2, 125.9, 123.7, 112.0, 69.7, 49.1, 21.6, 21.0$ . IR (film)  $\nu_{\max} = 2961, 2923, 2853, 1660, 1597, 1388, 1260, 1161, 1087, 1017, 801$ . HRMS (ESI, *m/z*) calcd for C<sub>32</sub>H<sub>29</sub>N<sub>4</sub>O<sub>3</sub>S [M+H]<sup>+</sup>: 549.1955, found: 549.1950. The *ee* value was determined by the chiral HPLC analysis (CHIRALPAK AD-H, *n*-hexane/2-propanol = 60 : 40,  $\nu = 1.0$  mL/min,  $\lambda = 254.0$  nm;  $t_{\text{major}} = 7.0$  min,  $t_{\text{minor}} = 15.2$  min).

**(R, Z)-3-phenyl-1-(*p*-tolyl)-6-tosyl-1,5,6,13b-tetrahydro-2*H*-[1,2,4]triazocino[2,3-*c*]quinazolin-2-one**

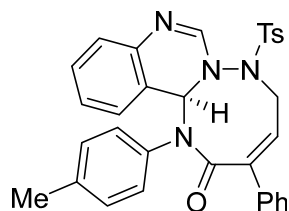

**3ia**

colorless oil, 51.3 mg, 94%, 90% *ee*,  $[\alpha]_D^{25} = 53.3$  (*c* 0.75, CH<sub>2</sub>Cl<sub>2</sub>). <sup>1</sup>H NMR (500 MHz, CDCl<sub>3</sub>):  $\delta = 7.59 - 7.53$  (m, 2H), 7.51 – 7.47 (d, *J* = 8.0 Hz, 2H), 7.47 – 7.38 (m, 3H), 7.28 – 7.19 (m, 2H), 7.09 – 7.04 (d, *J* = 8.0 Hz, 2H), 6.96 – 6.88 (m, 3H), 6.87 – 6.80 (d, *J* = 8.0 Hz, 2H), 6.79 – 6.70 (m, 2H), 6.60 – 6.41 (m, 2H), 5.17 – 4.94 (dd, *J* = 15.5, 7.0 Hz, 1H), 4.48 – 4.28 (dd, *J* = 15.5, 10.0 Hz, 1H), 2.31 (s, 3H), 2.17 (s, 3H). <sup>13</sup>C NMR (CDCl<sub>3</sub>, 125 MHz):  $\delta = 168.1, 146.5, 145.7, 141.8, 141.1, 138.3, 134.9, 133.4, 133.1, 123.0, 129.9, 129.4, 129.3, 129.1, 129.0, 128.9, 127.0, 126.6, 126.2, 126.0, 123.7, 120.1, 69.7, 49.0, 21.6, 21.1$ . IR (film)  $\nu_{\max} = 2922, 1661, 1615, 1598, 1510, 1387, 1275, 1261, 1165, 1087, 764, 750$ . HRMS (ESI, *m/z*) calcd for C<sub>32</sub>H<sub>29</sub>N<sub>4</sub>O<sub>3</sub>S [M+H]<sup>+</sup>: 549.1955, found: 549.1953. The *ee* value was determined by the chiral HPLC analysis (CHIRALPAK AD-H, *n*-hexane/2-propanol = 60 : 40,  $\nu = 1.0$  mL/min,  $\lambda = 254.0$  nm;  $t_{\text{major}} = 12.8$  min,  $t_{\text{minor}} = 22.8$  min).

**(R, Z)-1-(3,5-dimethylphenyl)-3-phenyl-6-tosyl-1,5,6,13b-tetrahydro-2H-[1,2,4]triazocino[2,3-c]quinazolin-2-one**

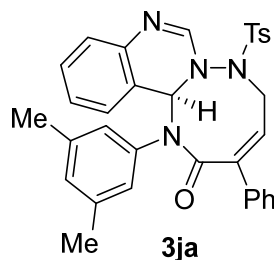

white solid, 53.3 mg, 95%, Mp: 214 – 216 °C, 91% *ee*,  $[\alpha]_D^{25} = 56.0$  (*c* 0.5, CH<sub>2</sub>Cl<sub>2</sub>). <sup>1</sup>H NMR (500 MHz, CDCl<sub>3</sub>):  $\delta = 7.61 - 7.55$  (d, *J* = 7.0 Hz, 2H), 7.53 – 7.47 (d, *J* = 8.0 Hz, 2H), 7.47 – 7.38 (m, 3H), 7.27 – 7.19 (m, 2H), 7.10 – 7.03 (d, *J* = 8.0 Hz, 2H), 6.96 – 6.89 (d, *J* = 8.0 Hz, 2H), 6.88 – 6.83 (d, *J* = 1.5 Hz, 1H), 6.80 – 6.70 (m, 3H), 6.38 – 6.05 (m, 2H), 5.16 – 4.95 (dd, *J* = 15.0, 7.0 Hz, 1H), 4.48 – 4.27 (dd, *J* = 15.0, 10.0 Hz, 1H), 2.30 (s, 3H), 2.04 (s, 6H). <sup>13</sup>C NMR (CDCl<sub>3</sub>, 125 MHz):  $\delta = 167.9, 146.4, 145.7, 141.8, 141.1, 138.1, 135.7, 135.0, 133.1, 130.1, 130.0, 129.8, 129.3, 129.0, 128.9, 127.1, 126.7, 126.1, 125.9, 123.7, 120.0, 69.8, 49.0, 21.6, 20.9$ . IR (film)  $\nu_{\max} = 2922, 2852, 1662, 1597, 1389, 1358, 1164, 1089, 815, 765$ . HRMS (ESI, *m/z*) calcd for C<sub>33</sub>H<sub>31</sub>N<sub>4</sub>O<sub>3</sub>S [M+H]<sup>+</sup>: 563.2111, found: 563.2114. The *ee* value was determined by the chiral HPLC analysis (CHIRALPAK AD-H, *n*-hexane/2-propanol = 60 : 40,  $\nu = 1.0$  mL/min,  $\lambda = 254.0$  nm;  $t_{\text{major}} = 5.7$  min,  $t_{\text{minor}} = 12.8$  min).

**(R, Z)-1-(3-methoxyphenyl)-3-phenyl-6-tosyl-1,5,6,13b-tetrahydro-2H-[1,2,4]triazocino[2,3-c]quinazolin-2-one**

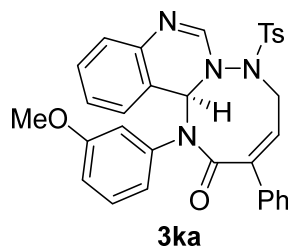

colorless oil, 49.9 mg, 88%, 93% *ee*,  $[\alpha]_D^{25} = 88.0$  (*c* 0.5, CH<sub>2</sub>Cl<sub>2</sub>). <sup>1</sup>H NMR (500 MHz, CDCl<sub>3</sub>):  $\delta = 7.61 - 7.55$  (m, 2H), 7.52 – 7.48 (d, *J* = 8.0 Hz, 2H), 7.47 – 7.40 (m, 3H), 7.29 – 7.20 (m, 2H), 7.11 – 7.06 (d, *J* = 8.0 Hz, 2H), 7.02 – 6.92 (m, 3H), 6.87 (s, 1H), 6.83 – 6.80 (d, *J* = 1.5 Hz, 1H), 6.80 – 6.74 (dd, *J* = 10.0, 7.0 Hz, 1H), 6.70 – 6.64 (dd, *J* = 8.5, 2.5 Hz, 1H), 6.35 (s, 1H), 6.07 (s, 1H), 5.18 – 4.93 (dd, *J* = 15.0, 7.0 Hz, 1H), 4.44 – 4.24 (dd, *J* = 15.0, 10.0 Hz, 1H), 3.51 (s, 3H), 2.32 (s, 3H). <sup>13</sup>C NMR (CDCl<sub>3</sub>, 125 MHz):  $\delta = 167.9, 159.4, 146.5, 145.8, 141.7, 141.2, 137.1, 134.9, 133.0, 130.0, 129.4, 129.3, 129.0, 128.9, 127.1, 126.7, 126.2, 126.1, 123.9, 121.8, 119.9, 115.2, 114.6, 69.8, 55.2, 49.0, 21.7$ . IR (film)  $\nu_{\max} = 2923, 1662, 1614, 1598, 1490, 1389, 1229, 1163, 1088, 1037, 765, 706$ . HRMS (ESI, *m/z*) calcd for C<sub>32</sub>H<sub>29</sub>N<sub>4</sub>O<sub>4</sub>S [M+H]<sup>+</sup>: 565.1904, found: 565.1906. The *ee* value was determined by the chiral HPLC analysis (CHIRALPAK AD-H, *n*-hexane/2-propanol = 60 : 40,  $\nu = 1.0$  mL/min,  $\lambda = 254.0$  nm;  $t_{\text{major}} = 8.9$  min,  $t_{\text{minor}} = 18.2$  min).

**(R, Z)-1-(4-methoxyphenyl)-3-phenyl-6-tosyl-1,5,6,13b-tetrahydro-2H-[1,2,4]triazocino[2,3-c]quinazolin-2-one**

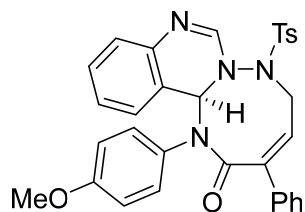

**3la**

yellow oil, 48.6 mg, 86%, 90% *ee*,  $[\alpha]_D^{25} = 40.0$  (*c* 1.0, CH<sub>2</sub>Cl<sub>2</sub>). <sup>1</sup>H NMR (500 MHz, CDCl<sub>3</sub>):  $\delta = 7.59 - 7.53$  (m, 2H), 7.52 – 7.47 (d, *J* = 8.0 Hz, 2H), 7.47 – 7.39 (m, 3H), 7.28 – 7.19 (m, 2H), 7.09 – 7.04 (d, *J* = 8.5 Hz, 2H), 6.98 – 6.93 (dd, *J* = 7.5, 1.5 Hz, 1H), 6.92 – 6.87 (m, 2H), 6.78 – 6.71 (m, 2H), 6.56 (s, 4H), 5.15 – 4.96 (dd, *J* = 15.0, 7.0 Hz, 1H), 4.39 – 4.29 (dd, *J* = 15.0, 10.0 Hz, 1H), 3.65 (s, 3H), 2.31 (s, 3H). <sup>13</sup>C NMR (CDCl<sub>3</sub>, 125 MHz):  $\delta = 168.2, 159.2, 146.5, 145.7, 141.9, 141.0, 134.9, 133.1, 130.4, 130.0, 129.9, 129.3, 129.0, 128.9, 128.5, 126.9, 126.6, 126.2, 126.0, 123.7, 120.0, 114.0, 69.7, 55.2, 49.1, 21.6$ . IR (film)  $\nu_{\max} = 2924, 1661, 1614, 1598, 1510, 1389, 1357, 1243, 1164, 1087, 809, 764$ . HRMS (ESI, *m/z*) calcd for C<sub>32</sub>H<sub>29</sub>N<sub>4</sub>O<sub>4</sub>S [M+H]<sup>+</sup>: 565.1904, found: 565.1902. The *ee* value was determined by the chiral HPLC analysis (CHIRALPAK AD-H, *n*-hexane/2-propanol = 60 : 40,  $\nu = 1.0$  mL/min,  $\lambda = 254.0$  nm;  $t_{\text{major}} = 18.7$  min,  $t_{\text{minor}} = 35.1$  min).

**(R, Z)-3-phenyl-6-tosyl-1-(4-(trifluoromethoxy)phenyl)-1,5,6,13b-tetrahydro-2H-[1,2,4]triazocino[2,3-c]quinazolin-2-one**

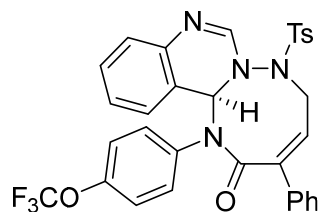

**3ma**

colorless oil, 40.2 mg, 65%, 90% *ee*,  $[\alpha]_D^{25} = 160.0$  (*c* 0.5, CH<sub>2</sub>Cl<sub>2</sub>). <sup>1</sup>H NMR (500 MHz, CDCl<sub>3</sub>):  $\delta = 7.60 - 7.55$  (m, 2H), 7.52 – 7.41 (m, 5H), 7.29 – 7.21 (m, 2H), 7.12 – 7.06 (d, *J* = 8.0 Hz, 2H), 6.97 – 6.91 (m, 2H), 6.91 – 6.84 (m, 4H), 6.83 – 6.78 (dd, *J* = 10.0, 7.0 Hz, 1H), 6.75 – 6.62 (m, 2H), 5.13 – 5.04 (dd, *J* = 15.0, 6.5 Hz, 1H), 4.36 – 4.26 (dd, *J* = 15.0, 10.0 Hz, 1H), 2.33 (s, 3H). <sup>13</sup>C NMR (CDCl<sub>3</sub>, 125 MHz):  $\delta = 168.1, 148.8, 146.3, 145.9, 141.4, 140.9, 134.7, 132.8, 131.0, 130.2, 130.0, 129.5, 129.1, 128.8, 126.9, 126.6, 126.5, 126.1, 124.1, 120.9, 120.2$  (q, *J* = 256.5 Hz), 119.6, 69.8, 49.1, 21.7. <sup>19</sup>F NMR (CDCl<sub>3</sub>, 470 MHz):  $\delta = -57.9$ . IR (film)  $\nu_{\max} = 2924, 1666, 1615, 1598, 1507, 1260, 1165, 1087, 764, 704$ . HRMS (ESI, *m/z*) calcd for C<sub>32</sub>H<sub>26</sub>F<sub>3</sub>N<sub>4</sub>O<sub>4</sub>S [M+H]<sup>+</sup>: 619.1621, found: 619.1619. The *ee* value was determined by the chiral HPLC analysis (CHIRALPAK AD-H, *n*-hexane/2-propanol = 60 : 40,  $\nu = 1.0$  mL/min,  $\lambda = 254.0$  nm;  $t_{\text{major}} = 8.1$  min,  $t_{\text{minor}} = 11.1$  min).

**(R, Z)-3-(2-fluorophenyl)-1-(3-methoxyphenyl)-6-tosyl-1,5,6,13b-tetrahydro-2H-[1,2,4]triazocino[2,3-c]quinazolin-2-one**

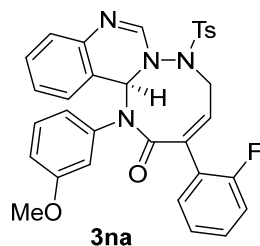

yellow oil, 35.2 mg, 60%, 96% *ee*,  $[\alpha]_D^{25} = -32.0$  (*c* 0.5, CH<sub>2</sub>Cl<sub>2</sub>). <sup>1</sup>H NMR (500 MHz, CDCl<sub>3</sub>):  $\delta = 7.53 - 7.36$  (m, 4H), 7.30 – 7.20 (m, 3H), 7.18 – 7.10 (m, 2H), 7.03 – 6.92 (m, 5H), 6.82 – 6.77 (d, *J* = 2.0 Hz, 1H), 6.76 – 6.69 (dd, *J* = 9.5, 7.0 Hz, 1H), 6.67 – 6.60 (dd, *J* = 8.5, 2.5 Hz, 1H), 6.41 – 6.33 (d, *J* = 7.5 Hz, 1H), 6.14 (s, 1H), 5.08 – 4.99 (dd, *J* = 15.0, 7.0 Hz, 1H), 4.43 – 4.30 (dd, *J* = 15.0, 10.0 Hz, 1H), 3.52 (s, 3H), 2.31 (s, 3H). <sup>13</sup>C NMR (CDCl<sub>3</sub>, 125 MHz):  $\delta = 167.0, 159.9$  (d, *J* = 245.1 Hz), 159.2, 146.5, 145.8, 141.0, 138.2, 137.5, 132.9, 131.1 (d, *J* = 8.5 Hz), 130.3 (d, *J* = 3.3 Hz), 129.9, 129.9, 129.1, 128.9, 127.9, 127.3 (d, *J* = 5.4 Hz), 126.2, 126.0, 125.1 (d, *J* = 3.1 Hz), 124.8 (d, *J* = 13.1 Hz), 121.6, 120.1, 115.5 (d, *J* = 21.1 Hz), 115.0, 114.6, 69.4, 55.2, 48.6, 21.6. <sup>19</sup>F NMR (CDCl<sub>3</sub>, 470 MHz):  $\delta = -114.3$ . IR (film)  $\nu_{\max} = 2922, 1661, 1599, 1574, 1488, 1394, 1261, 1165, 764, 750$ . HRMS (ESI, *m/z*) calcd for C<sub>32</sub>H<sub>28</sub>FN<sub>4</sub>O<sub>4</sub>S [M+H]<sup>+</sup>: 583.181, found: 583.1813. The *ee* value was determined by the chiral HPLC analysis (CHIRALPAK IA, *n*-hexane/2-propanol = 50 : 50,  $\nu = 1.0$  mL/min,  $\lambda = 254.0$  nm;  $t_{\text{major}} = 8.3$  min,  $t_{\text{minor}} = 19.7$  min).

**(R, Z)-3-(4-fluorophenyl)-1-(3-methoxyphenyl)-6-tosyl-1,5,6,13b-tetrahydro-2H-[1,2,4]triazocino[2,3-c]quinazolin-2-one**

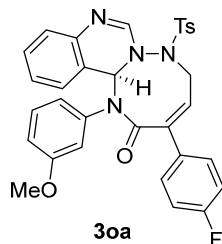

yellow oil, 55.1 mg, 95%, 93% *ee*,  $[\alpha]_D^{25} = 96.0$  (*c* 0.5, CH<sub>2</sub>Cl<sub>2</sub>). <sup>1</sup>H NMR (500 MHz, CDCl<sub>3</sub>):  $\delta = 7.64 - 7.57$  (m, 2H), 7.53 – 7.46 (d, *J* = 8.0 Hz, 2H), 7.29 – 7.20 (m, 2H), 7.17 – 7.07 (m, 4H), 7.01 – 6.91 (m, 3H), 6.89 – 6.85 (d, *J* = 1.5 Hz, 1H), 6.85 – 6.78 (d, *J* = 2.0 Hz, 1H), 6.76 – 6.70 (dd, *J* = 10.0, 7.0 Hz, 1H), 6.69 – 6.64 (dd, *J* = 8.5, 2.5 Hz, 1H), 6.34 (s, 1H), 6.06 (s, 1H), 5.08 – 5.01 (dd, *J* = 15.0, 6.5 Hz, 1H), 4.39 – 4.29 (dd, *J* = 15.0, 10.0 Hz, 1H), 3.50 (s, 3H), 2.33 (s, 3H). <sup>13</sup>C NMR (CDCl<sub>3</sub>, 125 MHz):  $\delta = 167.7, 163.4$  (d, *J* = 248.3 Hz), 159.4, 146.4, 145.9, 141.1, 140.5, 137.0, 132.9, 131.1 (d, *J* = 3.3 Hz), 130.0, 130.0, 129.3, 128.9, 128.7, 128.6, 127.1, 126.2, 126.1, 124.0, 121.7, 119.8, 116.1, 115.9, 115.2, 114.6, 69.8, 55.2, 48.9, 21.7. <sup>19</sup>F NMR (CDCl<sub>3</sub>, 470 MHz):  $\delta = -111.6$ . IR (film)  $\nu_{\max} = 2922, 1661, 1599, 1508, 1387, 1231, 1163, 1088, 764, 750$ . HRMS (ESI, *m/z*) calcd for C<sub>32</sub>H<sub>28</sub>FN<sub>4</sub>O<sub>4</sub>S [M+H]<sup>+</sup>: 583.181, found: 583.1808. The *ee* value was determined by the chiral HPLC analysis (CHIRALPAK IA, *n*-hexane/2-propanol = 50 : 50,  $\nu = 1.0$  mL/min,  $\lambda = 254.0$  nm;  $t_{\text{major}} = 9.9$  min,  $t_{\text{minor}} = 19.0$  min).

**(R, Z)-3-(3-chlorophenyl)-1-(3-methoxyphenyl)-6-tosyl-1,5,6,13b-tetrahydro-2H-[1,2,4]triazocino[2,3-c]quinazolin-2-one**

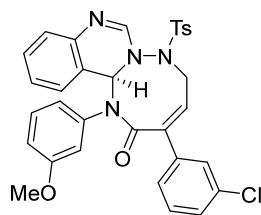

**3pa**

yellow oil, 54.2 mg, 91%, 92% *ee*,  $[\alpha]_D^{25} = 96.0$  (*c* 0.5, CH<sub>2</sub>Cl<sub>2</sub>). <sup>1</sup>H NMR (500 MHz, CDCl<sub>3</sub>):  $\delta = 7.58 - 7.55$  (m, 1H), 7.54 – 7.48 (m, 3H), 7.42 – 7.34 (m, 2H), 7.30 – 7.23 (m, 2H), 7.16 – 7.11 (d, *J* = 8.0 Hz, 2H), 7.03 – 6.92 (m, 3H), 6.90 – 6.86 (d, *J* = 1.5 Hz, 1H), 6.82 – 6.74 (m, 2H), 6.71 – 6.65 (dd, *J* = 8.0, 2.5 Hz, 1H), 6.33 (s, 1H), 6.06 (s, 1H), 5.12 – 5.03 (dd, *J* = 15.0, 7.0 Hz, 1H), 4.40 – 4.29 (dd, *J* = 15.0, 10.0 Hz, 1H), 3.52 (s, 3H), 2.35 (s, 3H). <sup>13</sup>C NMR (CDCl<sub>3</sub>, 125 MHz):  $\delta = 167.2, 159.4, 146.4, 146.0, 141.1, 140.4, 136.9, 136.7, 135.0, 133.0, 130.3, 130.1, 129.4, 129.3, 128.9, 127.1, 126.6, 126.3, 126.1, 125.4, 125.0, 121.7, 119.8, 115.2, 114.7, 69.76, 55.2, 48.8, 21.7$ . IR (film)  $\nu_{\max} = 2921, 2851, 1661, 1615, 1598, 1387, 1276, 1261, 1164, 764, 751$ . HRMS (ESI, *m/z*) calcd for C<sub>32</sub>H<sub>28</sub><sup>35</sup>ClN<sub>4</sub>O<sub>4</sub>S [M+H]<sup>+</sup>: 599.1514, found: 599.1518. The *ee* value was determined by the chiral HPLC analysis (CHIRALPAK IA, *n*-hexane/2-propanol = 50 : 50,  $\nu = 1.0$  mL/min,  $\lambda = 254.0$  nm;  $t_{\text{major}} = 8.8$  min,  $t_{\text{minor}} = 15.5$  min).

**(R, Z)-3-(4-chlorophenyl)-1-(3-methoxyphenyl)-6-tosyl-1,5,6,13b-tetrahydro-2H-[1,2,4]triazocino[2,3-c]quinazolin-2-one**

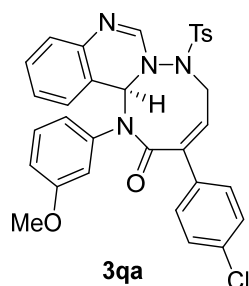

**3qa**

yellow solid, 51.5 mg, 86%, Mp: 115 – 117 °C, 96% *ee*,  $[\alpha]_D^{25} = 112.0$  (*c* 0.5, CH<sub>2</sub>Cl<sub>2</sub>). <sup>1</sup>H NMR (500 MHz, CDCl<sub>3</sub>):  $\delta = 7.59 - 7.54$  (m, 2H), 7.52 – 7.48 (m, 2H), 7.45 – 7.39 (m, 2H), 7.29 – 7.21 (m, 2H), 7.14 – 7.09 (d, *J* = 8.0 Hz, 2H), 7.02 – 6.92 (m, 3H), 6.89 – 6.86 (d, *J* = 1.5 Hz, 1H), 6.83 – 6.75 (m, 2H), 6.70 – 6.65 (dd, *J* = 8.5, 2.5 Hz, 1H), 6.33 (s, 1H), 6.05 (s, 1H), 5.10 – 5.02 (dd, *J* = 15.0, 7.0 Hz, 1H), 4.39 – 4.31 (dd, *J* = 15.0, 10.0 Hz, 1H), 3.51 (s, 3H), 2.34 (s, 3H). <sup>13</sup>C NMR (CDCl<sub>3</sub>, 125 MHz):  $\delta = 167.5, 159.4, 146.4, 145.9, 141.1, 140.5, 137.0, 135.5, 133.3, 132.8, 130.0, 129.3, 129.2, 128.9, 128.04, 127.1, 126.3, 126.1, 124.6, 121.7, 119.8, 115.2, 114.6, 69.8, 55.2, 48.9, 21.7$ . IR (film)  $\nu_{\max} = 2922, 2851, 1662, 1615, 1598, 1491, 1387, 1356, 1231, 1163, 763$ . HRMS (ESI, *m/z*) calcd for C<sub>32</sub>H<sub>28</sub><sup>35</sup>ClN<sub>4</sub>O<sub>4</sub>S [M+H]<sup>+</sup>: 599.1514, found: 599.1509. The *ee* value was determined by the chiral HPLC analysis (CHIRALPAK IA, *n*-hexane/2-propanol = 50 : 50,  $\nu = 1.0$  mL/min,  $\lambda = 254.0$  nm;  $t_{\text{major}} = 13.6$  min,  $t_{\text{minor}} = 26.2$  min).

**(R, Z)-3-(3,4-dichlorophenyl)-1-(3-methoxyphenyl)-6-tosyl-1,5,6,13b-tetrahydro-2H-[1,2,4]triazocino[2,3-c]quinazolin-2-one**

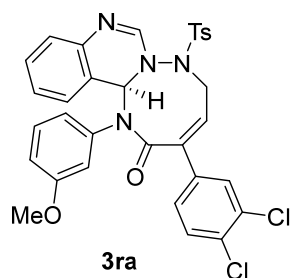

yellow oil, 57.3 mg, 91%, 95% *ee*,  $[\alpha]_D^{25} = 160.0$  (*c* 0.5, CH<sub>2</sub>Cl<sub>2</sub>). <sup>1</sup>H NMR (500 MHz, CDCl<sub>3</sub>):  $\delta = 7.75 - 7.66$  (d, *J* = 1.5 Hz, 1H), 7.56 – 7.45 (m, 4H), 7.31 – 7.22 (m, 2H), 7.20 – 7.11 (d, *J* = 8.0 Hz, 2H), 7.05 – 6.91 (m, 3H), 6.88 – 6.81 (m, 2H), 6.80 – 6.74 (dd, *J* = 10.0, 7.0 Hz, 1H), 6.72 – 6.62 (dd, *J* = 8.5, 2.5 Hz, 1H), 6.32 (s, 1H), 6.04 (s, 1H), 5.11 – 5.02 (dd, *J* = 15.0, 7.0 Hz, 1H), 4.40 – 4.29 (dd, *J* = 15.0, 10.0 Hz, 1H), 3.51 (s, 3H), 2.37 (s, 3H). <sup>13</sup>C NMR (CDCl<sub>3</sub>, 125 MHz):  $\delta = 166.9, 159.4, 146.4, 146.1, 141.1, 139.5, 136.8, 134.9, 133.6, 133.2, 132.8, 130.9, 130.1, 129.3, 128.8, 128.5, 127.1, 126.3, 126.2, 125.9, 121.6, 119.6, 115.1, 114.7, 69.8, 55.2, 48.7, 21.7$ . IR (film)  $\nu_{\max} = 2920, 1661, 1599, 1574, 1489, 1375, 1275, 1261, 1164, 764, 750$ . HRMS (ESI, *m/z*) calcd for C<sub>32</sub>H<sub>27</sub><sup>35</sup>Cl<sub>2</sub>N<sub>4</sub>O<sub>4</sub>S [M+H]<sup>+</sup>: 633.1125, found: 633.1123. The *ee* value was determined by the chiral HPLC analysis (CHIRALPAK IA, *n*-hexane/2-propanol = 70 : 30,  $\nu = 1.0$  mL/min,  $\lambda = 254.0$  nm;  $t_{\text{major}} = 23.8$  min,  $t_{\text{minor}} = 28.6$  min).

**(R, Z)-3-(3-bromophenyl)-1-(3-methoxyphenyl)-6-tosyl-1,5,6,13b-tetrahydro-2H-[1,2,4]triazocino[2,3-c]quinazolin-2-one**

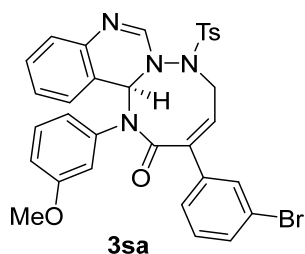

yellow oil, 53.4 mg, 83%, 94% *ee*,  $[\alpha]_D^{25} = 104.0$  (*c* 0.5, CH<sub>2</sub>Cl<sub>2</sub>). <sup>1</sup>H NMR (500 MHz, CDCl<sub>3</sub>):  $\delta = 7.75 - 7.70$  (m, 1H), 7.58 – 7.54 (dd, *J* = 8.0, 2.0 Hz, 2H), 7.53 – 7.49 (d, *J* = 8.5 Hz, 2H), 7.34 – 7.22 (m, 3H), 7.17 – 7.10 (d, *J* = 8.5 Hz, 2H), 7.03 – 6.92 (m, 3H), 6.91 – 6.87 (d, *J* = 1.5 Hz, 1H), 6.80 – 6.73 (m, 2H), 6.71 – 6.66 (dd, *J* = 8.5, 3.0 Hz, 1H), 6.33 (s, 1H), 6.05 (s, 1H), 5.11 – 5.03 (dd, *J* = 15.5, 7.0 Hz, 1H), 4.39 – 4.29 (dd, *J* = 15.5, 10.0 Hz, 1H), 3.52 (s, 3H), 2.36 (s, 3H). <sup>13</sup>C NMR (CDCl<sub>3</sub>, 125 MHz):  $\delta = 167.2, 159.4, 146.4, 146.0, 141.1, 140.3, 137.0, 136.9, 132.9, 132.3, 130.5, 130.1, 129.5, 129.3, 128.9, 127.1, 126.3, 126.1, 125.5, 125.5, 123.1, 121.7, 119.7, 115.2, 114.7, 69.8, 55.2, 48.8, 21.7$ . IR (film)  $\nu_{\max} = 2920, 1661, 1598, 1489, 1387, 1276, 1261, 1164, 1088, 764, 750$ . HRMS (ESI, *m/z*) calcd for C<sub>32</sub>H<sub>28</sub><sup>79</sup>BrN<sub>4</sub>O<sub>4</sub>S [M+H]<sup>+</sup>: 643.1009, found: 643.1004. The *ee* value was determined by the chiral HPLC analysis (CHIRALPAK IA, *n*-hexane/2-propanol = 50 : 50,  $\nu = 1.0$  mL/min,  $\lambda = 254.0$  nm;  $t_{\text{major}} = 9.4$  min,  $t_{\text{minor}} = 17.1$  min).



**(R, Z)-3-(4-bromophenyl)-1-(3-methoxyphenyl)-6-tosyl-1,5,6,13b-tetrahydro-2H-[1,2,4]triazocino[2,3-c]quinazolin-2-one**

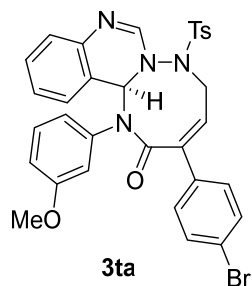

yellow oil, 59.9 mg, 93%, 94% *ee*,  $[\alpha]_{\text{D}}^{25} = 152.0$  (*c* 0.5, CH<sub>2</sub>Cl<sub>2</sub>). <sup>1</sup>H NMR (500 MHz, CDCl<sub>3</sub>):  $\delta = 7.62 - 7.55$  (m, 2H), 7.54 – 7.45 (m, 4H), 7.30 – 7.21 (m, 2H), 7.15 – 7.08 (d, *J* = 8.0 Hz, 2H), 7.02 – 6.92 (m, 3H), 6.89 – 6.85 (d, *J* = 2.0 Hz, 1H), 6.83 – 6.76 (m, 2H), 6.70 – 6.64 (dd, *J* = 8.5, 2.5 Hz, 1H), 6.32 (s, 1H), 6.05 (s, 1H), 5.10 – 5.01 (dd, *J* = 15.5, 7.0 Hz, 1H), 4.39 – 4.30 (dd, *J* = 15.5, 10.0 Hz, 1H), 3.51 (s, 3H), 2.35 (s, 3H). <sup>13</sup>C NMR (CDCl<sub>3</sub>, 125 MHz):  $\delta = 167.5, 159.4, 146.4, 145.9, 141.1, 140.6, 137.0, 133.8, 132.8, 132.2, 130.0, 129.3, 128.9, 128.3, 127.1, 126.3, 126.1, 124.7, 123.7, 121.7, 119.8, 115.2, 114.6, 69.8, 55.2, 48.9, 21.7$ . IR (film)  $\nu_{\text{max}} = 2923, 1660, 1598, 1573, 1489, 1386, 1260, 1163, 1087, 764$ . HRMS (ESI, *m/z*) calcd for C<sub>32</sub>H<sub>28</sub><sup>79</sup>BrN<sub>4</sub>O<sub>4</sub>S [M+H]<sup>+</sup>: 643.1009, found: 643.1004. The *ee* value was determined by the chiral HPLC analysis (CHIRALPAK IA, *n*-hexane/2-propanol = 50 : 50,  $\nu = 1.0$  mL/min,  $\lambda = 254.0$  nm;  $t_{\text{major}} = 15.3$  min,  $t_{\text{minor}} = 28.3$  min).

**(R, Z)-1-(3-methoxyphenyl)-3-(*m*-tolyl)-6-tosyl-1,5,6,13b-tetrahydro-2H-[1,2,4]triazocino[2,3-c]quinazolin-2-one**

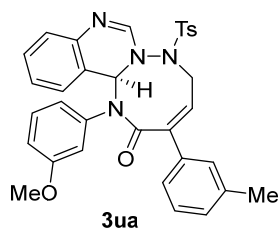

yellow oil, 51.6 mg, 89%, 92% *ee*,  $[\alpha]_{\text{D}}^{25} = 72.0$  (*c* 1.0, CH<sub>2</sub>Cl<sub>2</sub>). <sup>1</sup>H NMR (500 MHz, CDCl<sub>3</sub>):  $\delta = 7.53 - 7.48$  (d, *J* = 8.5 Hz, 2H), 7.43 – 7.40 (d, *J* = 1.0 Hz, 1H), 7.38 – 7.31 (m, 2H), 7.29 – 7.21 (m, 3H), 7.11 – 7.06 (d, *J* = 8.0 Hz, 2H), 7.01 – 6.93 (m, 3H), 6.88 – 6.85 (d, *J* = 1.5 Hz, 1H), 6.85 – 6.81 (d, *J* = 2.0 Hz, 1H), 6.79 – 6.72 (dd, *J* = 10.5, 7.0 Hz, 1H), 6.70 – 6.65 (dd, *J* = 8.5, 2.5 Hz, 1H), 6.35 (s, 1H), 6.07 (s, 1H), 5.10 – 5.03 (dd, *J* = 15.0, 6.5 Hz, 1H), 4.41 – 4.30 (dd, *J* = 15.0, 10.0 Hz, 1H), 3.52 (s, 3H), 2.43 (s, 3H), 2.33 (s, 3H). <sup>13</sup>C NMR (CDCl<sub>3</sub>, 125 MHz):  $\delta = 168.0, 159.4, 146.5, 145.7, 141.8, 141.2, 138.7, 137.1, 134.8, 133.0, 130.2, 130.0, 130.0, 129.3, 128.9, 127.2, 127.1, 126.2, 126.0, 123.9, 123.7, 121.8, 120.0, 115.2, 114.5, 69.8, 55.2, 49.0, 21.7, 21.6$ . IR (film)  $\nu_{\text{max}} = 2922, 1663, 1614, 1598, 1490, 1387, 1235, 1163, 1088, 765, 707$ . HRMS (ESI, *m/z*) calcd for C<sub>33</sub>H<sub>31</sub>N<sub>4</sub>O<sub>4</sub>S [M+H]<sup>+</sup>: 579.2061, found: 579.2065. The *ee* value was determined by the chiral HPLC analysis (CHIRALPAK IA, *n*-hexane/2-propanol = 50 : 50,  $\nu = 1.0$  mL/min,  $\lambda = 254.0$  nm;  $t_{\text{major}} = 7.9$  min,  $t_{\text{minor}} = 16.2$  min).

**(R, Z)-1-(3-methoxyphenyl)-3-(*p*-tolyl)-6-tosyl-1,5,6,13b-tetrahydro-2*H*-[1,2,4]triazocino[2,3-*c*]quinazolin-2-one**

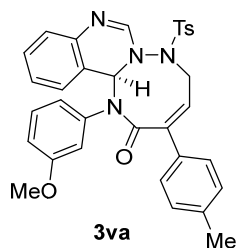

yellow oil, 53.5 mg, 93%, 93% *ee*,  $[\alpha]_D^{25} = 104.0$  (*c* 0.5, CH<sub>2</sub>Cl<sub>2</sub>). <sup>1</sup>H NMR (500 MHz, CDCl<sub>3</sub>):  $\delta = 7.53 - 7.44$  (dd, *J* = 11.5, 8.5 Hz, 4H), 7.29 – 7.20 (m, 4H), 7.11 – 7.05 (d, *J* = 8.0 Hz, 2H), 7.02 – 6.90 (m, 3H), 6.88 – 6.85 (d, *J* = 1.5 Hz, 1H), 6.83 – 6.79 (d, *J* = 2.0 Hz, 1H), 6.76 – 6.70 (dd, *J* = 10.5, 7.0 Hz, 1H), 6.70 – 6.64 (m, 1H), 6.34 (s, 1H), 6.06 (s, 1H), 5.11 – 5.01 (dd, *J* = 15.0, 6.5 Hz, 1H), 4.40 – 4.30 (dd, *J* = 15.0, 10.0 Hz, 1H), 3.51 (s, 3H), 2.41 (s, 3H), 2.32 (s, 3H). <sup>13</sup>C NMR (CDCl<sub>3</sub>, 125 MHz):  $\delta = 168.1, 159.4, 146.6, 145.7, 141.6, 141.2, 139.5, 137.2, 133.1, 132.0, 130.0, 129.9, 129.7, 129.3, 128.9, 127.1, 126.5, 126.1, 126.0, 122.8, 121.8, 120.0, 115.2, 114.6, 69.7, 55.2, 49.1, 21.6, 21.3$ . IR (film)  $\nu_{\max} = 2922, 1663, 1614, 1598, 1387, 1231, 1163, 1088, 764, 706$ . HRMS (ESI, *m/z*) calcd for C<sub>33</sub>H<sub>31</sub>N<sub>4</sub>O<sub>4</sub>S [M+H]<sup>+</sup>: 579.2061, found: 579.2063. The *ee* value was determined by the chiral HPLC analysis (CHIRALPAK IA, *n*-hexane/2-propanol = 50 : 50,  $\nu = 1.0$  mL/min,  $\lambda = 254.0$  nm;  $t_{\text{major}} = 13.5$  min,  $t_{\text{minor}} = 42.9$  min).

**(R, Z)-3-(4-isopropylphenyl)-1-(3-methoxyphenyl)-6-tosyl-1,5,6,13b-tetrahydro-2*H*-[1,2,4]triazocino[2,3-*c*]quinazolin-2-one**

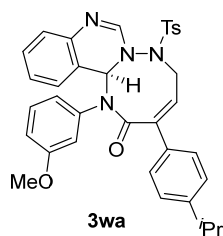

white solid, 51.4 mg, 85%, Mp: 212 – 214 °C, 90% *ee*,  $[\alpha]_D^{25} = 96.0$  (*c* 0.5, CH<sub>2</sub>Cl<sub>2</sub>). <sup>1</sup>H NMR (500 MHz, CDCl<sub>3</sub>):  $\delta = 7.54 - 7.45$  (m, 4H), 7.34 – 7.29 (d, *J* = 8.5 Hz, 2H), 7.29 – 7.21 (m, 2H), 7.10 – 7.03 (d, *J* = 8.5 Hz, 2H), 7.01 – 6.92 (m, 3H), 6.89 – 6.84 (d, *J* = 2.0 Hz, 1H), 6.82 – 6.78 (d, *J* = 2.0 Hz, 1H), 6.78 – 6.71 (dd, *J* = 10.0, 6.5 Hz, 1H), 6.70 – 6.64 (m, 1H), 6.35 (s, 1H), 6.07 (s, 1H), 5.10 – 5.00 (dd, *J* = 15.5, 7.0 Hz, 1H), 4.40 – 4.30 (dd, *J* = 15.5, 10.0 Hz, 1H), 3.51 (s, 3H), 3.02 – 2.92 (m, 1H), 2.31 (s, 3H), 1.34 – 1.26 (dd, *J* = 6.5, 1.5 Hz, 6H). <sup>13</sup>C NMR (CDCl<sub>3</sub>, 125 MHz):  $\delta = 168.1, 159.4, 150.3, 146.6, 145.7, 141.6, 141.2, 137.2, 133.1, 132.4, 130.0, 129.9, 129.2, 128.9, 127.1, 127.1, 126.6, 126.1, 126.0, 122.8, 121.8, 120.0, 115.2, 114.6, 69.8, 55.2, 49.1, 34.0, 23.9, 21.6$ . IR (film)  $\nu_{\max} = 2960, 1667, 1598, 1387, 1362, 1275, 1261, 1164, 1088, 764, 750$ . HRMS (ESI, *m/z*) calcd for C<sub>35</sub>H<sub>35</sub>N<sub>4</sub>O<sub>4</sub>S [M+H]<sup>+</sup>: 607.2374, found: 607.2375. The *ee* value was determined by the chiral HPLC analysis (CHIRALPAK IA, *n*-hexane/2-propanol = 50 : 50,  $\nu = 1.0$  mL/min,  $\lambda = 254.0$  nm;  $t_{\text{major}} = 14.2$  min,  $t_{\text{minor}} = 32.4$  min).

**(R, Z)-3-(4-cyclohexylphenyl)-1-(3-methoxyphenyl)-6-tosyl-1,5,6,13b-tetrahydro-2H-[1,2,4]triazocino[2,3-c]quinazolin-2-one**

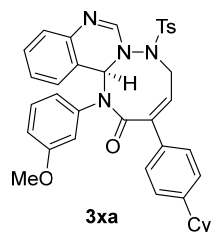

yellow oil, 61.1 mg, 95%, 88% *ee*,  $[\alpha]_D^{25} = 112.0$  (*c* 0.5, CH<sub>2</sub>Cl<sub>2</sub>). <sup>1</sup>H NMR (500 MHz, CDCl<sub>3</sub>):  $\delta = 7.53 - 7.43$  (m, 4H), 7.31 – 7.20 (m, 4H), 7.09 – 7.03 (d, *J* = 8.5 Hz, 2H), 7.02 – 6.92 (m, 3H), 6.89 – 6.85 (d, *J* = 1.5 Hz, 1H), 6.80 – 6.76 (d, *J* = 2.0 Hz, 1H), 6.76 – 6.71 (dd, *J* = 10.5, 7.0 Hz, 1H), 6.70 – 6.63 (dd, *J* = 8.5, 2.5 Hz, 1H), 6.35 (s, 1H), 6.07 (s, 1H), 5.11 – 5.00 (dd, *J* = 15.0, 6.5 Hz, 1H), 4.42 – 4.29 (dd, *J* = 15.0, 10.0 Hz, 1H), 3.51 (s, 3H), 2.63 – 2.50 (m, 1H), 2.30 (s, 3H), 1.96 – 1.83 (m, 4H), 1.81 – 1.74 (m, 1H), 1.52 – 1.38 (m, 4H), 1.33 – 1.25 (m, 1H). <sup>13</sup>C NMR (CDCl<sub>3</sub>, 125 MHz):  $\delta = 168.1, 159.4, 149.5, 146.6, 145.7, 141.6, 141.2, 137.2, 133.1, 132.3, 130.0, 129.9, 129.2, 128.9, 127.5, 127.1, 126.6, 126.1, 126.0, 122.8, 121.8, 120.0, 115.2, 114.6, 69.7, 55.2, 49.1, 44.4, 34.4, 26.9, 26.1, 21.7$ . IR (film)  $\nu_{\max} = 2923, 2851, 1667, 1614, 1598, 1387, 1276, 1261, 1164, 1088, 764, 750$ . HRMS (ESI, *m/z*) calcd for C<sub>38</sub>H<sub>39</sub>N<sub>4</sub>O<sub>4</sub>S [M+H]<sup>+</sup>: 647.2687, found: 647.2691. The *ee* value was determined by the chiral HPLC analysis (CHIRALPAK IA, *n*-hexane/2-propanol = 50 : 50,  $\nu = 1.0$  mL/min,  $\lambda = 254.0$  nm;  $t_{\text{major}} = 27.2$  min,  $t_{\text{minor}} = 66.9$  min).

**(R, Z)-3-(4-(tert-butyl)phenyl)-1-(3-methoxyphenyl)-6-tosyl-1,5,6,13b-tetrahydro-2H-[1,2,4]triazocino[2,3-c]quinazolin-2-one**

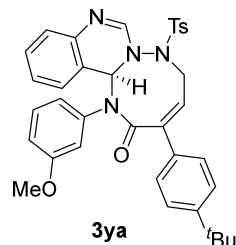

white solid, 51.1 mg, 82%, Mp: 218 – 220 °C, 90% *ee*,  $[\alpha]_D^{25} = 96.0$  (*c* 0.5, CH<sub>2</sub>Cl<sub>2</sub>). <sup>1</sup>H NMR (500 MHz, CDCl<sub>3</sub>):  $\delta = 7.53 - 7.44$  (m, 6H), 7.29 – 7.21 (m, 2H), 7.09 – 7.04 (d, *J* = 8.0 Hz, 2H), 7.01 – 6.93 (m, 3H), 6.88 – 6.84 (m, 1H), 6.83 – 6.79 (d, *J* = 1.5 Hz, 1H), 6.79 – 6.73 (dd, *J* = 10.5, 7.0 Hz, 1H), 6.71 – 6.65 (dd, *J* = 8.5, 2.5 Hz, 1H), 6.36 (s, 1H), 6.07 (s, 1H), 5.10 – 5.01 (dd, *J* = 15.0, 6.5 Hz, 1H), 4.40 – 4.32 (dd, *J* = 15.0, 10.5 Hz, 1H), 3.52 (s, 3H), 2.31 (s, 3H), 1.37 (s, 9H). <sup>13</sup>C NMR (CDCl<sub>3</sub>, 125 MHz):  $\delta = 168.1, 159.4, 152.6, 146.6, 145.7, 141.5, 141.2, 137.2, 133.1, 132.0, 130.0, 129.9, 129.2, 128.9, 127.1, 126.3, 126.1, 126.0, 126.0, 122.9, 121.8, 120.0, 115.2, 114.6, 69.8, 55.2, 49.1, 34.8, 31.3, 21.6$ . IR (film)  $\nu_{\max} = 2961, 1666, 1598, 1387, 1275, 1262, 1232, 1164, 764, 750$ . HRMS (ESI, *m/z*) calcd for C<sub>36</sub>H<sub>37</sub>N<sub>4</sub>O<sub>4</sub>S [M+H]<sup>+</sup>: 621.253, found: 621.2533. The *ee* value was determined by the chiral HPLC analysis (CHIRALPAK IA, *n*-hexane/2-propanol = 60 : 40,  $\nu = 1.0$  mL/min,  $\lambda = 254.0$  nm;  $t_{\text{major}} = 15.1$  min,  $t_{\text{minor}} = 28.9$  min).

**(R, Z)-1-(3-methoxyphenyl)-3-(naphthalen-2-yl)-6-tosyl-1,5,6,13b-tetrahydro-2H-[1,2,4]-triazocino[2,3-c]quinazolin-2-one**

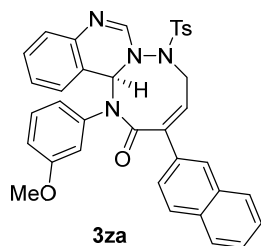

yellow oil, 58.8 mg, 96%, 94% *ee*,  $[\alpha]_D^{25} = 128.0$  (*c* 0.5, CH<sub>2</sub>Cl<sub>2</sub>). <sup>1</sup>H NMR (500 MHz, CDCl<sub>3</sub>):  $\delta = 8.11 - 8.01$  (d, *J* = 2.0 Hz, 1H), 7.97 – 7.83 (m, 3H), 7.76 – 7.68 (dd, *J* = 8.5, 1.5 Hz, 1H), 7.58 – 7.44 (m, 4H), 7.28 – 7.23 (m, 1H), 7.23 – 7.17 (m, 1H), 7.10 – 7.04 (d, *J* = 8.0 Hz, 2H), 7.04 – 6.98 (t, *J* = 8.0 Hz, 1H), 6.98 – 6.86 (m, 5H), 6.71 – 6.66 (dd, *J* = 8.5, 2.5 Hz, 1H), 6.39 (s, 1H), 6.10 (s, 1H), 5.17 – 5.07 (dd, *J* = 15.0, 7.0 Hz, 1H), 4.47 – 4.37 (dd, *J* = 15.0, 10.5 Hz, 1H), 3.52 (s, 3H), 2.25 (s, 3H). <sup>13</sup>C NMR (CDCl<sub>3</sub>, 125 MHz):  $\delta = 168.0, 159.4, 146.6, 145.8, 141.6, 141.1, 137.1, 133.6, 133.4, 133.0, 131.9, 130.0, 129.3, 128.9, 128.8, 128.7, 127.7, 127.1, 127.0, 126.7, 126.6, 126.2, 126.0, 124.1, 123.7, 121.8, 119.9, 115.3, 114.6, 69.8, 55.2, 49.1, 21.6$ . IR (film)  $\nu_{\max} = 3055, 2923, 1661, 1614, 1598, 1391, 1237, 1087, 764, 724$ . HRMS (ESI, *m/z*) calcd for C<sub>36</sub>H<sub>31</sub>N<sub>4</sub>O<sub>4</sub>S [M+H]<sup>+</sup>: 615.2061, found: 615.2058. The *ee* value was determined by the chiral HPLC analysis (CHIRALPAK IA, *n*-hexane/2-propanol = 50 : 50,  $\nu = 1.0$  mL/min,  $\lambda = 254.0$  nm;  $t_{\text{major}} = 15.0$  min,  $t_{\text{minor}} = 46.8$  min).

**(R, Z)-1-(3-methoxyphenyl)-3-(thiophen-3-yl)-6-tosyl-1,5,6,13b-tetrahydro-2H-[1,2,4]-triazocino[2,3-c]quinazolin-2-one**

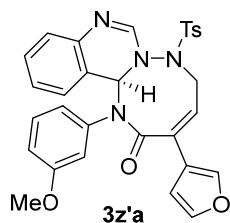

white solid, 51.8 mg, 91%, Mp: 117 – 119 °C, 90% *ee*,  $[\alpha]_D^{25} = 88.0$  (*c* 0.5, CH<sub>2</sub>Cl<sub>2</sub>). <sup>1</sup>H NMR (500 MHz, CDCl<sub>3</sub>):  $\delta = 7.57 - 7.53$  (dd, *J* = 3.0, 1.5 Hz, 1H), 7.53 – 7.48 (m, 2H), 7.42 – 7.38 (dd, *J* = 5.0, 3.0 Hz, 1H), 7.38 – 7.34 (dd, *J* = 5.0, 1.0 Hz, 1H), 7.28 – 7.19 (m, 2H), 7.13 – 7.08 (d, *J* = 8.0 Hz, 2H), 7.01 – 6.93 (m, 2H), 6.93 – 6.89 (dd, *J* = 7.5, 2.0 Hz, 1H), 6.88 – 6.86 (d, *J* = 1.5 Hz, 1H), 6.78 – 6.75 (d, *J* = 1.5 Hz, 1H), 6.75 – 6.70 (dd, *J* = 10.0, 7.0 Hz, 1H), 6.70 – 6.65 (dd, *J* = 8.5, 2.5 Hz, 1H), 6.33 (s, 1H), 6.05 (s, 1H), 5.09 – 5.01 (dd, *J* = 15.5, 7.0 Hz, 1H), 4.38 – 4.30 (dd, *J* = 15.5, 10.0 Hz, 1H), 3.51 (s, 3H), 2.34 (s, 3H). <sup>13</sup>C NMR (CDCl<sub>3</sub>, 125 MHz):  $\delta = 167.5, 159.4, 146.5, 145.8, 141.2, 137.1, 136.9, 136.0, 133.0, 130.1, 130.0, 129.3, 128.8, 127.1, 126.8, 126.1, 126.0, 125.3, 124.6, 122.5, 121.7, 119.9, 115.2, 114.6, 69.7, 55.2, 48.9, 21.7$ . IR (film)  $\nu_{\max} = 2921, 1661, 1598, 1489, 1355, 1276, 1261, 1088, 764, 750$ . HRMS (ESI, *m/z*) calcd for C<sub>30</sub>H<sub>27</sub>N<sub>4</sub>O<sub>4</sub>S<sub>2</sub> [M+H]<sup>+</sup>: 571.1468, found: 571.1467. The *ee* value was determined by the chiral HPLC analysis (CHIRALPAK IA, *n*-hexane/2-propanol = 50 : 50,  $\nu = 1.0$  mL/min,  $\lambda = 254.0$  nm;  $t_{\text{major}} = 11.7$  min,  $t_{\text{minor}} = 24.9$  min).

**(R, Z)-3-(4-chlorophenyl)-12-fluoro-1-(3-methoxyphenyl)-6-tosyl-1,5,6,13b-tetrahydro-2H-[1,2,4]triazocino[2,3-c]quinazolin-2-one**

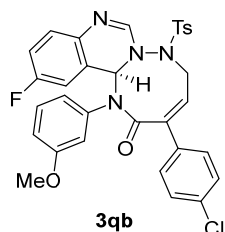

yellow oil, 52.0 mg, 84%, 96% *ee*,  $[\alpha]_D^{25} = 104.0$  (*c* 0.5, CH<sub>2</sub>Cl<sub>2</sub>). <sup>1</sup>H NMR (500 MHz, CDCl<sub>3</sub>):  $\delta = 7.59 - 7.54$  (m, 2H), 7.53 – 7.49 (m, 2H), 7.46 – 7.41 (m, 2H), 7.17 – 7.12 (d, *J* = 8.0 Hz, 2H), 7.03 – 6.89 (m, 3H), 6.88 – 6.83 (d, *J* = 1.5 Hz, 1H), 6.81 – 6.76 (m, 2H), 6.72 – 6.68 (dd, *J* = 8.5, 3.0 Hz, 1H), 6.68 – 6.63 (dd, *J* = 8.0, 2.5 Hz, 1H), 6.34 (s, 1H), 6.15 (s, 1H), 5.09 – 4.99 (dd, *J* = 15.0, 6.5 Hz, 1H), 4.36 – 4.27 (dd, *J* = 15.0, 10.0 Hz, 1H), 3.56 (s, 3H), 2.36 (s, 3H). <sup>13</sup>C NMR (CDCl<sub>3</sub>, 125 MHz):  $\delta = 167.5$ , 160.6 (d, *J* = 245.9 Hz), 159.5, 146.1, 145.8, 140.3, 137.6 (d, *J* = 2.8 Hz), 136.9, 135.6, 133.1, 132.7, 130.1, 129.4, 129.3, 128.8, 128.0, 127.9, 124.6, 121.7, 120.9 (d, *J* = 7.8 Hz), 117.4 (d, *J* = 22.4 Hz), 115.2, 114.6, 113.1 (d, *J* = 23.1 Hz), 69.4, 55.2, 48.9, 21.7. <sup>19</sup>F NMR (CDCl<sub>3</sub>, 470 MHz):  $\delta = -114.6$ . IR (film)  $\nu_{\max} = 2961$ , 2922, 2852, 1661, 1604, 1490, 1385, 1260, 1162, 1088, 1014, 800, 762. HRMS (ESI, *m/z*) calcd for C<sub>32</sub>H<sub>27</sub><sup>35</sup>ClF<sub>4</sub>O<sub>4</sub>S [M+H]<sup>+</sup>: 617.142, found: 617.1418. The *ee* value was determined by the chiral HPLC analysis (CHIRALPAK IA, *n*-hexane/2-propanol = 50 : 50,  $\nu = 1.0$  mL/min,  $\lambda = 254.0$  nm;  $t_{\text{major}} = 13.0$  min,  $t_{\text{minor}} = 33.4$  min).

**(R, Z)-11-bromo-3-(4-chlorophenyl)-1-(3-methoxyphenyl)-6-tosyl-1,5,6,13b-tetrahydro-2H-[1,2,4]triazocino[2,3-c]quinazolin-2-one**

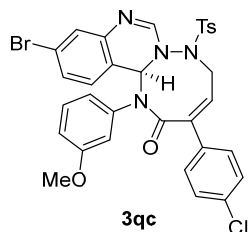

yellow oil, 44.4 mg, 66%, 93% *ee*,  $[\alpha]_D^{25} = 96.0$  (*c* 0.5, CH<sub>2</sub>Cl<sub>2</sub>). <sup>1</sup>H NMR (500 MHz, CDCl<sub>3</sub>):  $\delta = 7.59 - 7.54$  (m, 2H), 7.53 – 7.48 (d, *J* = 8.5 Hz, 2H), 7.44 – 7.39 (m, 2H), 7.38 – 7.32 (dd, *J* = 8.0, 2.0 Hz, 1H), 7.18 – 7.12 (d, *J* = 8.0 Hz, 2H), 7.12 – 7.08 (d, *J* = 2.0 Hz, 1H), 7.05 – 6.97 (t, *J* = 8.0 Hz, 1H), 6.91 – 6.88 (d, *J* = 1.5 Hz, 1H), 6.86 – 6.82 (d, *J* = 8.5 Hz, 1H), 6.81 – 6.75 (m, 2H), 6.74 – 6.68 (dd, *J* = 8.0, 7.0 Hz, 1H), 6.31 (s, 1H), 6.07 (s, 1H), 5.08 – 5.00 (dd, *J* = 15.5, 7.0 Hz, 1H), 4.36 – 4.27 (dd, *J* = 15.5, 10.0 Hz, 1H), 3.55 (s, 3H), 2.36 (s, 3H). <sup>13</sup>C NMR (CDCl<sub>3</sub>, 125 MHz):  $\delta = 167.5$ , 159.6, 147.3, 146.2, 142.4, 140.4, 136.8, 135.6, 133.2, 132.6, 130.1, 129.5, 129.3, 129.2, 128.9, 128.9, 128.5, 128.0, 124.7, 123.5, 121.7, 118.8, 115.2, 114.7, 69.4, 55.2, 48.9, 21.7. IR (film)  $\nu_{\max} = 2922$ , 1667, 1606, 1589, 1490, 1386, 1275, 1261, 1163, 764, 750. HRMS (ESI, *m/z*) calcd for C<sub>32</sub>H<sub>27</sub><sup>79</sup>Br<sup>35</sup>ClN<sub>4</sub>O<sub>4</sub>S [M+H]<sup>+</sup>: 677.0619, found: 677.0618. The *ee* value was determined by the chiral HPLC analysis (CHIRALPAK AD-H, *n*-hexane/2-propanol = 60 : 40,  $\nu = 1.0$  mL/min,  $\lambda = 254.0$  nm;  $t_{\text{minor}} = 14.7$  min,  $t_{\text{major}} = 21.7$  min).

**(R, Z)-3-(4-chlorophenyl)-12-methoxy-1-(3-methoxyphenyl)-6-tosyl-1,5,6,13b-tetrahydro-2H-[1,2,4]triazocino[2,3-c]quinazolin-2-one**

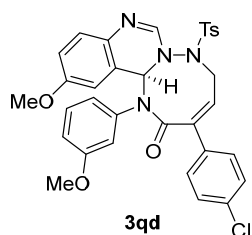

yellow oil, 57.3 mg, 91%, 92% *ee*,  $[\alpha]_D^{25} = 72.0$  (*c* 0.5, CH<sub>2</sub>Cl<sub>2</sub>). <sup>1</sup>H NMR (500 MHz, CDCl<sub>3</sub>):  $\delta = 7.60 - 7.54$  (m, 2H), 7.54 – 7.48 (d, *J* = 8.0 Hz, 2H), 7.46 – 7.39 (m, 2H), 7.16 – 7.09 (d, *J* = 8.5 Hz, 2H), 7.03 – 6.95 (t, *J* = 8.0 Hz, 1H), 6.90 – 6.86 (m, 1H), 6.86 – 6.81 (m, 2H), 6.81 – 6.76 (dd, *J* = 10.0, 7.0 Hz, 1H), 6.71 – 6.65 (m, 2H), 6.45 – 6.40 (d, *J* = 2.5 Hz, 1H), 6.35 (s, 1H), 6.15 (s, 1H), 5.08 – 5.01 (dd, *J* = 15.5, 6.5 Hz, 1H), 4.36 – 4.28 (dd, *J* = 15.5, 10.5 Hz, 1H), 3.80 (s, 3H), 3.54 (s, 3H), 2.35 (s, 3H). <sup>13</sup>C NMR (CDCl<sub>3</sub>, 125 MHz):  $\delta = 167.6, 159.4, 158.0, 145.9, 144.6, 140.4, 137.0, 135.4, 135.0, 133.4, 132.8, 130.0, 129.3, 129.2, 128.9, 128.0, 127.3, 124.7, 121.7, 120.7, 115.7, 115.1, 114.6, 111.7, 69.8, 55.8, 55.1, 48.9, 21.7$ . IR (film)  $\nu_{\max} = 2922, 2850, 1661, 1619, 1603, 1494, 1386, 1228, 1163, 1089, 836$ . HRMS (ESI, *m/z*) calcd for C<sub>33</sub>H<sub>30</sub><sup>35</sup>ClN<sub>4</sub>O<sub>5</sub>S [M+H]<sup>+</sup>: 629.1620, found: 629.1621. The *ee* value was determined by the chiral HPLC analysis (CHIRALPAK IA, *n*-hexane/2-propanol = 50 : 50,  $\nu = 1.0$  mL/min,  $\lambda = 254.0$  nm;  $t_{\text{major}} = 12.2$  min,  $t_{\text{minor}} = 55.7$  min).

**(R, Z)-3-(4-chlorophenyl)-11-methoxy-1-(3-methoxyphenyl)-6-tosyl-1,5,6,13b-tetrahydro-2H-[1,2,4]triazocino[2,3-c]quinazolin-2-one**

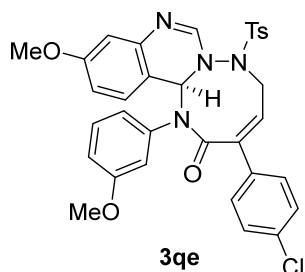

yellow oil, 43.3 mg, 69%, 94% *ee*,  $[\alpha]_D^{25} = 80.0$  (*c* 0.5, CH<sub>2</sub>Cl<sub>2</sub>). <sup>1</sup>H NMR (500 MHz, CDCl<sub>3</sub>):  $\delta = 7.58 - 7.48$  (m, 4H), 7.45 – 7.37 (m, 2H), 7.17 – 7.08 (d, *J* = 8.0 Hz, 2H), 7.05 – 6.96 (t, *J* = 8.0 Hz, 1H), 6.85 – 6.72 (m, 5H), 6.72 – 6.67 (m, 1H), 6.48 – 6.44 (d, *J* = 2.0 Hz, 1H), 6.33 (s, 1H), 6.09 (s, 1H), 5.09 – 5.00 (dd, *J* = 15.5, 7.0 Hz, 1H), 4.38 – 4.30 (dd, *J* = 15.5, 10.0 Hz, 1H), 3.74 (s, 3H), 3.54 (s, 3H), 2.35 (s, 3H). <sup>13</sup>C NMR (CDCl<sub>3</sub>, 125 MHz):  $\delta = 167.5, 160.8, 159.4, 146.7, 145.9, 142.4, 140.6, 137.1, 135.4, 133.3, 132.9, 130.0, 129.3, 129.2, 128.9, 128.0, 127.9, 124.5, 121.7, 115.1, 114.7, 113.9, 112.3, 109.2, 69.7, 55.4, 55.2, 48.9, 21.7$ . IR (film)  $\nu_{\max} = 2921, 2851, 1660, 1603, 1570, 1493, 1387, 1231, 1163, 1088, 761$ . HRMS (ESI, *m/z*) calcd for C<sub>33</sub>H<sub>30</sub><sup>35</sup>ClN<sub>4</sub>O<sub>5</sub>S [M+H]<sup>+</sup>: 629.1620, found: 629.1618. The *ee* value was determined by the chiral HPLC analysis (CHIRALPAK IA, *n*-hexane/2-propanol = 50 : 50,  $\nu = 1.0$  mL/min,  $\lambda = 254.0$  nm;  $t_{\text{major}} = 14.9$  min,  $t_{\text{minor}} = 25.6$  min).

**(R, Z)-3-(4-chlorophenyl)-1-(3-methoxyphenyl)-6-(phenylsulfonyl)-1,5,6,13b-tetrahydro-2H-[1,2,4]triazocino[2,3-c]quinazolin-2-one**

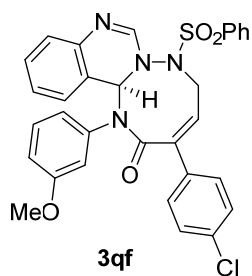

yellow oil, 56.9 mg, 97%, 94% *ee*,  $[\alpha]_D^{25} = 128.0$  (*c* 0.5, CH<sub>2</sub>Cl<sub>2</sub>). <sup>1</sup>H NMR (500 MHz, CDCl<sub>3</sub>):  $\delta = 7.67 - 7.61$  (m, 2H), 7.59 – 7.52 (m, 3H), 7.46 – 7.40 (m, 2H), 7.37 – 7.30 (m, 2H), 7.30 – 7.20 (m, 2H), 7.02 – 6.89 (m, 3H), 6.86 – 6.82 (d, *J* = 1.5 Hz, 1H), 6.82 – 6.76 (m, 2H), 6.73 – 6.65 (dd, *J* = 8.5, 2.5 Hz, 1H), 6.32 (s, 1H), 6.05 (s, 1H), 5.13 – 5.04 (dd, *J* = 15.0, 7.0 Hz, 1H), 4.42 – 4.31 (dd, *J* = 15.0, 10.0 Hz, 1H), 3.51 (s, 3H). <sup>13</sup>C NMR (CDCl<sub>3</sub>, 125 MHz):  $\delta = 167.5$ , 159.4, 146.3, 141.0, 140.6, 136.9, 135.9, 135.5, 134.6, 133.2, 130.1, 129.4, 129.3, 129.3, 128.8, 128.0, 127.1, 126.3, 126.1, 124.3, 121.7, 119.8, 115.2, 114.6, 69.8, 55.2, 48.9. IR (film)  $\nu_{\max} = 2923$ , 1661, 1614, 1598, 1490, 1387, 1261, 1164, 1087, 764, 752. HRMS (ESI, *m/z*) calcd for C<sub>31</sub>H<sub>26</sub><sup>35</sup>ClN<sub>4</sub>O<sub>4</sub>S [M+H]<sup>+</sup>: 585.1358, found: 585.1355. The *ee* value was determined by the chiral HPLC analysis (CHIRALPAK IA, *n*-hexane/2-propanol = 50 : 50,  $\nu = 1.0$  mL/min,  $\lambda = 254.0$  nm;  $t_{\text{major}} = 14.4$  min,  $t_{\text{minor}} = 40.3$  min).

**(R, Z)-3-(4-chlorophenyl)-6-(mesitylsulfonyl)-1-(3-methoxyphenyl)-1,5,6,13b-tetrahydro-2H-[1,2,4]triazocino[2,3-c]quinazolin-2-one**

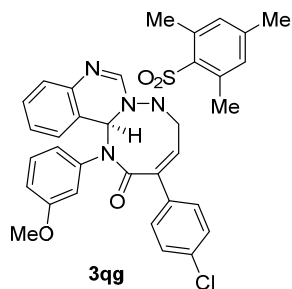

yellow oil, 56.7 mg, 91%, 96% *ee*,  $[\alpha]_D^{25} = 200.0$  (*c* 0.5, CH<sub>2</sub>Cl<sub>2</sub>). <sup>1</sup>H NMR (500 MHz, CDCl<sub>3</sub>):  $\delta = 7.75 - 7.65$  (m, 2H), 7.50 – 7.41 (m, 2H), 7.40 – 7.34 (d, *J* = 1.5 Hz, 1H), 7.25 – 7.18 (m, 2H), 7.12 – 7.05 (m, 1H), 7.02 – 6.94 (t, *J* = 8.5 Hz, 1H), 6.92 – 6.81 (m, 4H), 6.70 – 6.62 (dd, *J* = 8.5, 2.5 Hz, 1H), 6.44 – 6.41 (d, *J* = 1.5 Hz, 1H), 6.36 (s, 1H), 6.09 (s, 1H), 5.09 – 5.00 (dd, *J* = 15.0, 7.0 Hz, 1H), 4.46 – 4.34 (dd, *J* = 15.0, 10.5 Hz, 1H), 3.51 (s, 3H), 2.45 – 2.07 (m, 9H). <sup>13</sup>C NMR (CDCl<sub>3</sub>, 125 MHz):  $\delta = 167.8$ , 159.4, 145.9, 144.7, 141.4, 141.0, 140.2, 137.2, 135.4, 133.5, 132.3, 130.0, 129.3, 129.0, 128.3, 127.2, 126.3, 125.8, 125.2, 121.8, 120.1, 115.3, 114.5, 70.0, 55.2, 48.6, 22.5, 21.2. IR (film)  $\nu_{\max} = 2922$ , 2851, 1662, 1599, 1490, 1276, 1261, 1160, 764, 750. HRMS (ESI, *m/z*) calcd for C<sub>34</sub>H<sub>32</sub><sup>35</sup>ClN<sub>4</sub>O<sub>4</sub>S [M+H]<sup>+</sup>: 627.1827, found: 627.1826. The *ee* value was determined by the chiral HPLC analysis (CHIRALPAK ID, *n*-hexane/2-propanol = 50 : 50,  $\nu = 1.0$  mL/min,  $\lambda = 254.0$  nm;  $t_{\text{major}} = 18.9$  min,  $t_{\text{minor}} = 30.6$  min).

**(R, Z)-6-((4-(tert-butyl)phenyl)sulfonyl)-3-(4-chlorophenyl)-1-(3-methoxyphenyl)-1,5,6,13b-tetrahydro-2H-[1,2,4]triazocino[2,3-c]quinazolin-2-one**

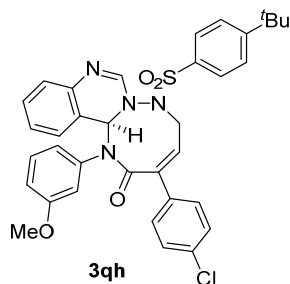

yellow oil, 61.5 mg, 96%, 97% *ee*,  $[\alpha]_D^{25} = 80.0$  (*c* 0.5, CH<sub>2</sub>Cl<sub>2</sub>). <sup>1</sup>H NMR (500 MHz, CDCl<sub>3</sub>):  $\delta = 7.52 - 7.46$  (m, 4H), 7.45 – 7.38 (m, 2H), 7.31 – 7.27 (m, 1H), 7.25 – 7.19 (m, 3H), 7.06 – 7.02 (d, *J* = 2.0 Hz, 1H), 7.02 – 6.96 (m, 2H), 6.81 – 6.74 (m, 2H), 6.71 – 6.65 (dd, *J* = 8.5, 3.0 Hz, 1H), 6.43 – 6.39 (d, *J* = 2.0 Hz, 1H), 6.33 (s, 1H), 6.05 (s, 1H), 5.13 – 5.05 (dd, *J* = 15.0, 6.5 Hz, 1H), 4.39 – 4.31 (dd, *J* = 15.0, 10.0 Hz, 1H), 3.51 (s, 3H), 1.21 (s, 9H). <sup>13</sup>C NMR (CDCl<sub>3</sub>, 125 MHz):  $\delta = 167.4, 159.4, 158.7, 146.5, 141.2, 140.5, 136.9, 135.5, 133.2, 132.6, 130.1, 129.4, 129.3, 128.7, 127.8, 126.9, 126.4, 126.2, 126.1, 124.1, 121.6, 119.7, 115.2, 114.6, 69.8, 55.2, 48.9, 35.2, 30.9$ . HRMS (ESI, *m/z*) calcd for C<sub>35</sub>H<sub>34</sub><sup>35</sup>ClN<sub>4</sub>O<sub>4</sub>S [M+H]<sup>+</sup>: 641.1984, found: 641.1976. The *ee* value was determined by the chiral HPLC analysis (CHIRALPAK IA, *n*-hexane/2-propanol = 85 : 15,  $\nu = 1.0$  mL/min,  $\lambda = 254.0$  nm; *t*<sub>major</sub> = 45.2 min, *t*<sub>minor</sub> = 55.3 min).

**(R, Z)-3-(4-chlorophenyl)-1-(3-methoxyphenyl)-6-((4-methoxyphenyl)sulfonyl)-1,5,6,13b-tetrahydro-2H-[1,2,4]triazocino[2,3-c]quinazolin-2-one**

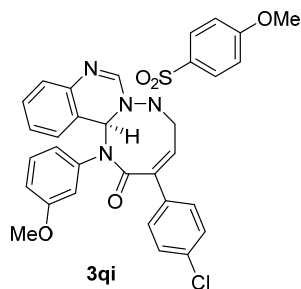

yellow oil, 57.2 mg, 93%, 96% *ee*,  $[\alpha]_D^{25} = 160.0$  (*c* 0.5, CH<sub>2</sub>Cl<sub>2</sub>). <sup>1</sup>H NMR (500 MHz, CDCl<sub>3</sub>):  $\delta = 7.62 - 7.55$  (m, 2H), 7.55 – 7.49 (m, 2H), 7.47 – 7.39 (m, 2H), 7.30 – 7.20 (m, 2H), 7.02 – 6.92 (m, 3H), 6.90 – 6.86 (d, *J* = 1.5 Hz, 1H), 6.84 – 6.82 (d, *J* = 2.0 Hz, 1H), 6.82 – 6.77 (dd, *J* = 10.0, 7.0 Hz, 1H), 6.76 – 6.72 (m, 2H), 6.70 – 6.65 (dd, *J* = 8.5, 2.5 Hz, 1H), 6.33 (s, 1H), 6.06 (s, 1H), 5.09 – 5.01 (dd, *J* = 15.0, 7.0 Hz, 1H), 4.39 – 4.30 (dd, *J* = 15.0, 10.0 Hz, 1H), 3.77 (s, 3H), 3.51 (s, 3H). <sup>13</sup>C NMR (CDCl<sub>3</sub>, 125 MHz):  $\delta = 167.6, 164.4, 159.4, 146.5, 141.1, 140.5, 137.0, 135.5, 133.4, 131.1, 130.0, 129.3, 129.2, 128.1, 127.2, 126.6, 126.2, 126.1, 124.7, 121.7, 119.8, 115.1, 114.6, 69.7, 55.7, 55.2, 48.9$ . IR (film)  $\nu_{\max} = 2924, 2852, 1661, 1614, 1597, 1492, 1387, 1264, 1231, 1157, 1090, 764$ . HRMS (ESI, *m/z*) calcd for C<sub>32</sub>H<sub>28</sub><sup>35</sup>ClN<sub>4</sub>O<sub>5</sub>S [M+H]<sup>+</sup>: 615.1463, found: 615.1462. The *ee* value was determined by the chiral HPLC analysis (CHIRALPAK AD-H, *n*-hexane/2-propanol = 70 : 30,  $\nu = 1.0$  mL/min,  $\lambda = 254.0$  nm; *t*<sub>major</sub> = 30.5 min, *t*<sub>minor</sub> = 39.2 min).



**(2*R*, 4*R*)-1-(4-methoxyphenyl)-5-oxo-2,4-diphenyl-4-vinylpyrrolidine-3,3-dicarbo nitrile**

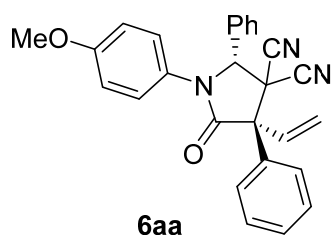

white solid, 39.6 mg, 95%, Mp: 77 – 79 °C, 95% *ee*,  $[\alpha]_D^{25} = 80.0$  (*c* 0.5, CH<sub>2</sub>Cl<sub>2</sub>). <sup>1</sup>H NMR (500 MHz, CDCl<sub>3</sub>): δ = 7.50 – 7.40 (m, 5H), 7.38 – 7.27 (m, 5H), 7.24 – 7.18 (m, 2H), 6.88 – 6.81 (m, 2H), 6.58 – 6.49 (dd, *J* = 17.5, 11.0 Hz, 1H), 5.79 – 5.69 (dd, *J* = 17.5, 11.0 Hz, 2H), 5.27 (s, 1H), 3.76 (s, 3H). <sup>13</sup>C NMR (CDCl<sub>3</sub>, 125 MHz): δ = 169.8, 158.1, 133.7, 133.1, 130.3, 130.1, 129.8, 129.3, 129.0, 128.9, 128.7, 128.4, 125.1, 122.1, 114.5, 112.0, 111.8, 65.8, 62.8, 55.4, 50.5. IR (film)  $\nu_{\max} = 2923, 1721, 1511, 1457, 1363, 1251, 1031, 836, 736, 700$ . HRMS (ESI, *m/z*) calcd for C<sub>27</sub>H<sub>22</sub>N<sub>3</sub>O<sub>2</sub> [M+H]<sup>+</sup>: 420.1707, found: 420.1706. The *ee* value was determined by the chiral HPLC analysis (CHIRALPAK ADH, *n*-hexane/2-propanol = 80 : 20,  $\nu = 1.0$  mL/min,  $\lambda = 254.0$  nm;  $t_{\text{major}} = 10.3$  min,  $t_{\text{minor}} = 16.3$  min).

**(2*R*, 4*R*)-4-(4-chlorophenyl)-1-(4-methoxyphenyl)-5-oxo-2-phenyl-4-vinylpyrrolidine-3,3-dicarbonitrile**

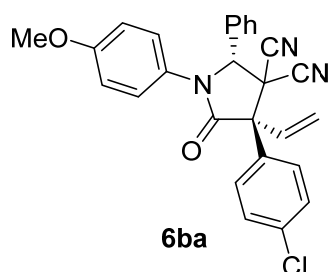

white solid, 41.4 mg, 91%, Mp: 227 – 229 °C, 91% *ee*,  $[\alpha]_D^{25} = 56.0$  (*c* 0.5, CH<sub>2</sub>Cl<sub>2</sub>). <sup>1</sup>H NMR (500 MHz, CDCl<sub>3</sub>): δ = 7.47 – 7.42 (m, 2H), 7.40 – 7.32 (m, 5H), 7.32 – 7.27 (m, 2H), 7.23 – 7.18 (m, 2H), 6.88 – 6.83 (m, 2H), 6.53 – 6.44 (dd, *J* = 17.5, 11.0 Hz, 1H), 5.78 – 5.67 (dd, *J* = 17.5, 11.0 Hz, 2H), 5.28 (s, 1H), 3.76 (s, 3H). <sup>13</sup>C NMR (CDCl<sub>3</sub>, 125 MHz): δ = 169.2, 158.2, 136.1, 133.5, 132.0, 130.5, 130.3, 130.0, 129.5, 129.0, 128.6, 128.3, 125.0, 122.5, 114.5, 112.1, 111.5, 65.9, 62.3, 55.5, 50.3. IR (film)  $\nu_{\max} = 2916, 1724, 1610, 1512, 1494, 1252, 1097, 1031, 809, 704$ . HRMS (ESI, *m/z*) calcd for C<sub>27</sub>H<sub>21</sub><sup>35</sup>ClN<sub>3</sub>O<sub>2</sub> [M+H]<sup>+</sup>: 454.1317, found: 454.1312. The *ee* value was determined by the chiral HPLC analysis (CHIRALPAK ADH, *n*-hexane/2-propanol = 80 : 20,  $\nu = 1.0$  mL/min,  $\lambda = 254.0$  nm;  $t_{\text{major}} = 13.4$  min,  $t_{\text{minor}} = 25.3$  min).

**(2*R*, 4*R*)-4-(4-bromophenyl)-1-(4-methoxyphenyl)-5-oxo-2-phenyl-4-vinylpyrrolidine-3,3-dicarbonitrile**

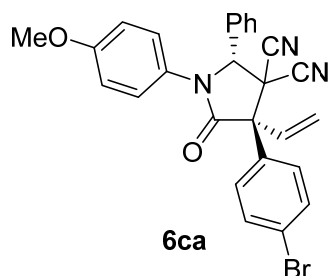

white solid, 44.4 mg, 89%, Mp: 208 – 210 °C, 91% *ee*,  $[\alpha]_D^{25} = 48.0$  (*c* 0.5, CH<sub>2</sub>Cl<sub>2</sub>). <sup>1</sup>H NMR (500 MHz, CDCl<sub>3</sub>): δ = 7.63 – 7.57 (m, 2H), 7.40 – 7.28 (m, 7H), 7.23 – 7.17 (m, 2H), 6.90 – 6.82 (m, 2H), 6.52 – 6.43 (dd, *J* = 17.5, 11.0 Hz, 1H), 5.78 – 5.73 (d, *J* = 11.0 Hz, 1H), 5.73 – 5.66 (d, *J* = 17.5 Hz, 1H), 5.27 (s, 1H), 3.76 (s, 3H). <sup>13</sup>C NMR (CDCl<sub>3</sub>, 125 MHz): δ = 169.2, 158.2, 133.5, 132.5, 130.6, 130.5, 130.0, 129.0, 128.6, 128.2, 125.0, 124.4, 122.6, 114.5, 112.1, 111.5, 65.9, 62.3, 55.5, 50.2. IR (film)  $\nu_{\max} = 2925, 1721, 1610, 1511, 1489, 1364, 1253, 1078, 1027, 804$ . HRMS (ESI, *m/z*) calcd for C<sub>27</sub>H<sub>21</sub><sup>79</sup>BrN<sub>3</sub>O<sub>2</sub> [M+H]<sup>+</sup>: 498.0812, found: 498.0809. The *ee* value was determined by the chiral HPLC analysis (CHIRALPAK ADH, *n*-hexane/2-propanol = 80 : 20,  $\nu = 1.0$  mL/min,  $\lambda = 254.0$  nm;  $t_{\text{major}} = 14.2$  min,  $t_{\text{minor}} = 30.2$  min).

**(2*R*, 4*R*)-1-(4-methoxyphenyl)-5-oxo-2-phenyl-4-(*p*-tolyl)-4-vinylpyrrolidine-3,3-dicarbonitrile**

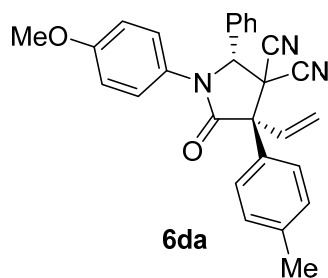

white solid, 34.1 mg, 79%, Mp: 229 – 231 °C, 95% *ee*,  $[\alpha]_D^{25} = 64.0$  (*c* 0.5, CH<sub>2</sub>Cl<sub>2</sub>). <sup>1</sup>H NMR (500 MHz, CDCl<sub>3</sub>): δ = 7.37 – 7.23 (m, 9H), 7.22 – 7.17 (m, 2H), 6.88 – 6.82 (m, 2H), 6.57 – 6.48 (dd, *J* = 18.0, 11.0 Hz, 1H), 5.77 – 5.69 (dd, *J* = 18.0, 11.0 Hz, 2H), 5.26 (s, 1H), 3.75 (s, 3H), 2.39 (s, 3H). <sup>13</sup>C NMR (CDCl<sub>3</sub>, 125 MHz): δ = 169.9, 158.1, 140.0, 133.8, 130.3, 130.2, 130.0, 129.9, 128.9, 128.7, 128.6, 128.4, 125.1, 121.8, 114.4, 112.1, 111.9, 65.8, 62.7, 55.4, 50.6, 21.2. IR (film)  $\nu_{\max} = 2923, 2853, 1722, 1511, 1457, 1363, 1252, 1029, 806, 704$ . HRMS (ESI, *m/z*) calcd for C<sub>28</sub>H<sub>24</sub>N<sub>3</sub>O<sub>2</sub> [M+H]<sup>+</sup>: 434.1863, found: 434.1859. The *ee* value was determined by the chiral HPLC analysis (CHIRALPAK ADH, *n*-hexane/2-propanol = 80 : 20,  $\nu = 1.0$  mL/min,  $\lambda = 254.0$  nm;  $t_{\text{major}} = 17.8$  min,  $t_{\text{minor}} = 30.2$  min).

**(2R, 4R)-1-(4-methoxyphenyl)-4-(naphthalen-2-yl)-5-oxo-2-phenyl-4-vinylpyrrolidine-3,3-dicarbonitrile**

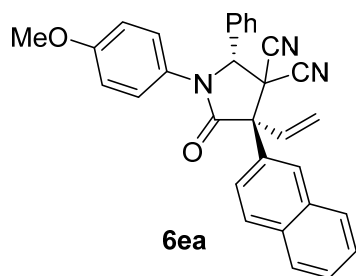

white solid, 44.5 mg, 95%, Mp: 238 – 240 °C, 92% *ee*,  $[\alpha]_D^{25} = 64.0$  (*c* 0.5, CH<sub>2</sub>Cl<sub>2</sub>). <sup>1</sup>H NMR (500 MHz, CDCl<sub>3</sub>):  $\delta = 7.99 - 7.94$  (d, *J* = 9.0 Hz, 1H), 7.91 – 7.86 (d, *J* = 8.0 Hz, 1H), 7.85 – 7.81 (d, *J* = 2.0 Hz, 1H), 7.81 – 7.77 (d, *J* = 8.0 Hz, 1H), 7.62 – 7.49 (m, 3H), 7.35 – 7.23 (m, 7H), 6.90 – 6.85 (m, 2H), 6.65 – 6.57 (dd, *J* = 17.5, 11.0 Hz, 1H), 5.83 – 5.73 (dd, *J* = 17.5, 11.0 Hz, 2H), 5.33 (s, 1H), 3.76 (s, 3H). <sup>13</sup>C NMR (CDCl<sub>3</sub>, 125 MHz):  $\delta = 169.8, 158.2, 133.7, 133.4, 133.0, 130.4, 130.3, 130.1, 129.2, 129.0, 128.7, 128.7, 128.6, 128.5, 127.7, 127., 127.01, 125.8, 125.2, 122.5, 114.6, 112.1, 111.9, 66.0, 63.1, 55.5, 50.5$ . IR (film)  $\nu_{\max} = 2925, 1722, 1512, 1457, 1363, 1300, 1250, 1180, 837$ . HRMS (ESI, *m/z*) calcd for C<sub>31</sub>H<sub>24</sub>N<sub>3</sub>O<sub>2</sub> [M+H]<sup>+</sup>: 470.1863, found: 470.1857. The *ee* value was determined by the chiral HPLC analysis (CHIRALPAK ADH, *n*-hexane/2-propanol = 80 : 20,  $\nu = 1.0$  mL/min,  $\lambda = 254.0$  nm;  $t_{\text{major}} = 14.4$  min,  $t_{\text{minor}} = 48.7$  min).

**(2R, 4S)-1-(4-methoxyphenyl)-5-oxo-2-phenyl-4-(thiophen-3-yl)-4-vinylpyrrolidine-3,3-dicarbonitrile**

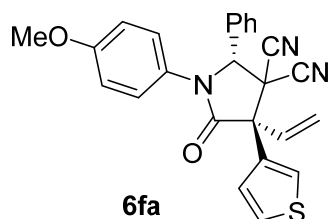

white solid, 41.4 mg, 97%, Mp: 143 – 145 °C, 92% *ee*,  $[\alpha]_D^{25} = 72.0$  (*c* 0.5, CH<sub>2</sub>Cl<sub>2</sub>). <sup>1</sup>H NMR (500 MHz, CDCl<sub>3</sub>):  $\delta = 7.49 - 7.44$  (m, 1H), 7.39 – 7.29 (m, 6H), 7.22 – 7.17 (m, 3H), 6.87 – 6.81 (m, 2H), 6.52 – 6.44 (dd, *J* = 17.5, 11.0 Hz, 1H), 5.74 – 5.67 (dd, *J* = 17.5, 11.0 Hz, 2H), 5.34 (s, 1H), 3.75 (s, 3H). <sup>13</sup>C NMR (CDCl<sub>3</sub>, 125 MHz):  $\delta = 169.5, 158.1, 133.3, 133.1, 130.4, 130.2, 129.0, 128.6, 128.5, 127.5, 127.3, 126.4, 125.0, 122.1, 114.5, 112.2, 111.6, 66.0, 60.2, 55.4, 50.2$ . IR (film)  $\nu_{\max} = 2923, 1723, 1511, 1457, 1362, 1252, 1029, 835, 737, 702$ . HRMS (ESI, *m/z*) calcd for C<sub>25</sub>H<sub>20</sub>N<sub>3</sub>O<sub>2</sub>S [M+H]<sup>+</sup>: 426.1271, found: 426.1270. The *ee* value was determined by the chiral HPLC analysis (CHIRALPAK ADH, *n*-hexane/2-propanol = 80 : 20,  $\nu = 1.0$  mL/min,  $\lambda = 254.0$  nm;  $t_{\text{major}} = 14.5$  min,  $t_{\text{minor}} = 25.8$  min).

**(2*R*, 4*R*)-2-(4-fluorophenyl)-1-(4-methoxyphenyl)-5-oxo-4-phenyl-4-vinylpyrrolidine-3,3-dicarbonitrile**

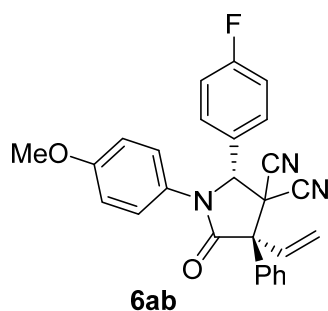

white solid, 35.7 mg, 82%, Mp: 76 – 78 °C, 94% *ee*,  $[\alpha]_D^{25} = 56.0$  (*c* 0.5, CH<sub>2</sub>Cl<sub>2</sub>). <sup>1</sup>H NMR (500 MHz, CDCl<sub>3</sub>): δ = 7.50 – 7.44 (m, 3H), 7.44 – 7.40 (m, 2H), 7.32 – 7.26 (m, 2H), 7.21 – 7.14 (m, 2H), 7.06 – 6.98 (m, 2H), 6.90 – 6.83 (m, 2H), 6.59 – 6.48 (dd, *J* = 18.0, 11.0 Hz, 1H), 5.82 – 5.70 (dd, *J* = 18.0, 11.0 Hz, 2H), 5.25 (s, 1H), 3.77 (s, 3H). <sup>13</sup>C NMR (CDCl<sub>3</sub>, 125 MHz): δ = 169.7, 163.7 (d, *J* = 249.4 Hz), 158.3, 133.6, 132.8, 130.6 (d, *J* = 8.5 Hz), 129.9, 129.4, 128.8, 128.1, 125.9 (d, *J* = 3.0 Hz), 125.1, 122.0, 116.4, 116.2, 114.6, 111.8 (d, *J* = 5.0 Hz), 65.2, 62.8, 55.5, 50.5. <sup>19</sup>F NMR (CDCl<sub>3</sub>, 470 MHz): – 109.6. δ = IR (film) ν<sub>max</sub> = 2923, 1720, 1511, 1447, 1363, 1274, 1254, 1179, 1030, 837, 750. HRMS (ESI, *m/z*) calcd for C<sub>27</sub>H<sub>21</sub>FN<sub>3</sub>O<sub>2</sub> [M+H]<sup>+</sup>: 438.1612, found: 438.1610. The *ee* value was determined by the chiral HPLC analysis (CHIRALPAK ADH, *n*-hexane/2-propanol = 80 : 20, *v* = 1.0 mL/min, λ = 254.0 nm; *t*<sub>major</sub> = 10.7 min, *t*<sub>minor</sub> = 21.9 min).

**(2*R*, 4*R*)-1-(4-methoxyphenyl)-5-oxo-4-phenyl-2-(*p*-tolyl)-4-vinylpyrrolidine-3,3-dicarbonitrile**

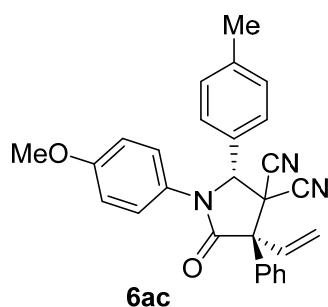

white solid, 37.3 mg, 86%, Mp: 216 – 218 °C, 95% *ee*,  $[\alpha]_D^{25} = 40.0$  (*c* 0.5, CH<sub>2</sub>Cl<sub>2</sub>). <sup>1</sup>H NMR (500 MHz, CDCl<sub>3</sub>): δ = 7.50 – 7.39 (m, 5H), 7.23 – 7.15 (m, 4H), 7.15 – 7.09 (d, *J* = 2.0 Hz, 2H), 6.89 – 6.80 (m, 2H), 6.58 – 6.47 (dd, *J* = 17.5, 11.0 Hz, 1H), 5.78 – 5.68 (dd, *J* = 17.5, 11.0 Hz, 2H), 5.24 (s, 1H), 3.75 (s, 3H), 2.29 (s, 3H). <sup>13</sup>C NMR (CDCl<sub>3</sub>, 125 MHz): δ = 169.7, 158.1, 140.5, 133.8, 133.2, 129.8, 129.7, 129.3, 128.9, 128.5, 128.5, 127.1, 125.1, 122.0, 114.4, 112.1, 111.3, 65.74, 62.80, 55.4, 50.6, 21.3. δ = IR (film) ν<sub>max</sub> = 2923, 1724, 1512, 1457, 1364, 1252, 1179, 1032, 754, 699. HRMS (ESI, *m/z*) calcd for C<sub>28</sub>H<sub>24</sub>N<sub>3</sub>O<sub>2</sub> [M+H]<sup>+</sup>: 434.1863, found: 434.1864. The *ee* value was determined by the chiral HPLC analysis (CHIRALPAK ADH, *n*-hexane/2-propanol = 80 : 20, *v* = 1.0 mL/min, λ = 254.0 nm; *t*<sub>major</sub> = 10.6 min, *t*<sub>minor</sub> = 16.5 min).

**(2*S*, 4*R*)-2-(furan-2-yl)-1-(4-methoxyphenyl)-5-oxo-4-phenyl-4-vinylpyrrolidine-3,3-dicarbonitrile**

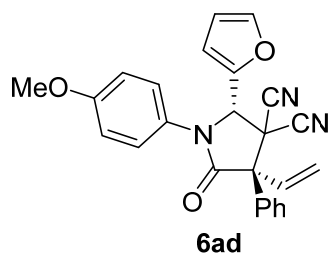

white solid, 30.7 mg, 75%, Mp: 170 – 172 °C, 97% *ee*,  $[\alpha]_D^{25} = 24.0$  (*c* 0.5, CH<sub>2</sub>Cl<sub>2</sub>). <sup>1</sup>H NMR (500 MHz, CDCl<sub>3</sub>):  $\delta = 7.54 - 7.42$  (m, 6H), 7.24 – 7.18 (m, 2H), 6.93 – 6.87 (m, 2H), 6.61 – 6.52 (dd, *J* = 17.0, 10.5 Hz, 1H), 6.48 – 6.45 (d, *J* = 3.5 Hz, 1H), 6.38 – 6.34 (dd, *J* = 3.5, 2.0 Hz, 1H), 5.75 – 5.69 (d, *J* = 10.5 Hz, 1H), 5.69 – 5.64 (d, *J* = 17.0 Hz, 1H), 5.46 (s, 1H), 3.79 (s, 3H). <sup>13</sup>C NMR (CDCl<sub>3</sub>, 125 MHz):  $\delta = 168.6, 158.8, 144.8, 144.0, 134.1, 133.6, 129.7, 129.3, 128., 128.21, 126.0, 122.5, 114.6, 113.8, 112.3, 111.6, 111.3, 62.2, 61.6, 55.5, 48.5$ .  $\delta$ =IR (film)  $\nu_{\max} = 2923, 1719, 1512, 1457, 1367, 1250, 1180, 836, 733$ . HRMS (ESI, *m/z*) calcd for C<sub>25</sub>H<sub>20</sub>N<sub>3</sub>O<sub>3</sub> [M+H]<sup>+</sup>: 410.1499, found: 410.1501. The *ee* value was determined by the chiral HPLC analysis (CHIRALPAK ADH, *n*-hexane/2-propanol = 80 : 20,  $\nu = 1.0$  mL/min,  $\lambda = 254.0$  nm;  $t_{\text{major}} = 21.7$  min,  $t_{\text{minor}} = 27.7$  min).

**(2*R*, 3*S*, 4*R*)-3-(aminomethyl)-1-(4-methoxyphenyl)-5-oxo-2,4-diphenyl-4-vinylpyrrolidine-3-carbonitrile**

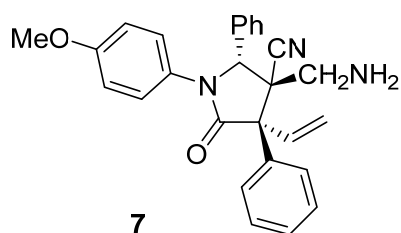

white solid, 63.3 mg, 75%, Mp: 235 – 237 °C, 95% *ee*,  $[\alpha]_D^{25} = 96.0$  (*c* 0.5, CH<sub>2</sub>Cl<sub>2</sub>). <sup>1</sup>H NMR (500 MHz, CDCl<sub>3</sub>):  $\delta = 7.53 - 7.43$  (m, 4H), 7.41 – 7.27 (m, 8H), 6.88 – 6.78 (m, 2H), 6.56 – 6.45 (dd, *J* = 17.0, 10.5 Hz, 1H), 5.61 (s, 1H), 5.54 – 5.48 (d, *J* = 17.0 Hz, 1H), 5.48 – 5.42 (d, *J* = 10.5 Hz, 1H), 3.74 (s, 3H), 2.62 – 2.52 (d, *J* = 13.5 Hz, 1H), 2.52 – 2.44 (d, *J* = 13.5 Hz, 1H), 1.34 (s, 2H). <sup>13</sup>C NMR (CDCl<sub>3</sub>, 125 MHz):  $\delta = 170.9, 157.3, 138.3, 137.8, 135.7, 130.5, 129.1, 128.7, 128.5, 128.5, 127.9, 124.0, 121.2, 118.9, 114.2, 64.5, 60.7, 55.6, 55.4, 47.0$ . HRMS (ESI, *m/z*) calcd for C<sub>27</sub>H<sub>26</sub>N<sub>3</sub>O<sub>2</sub> [M+H]<sup>+</sup>: 424.2020, found: 424.2015. The *ee* value was determined by the chiral HPLC analysis (CHIRALPAK ADH, *n*-hexane/2-propanol = 75 : 25,  $\nu = 1.0$  mL/min,  $\lambda = 254.0$  nm;  $t_{\text{major}} = 14.3$  min,  $t_{\text{minor}} = 51.5$  min).



7.634  
7.630  
7.624  
7.617  
7.614  
7.465  
7.462  
7.460  
7.455  
7.449  
7.447  
7.444  
7.442  
7.438  
7.433  
7.398  
7.395  
7.420  
7.416  
7.414  
7.392  
7.390  
7.388  
7.286  
7.276  
7.274  
7.272  
7.270  
7.254  
7.249  
7.245  
7.243  
7.235  
7.230  
7.226  
7.195  
7.193  
7.190  
7.188  
7.119  
7.117  
7.113  
7.112  
7.102  
7.100  
7.097  
7.095  
7.089  
6.278  
6.265  
6.243  
5.728  
5.684  
5.527  
5.506

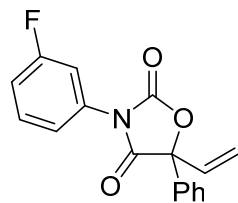

**1b**

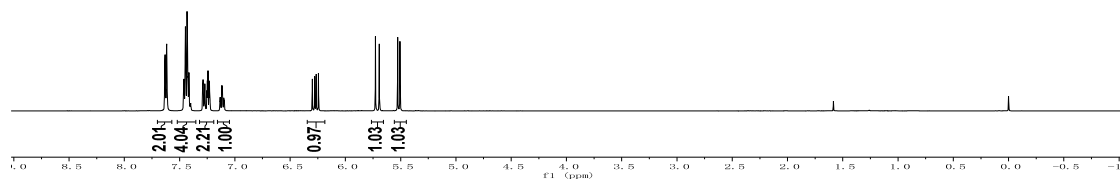

LK-4-80-JF2: 11: f1.d

170.320  
163.397  
161.624  
152.528  
134.594  
133.336  
132.104  
132.022  
130.365  
129.584  
129.582  
125.372  
121.144  
121.117  
118.524  
118.447  
115.800  
113.303  
113.104  
87.274

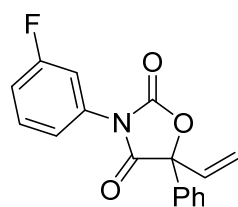

**1b**

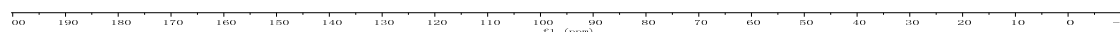

LK-4-80-JF2: 12: f1.d

110.323

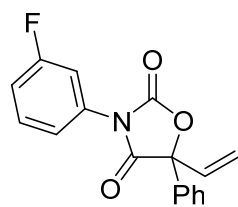

**1b**

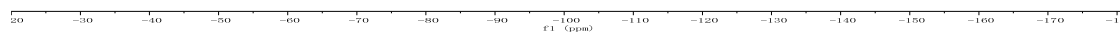

$^1\text{H}$  NMR (500 MHz)  $^{13}\text{C}$  NMR (125 MHz) and  $^{19}\text{F}$  NMR (470 MHz) spectra of **1b**

LK-4-82-DF, 11, f1.d  
 7.633  
 7.628  
 7.615  
 7.445  
 7.432  
 7.415  
 7.403  
 7.398  
 7.395  
 7.385  
 7.155  
 7.138  
 7.126  
 6.252  
 6.271  
 6.258  
 6.236  
 5.716  
 5.681  
 5.506  
 5.485

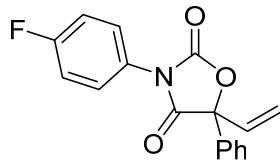

**1c**

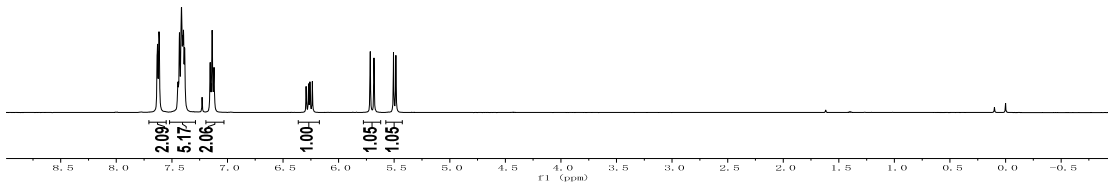

LK-4-82-DF, 11, f1.d

170.821  
 163.860  
 161.865  
 152.824  
 134.707  
 133.250  
 129.666  
 129.073  
 127.714  
 127.645  
 126.769  
 126.730  
 125.400  
 118.452  
 116.519  
 116.335  
 87.372

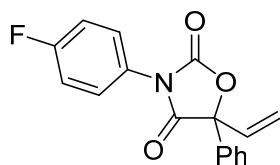

**1c**

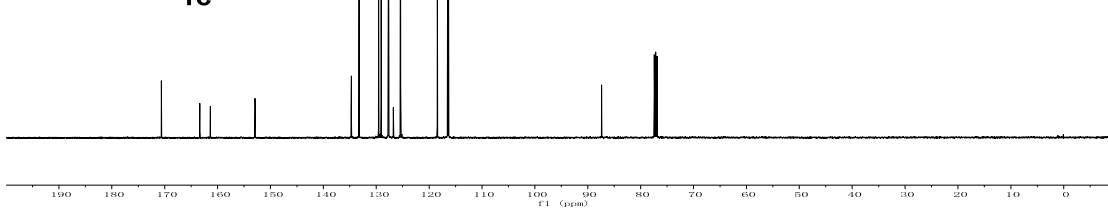

LK-4-82-DF, 26, f1.d

111.246

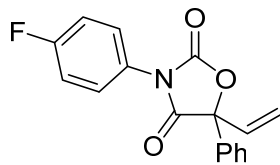

**1c**

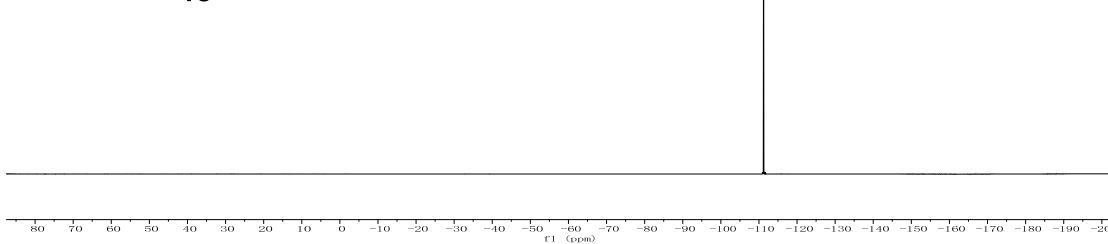

$^1\text{H}$  NMR (500 MHz)  $^{13}\text{C}$  NMR (125 MHz) and  $^{19}\text{F}$  NMR (470 MHz) spectra of **1c**



7.650  
7.626  
7.617  
7.614  
7.611  
7.493  
7.489  
7.488  
7.465  
7.460  
7.458  
7.448  
7.443  
7.436  
7.435  
7.436  
7.432  
7.415  
7.406  
7.401  
7.393  
7.391  
7.386  
7.379  
7.375  
7.371  
7.367  
7.363  
7.357  
7.353  
7.348  
6.296  
6.275  
6.262  
6.240  
5.727  
5.692  
5.528  
5.506

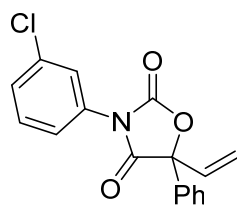

**1d**

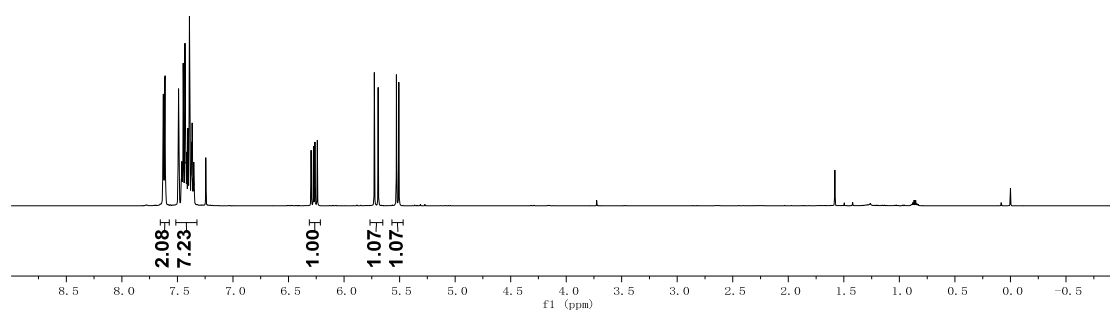

LK-5-17-JCL. 11. fid

170.303  
152.506  
134.958  
134.575  
133.844  
133.827  
130.998  
129.699  
129.218  
129.090  
125.832  
125.364  
123.714  
118.541  
87.354

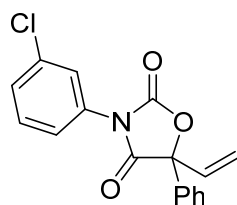

**1d**

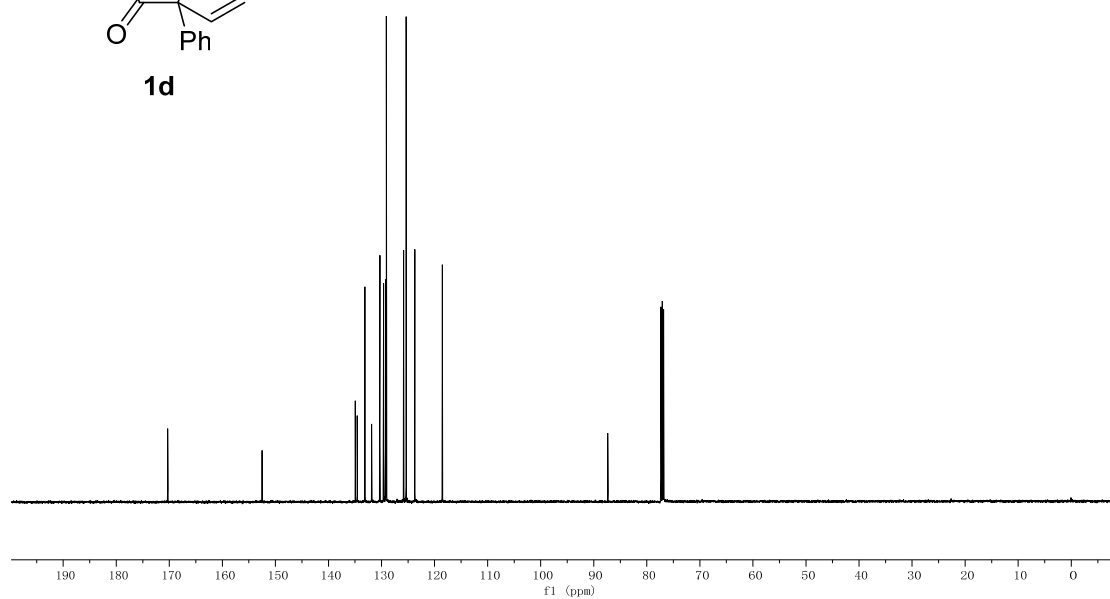

$^1\text{H}$  NMR (500 MHz) and  $^{13}\text{C}$  NMR (125 MHz) spectra of **1d**

7.632  
7.626  
7.624  
7.616  
7.615  
7.613  
7.603  
7.463  
7.455  
7.453  
7.449  
7.443  
7.440  
7.435  
7.431  
7.428  
7.425  
7.420  
7.416  
7.414  
7.409  
7.404  
7.399  
7.390  
7.386  
6.296  
6.274  
6.261  
6.240  
5.724  
5.689  
5.523  
5.502

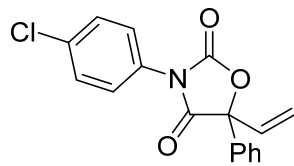

**1e**

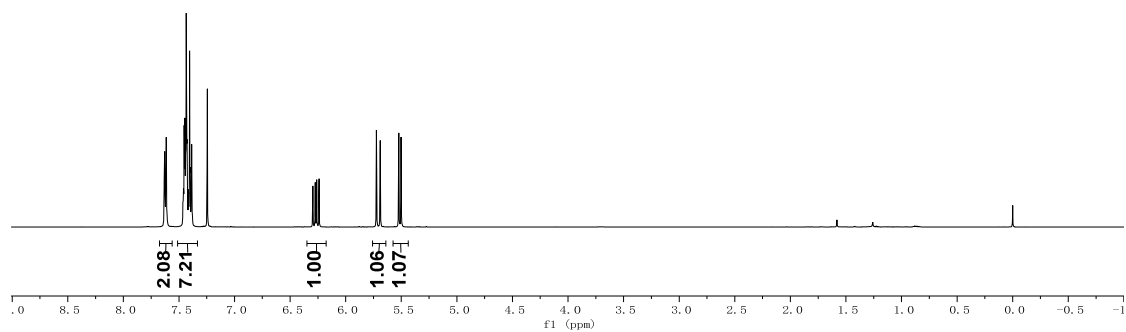

LK-4-39-DCL-1.14.fid

170.419  
152.673  
134.845  
134.611  
133.169  
129.583  
129.565  
129.305  
129.076  
126.828  
125.364  
118.499  
87.358

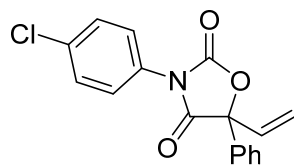

**1e**

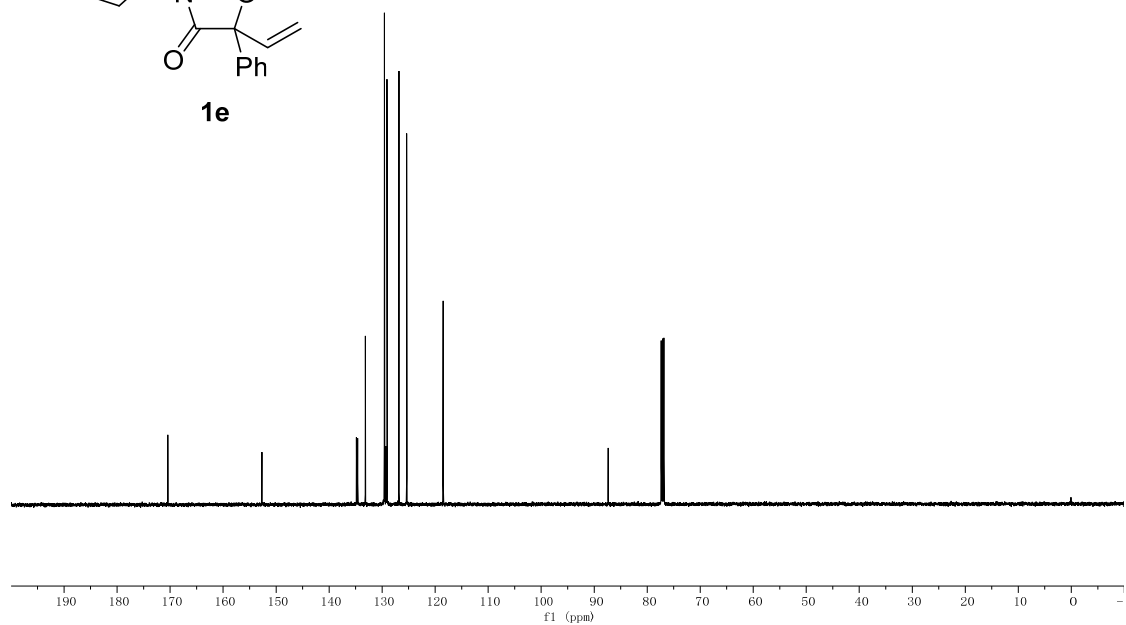

$^1\text{H}$  NMR (500 MHz) and  $^{13}\text{C}$  NMR (125 MHz) spectra of **1e**

7.631  
7.627  
7.618  
7.614  
7.611  
7.607  
7.597  
7.593  
7.486  
7.463  
7.461  
7.458  
7.454  
7.448  
7.445  
7.443  
7.437  
7.434  
7.430  
7.427  
7.423  
7.418  
7.416  
7.402  
7.393  
7.348  
7.343  
7.334  
7.330  
7.324  
6.295  
6.274  
6.261  
6.240  
5.724  
5.689  
5.525  
5.504

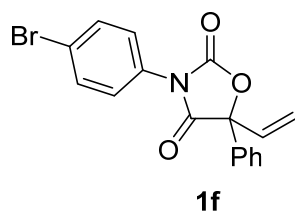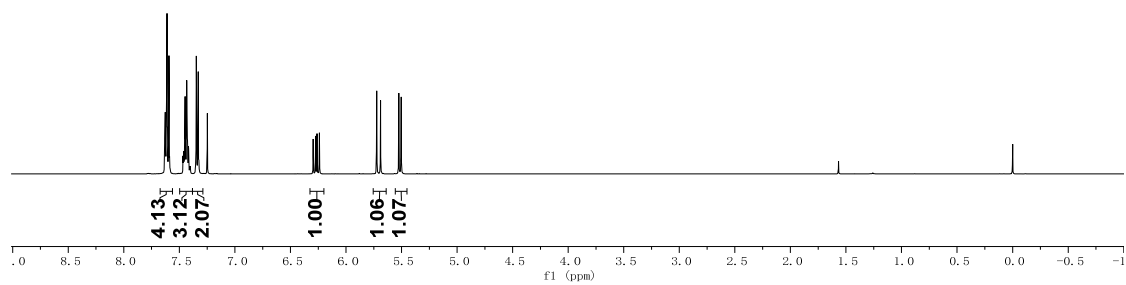

LK-4-75-DR2. 11. fid

170.351  
152.588  
134.607  
133.900  
132.540  
129.857  
129.582  
129.076  
127.063  
125.364  
122.861  
118.510  
87.358

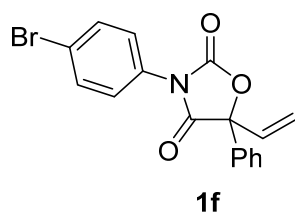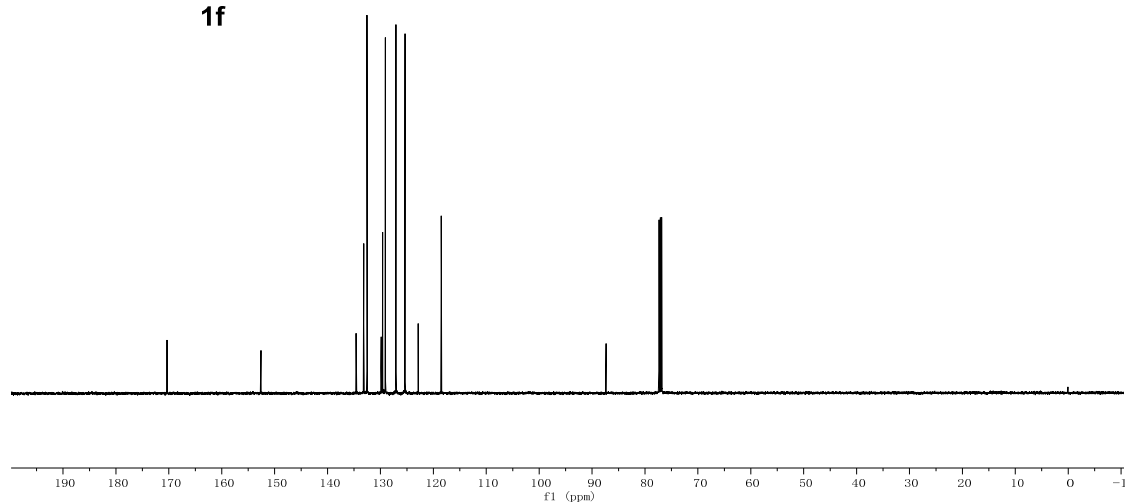

$^1\text{H}$  NMR (500 MHz) and  $^{13}\text{C}$  NMR (125 MHz) spectra of **1f**

7.742, 7.743, 7.734, 7.736, 7.642, 7.638, 7.634, 7.628, 7.622, 7.616, 7.470, 7.466, 7.465, 7.461, 7.458, 7.453, 7.449, 7.447, 7.441, 7.437, 7.434, 7.431, 7.426, 7.420, 7.419, 7.412, 7.409, 7.406, 7.403, 6.308, 6.286, 6.273, 6.252, 5.735, 5.701, 5.637, 5.516

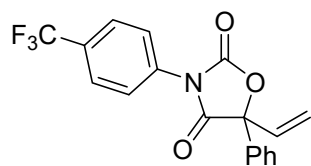

**1g**

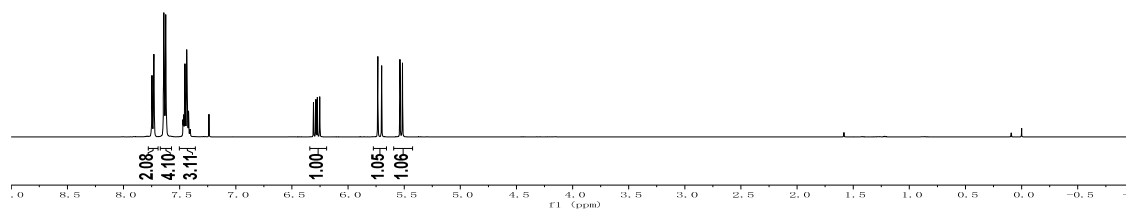

LK-4-102-DCF3, 23, F1d

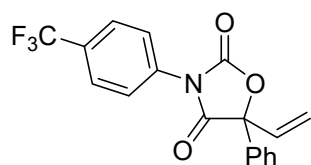

**1g**

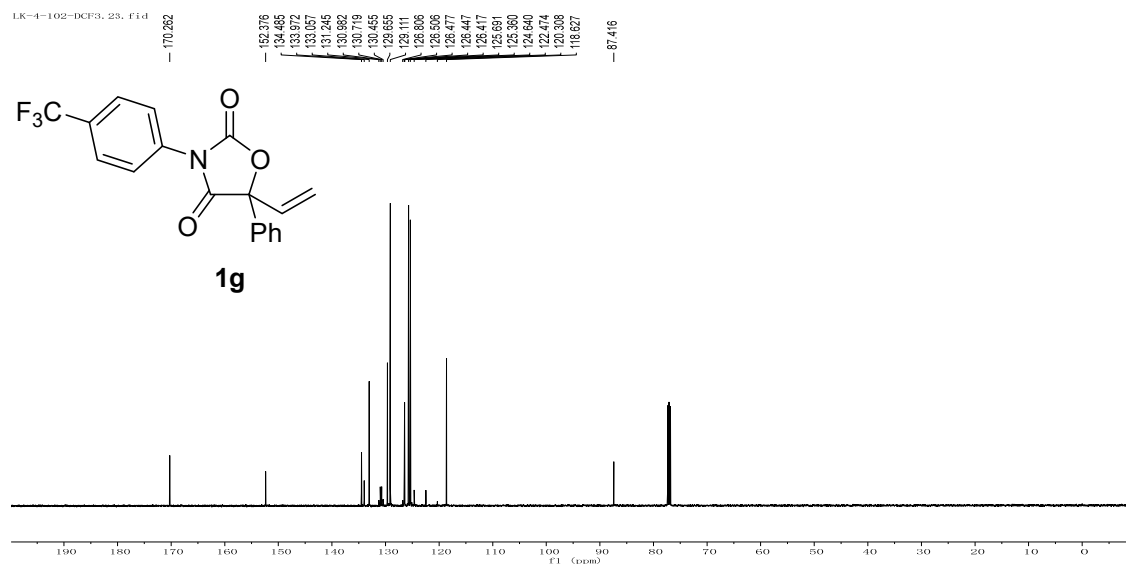

LK-4-102-DCF3, 24, F1d

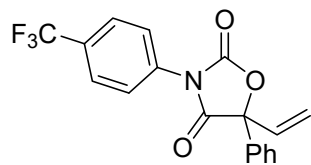

**1g**

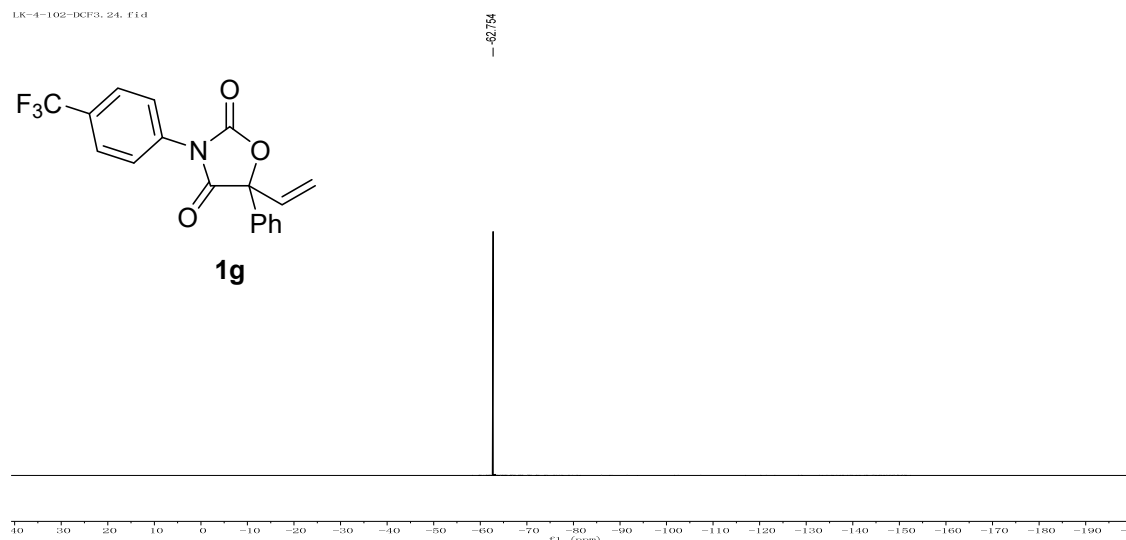

$^1\text{H}$  NMR (500 MHz)  $^{13}\text{C}$  NMR (125 MHz) and  $^{19}\text{F}$  NMR (470 MHz) spectra of **1g**

7.644  
7.640  
7.636  
7.636  
7.624  
7.624  
7.452  
7.444  
7.435  
7.430  
7.423  
7.419  
7.414  
7.410  
7.405  
7.397  
7.390  
7.388  
7.383  
7.380  
7.360  
7.353  
7.345  
7.340  
7.334  
7.329  
7.225  
7.216  
7.207  
7.202  
7.186  
7.182  
7.179  
6.301  
6.280  
6.267  
6.245  
5.729  
5.695  
5.507  
5.486

— 2.370

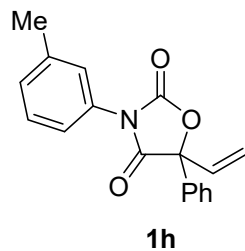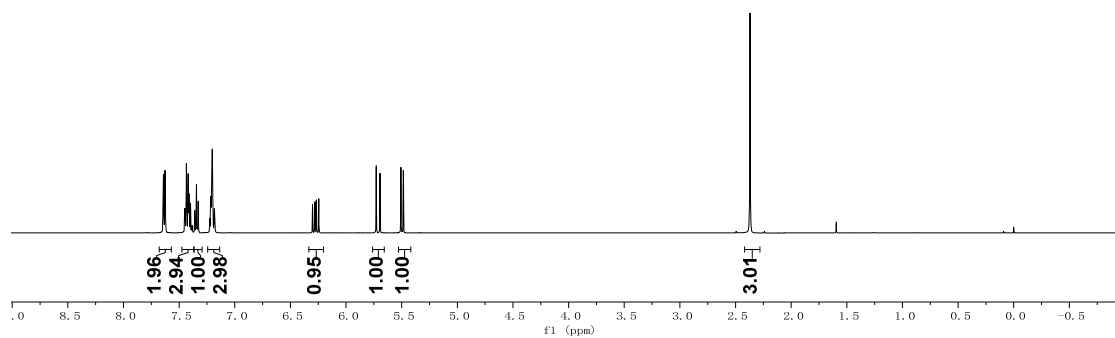

LK-4-149-JME.11.fid

— 170.801

— 153.184

139.564  
134.895  
133.390  
130.650  
129.951  
129.489  
129.207  
129.043  
129.039  
126.365  
125.440  
122.910  
118.316

— 87.268

— 21.344

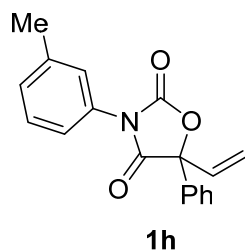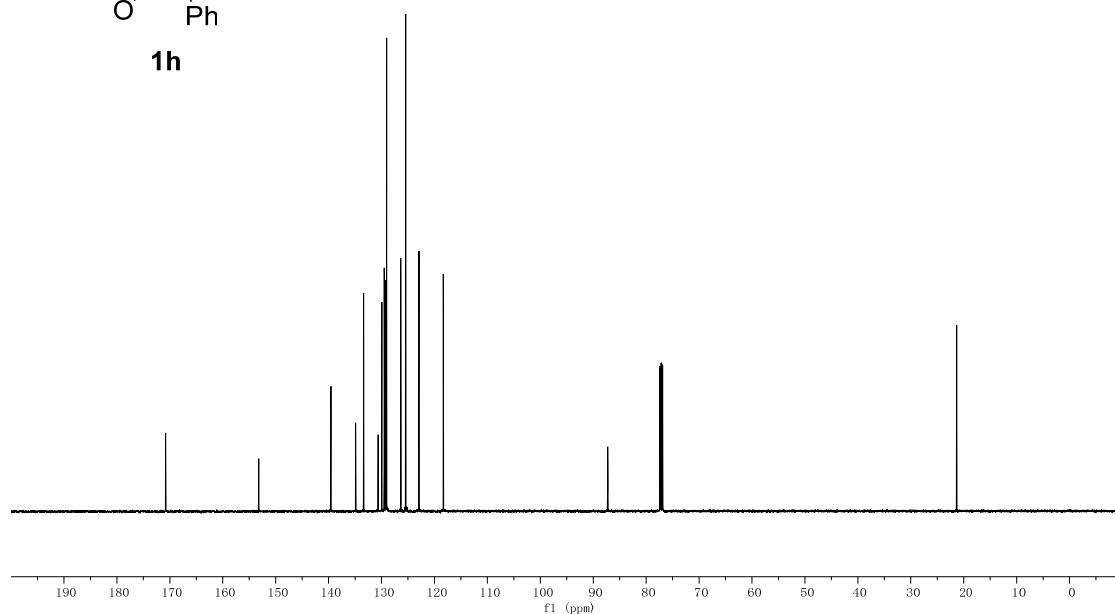

$^1\text{H}$  NMR (500 MHz) and  $^{13}\text{C}$  NMR (125 MHz) spectra of **1h**

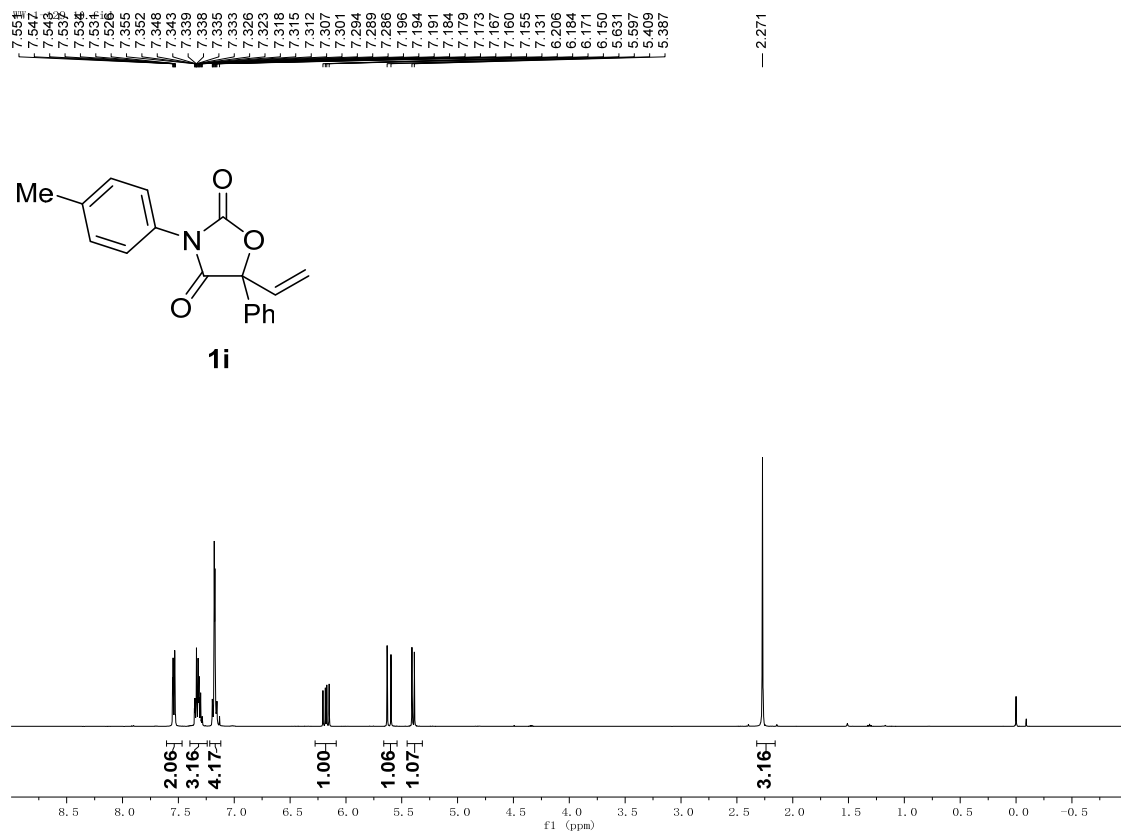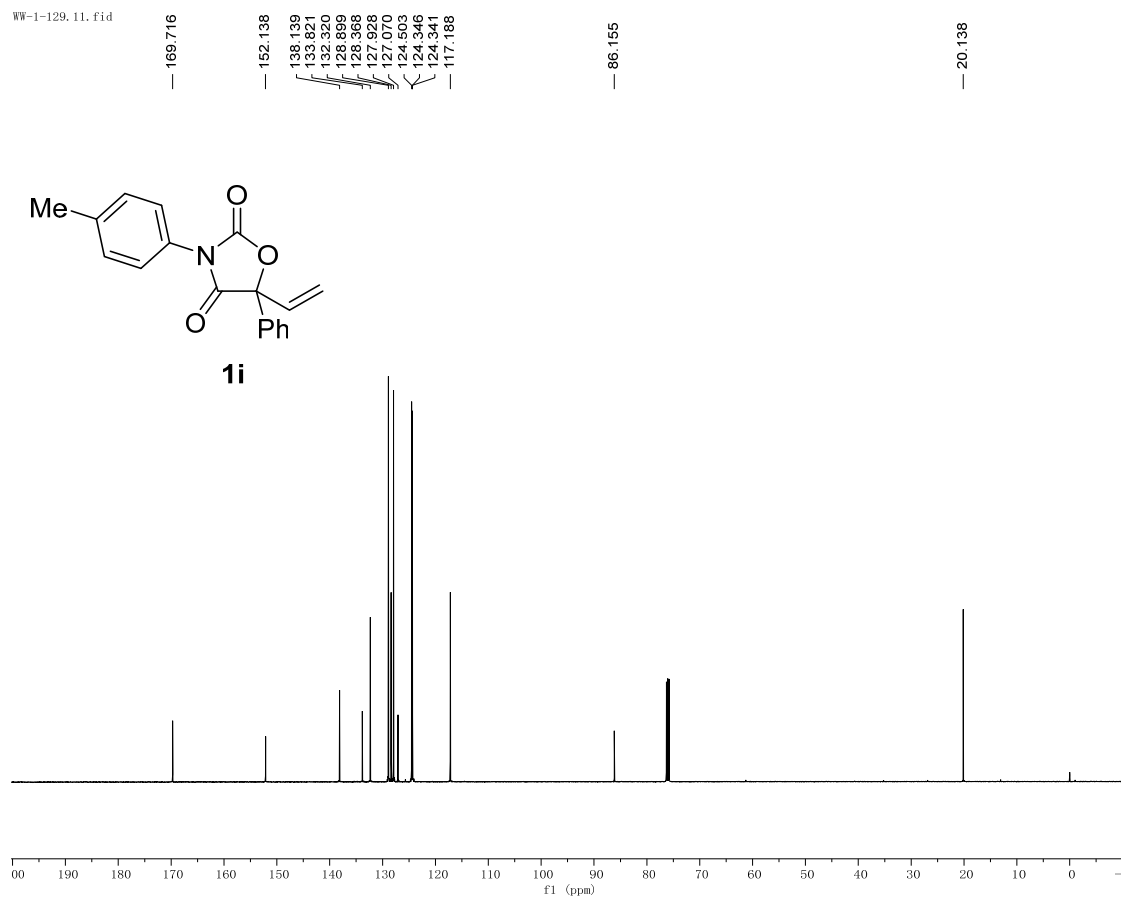

$^1\text{H}$  NMR (500 MHz) and  $^{13}\text{C}$  NMR (125 MHz) spectra of **1i**

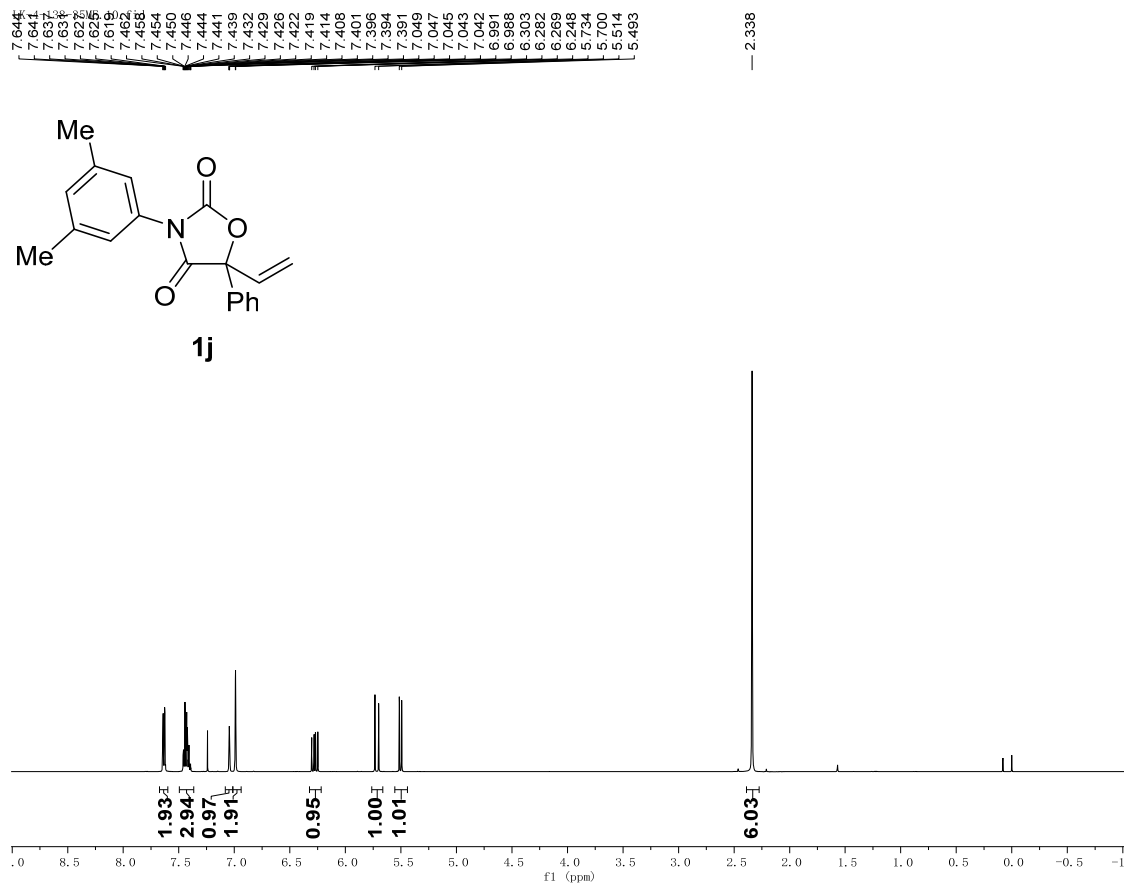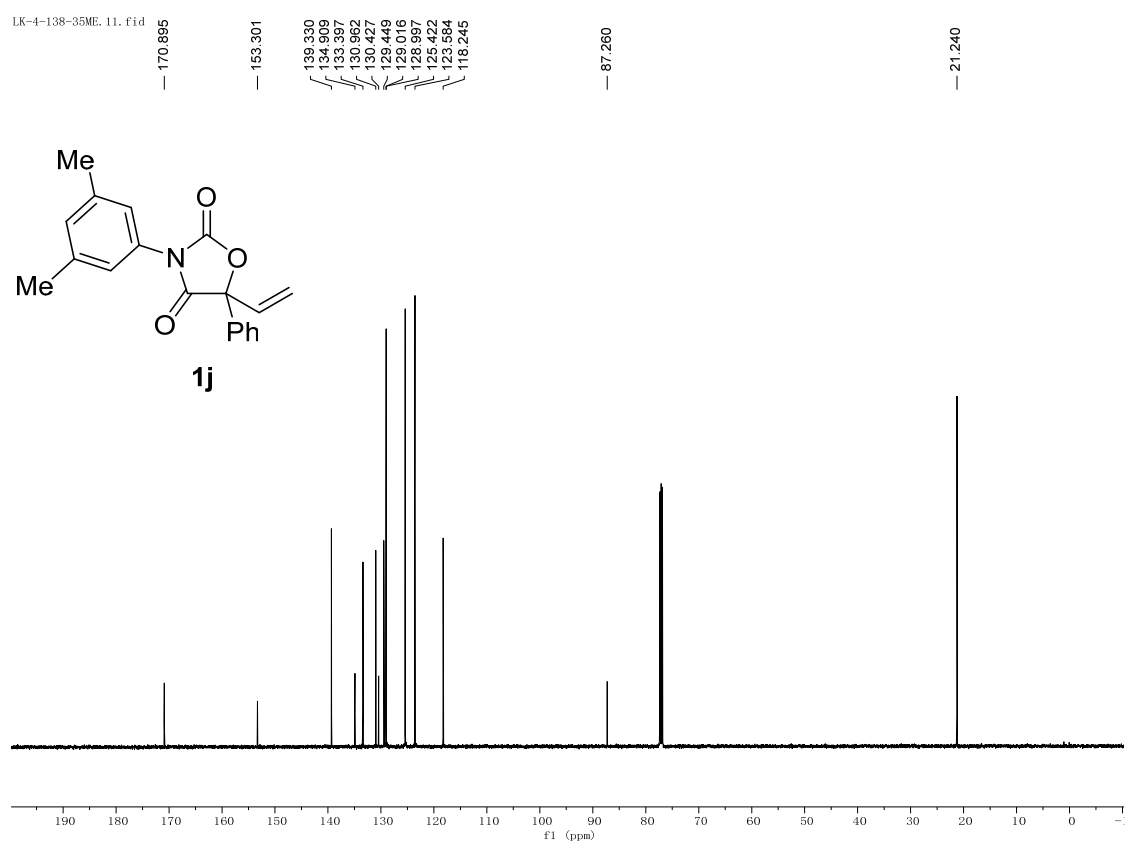

<sup>1</sup>H NMR (500 MHz) and <sup>13</sup>C NMR (125 MHz) spectra of **1j**

7.646  
7.642  
7.638  
7.632  
7.628  
7.626  
7.620  
7.481  
7.452  
7.453  
7.449  
7.445  
7.444  
7.440  
7.433  
7.432  
7.426  
7.422  
7.419  
7.414  
7.409  
7.401  
7.397  
7.394  
7.391  
7.386  
7.378  
7.374  
7.370  
7.367  
7.360  
7.351  
7.012  
7.010  
7.009  
7.007  
6.996  
6.994  
6.992  
6.991  
6.982  
6.960  
6.957  
6.955  
6.946  
6.943  
6.941  
6.938  
6.936  
6.305  
6.284  
6.271  
6.250  
5.731  
5.697  
5.518  
5.496  
3.796

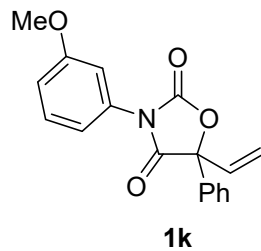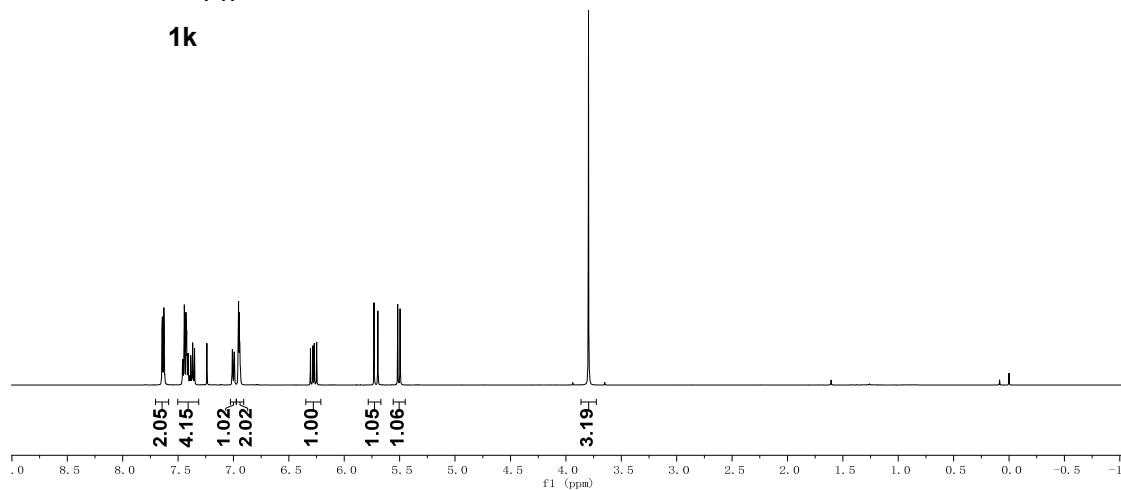

LK-4-103-JOME. 11.fid

170.633  
160.222  
152.983  
134.818  
133.534  
131.722  
129.468  
128.040  
125.422  
118.361  
117.881  
115.042  
111.467  
87.214  
55.552

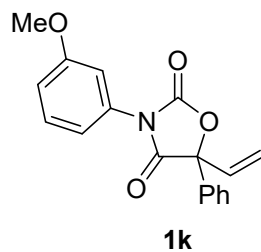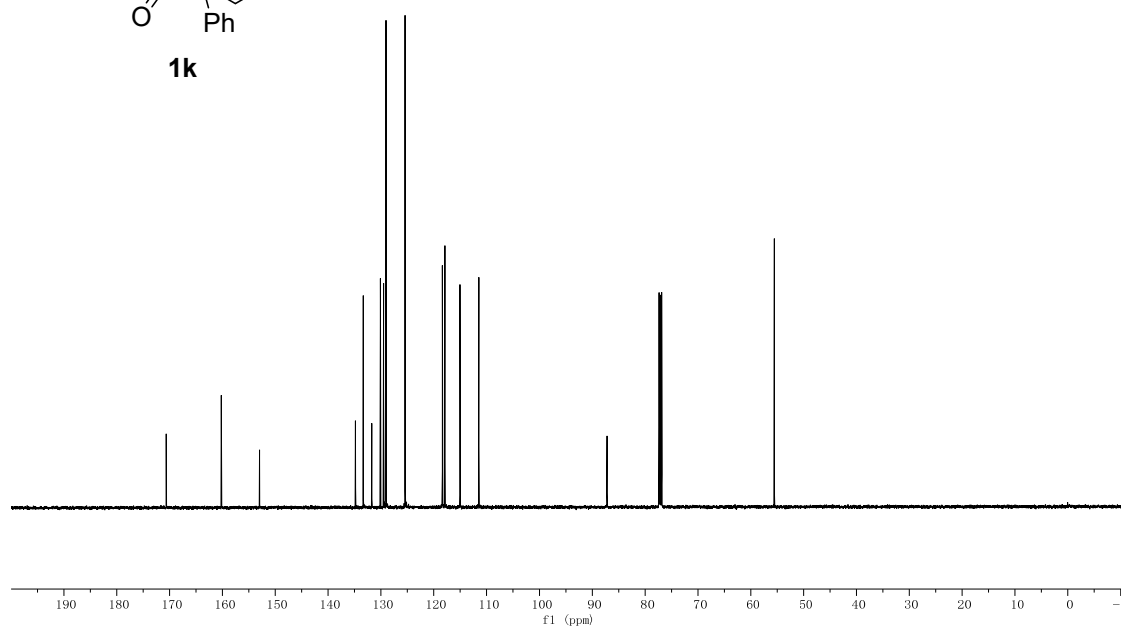

<sup>1</sup>H NMR (500 MHz) and <sup>13</sup>C NMR (125 MHz) spectra of **1k**



LK-4  
 7.643  
 7.640  
 7.636  
 7.630  
 7.625  
 7.622  
 7.458  
 7.454  
 7.450  
 7.446  
 7.441  
 7.438  
 7.436  
 7.429  
 7.426  
 7.423  
 7.419  
 7.416  
 7.411  
 7.406  
 7.402  
 7.322  
 7.315  
 7.310  
 7.301  
 7.297  
 7.290  
 6.986  
 6.980  
 6.975  
 6.966  
 6.962  
 6.955  
 6.302  
 6.280  
 6.267  
 6.246  
 5.726  
 5.692  
 5.510  
 5.489  
 3.808

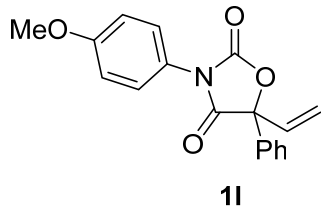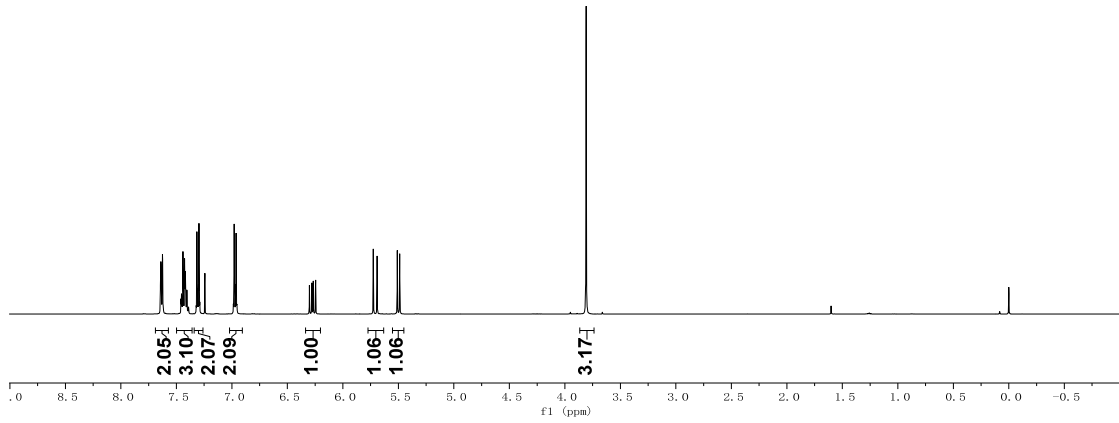

LK-4-84-DOME.12.fid

170.926  
 159.862  
 153.396  
 134.886  
 133.398  
 129.457  
 129.017  
 127.167  
 125.417  
 125.404  
 123.300  
 118.268  
 114.647  
 87.273  
 55.569

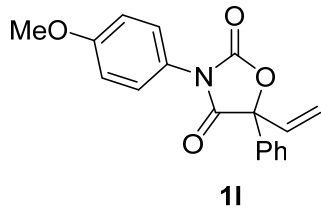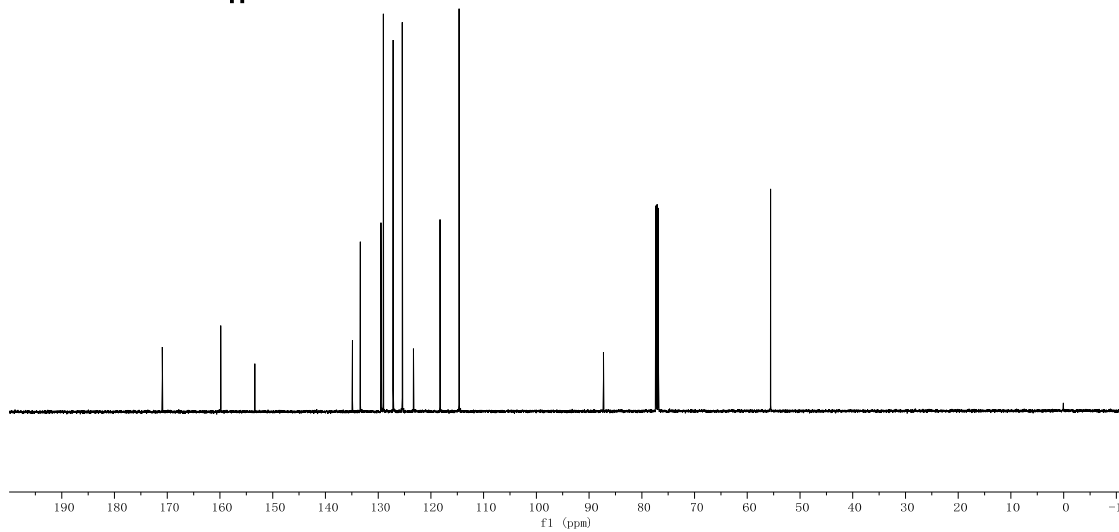

$^1\text{H}$  NMR (500 MHz) and  $^{13}\text{C}$  NMR (125 MHz) spectra of **11**



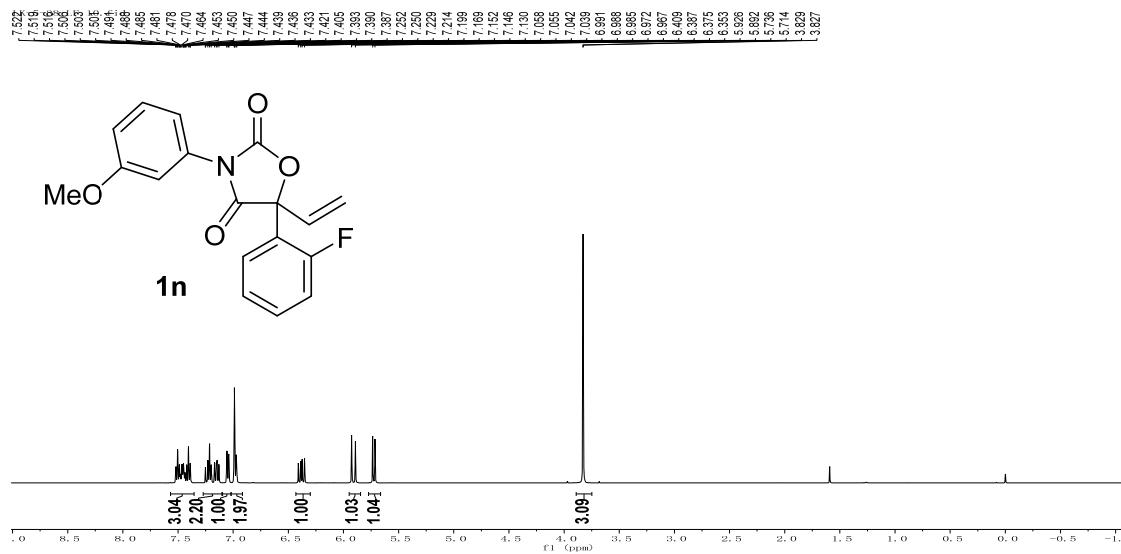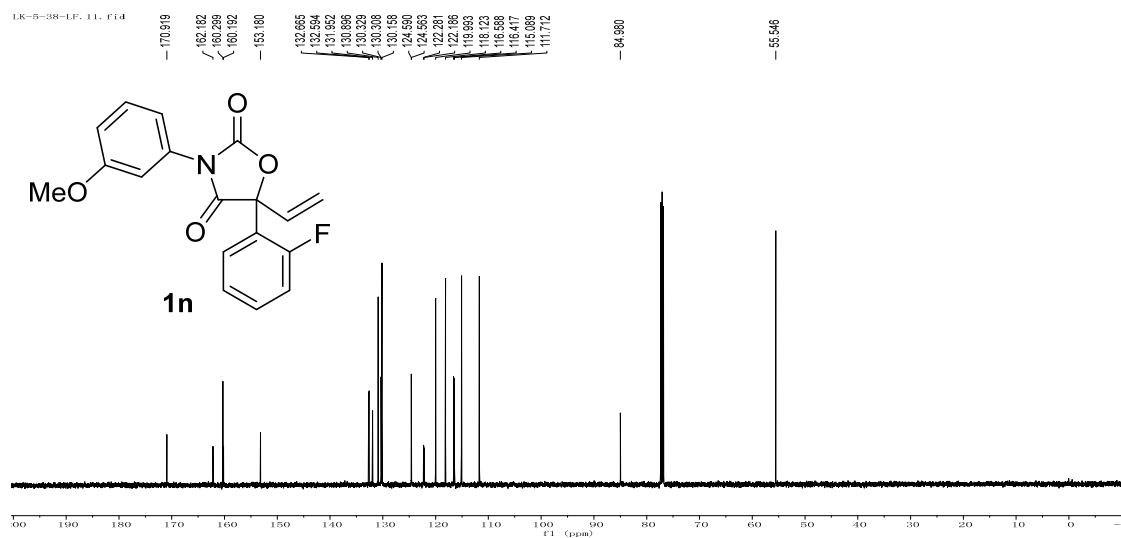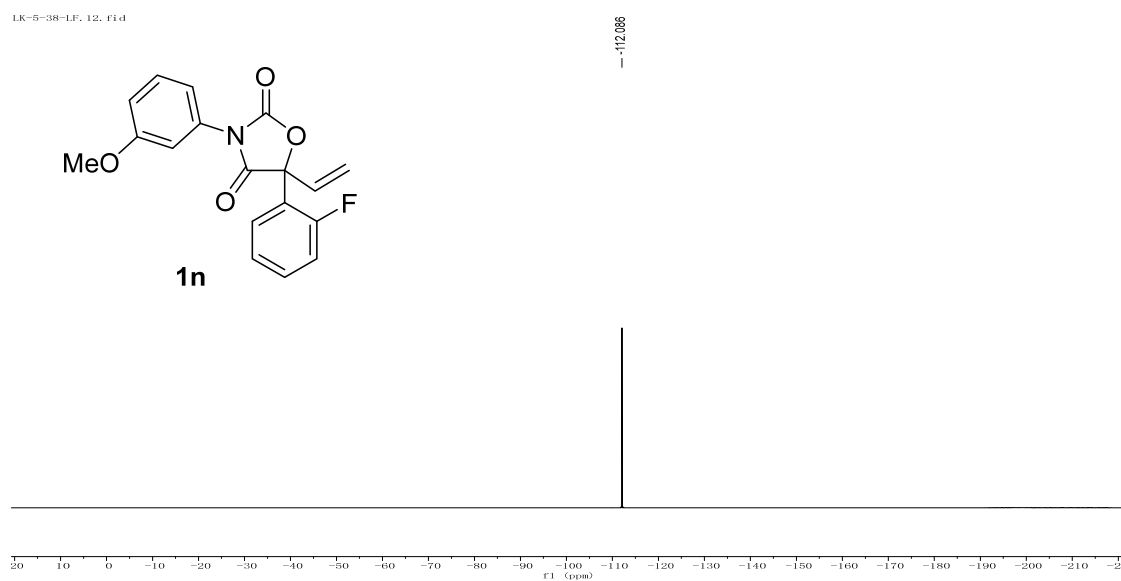

$^1\text{H}$  NMR (500 MHz)  $^{13}\text{C}$  NMR (125 MHz) and  $^{19}\text{F}$  NMR (470 MHz) spectra of **1n**

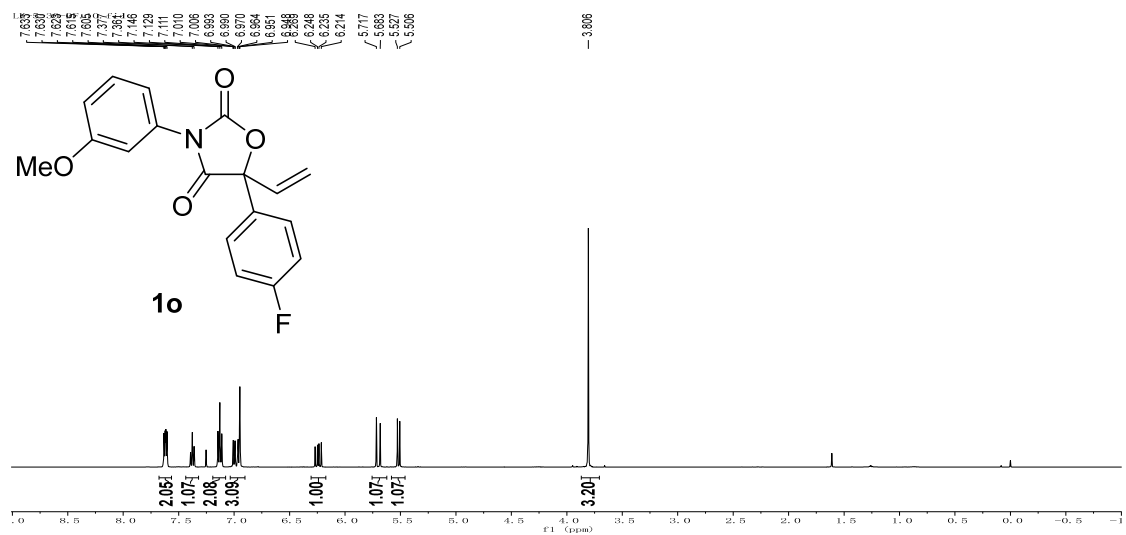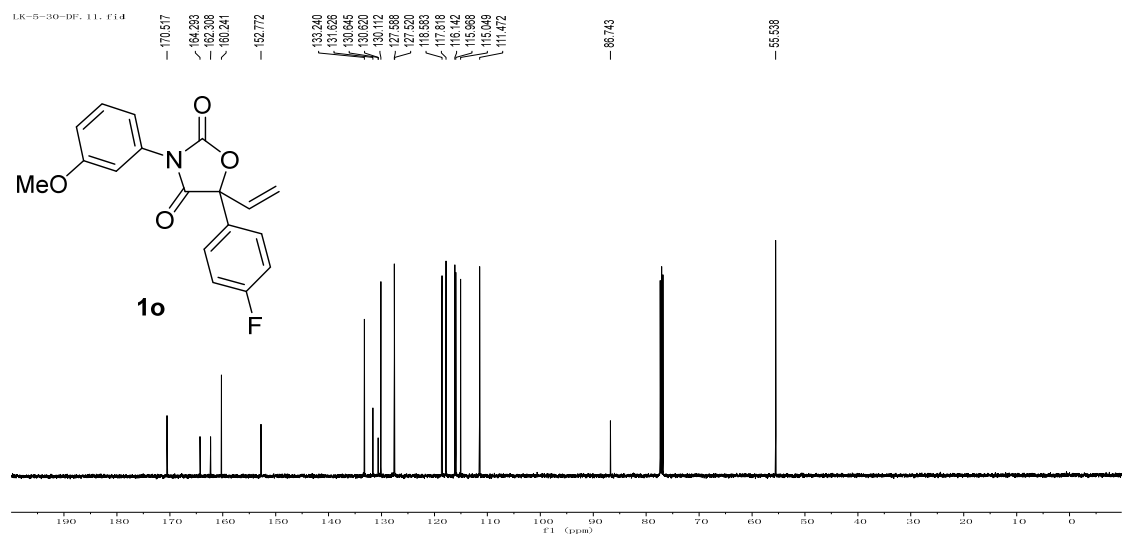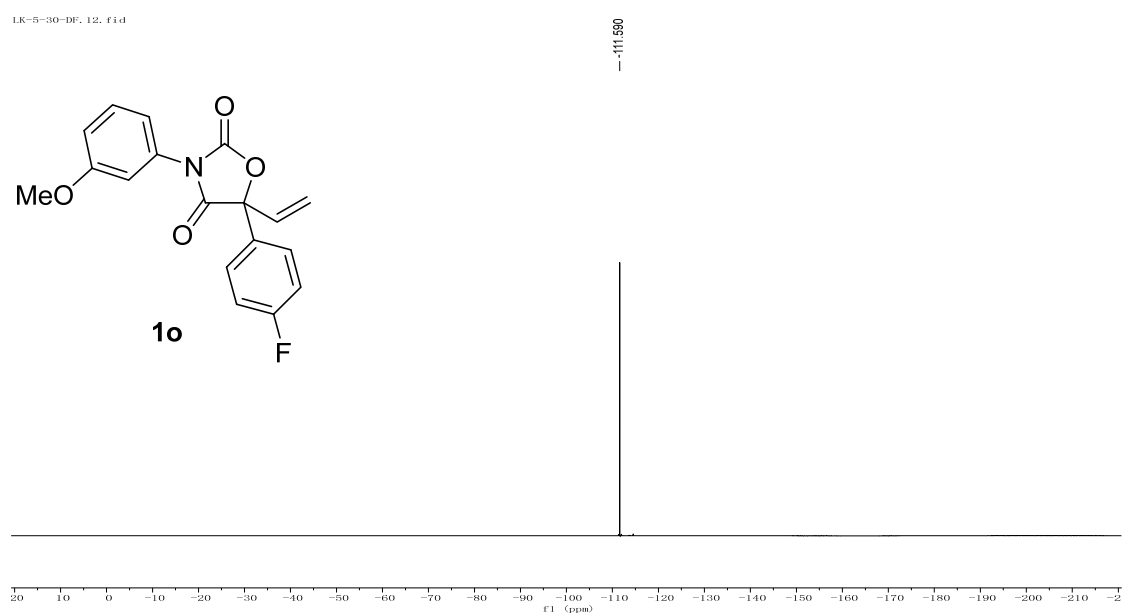

$^1\text{H}$  NMR (500 MHz)  $^{13}\text{C}$  NMR (125 MHz) and  $^{19}\text{F}$  NMR (470 MHz) spectra of **1o**

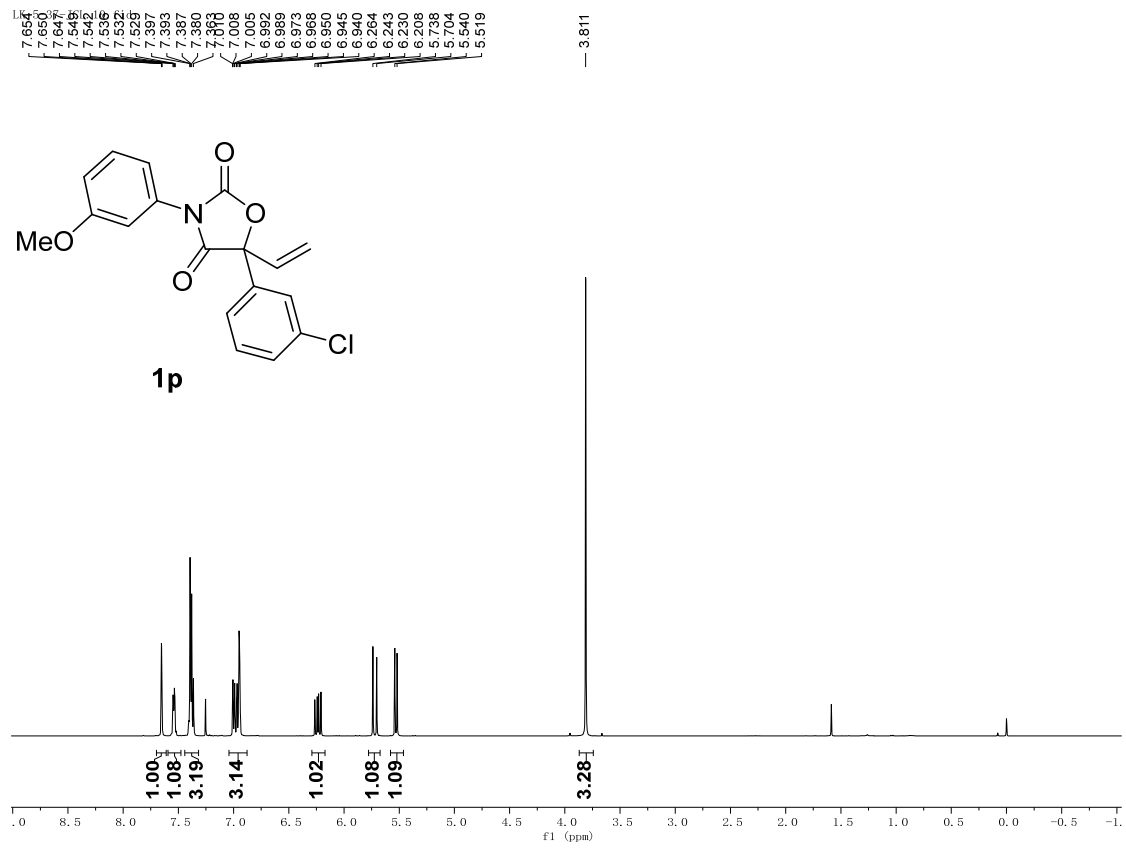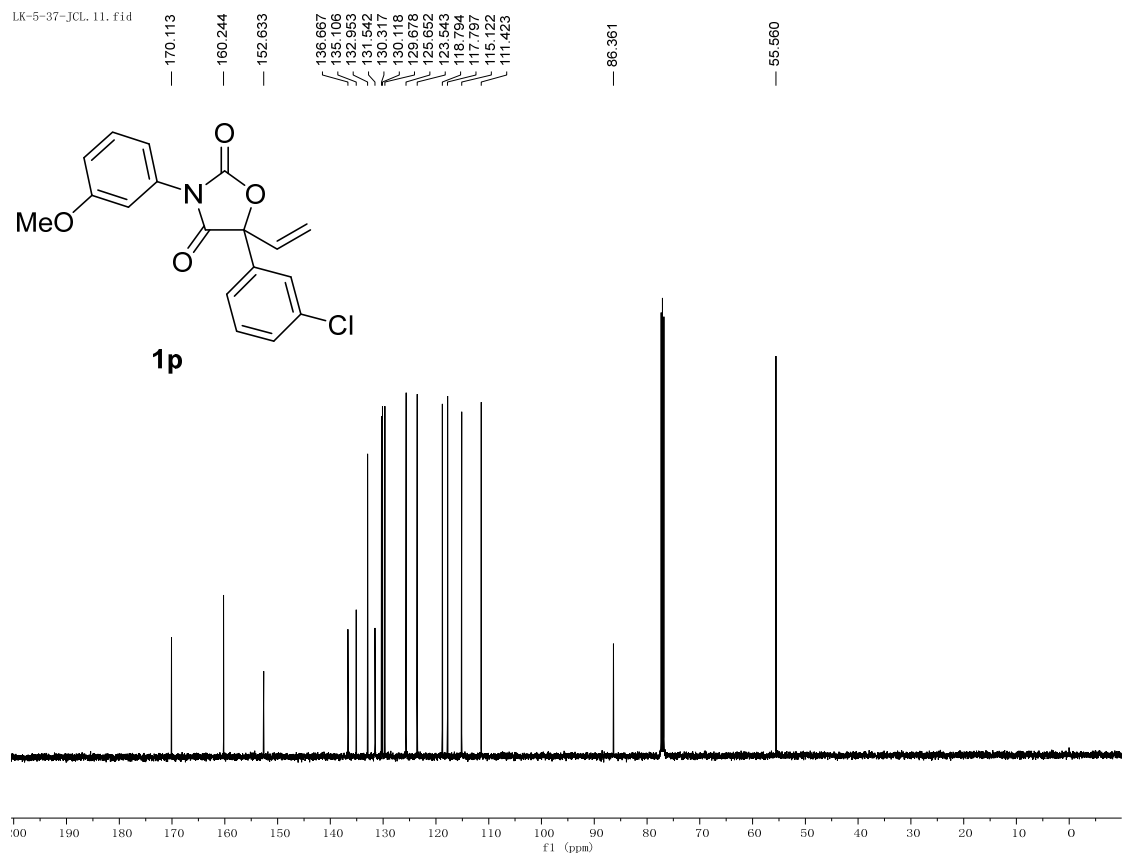

<sup>1</sup>H NMR (500 MHz) and <sup>13</sup>C NMR (125 MHz) spectra of **1p**

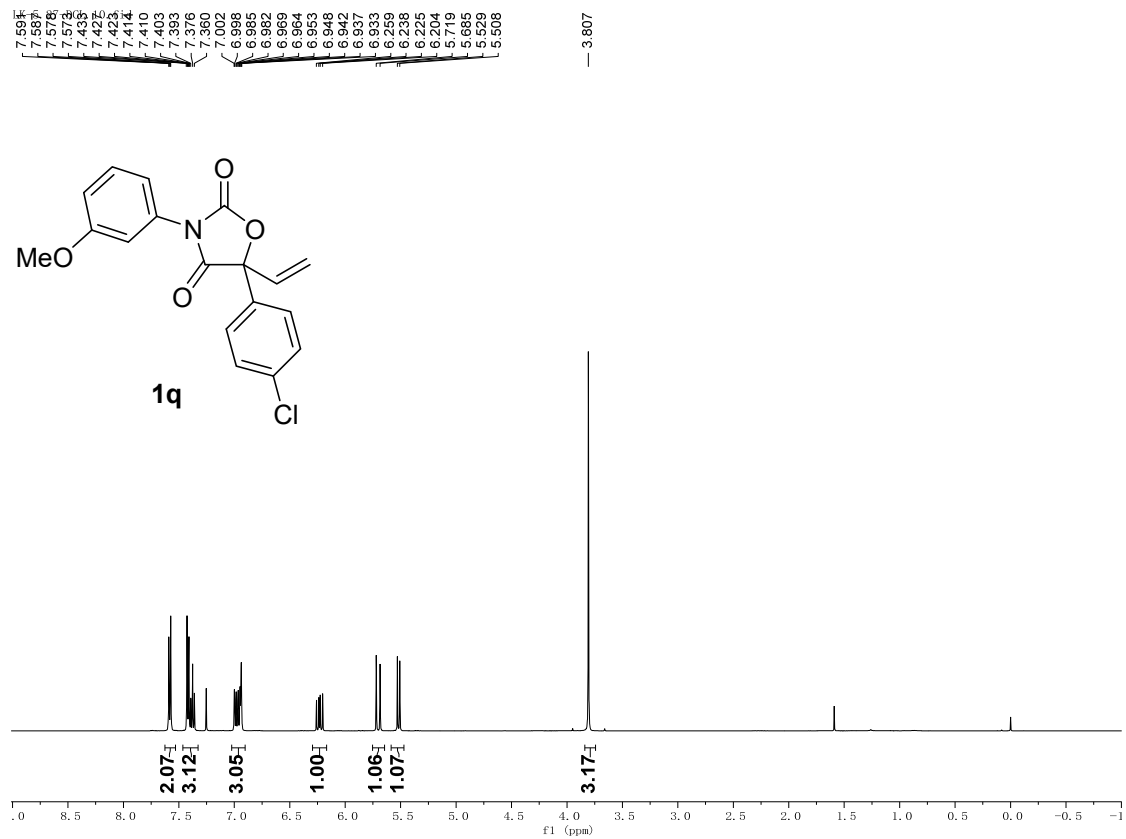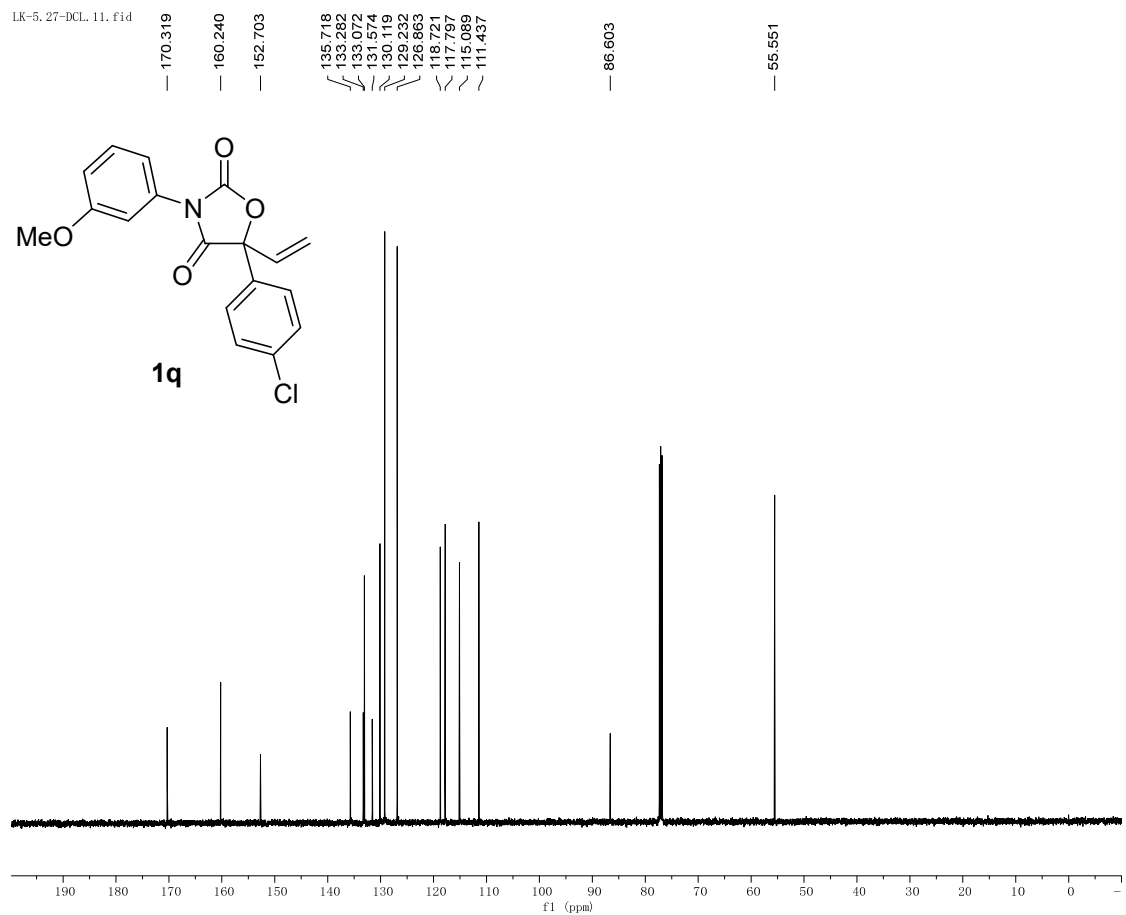

$^1\text{H}$  NMR (500 MHz) and  $^{13}\text{C}$  NMR (125 MHz) spectra of **1q**

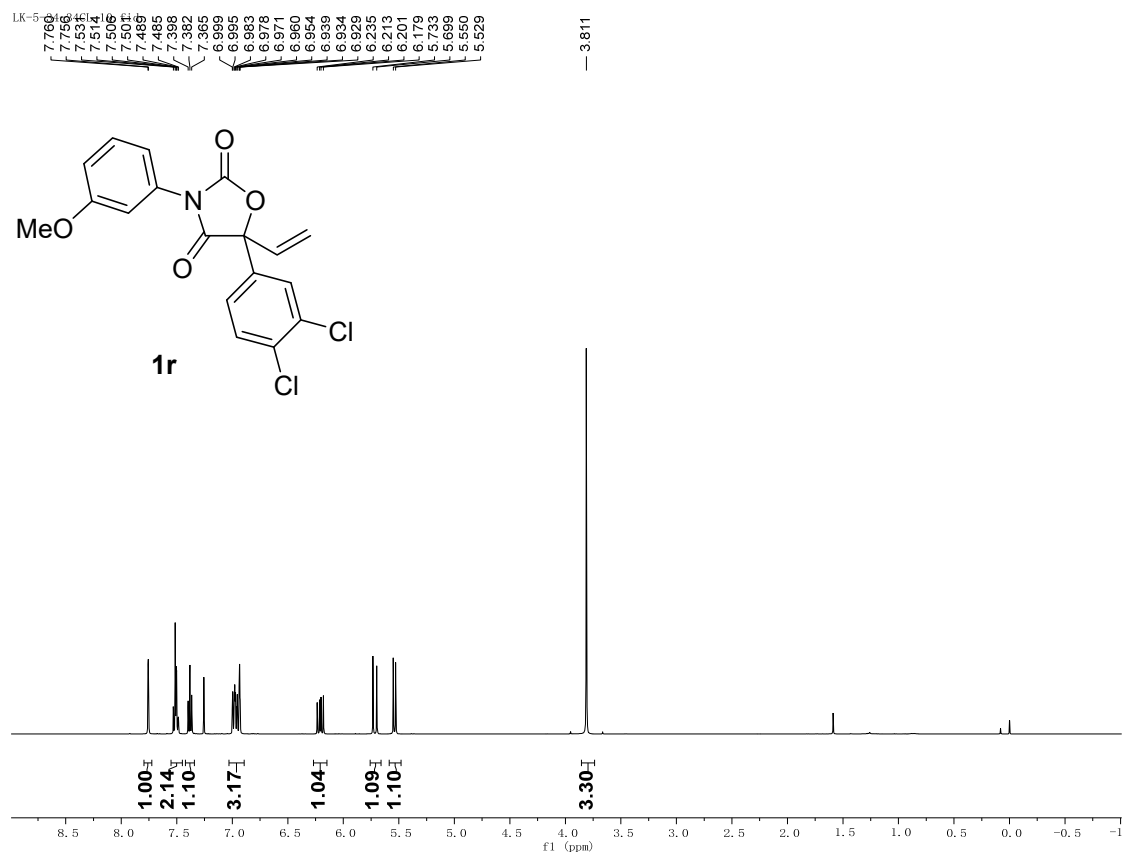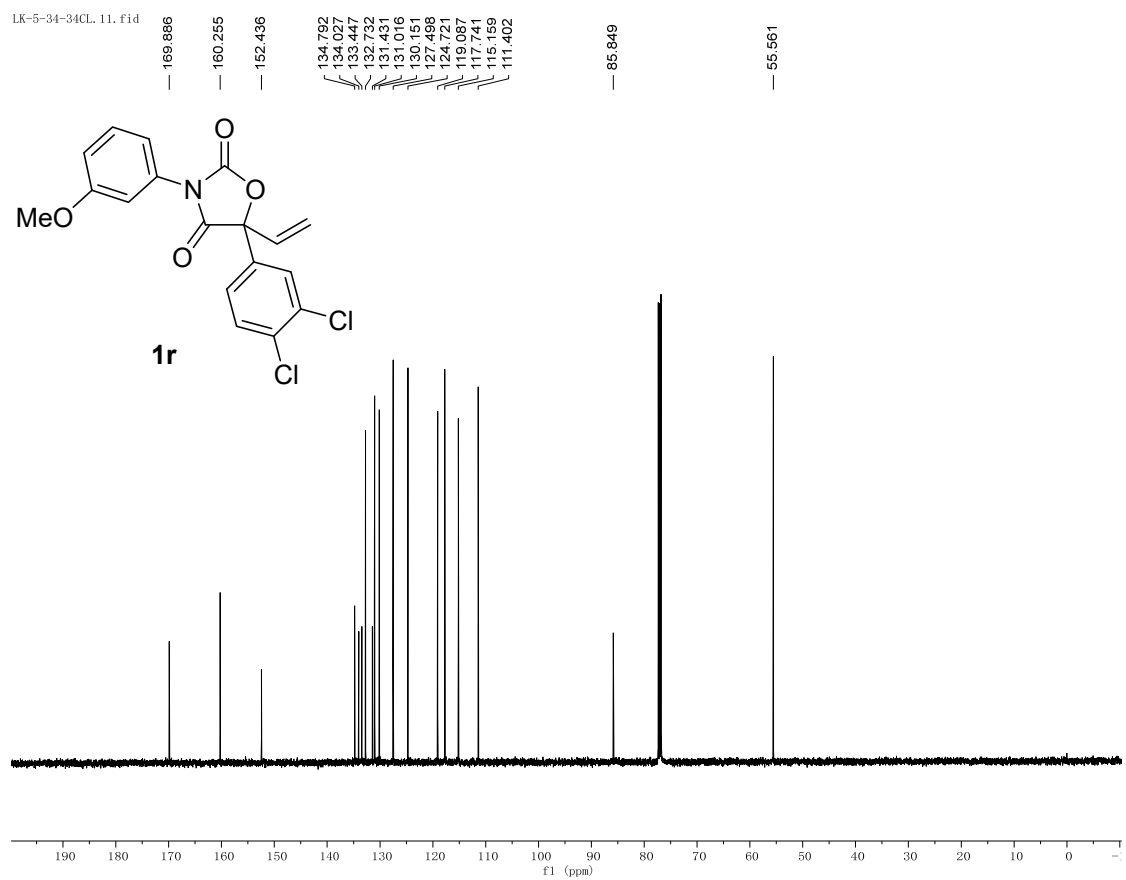

$^1\text{H}$  NMR (500 MHz) and  $^{13}\text{C}$  NMR (125 MHz) spectra of **1r**

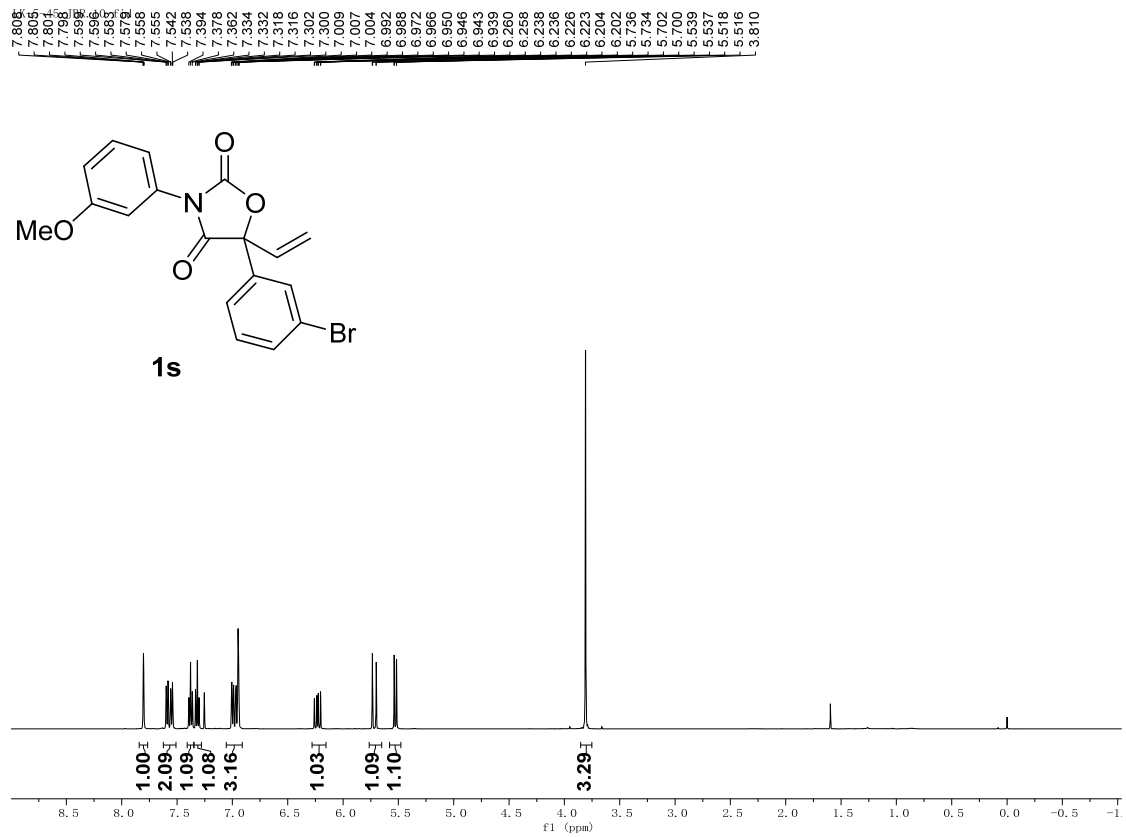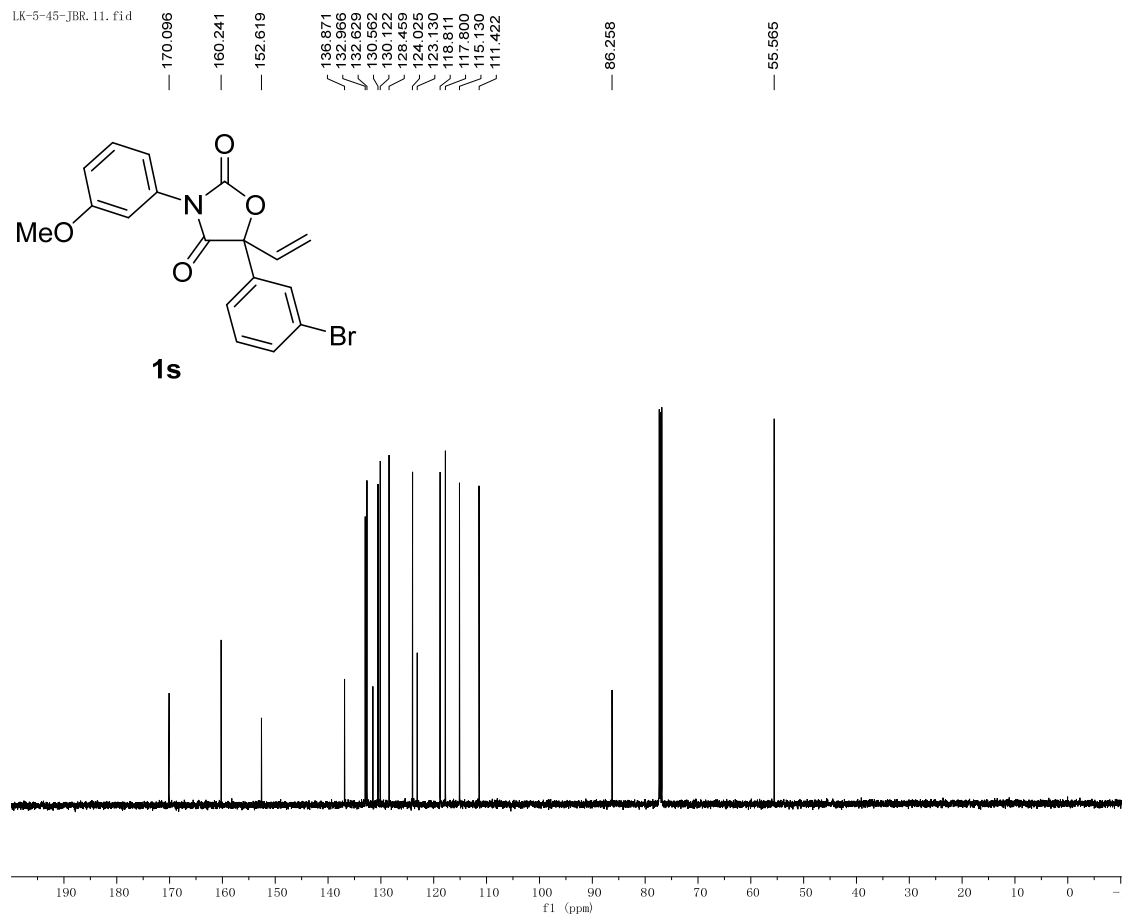

$^1\text{H}$  NMR (500 MHz) and  $^{13}\text{C}$  NMR (125 MHz) spectra of **1s**



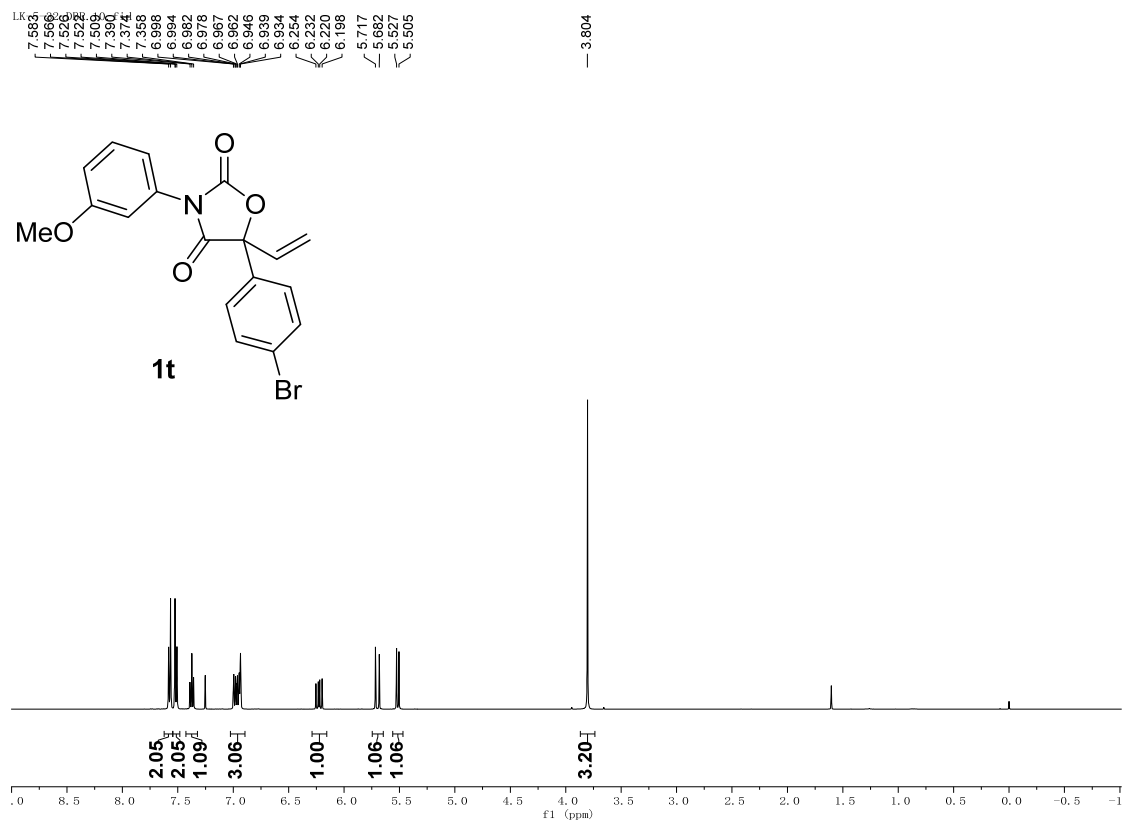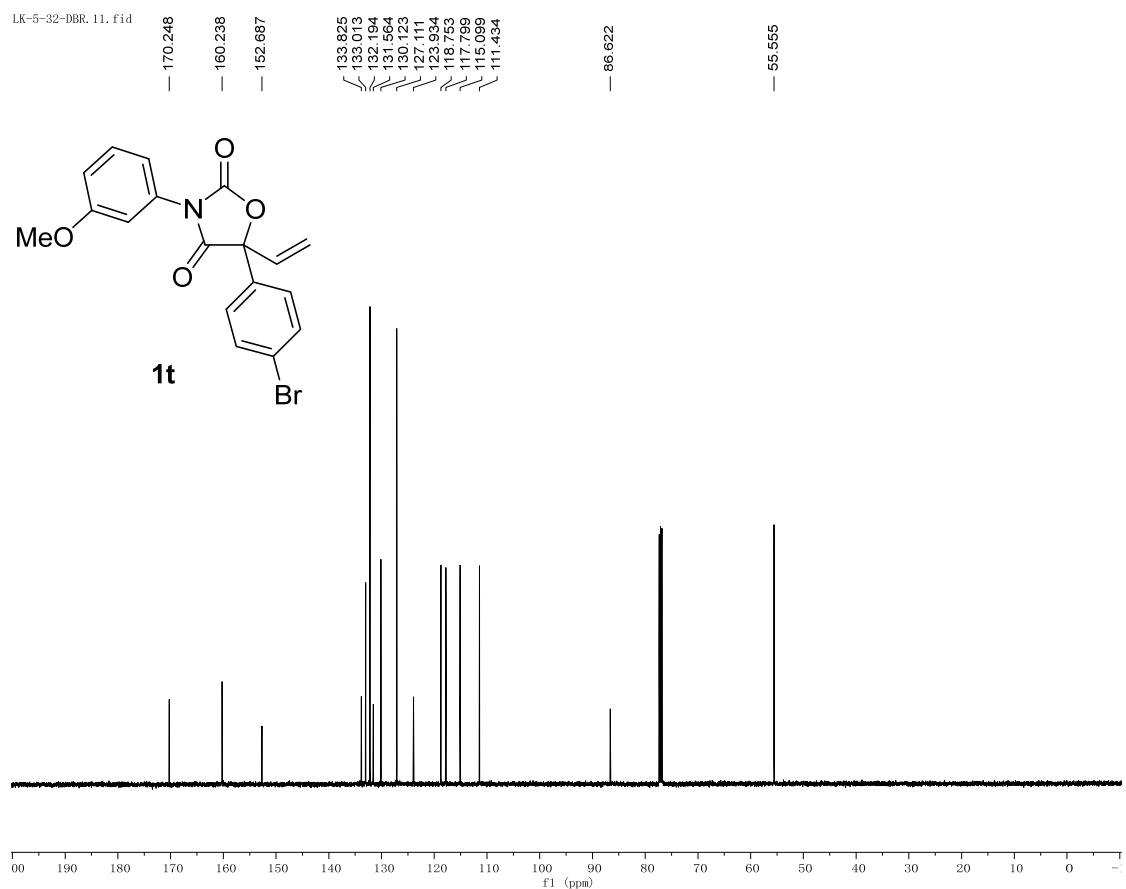

$^1\text{H}$  NMR (500 MHz) and  $^{13}\text{C}$  NMR (125 MHz) spectra of **1t**

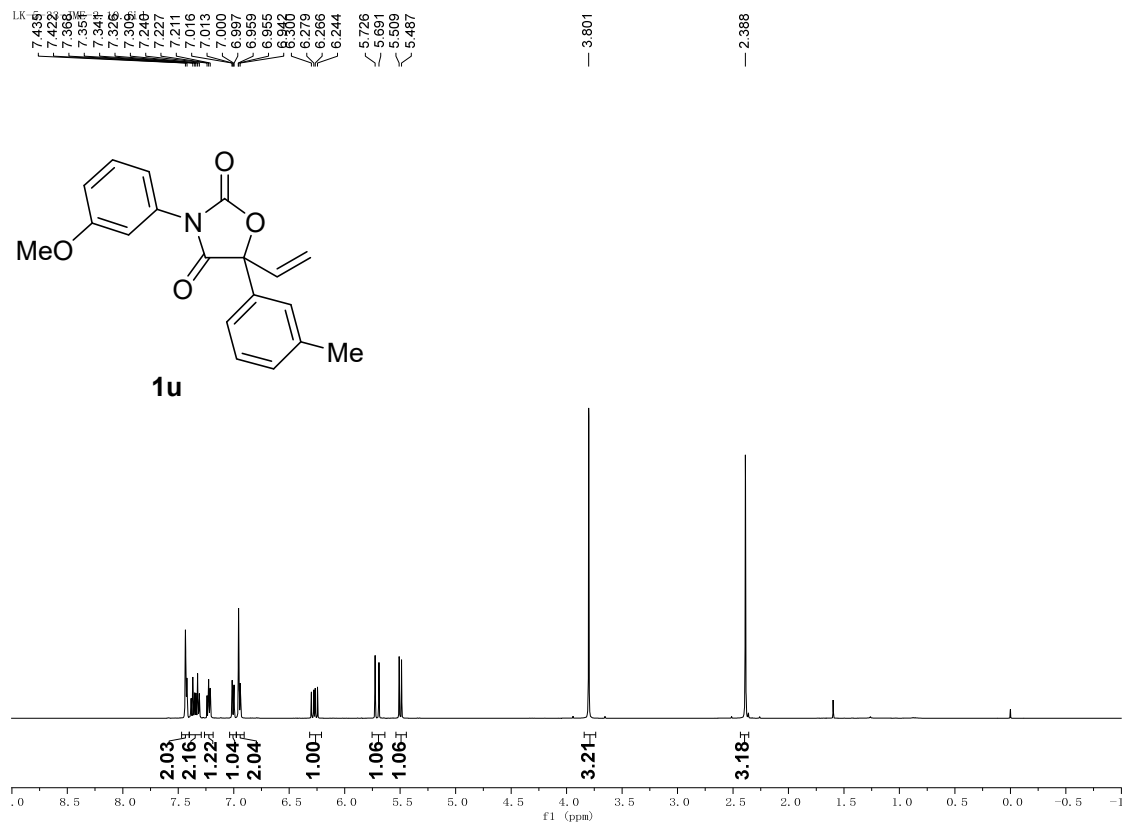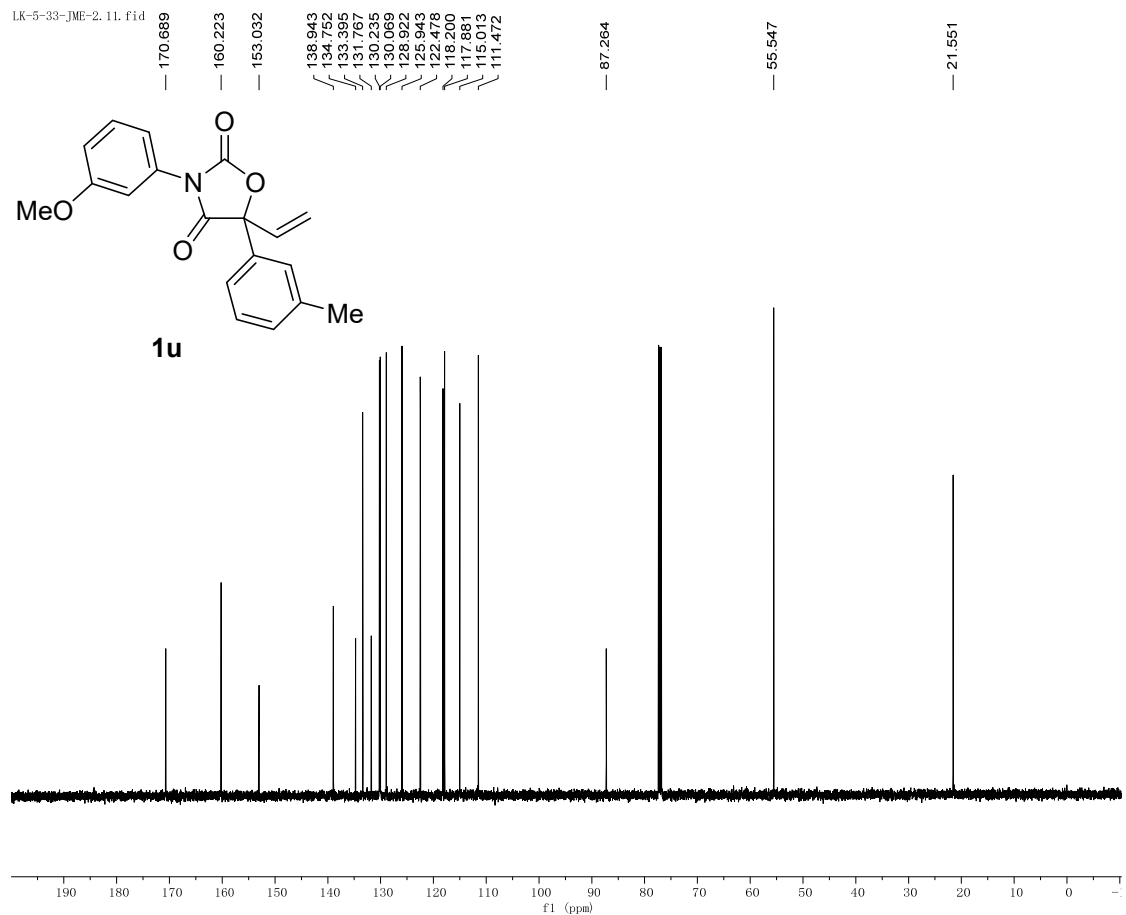

<sup>1</sup>H NMR (500 MHz) and <sup>13</sup>C NMR (125 MHz) spectra of **1u**

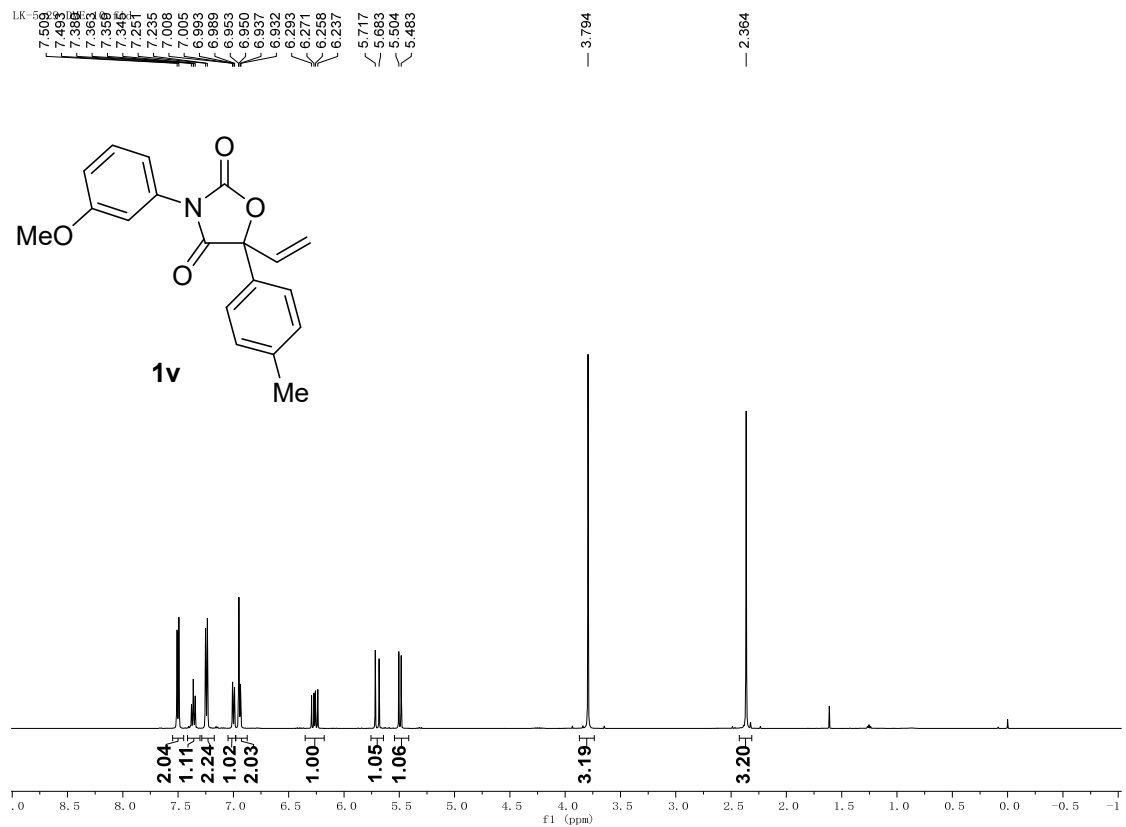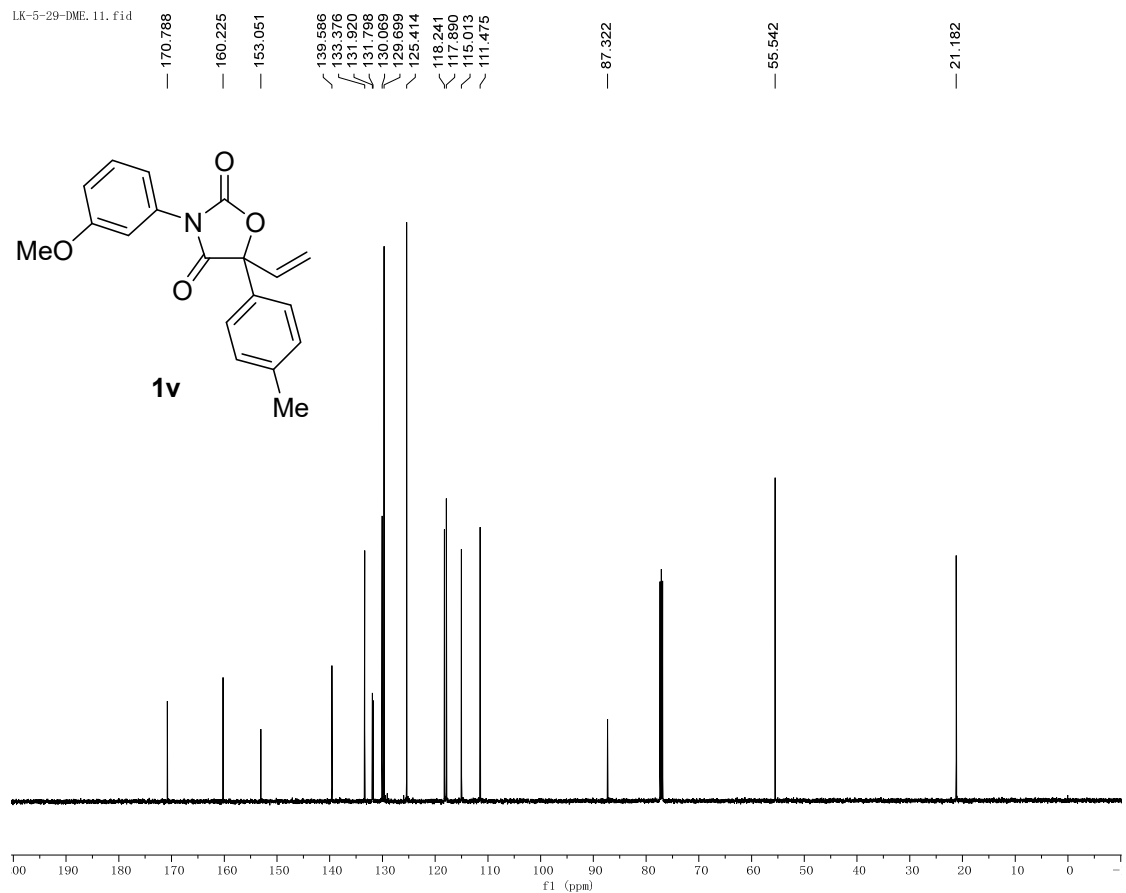

<sup>1</sup>H NMR (500 MHz) and <sup>13</sup>C NMR (125 MHz) spectra of **1v**

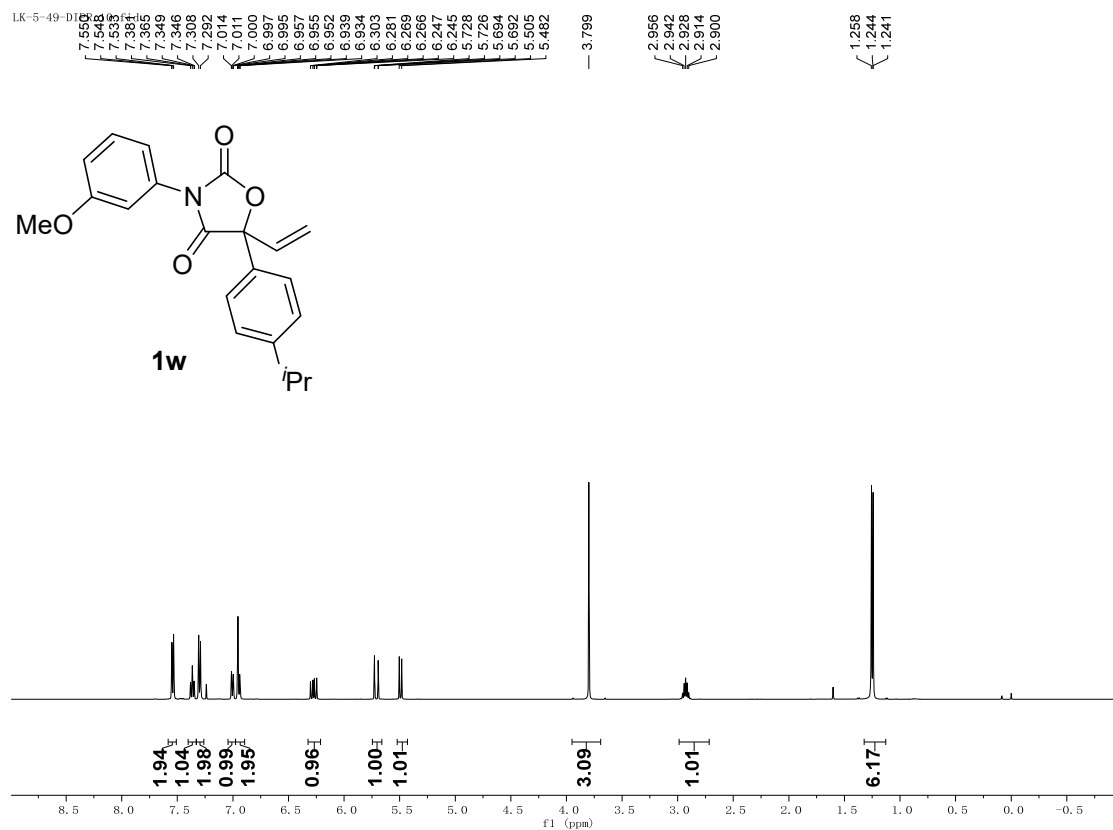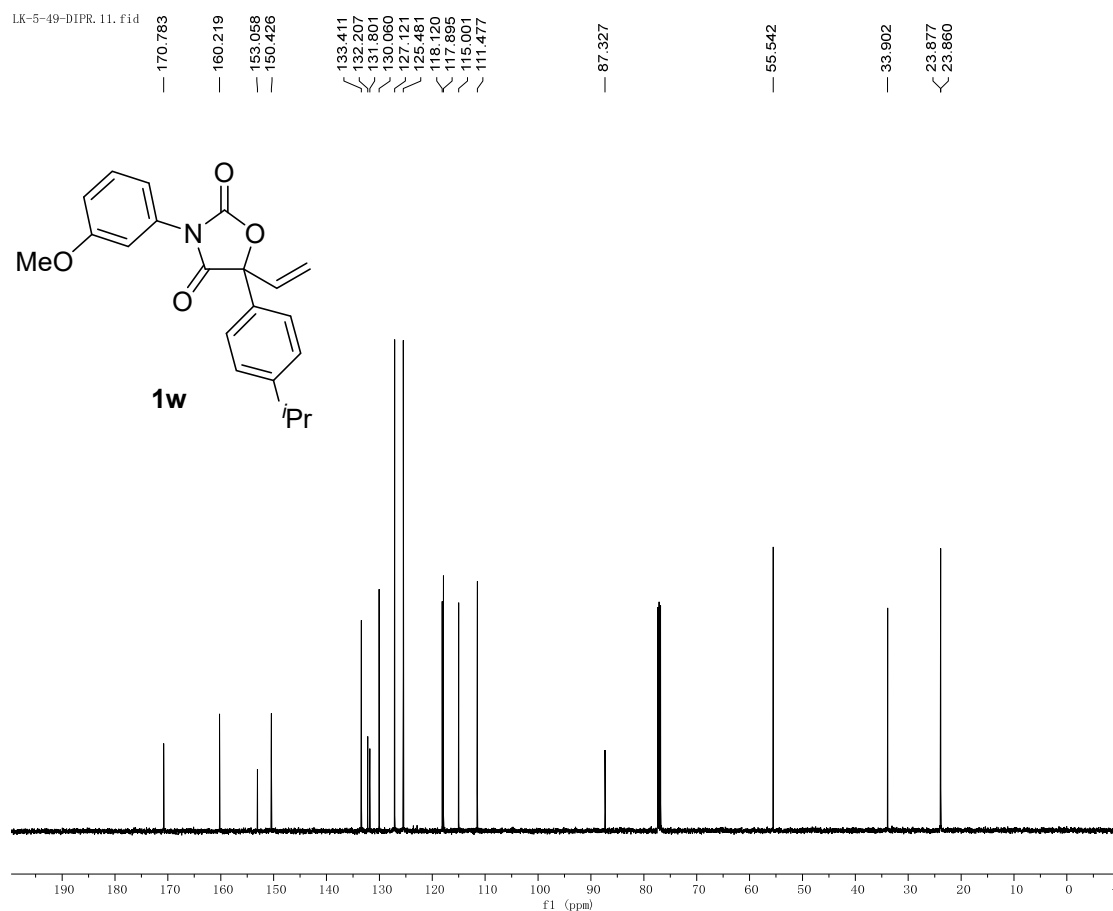

$^1\text{H}$  NMR (500 MHz) and  $^{13}\text{C}$  NMR (125 MHz) spectra of **1w**

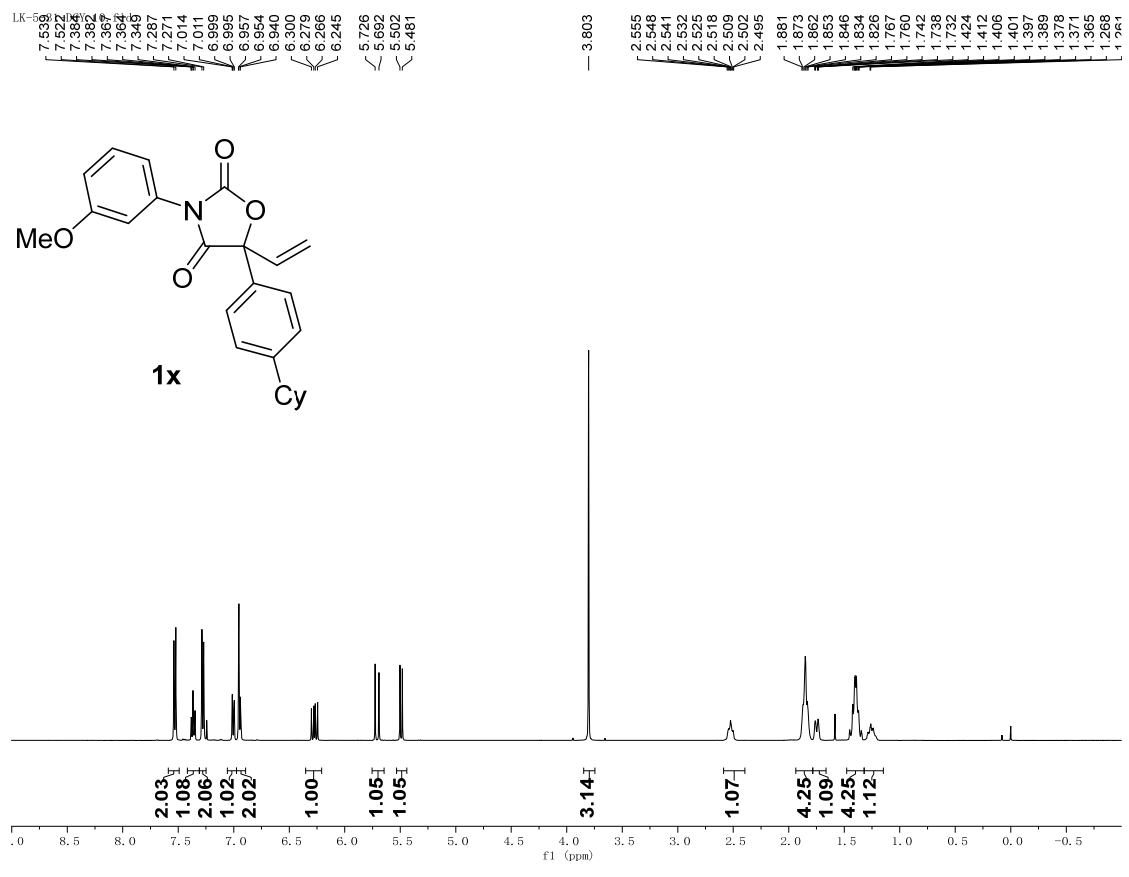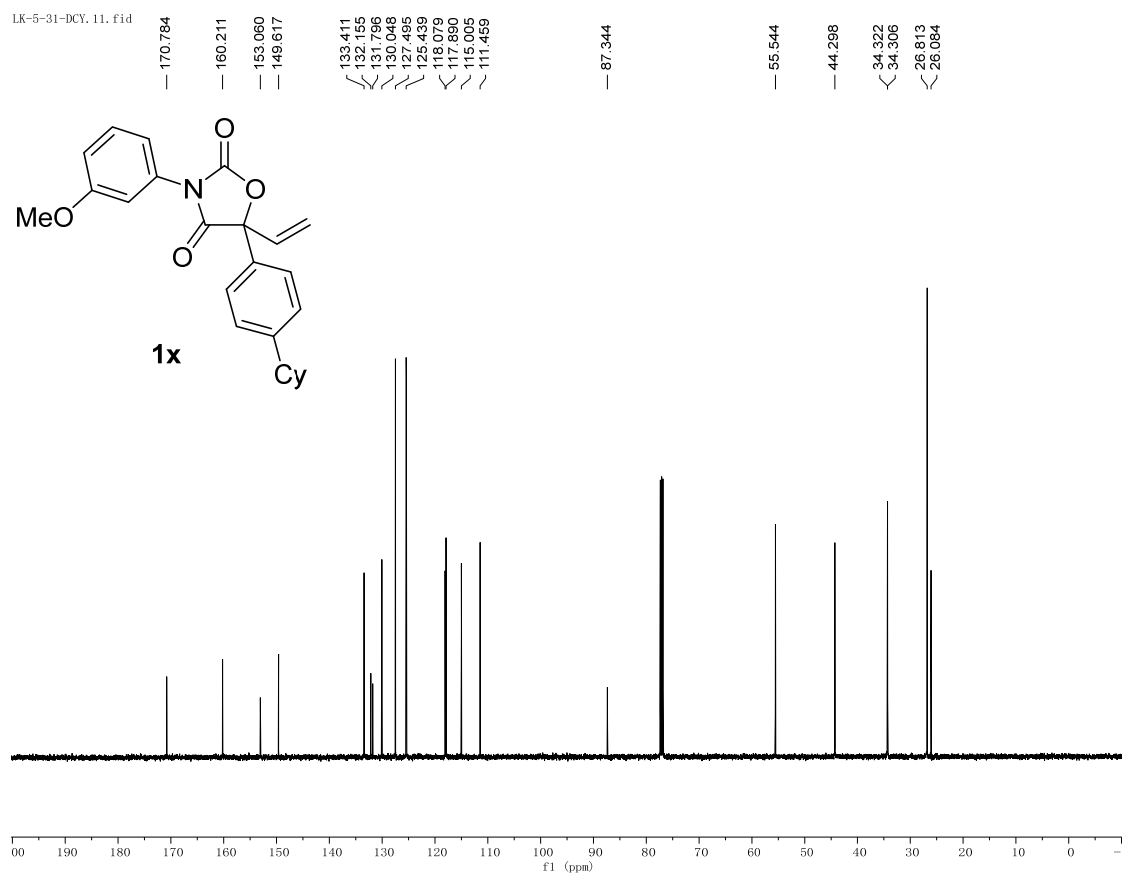

<sup>1</sup>H NMR (500 MHz) and <sup>13</sup>C NMR (125 MHz) spectra of **1x**

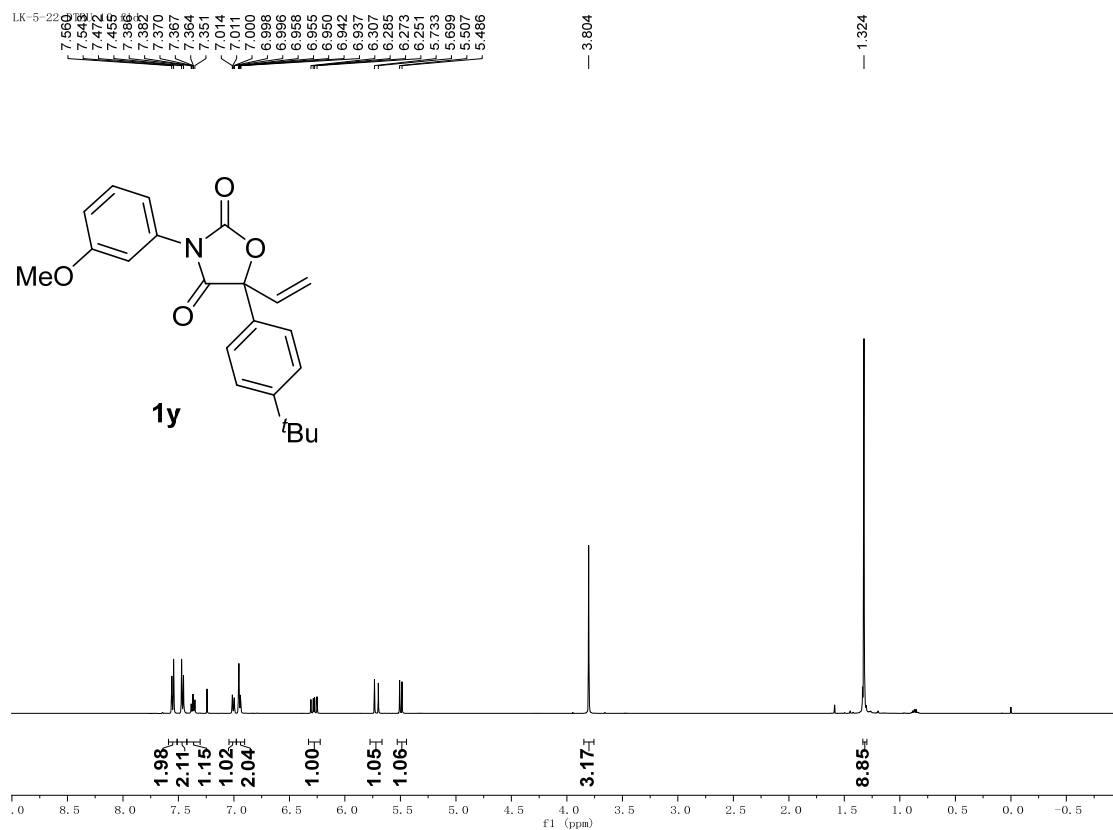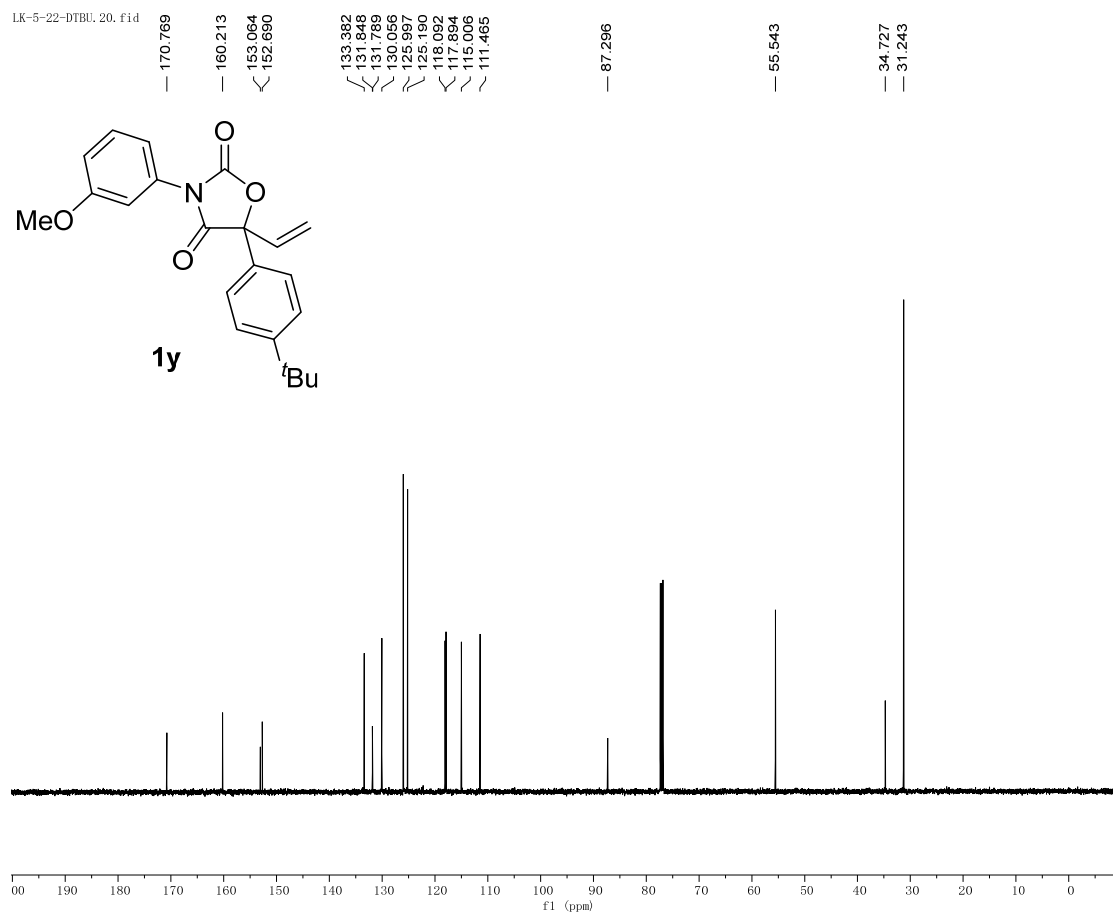

<sup>1</sup>H NMR (500 MHz) and <sup>13</sup>C NMR (125 MHz) spectra of **1y**

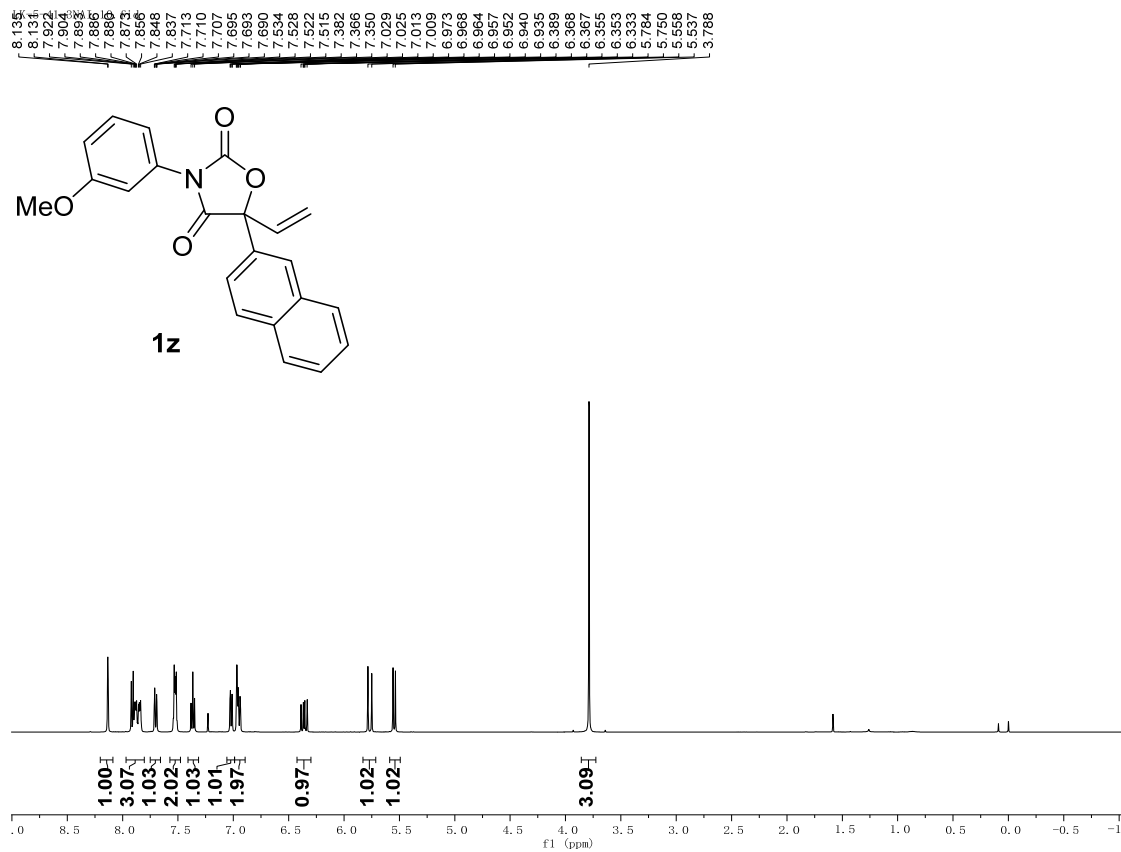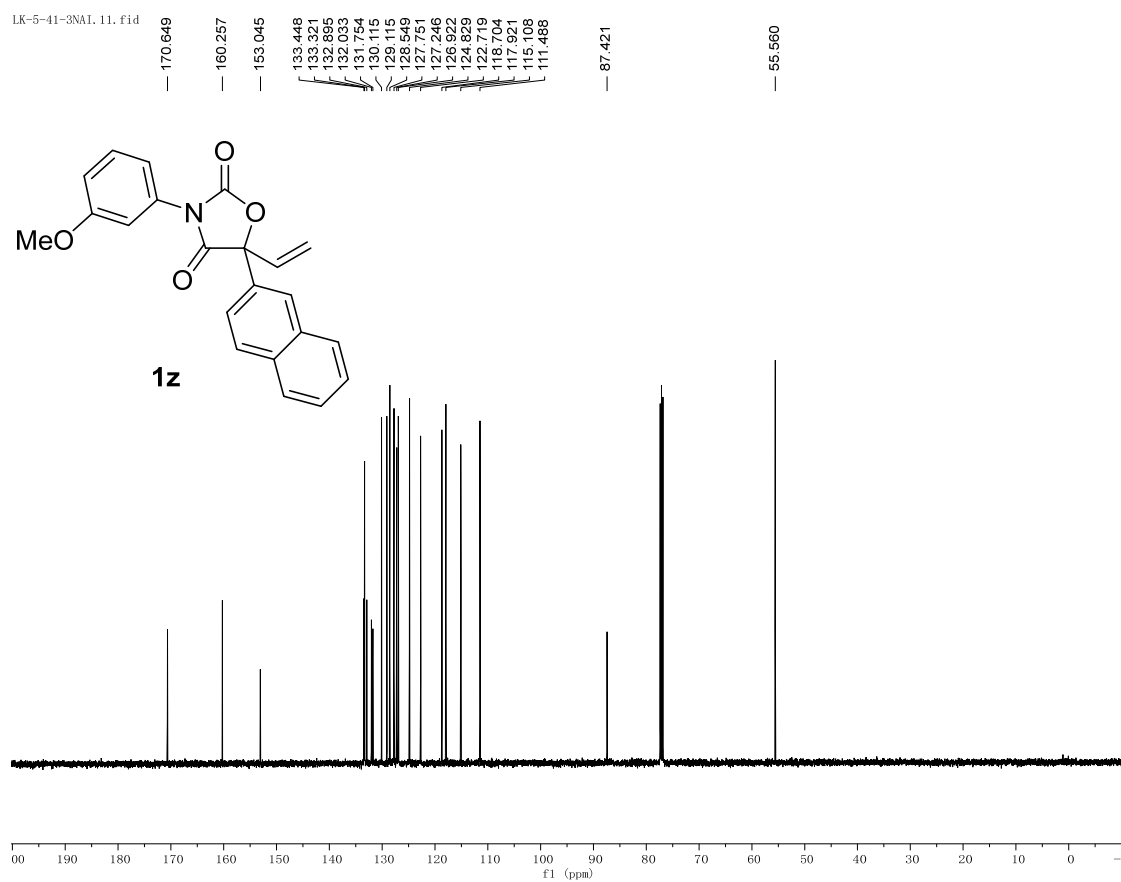

$^1\text{H}$  NMR (500 MHz) and  $^{13}\text{C}$  NMR (125 MHz) spectra of **1z**

LK-5-58  
 7.543  
 7.540  
 7.537  
 7.415  
 7.409  
 7.404  
 7.398  
 7.394  
 7.378  
 7.375  
 7.359  
 7.249  
 7.239  
 7.236  
 7.226  
 7.020  
 7.018  
 7.016  
 7.014  
 7.004  
 7.002  
 7.000  
 6.998  
 6.967  
 6.964  
 6.962  
 6.959  
 6.954  
 6.851  
 6.849  
 6.846  
 6.279  
 6.257  
 6.245  
 6.223  
 5.702  
 5.668  
 5.507  
 5.486  
 3.807

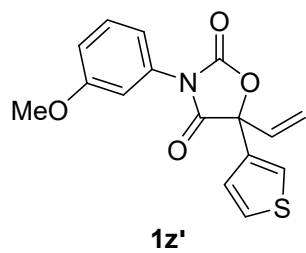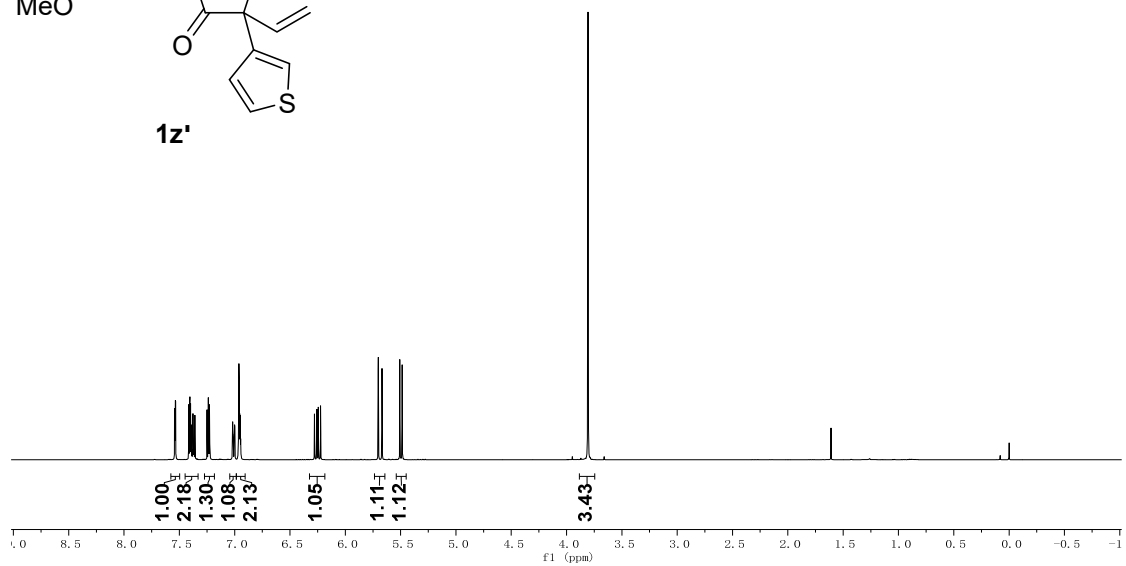

LK-5-58-SF. 11. fid

170.326  
 160.232  
 152.913  
 135.272  
 132.798  
 131.709  
 130.101  
 127.509  
 125.202  
 123.472  
 118.509  
 117.836  
 115.041  
 111.455  
 85.894  
 55.552

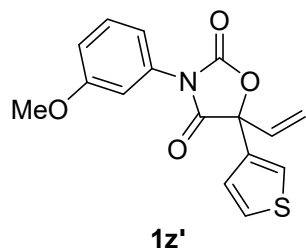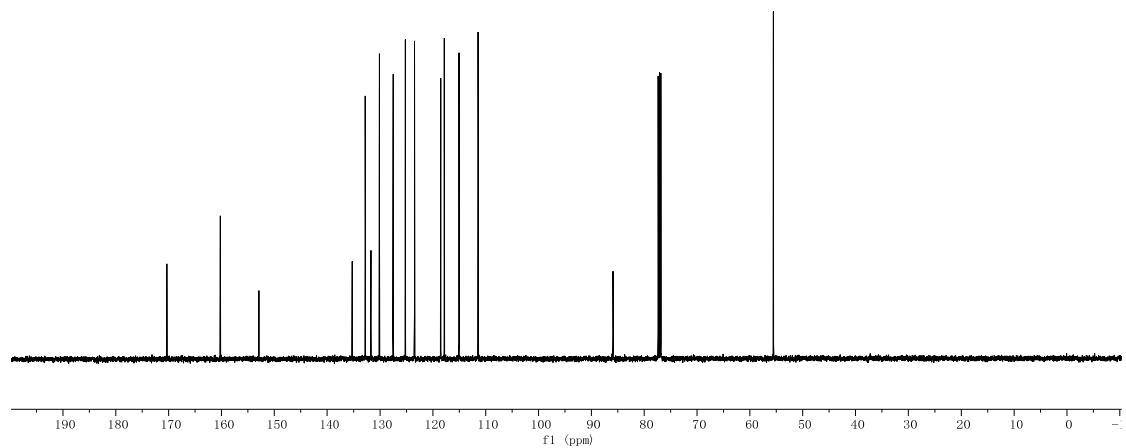

<sup>1</sup>H NMR (500 MHz) and <sup>13</sup>C NMR (125 MHz) spectra of 1z'



7.596  
7.587  
7.583  
7.578  
7.574  
7.571  
7.503  
7.497  
7.470  
7.465  
7.461  
7.452  
7.449  
7.446  
7.441  
7.438  
7.434  
7.431  
7.427  
7.423  
7.421  
7.407  
7.262  
7.256  
7.244  
7.236  
7.234  
7.232  
7.229  
7.221  
7.218  
7.207  
7.203  
7.144  
7.141  
7.138  
7.126  
7.114  
7.111  
7.109  
7.080  
7.068  
7.064  
7.052  
7.037  
6.941  
6.936  
6.927  
6.923  
6.918  
6.914  
6.904  
6.900  
6.884  
6.881  
6.801  
6.797  
6.788  
6.781  
6.768  
6.674  
6.659  
5.106  
5.092  
5.075  
5.062  
4.407  
4.386  
4.376  
4.356  
2.316

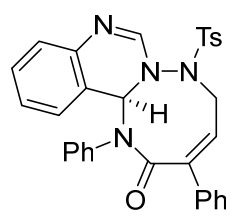

**3aa**

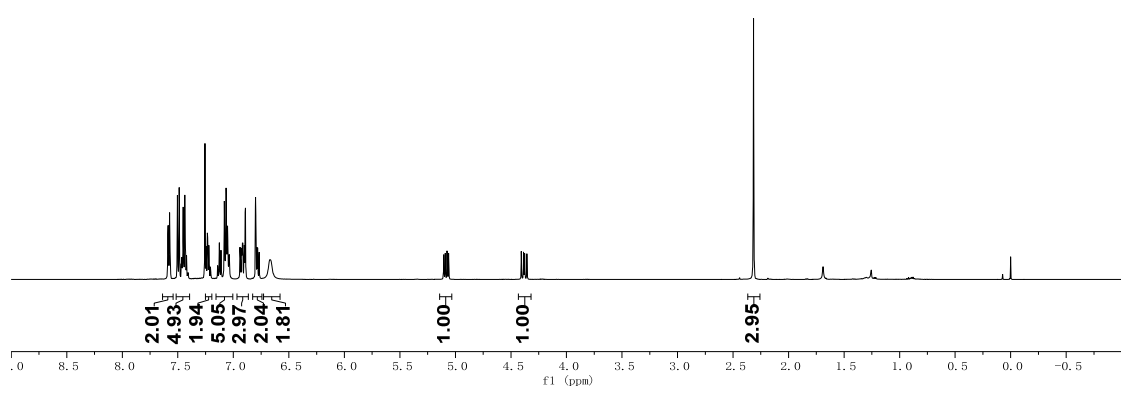

lk-4-143-ph. 11. fid

167.983  
146.467  
145.767  
141.712  
141.024  
136.221  
134.899  
133.034  
129.984  
129.952  
129.475  
129.363  
129.009  
128.861  
128.624  
128.460  
127.048  
126.640  
126.244  
123.948  
123.614  
119.903  
69.716  
49.076  
21.646

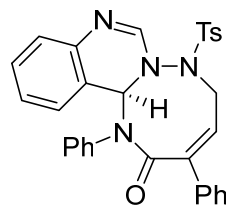

**3aa**

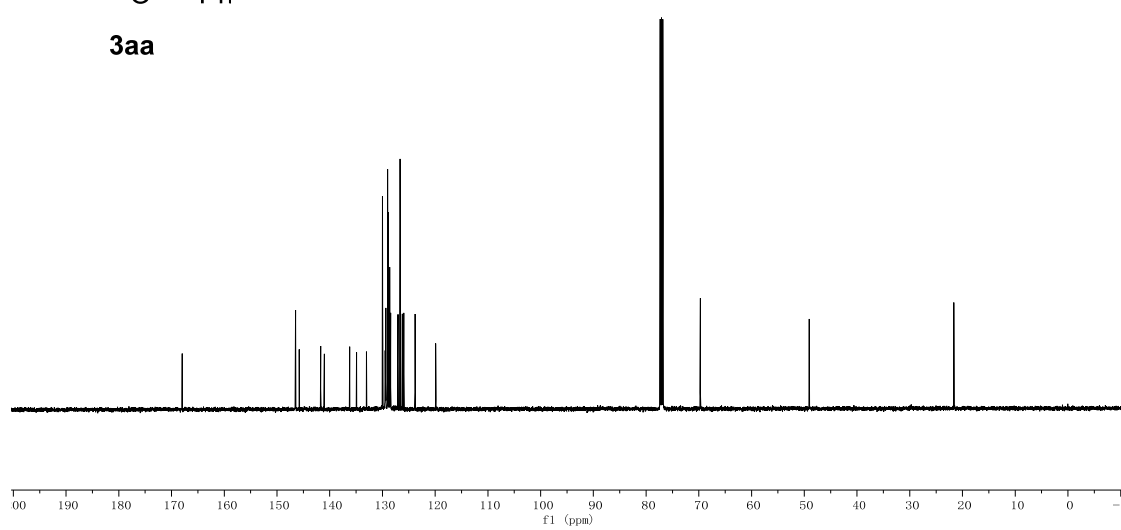

<sup>1</sup>H NMR (500 MHz) and <sup>13</sup>C NMR (125 MHz) spectra of 3aa

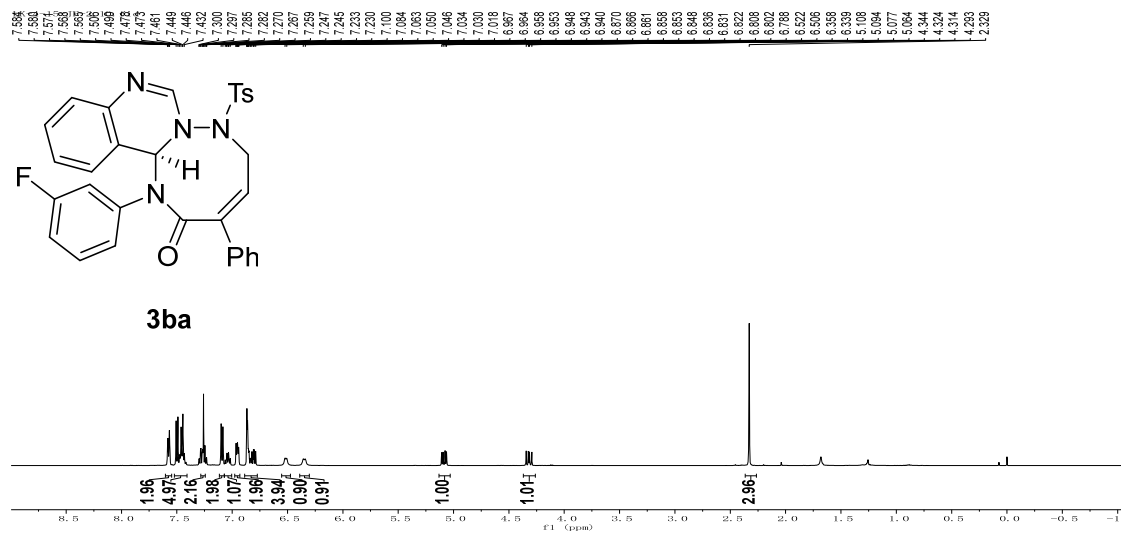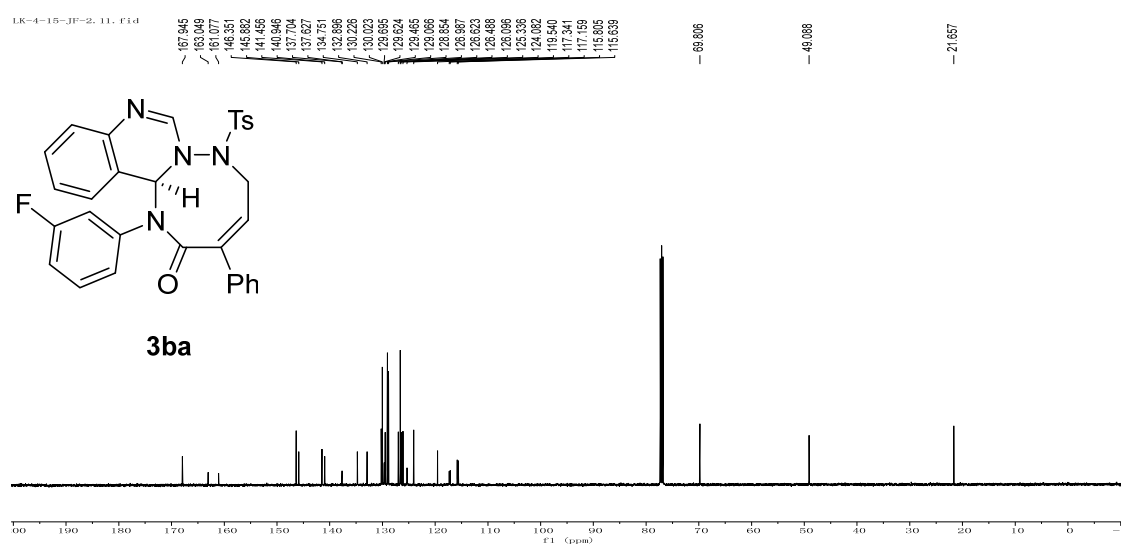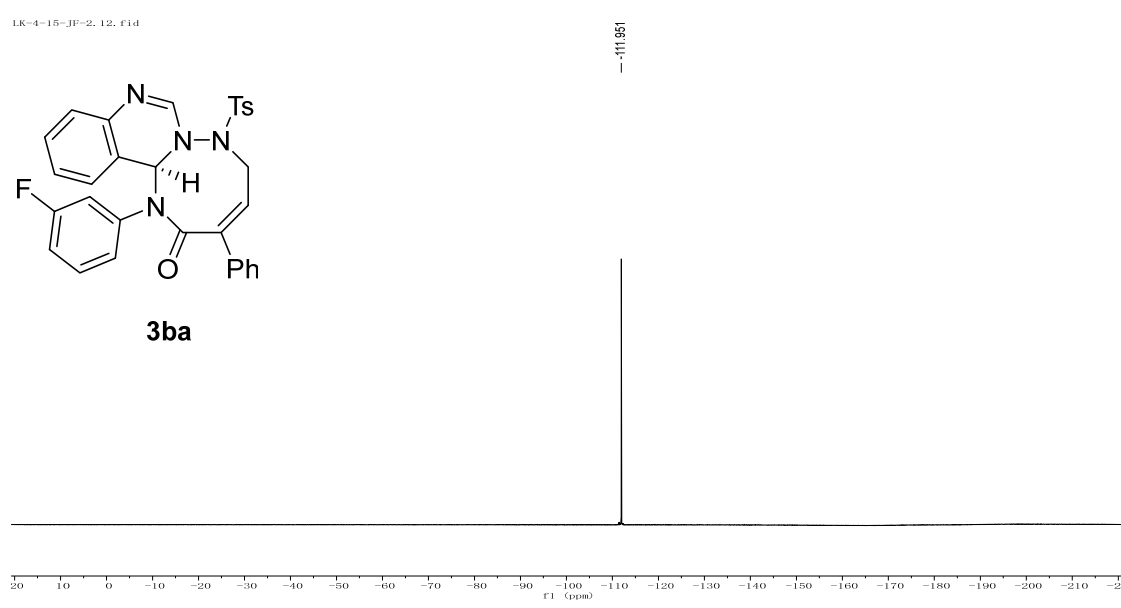

<sup>1</sup>H NMR (500 MHz), <sup>13</sup>C NMR (125 MHz) and <sup>19</sup>F NMR (470 MHz) spectra of **3ba**

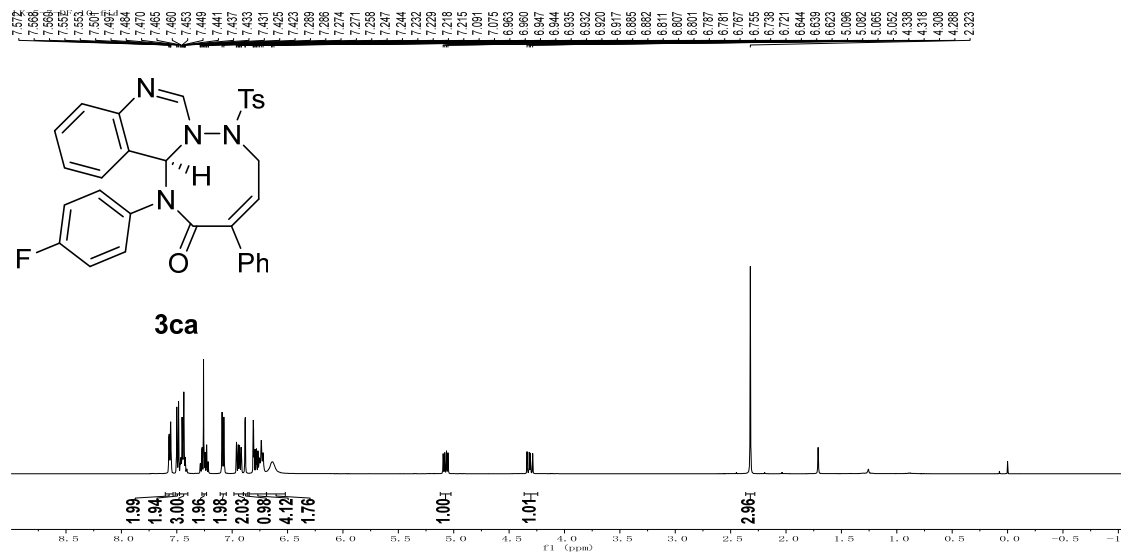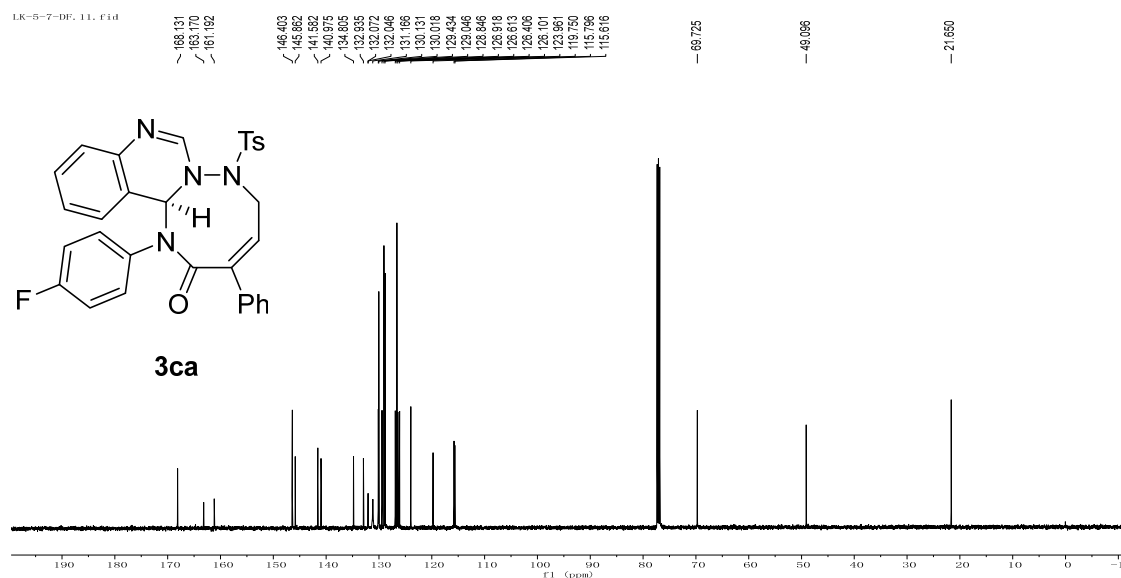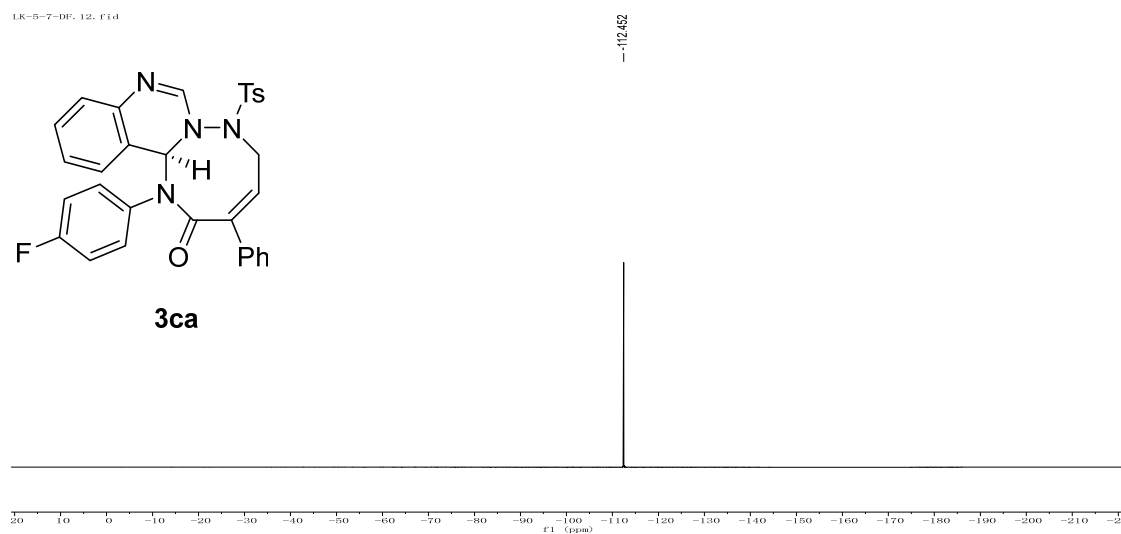

$^1\text{H}$  NMR (500 MHz),  $^{13}\text{C}$  NMR (125 MHz) and  $^{19}\text{F}$  NMR (470 MHz) spectra of **3ca**

LK  
7.564  
7.560  
7.558  
7.556  
7.507  
7.504  
7.498  
7.490  
7.479  
7.467  
7.462  
7.432  
7.309  
7.306  
7.294  
7.291  
7.279  
7.275  
7.272  
7.268  
7.258  
7.255  
7.242  
7.240  
7.120  
7.118  
7.116  
7.102  
7.086  
7.011  
6.995  
6.979  
6.969  
6.966  
6.962  
6.954  
6.951  
6.949  
6.947  
6.933  
6.927  
6.854  
6.825  
6.811  
6.804  
6.791  
6.600  
5.108  
5.094  
5.077  
5.064  
4.344  
4.323  
4.313  
4.293  
2.328

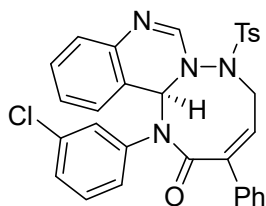

**3da**

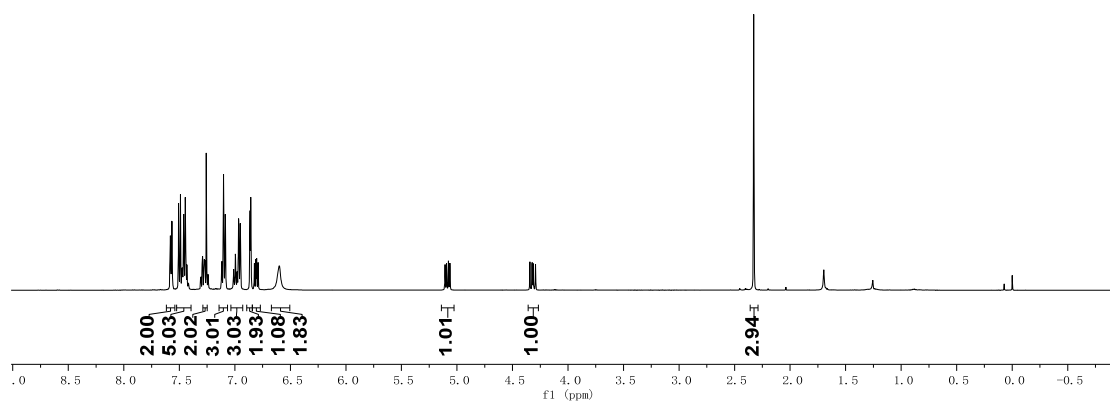

LK-5-16-JCL-2.11.fid

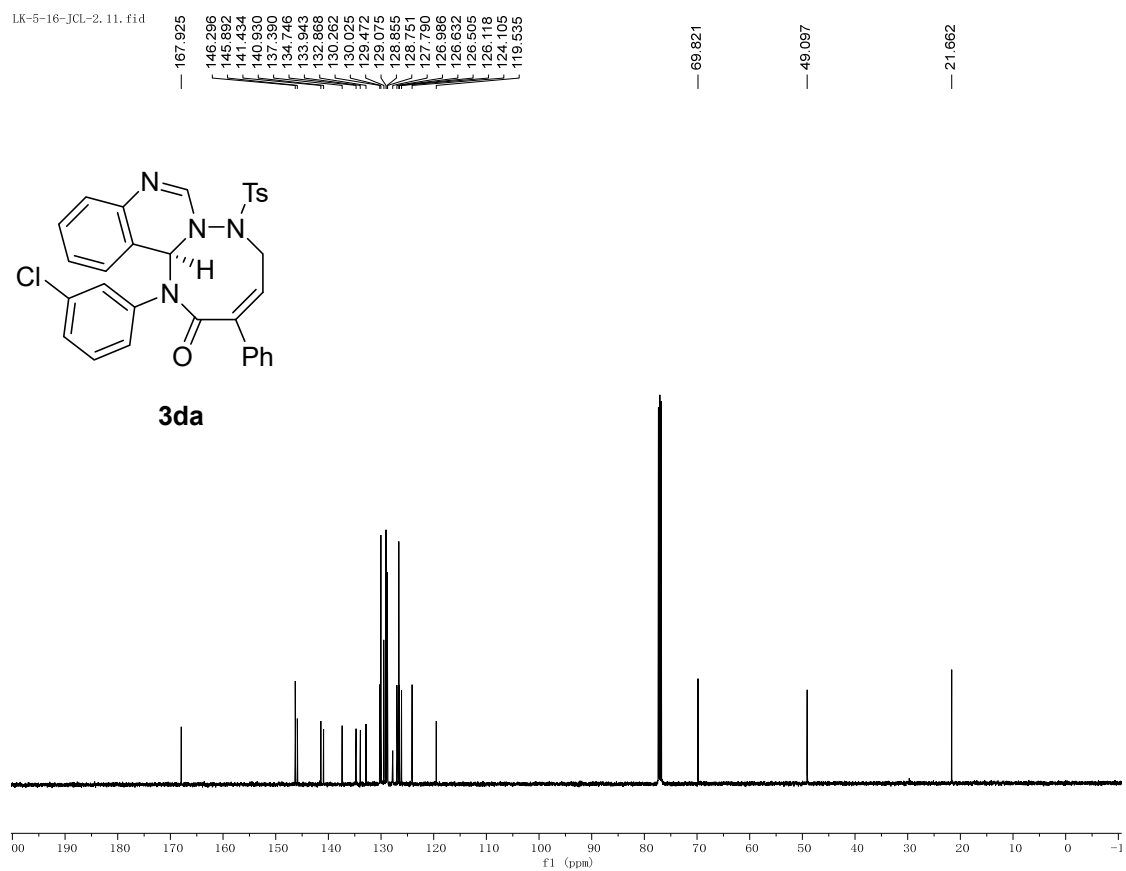

<sup>1</sup>H NMR (500 MHz) and <sup>13</sup>C NMR (125 MHz) spectra of 3da

7.560  
7.556  
7.553  
7.548  
7.544  
7.541  
7.493  
7.490  
7.476  
7.465  
7.460  
7.456  
7.448  
7.445  
7.437  
7.433  
7.430  
7.426  
7.421  
7.419  
7.294  
7.291  
7.279  
7.276  
7.263  
7.258  
7.244  
7.241  
7.230  
7.227  
7.215  
7.212  
7.082  
7.066  
7.024  
7.008  
6.973  
6.971  
6.988  
6.985  
6.929  
6.926  
6.914  
6.911  
6.903  
6.890  
6.886  
6.798  
6.795  
6.784  
6.778  
6.764  
6.605  
6.604  
6.588  
5.082  
5.069  
5.066  
5.052  
5.038  
4.330  
4.300  
4.279  
2.314

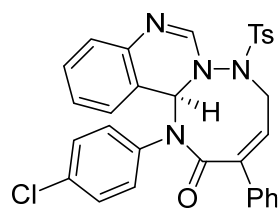

3ea

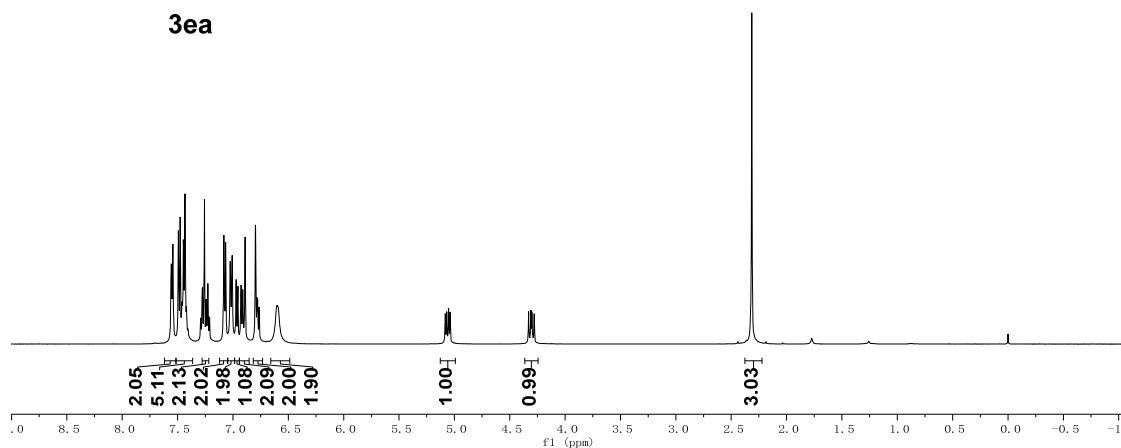

LK-4-DCL.11.fid

168.015  
146.385  
145.884  
141.478  
140.952  
134.792  
134.761  
134.527  
132.906  
130.761  
130.222  
130.035  
129.677  
129.070  
128.929  
128.837  
126.918  
126.598  
126.448  
126.186  
124.033  
119.619  
69.684  
49.098  
21.672

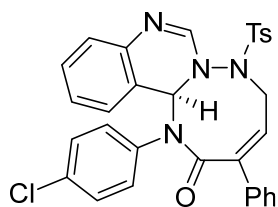

3ea

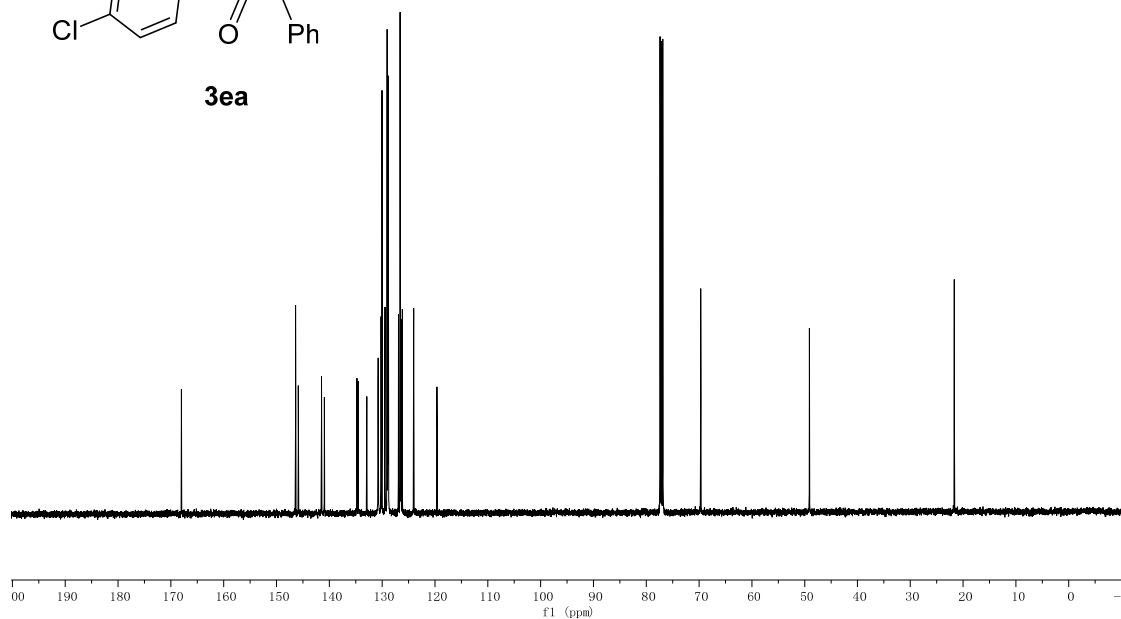

<sup>1</sup>H NMR (500 MHz) and <sup>13</sup>C NMR (125 MHz) spectra of 3ea

7.562  
7.558  
7.555  
7.550  
7.548  
7.543  
7.496  
7.492  
7.483  
7.479  
7.488  
7.485  
7.462  
7.456  
7.451  
7.447  
7.443  
7.440  
7.436  
7.432  
7.430  
7.425  
7.422  
7.299  
7.296  
7.284  
7.281  
7.269  
7.266  
7.258  
7.245  
7.242  
7.230  
7.228  
7.228  
7.215  
7.213  
7.182  
7.185  
7.089  
7.073  
6.979  
6.976  
6.963  
6.950  
6.950  
6.926  
6.913  
6.910  
6.886  
6.883  
6.807  
6.804  
6.800  
6.787  
6.780  
6.766  
6.542  
6.525  
5.088  
5.074  
5.057  
5.044  
4.326  
4.306  
4.296  
4.276  
2.323

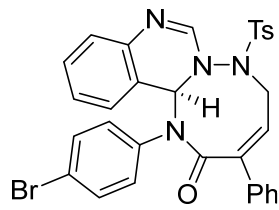

**3fa**

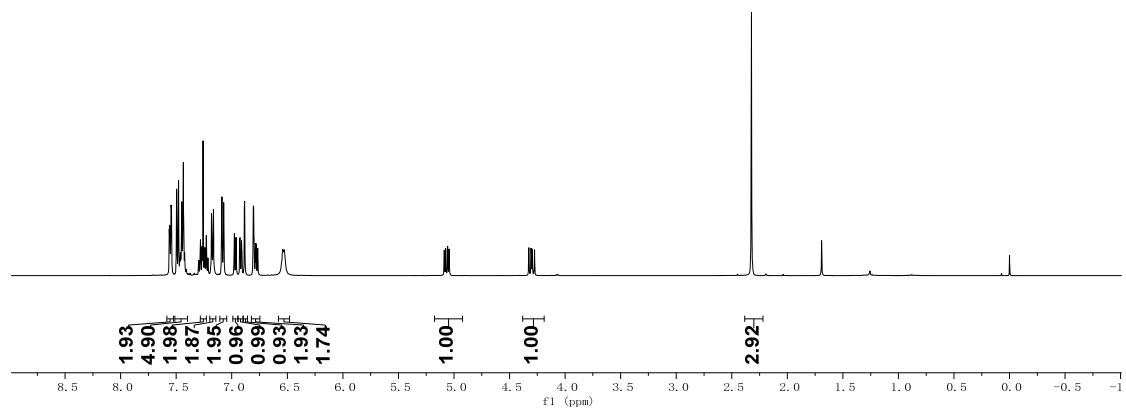

LK-5-8-DBR. 11. fid

167.961  
146.360  
145.877  
141.483  
140.953  
135.344  
134.762  
132.918  
131.894  
131.069  
130.230  
130.026  
129.457  
129.058  
128.841  
126.911  
126.601  
126.438  
124.208  
124.042  
122.733  
119.606

69.656  
49.102  
21.663

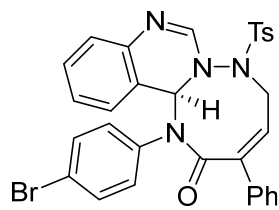

**3fa**

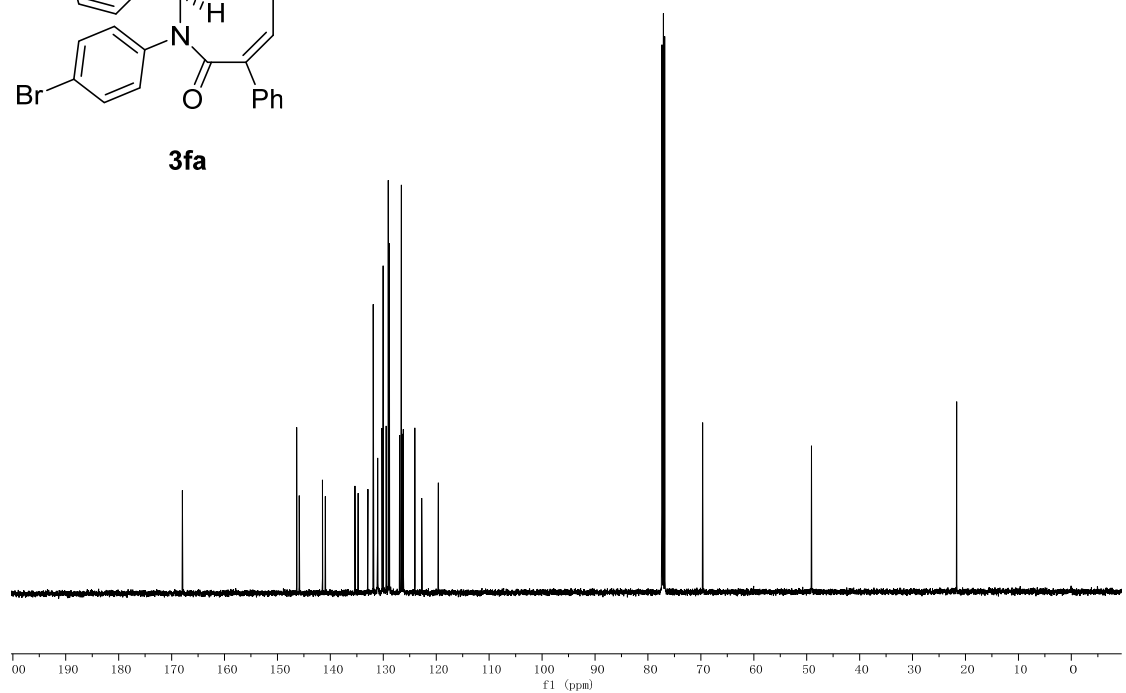

<sup>1</sup>H NMR (500 MHz) and <sup>13</sup>C NMR (125 MHz) spectra of **3fa**

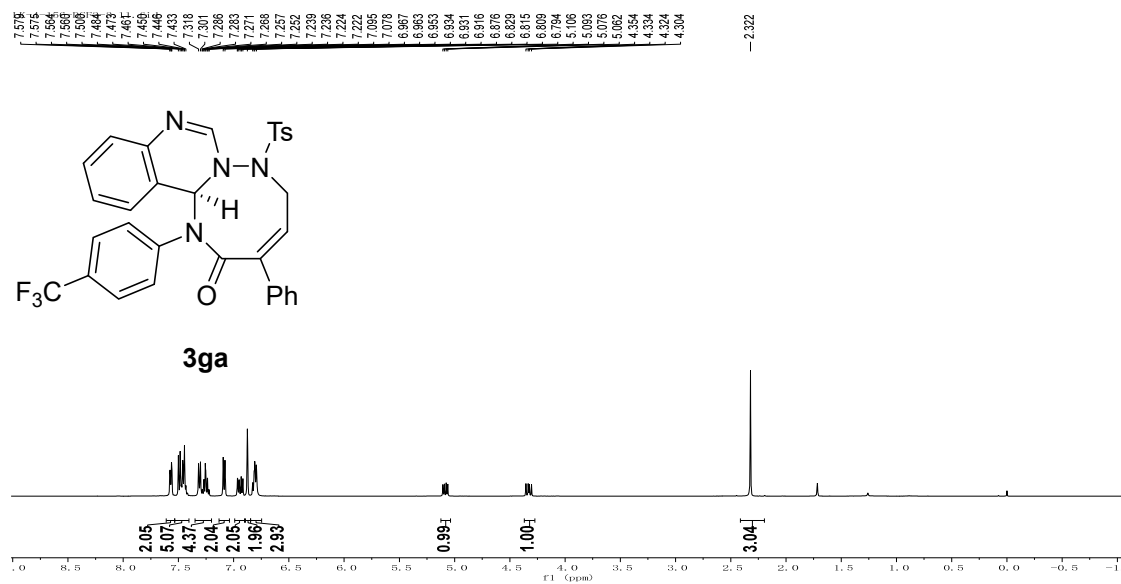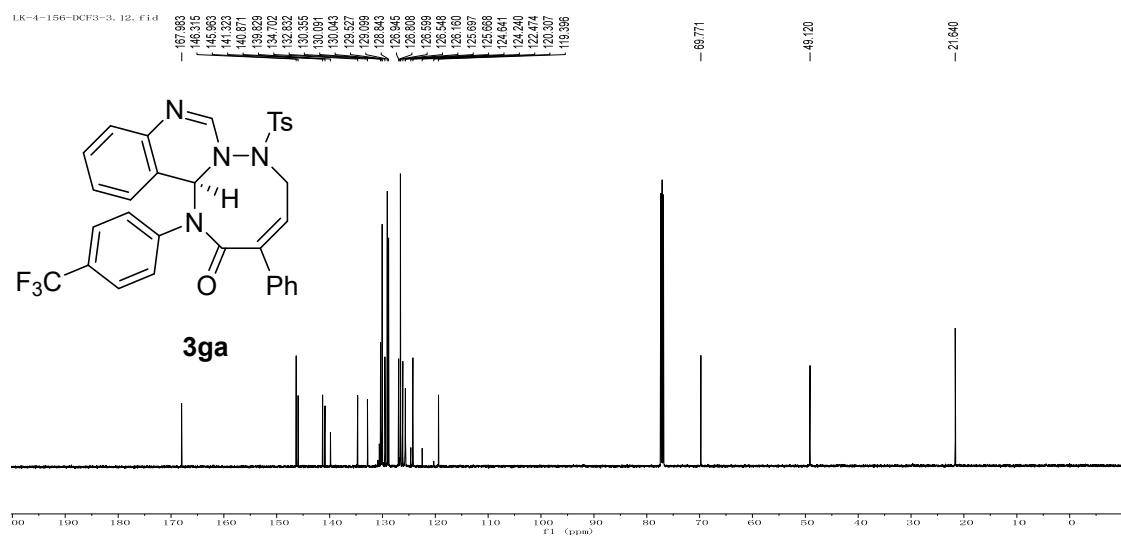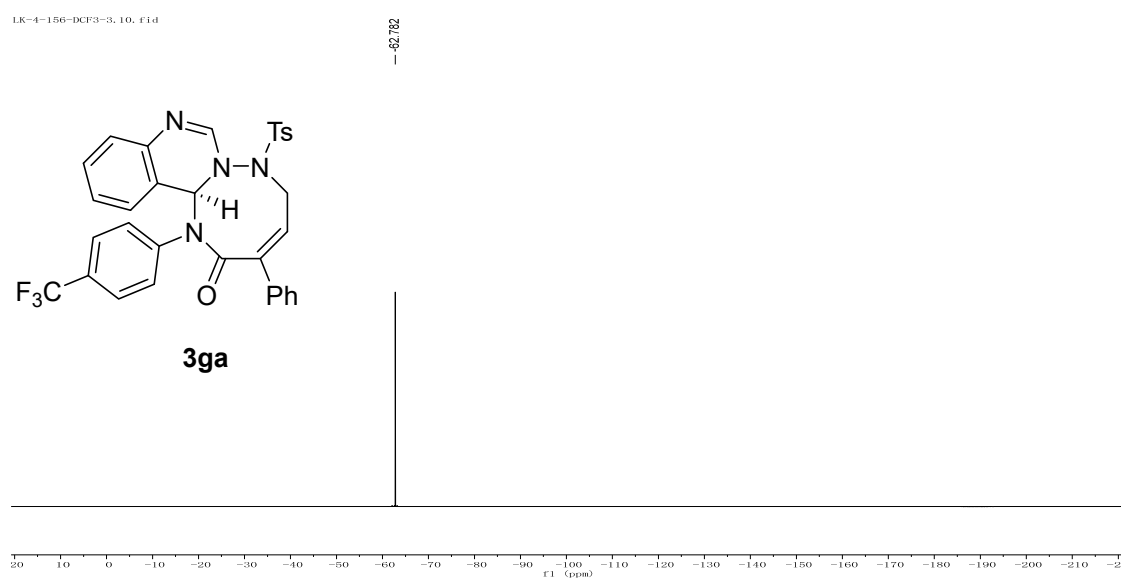

<sup>1</sup>H NMR (500 MHz), <sup>13</sup>C NMR (125 MHz) and <sup>19</sup>F NMR (470 MHz) spectra of **3ga**

LK  
 7.569  
 7.568  
 7.566  
 7.565  
 7.577  
 7.506  
 7.489  
 7.470  
 7.465  
 7.461  
 7.453  
 7.448  
 7.438  
 7.433  
 7.430  
 7.426  
 7.421  
 7.412  
 7.406  
 7.269  
 7.266  
 7.258  
 7.252  
 7.240  
 7.236  
 7.225  
 7.222  
 7.217  
 7.094  
 7.084  
 6.945  
 6.940  
 6.929  
 6.925  
 6.914  
 6.910  
 6.873  
 6.870  
 6.797  
 6.792  
 6.784  
 6.777  
 6.764  
 6.476  
 6.405  
 5.104  
 5.091  
 5.074  
 5.061  
 4.411  
 4.380  
 4.360  
 2.318  
 2.062

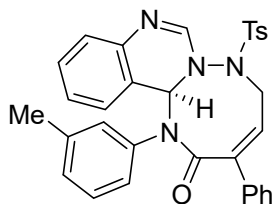

3ha

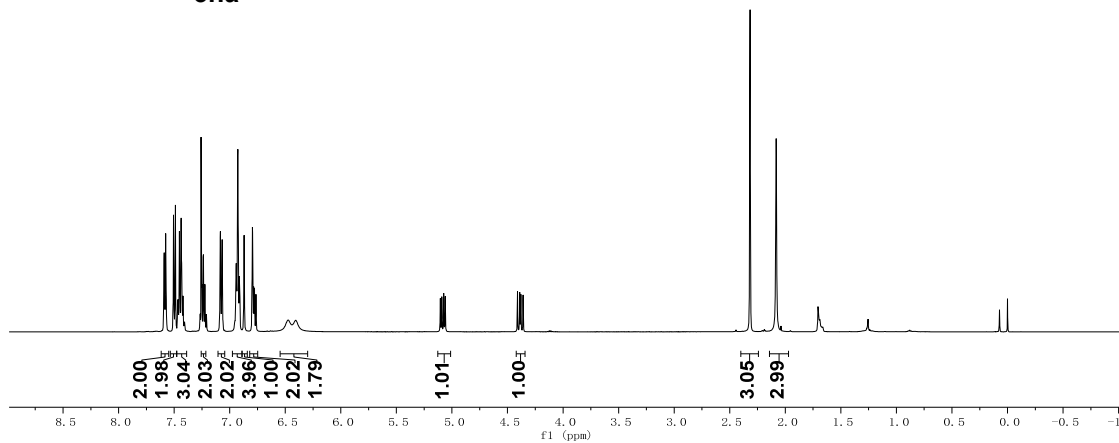

LK-5-11-JME. 11. f1d

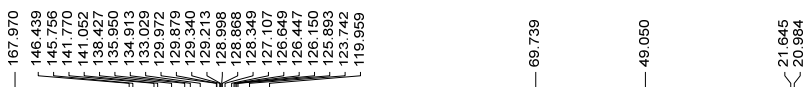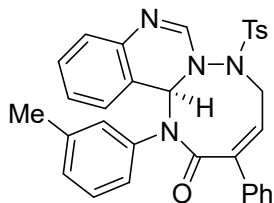

3ha

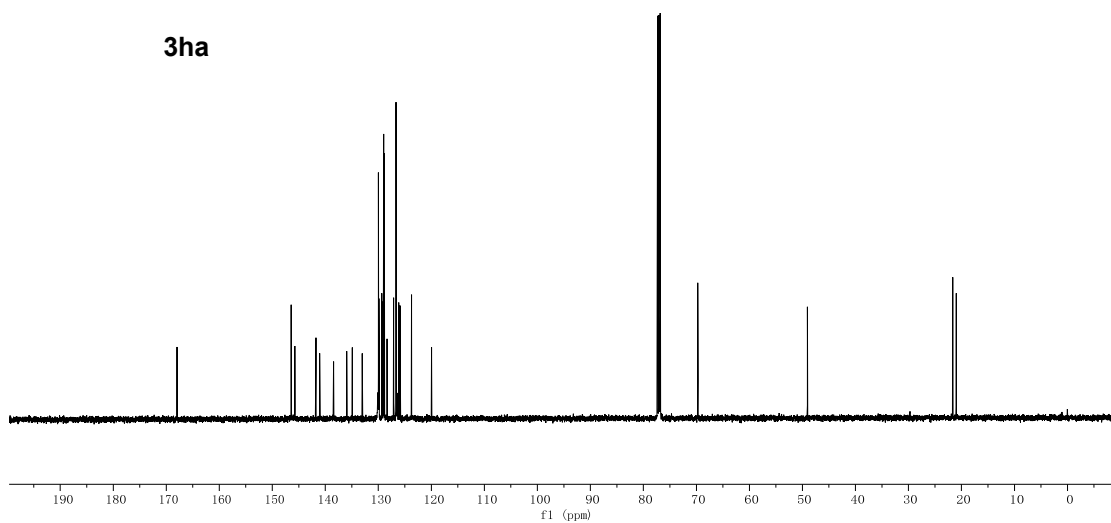

$^1\text{H}$  NMR (500 MHz) and  $^{13}\text{C}$  NMR (125 MHz) spectra of 3ha



7.569, 7.565, 7.557, 7.552, 7.550, 7.544, 7.496, 7.486, 7.489, 7.484, 7.449, 7.441, 7.427, 7.424, 7.417, 7.411, 7.400, 7.396, 7.374, 7.270, 7.259, 7.256, 7.243, 7.240, 7.233, 7.230, 7.218, 7.215, 7.203, 7.200, 7.068, 7.052, 6.946, 6.943, 6.930, 6.927, 6.914, 6.911, 6.899, 6.895, 6.884, 6.838, 6.775, 6.761, 6.741, 6.730, 6.727, 6.528, 5.093, 5.079, 5.062, 5.049, 4.394, 4.374, 4.364, 4.343, 2.309, 2.173

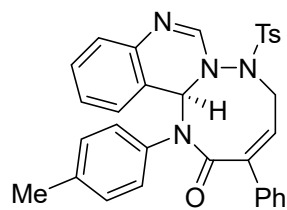

**3ia**

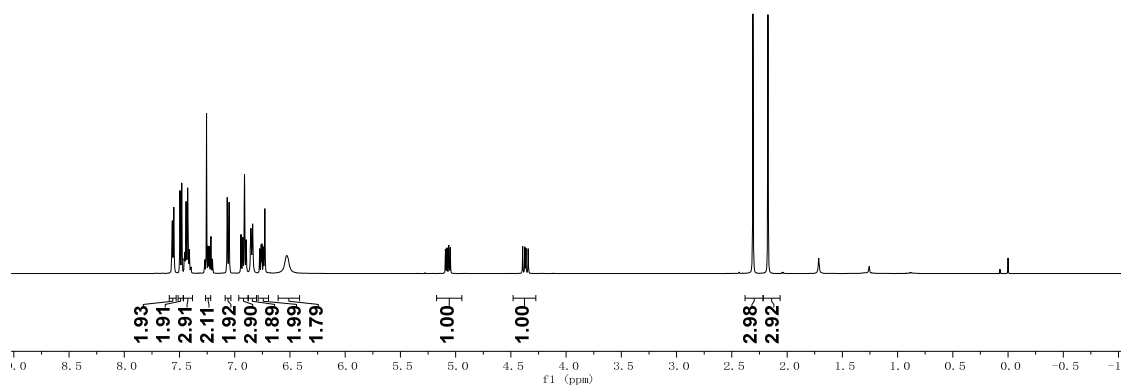

LK-5-9-DME. 11. fid

168.051, 146.525, 145.712, 141.823, 141.065, 138.329, 134.903, 133.348, 133.101, 129.961, 129.886, 129.372, 129.322, 129.087, 128.981, 128.860, 126.990, 126.614, 125.672, 123.860, 120.046

69.640

49.043

21.628, 21.105

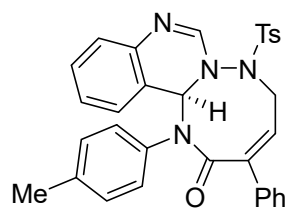

**3ia**

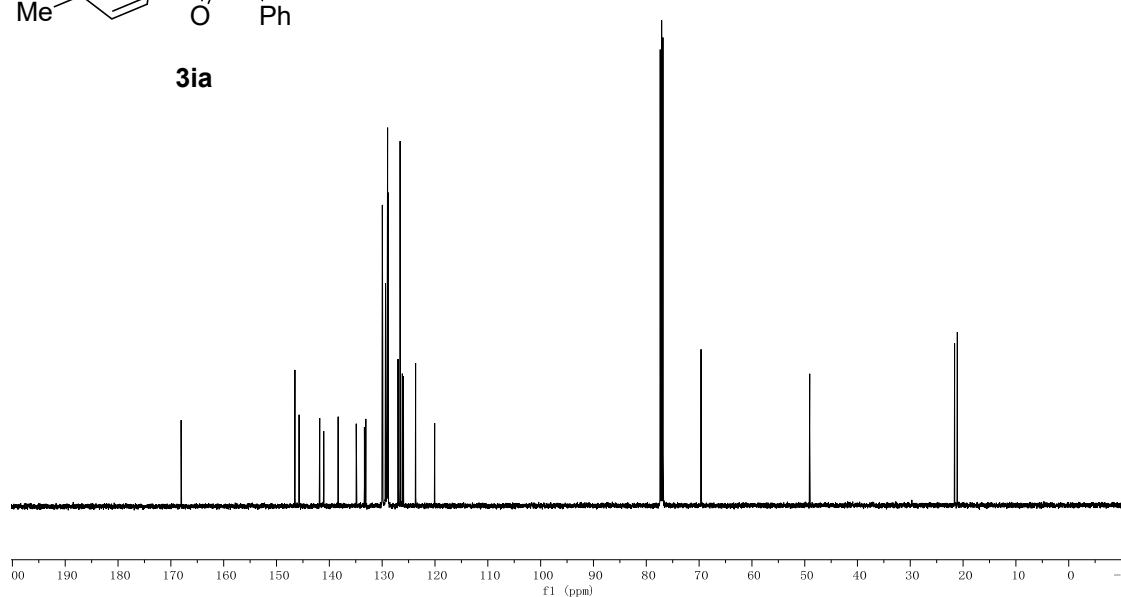

$^1\text{H}$  NMR (500 MHz) and  $^{13}\text{C}$  NMR (125 MHz) spectra of **3ia**

LK-5-19-3a  
 7.585  
 7.574  
 7.504  
 7.485  
 7.465  
 7.450  
 7.445  
 7.438  
 7.428  
 7.419  
 7.414  
 7.405  
 7.400  
 7.394  
 7.382  
 7.265  
 7.262  
 7.255  
 7.250  
 7.247  
 7.235  
 7.230  
 7.219  
 7.215  
 7.204  
 7.201  
 7.072  
 7.056  
 6.935  
 6.920  
 6.917  
 6.863  
 6.860  
 6.784  
 6.775  
 6.771  
 6.763  
 6.750  
 6.725  
 6.707  
 6.695  
 5.082  
 5.069  
 5.059  
 4.413  
 4.383  
 4.362  
 2.302  
 2.037

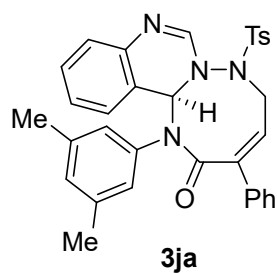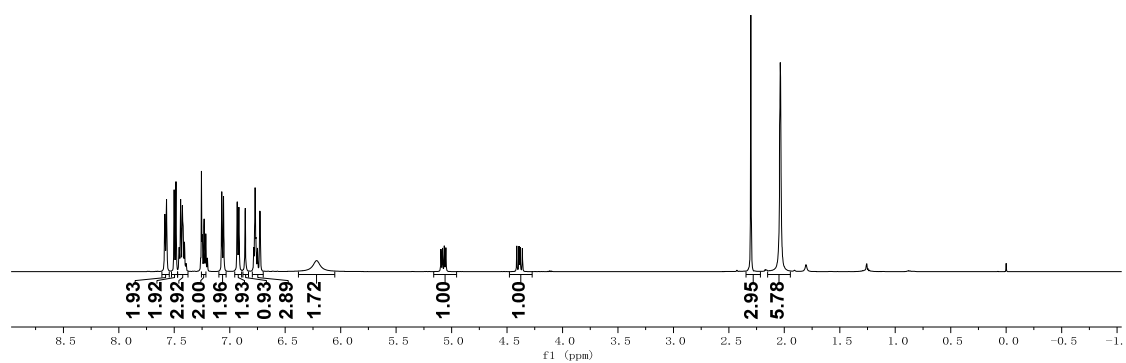

LK-5-19-3. 5-2ME-1. 11. f1.f1

167.921  
 146.404  
 145.729  
 141.834  
 141.107  
 138.055  
 135.712  
 134.949  
 133.066  
 130.113  
 129.960  
 129.803  
 129.309  
 128.981  
 128.869  
 127.143  
 126.650  
 126.051  
 125.849  
 123.670  
 120.029

69.765

49.021

21.629  
 20.907

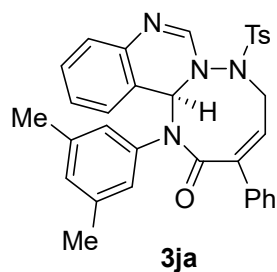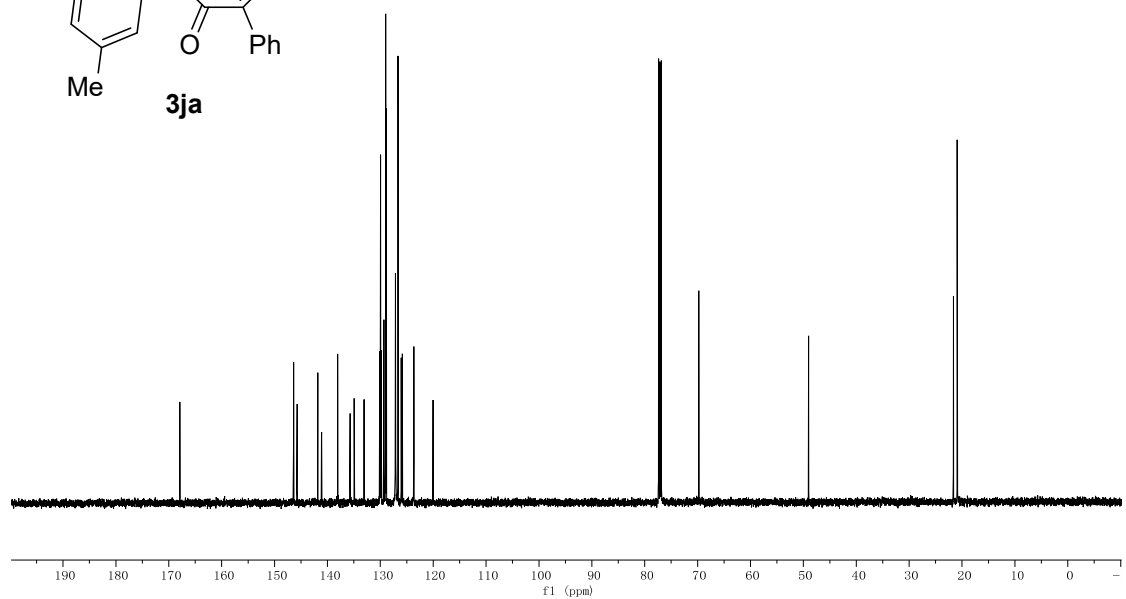

$^1\text{H}$  NMR (500 MHz) and  $^{13}\text{C}$  NMR (125 MHz) spectra of **3ja**

7.589  
7.577  
7.573  
7.504  
7.488  
7.470  
7.465  
7.452  
7.438  
7.435  
7.432  
7.427  
7.421  
7.397  
7.381  
7.376  
7.366  
7.258  
7.250  
7.245  
7.234  
7.231  
7.219  
7.216  
7.085  
7.069  
7.004  
6.988  
6.972  
6.963  
6.960  
6.951  
6.947  
6.935  
6.932  
6.872  
6.819  
6.816  
6.798  
6.784  
6.778  
6.764  
6.699  
6.690  
6.664  
6.664  
6.352  
6.072  
5.094  
5.081  
5.064  
5.050  
4.390  
4.370  
4.360  
4.340  
3.515  
2.317

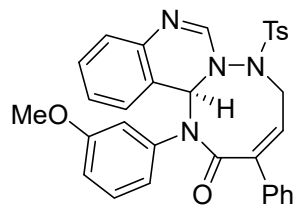

**3ka**

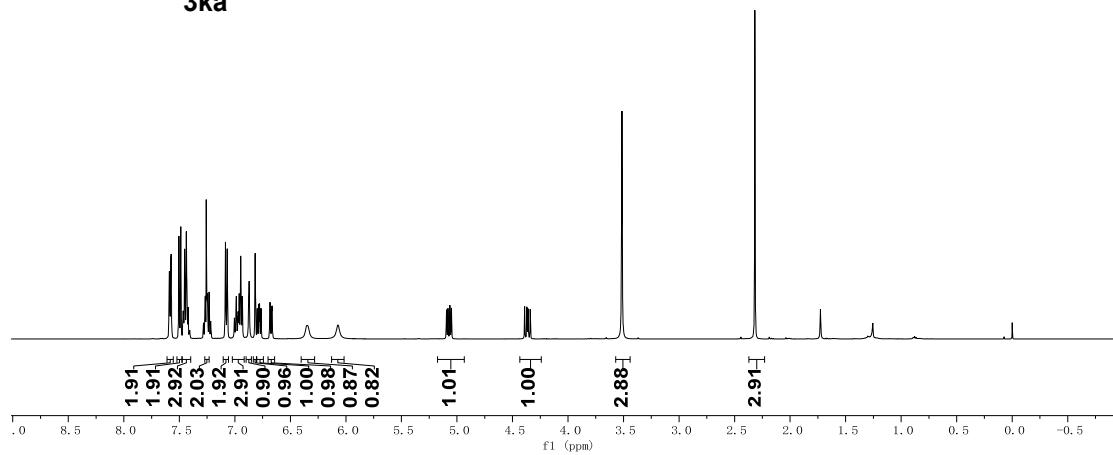

LK-5-20-JOME.11.fid

167.911  
159.395  
146.525  
145.784  
141.662  
141.148  
137.114  
134.851  
133.001  
129.988  
129.386  
129.353  
129.271  
128.992  
127.093  
126.653  
126.168  
126.051  
123.889  
121.753  
119.934  
115.189  
114.600  
69.760  
55.166  
49.012  
21.648

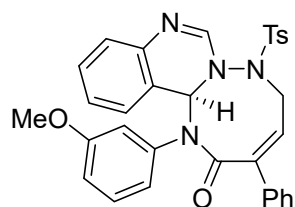

**3ka**

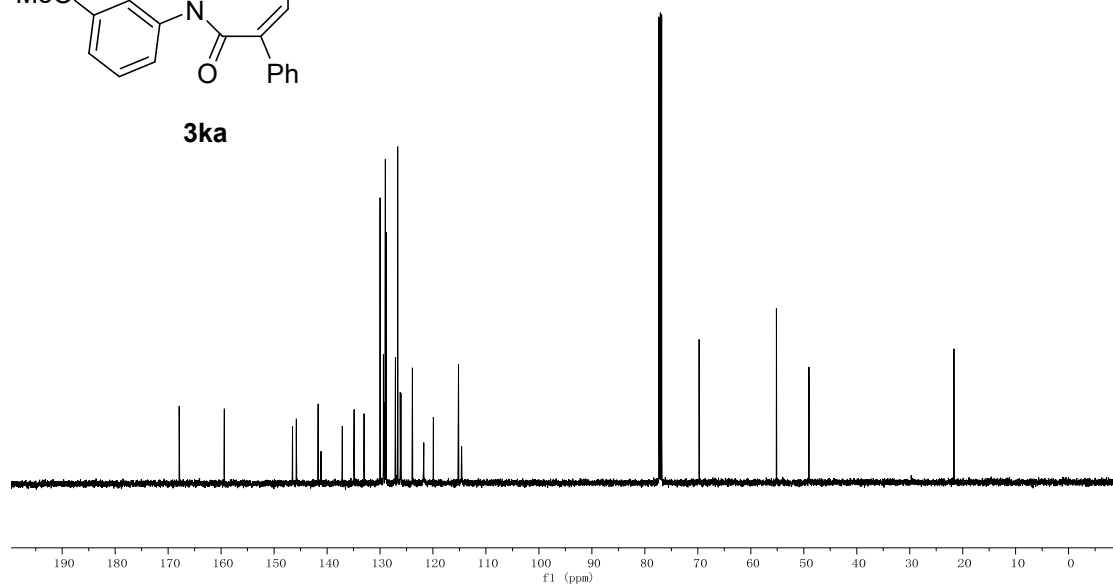

<sup>1</sup>H NMR (500 MHz) and <sup>13</sup>C NMR (125 MHz) spectra of 3ka

LK-4-155-08  
 7.568  
 7.567  
 7.554  
 7.553  
 7.548  
 7.495  
 7.482  
 7.469  
 7.454  
 7.442  
 7.427  
 7.412  
 7.275  
 7.272  
 7.259  
 7.245  
 7.242  
 7.235  
 7.232  
 7.220  
 7.217  
 7.205  
 7.202  
 7.072  
 7.055  
 6.960  
 6.957  
 6.845  
 6.842  
 6.811  
 6.807  
 6.885  
 6.881  
 6.772  
 6.758  
 6.752  
 6.738  
 6.733  
 6.729  
 6.726  
 6.560  
 5.089  
 5.075  
 5.059  
 5.045  
 4.367  
 4.337  
 4.316  
 3.649  
 2.310

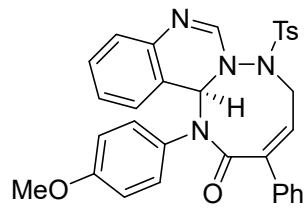

**3la**

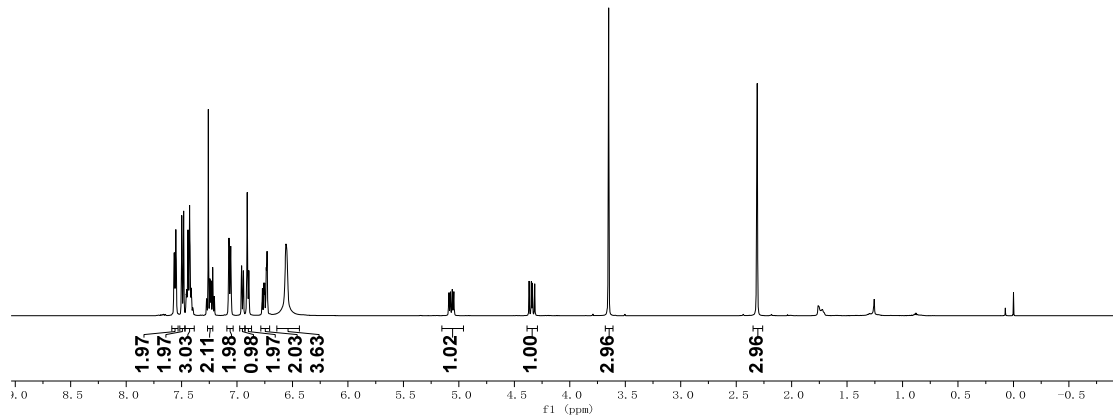

LK-4-155-DOME. 11. f1d

168.213  
 159.234  
 146.485  
 145.742  
 141.848  
 141.042  
 134.902  
 133.062  
 130.973  
 129.973  
 129.932  
 128.987  
 128.855  
 128.495  
 126.920  
 126.617  
 126.028  
 123.651  
 120.043  
 113.974  
 69.696  
 55.219  
 49.063  
 21.636

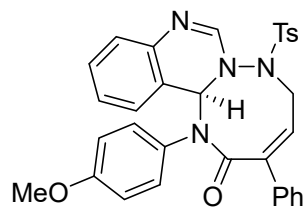

**3la**

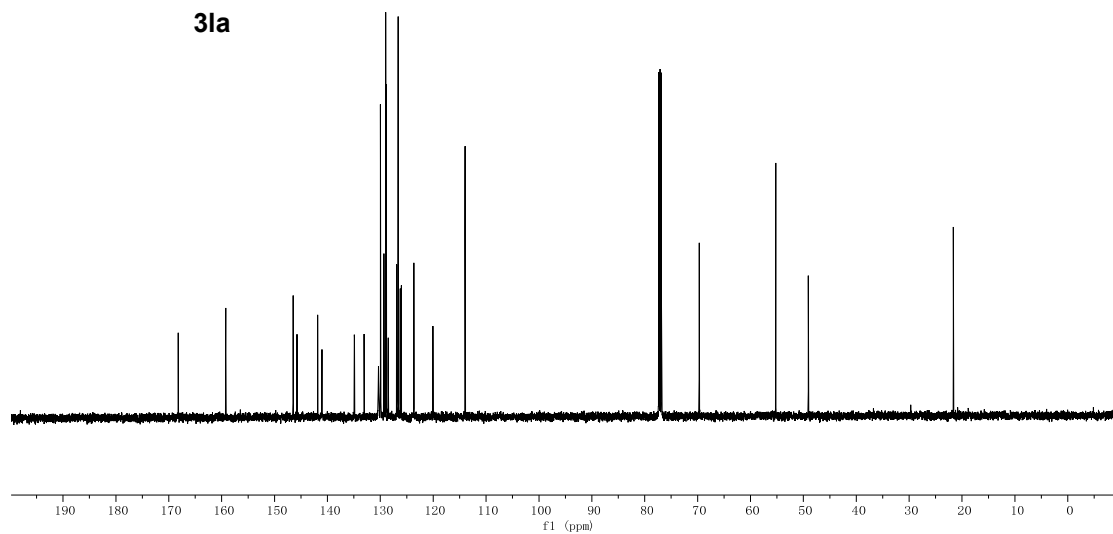

<sup>1</sup>H NMR (500 MHz) and <sup>13</sup>C NMR (125 MHz) spectra of **3la**

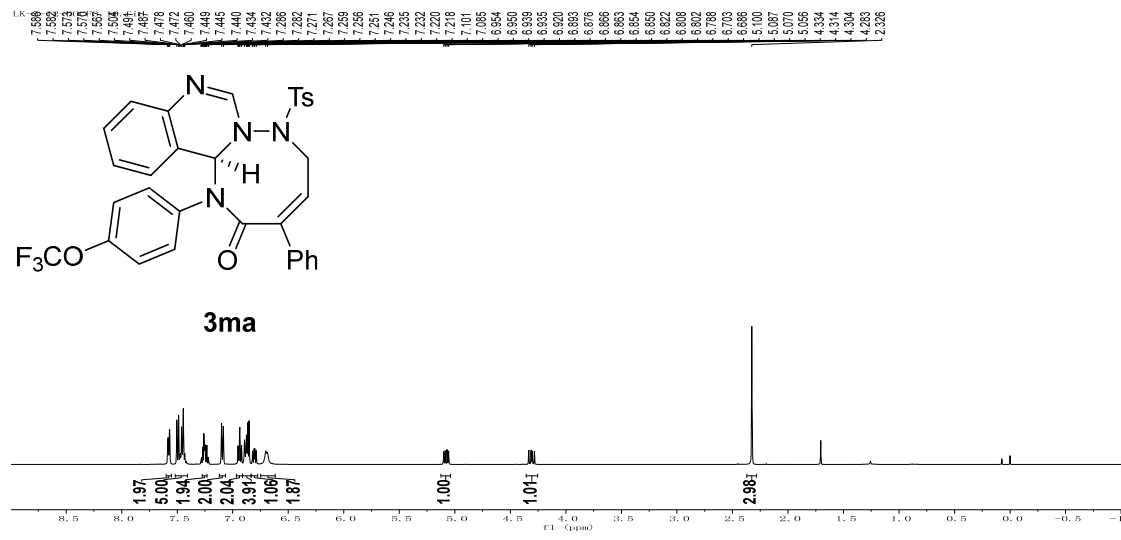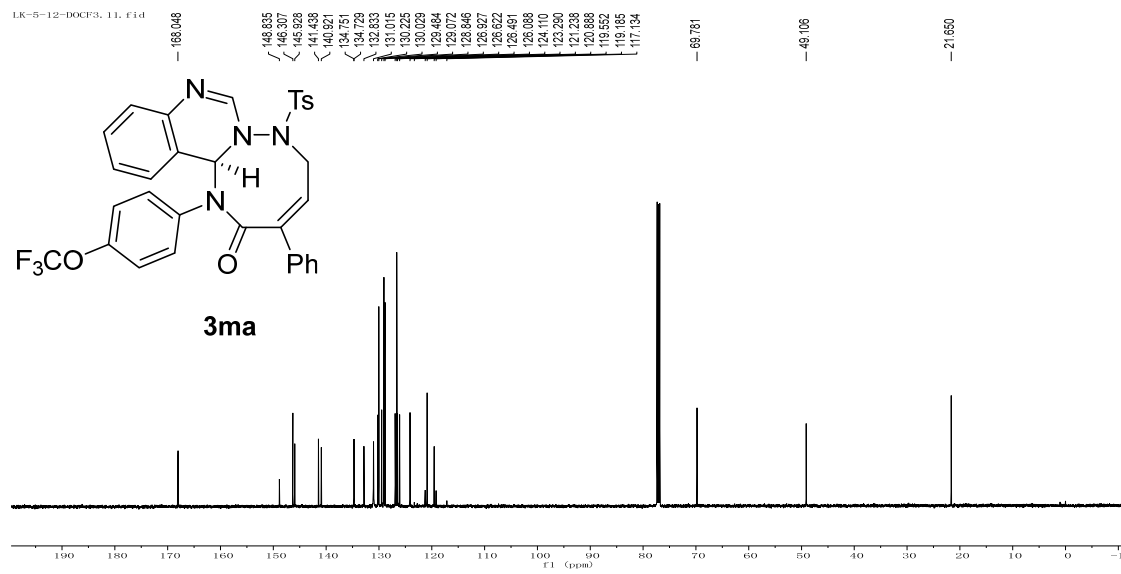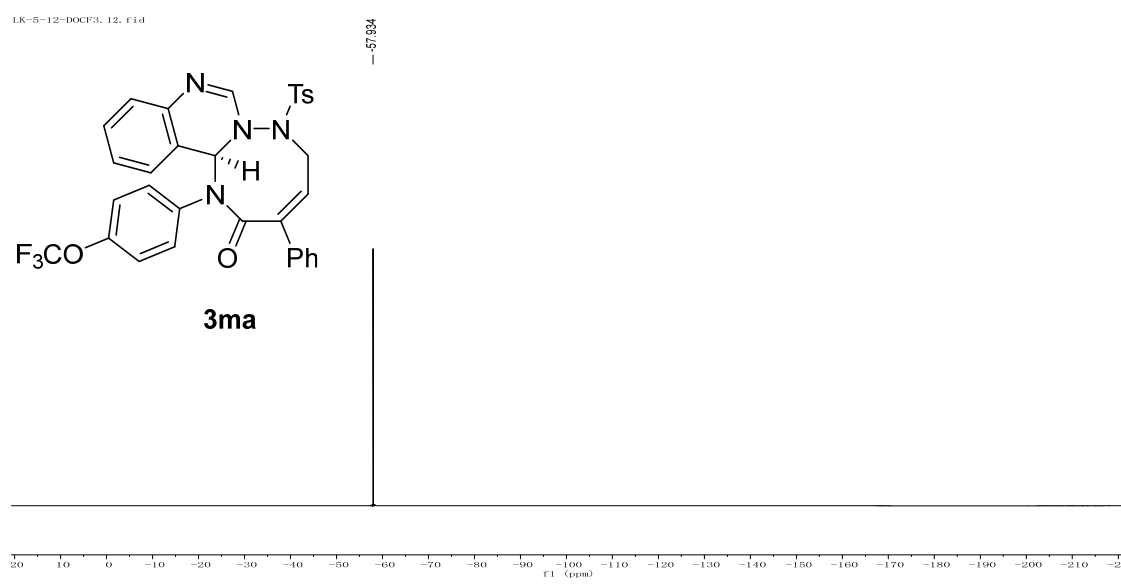

<sup>1</sup>H NMR (500 MHz), <sup>13</sup>C NMR (125 MHz) and <sup>19</sup>F NMR (470 MHz) spectra of **3ma**

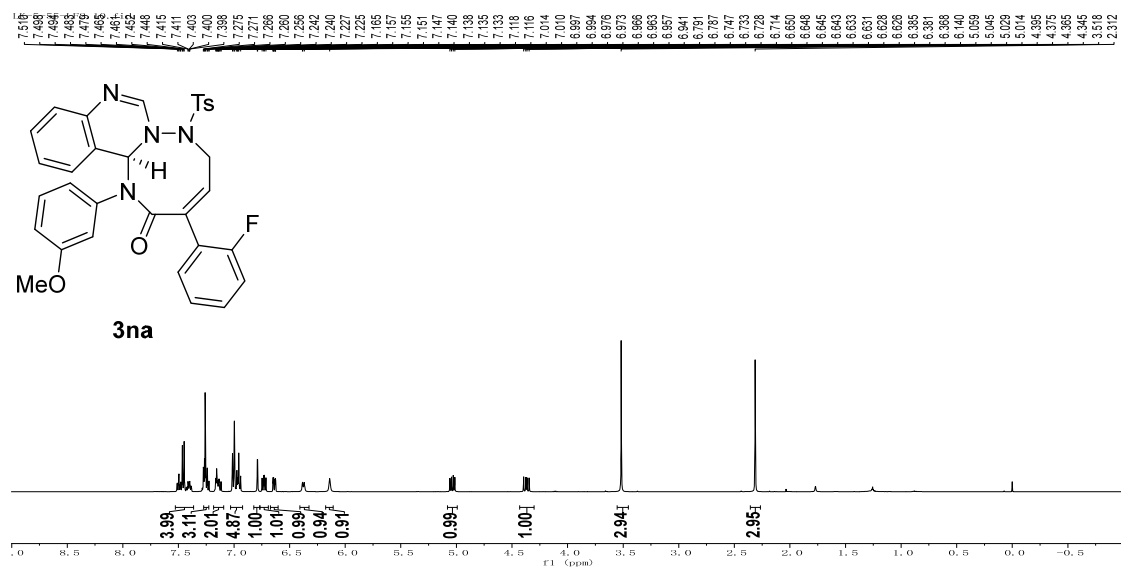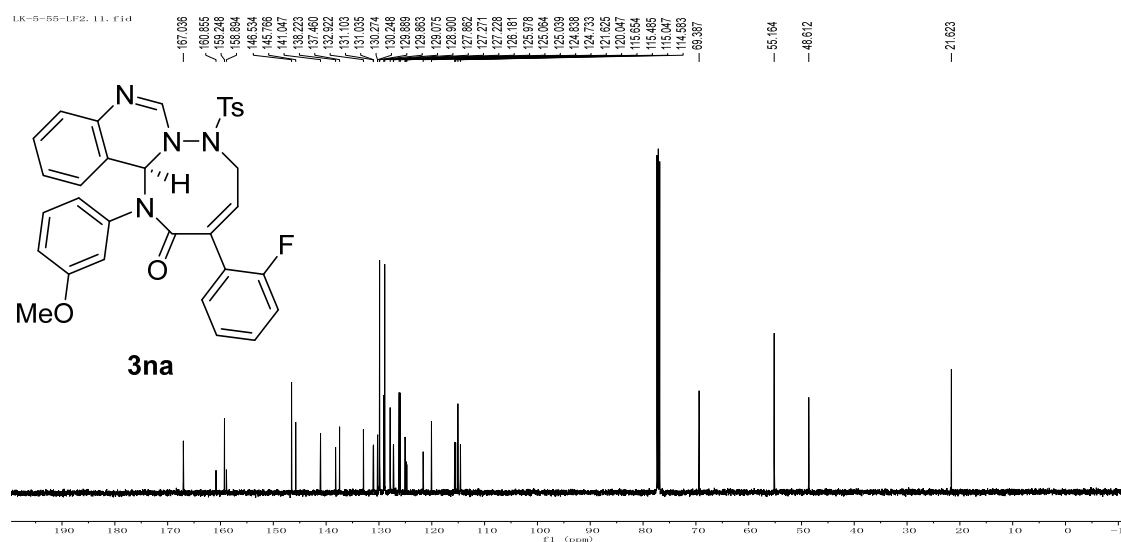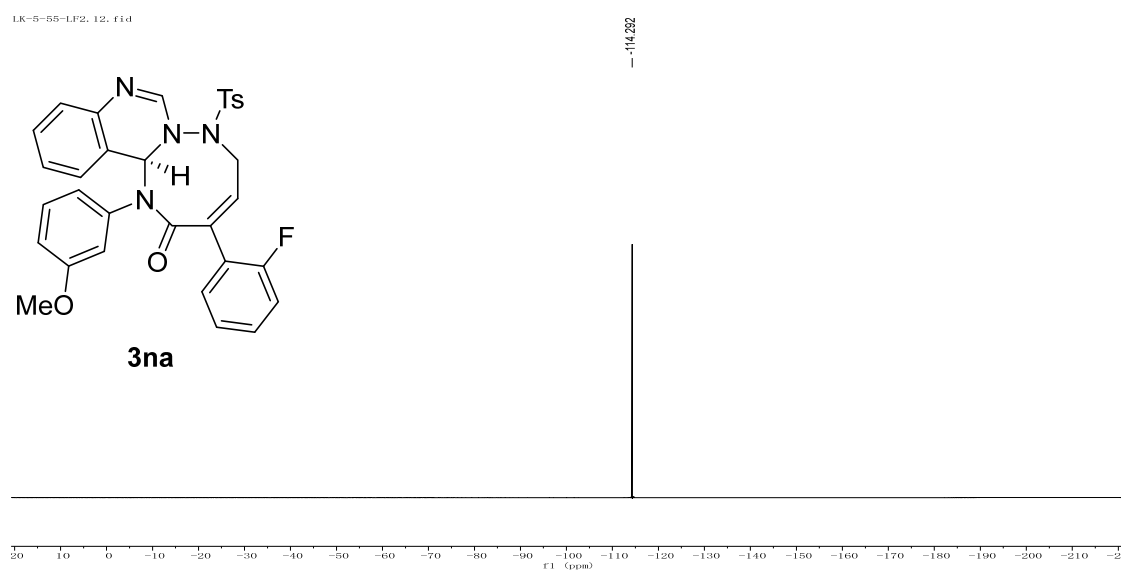

$^1\text{H}$  NMR (500 MHz),  $^{13}\text{C}$  NMR (125 MHz) and  $^{19}\text{F}$  NMR (470 MHz) spectra of **3na**

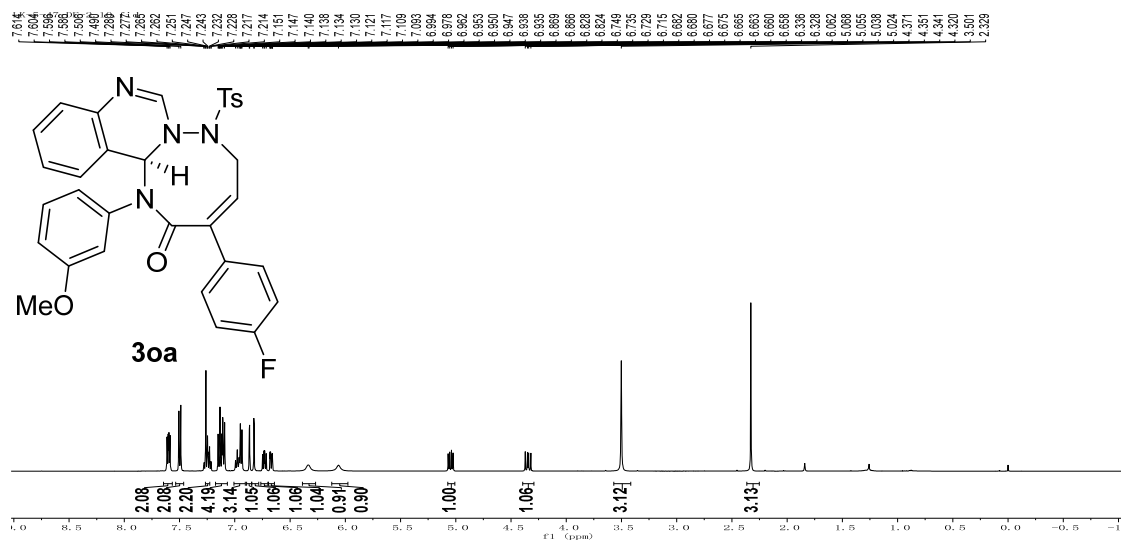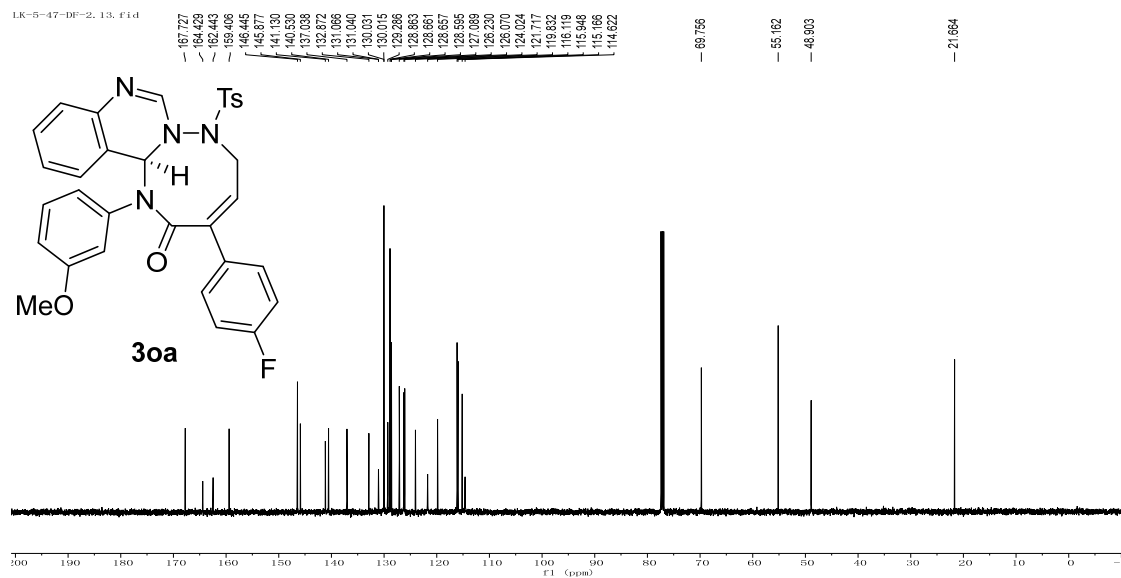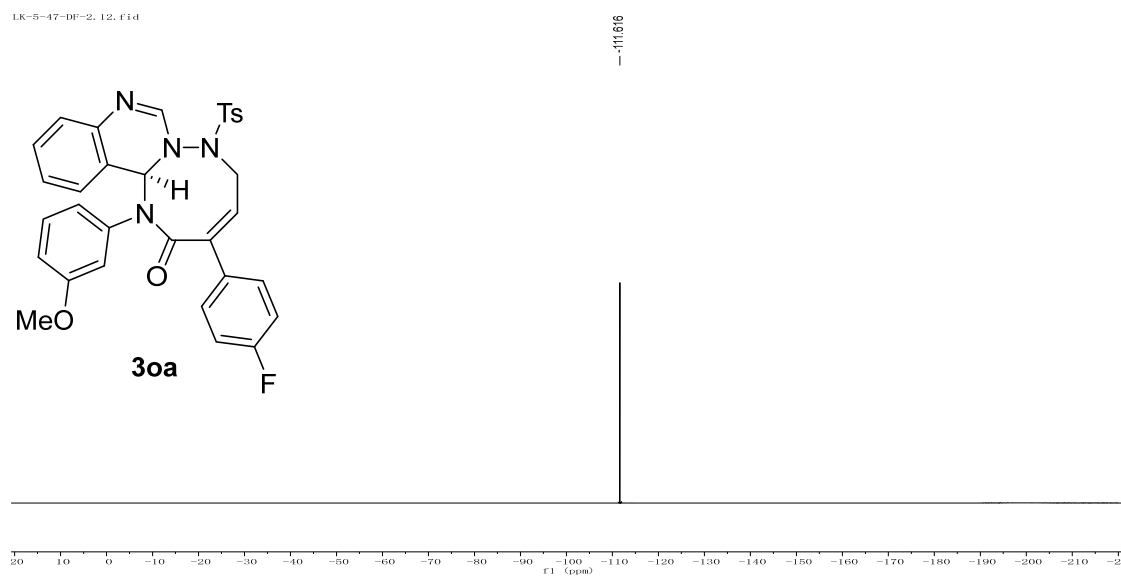

$^1\text{H}$  NMR (500 MHz),  $^{13}\text{C}$  NMR (125 MHz) and  $^{19}\text{F}$  NMR (470 MHz) spectra of **30a**

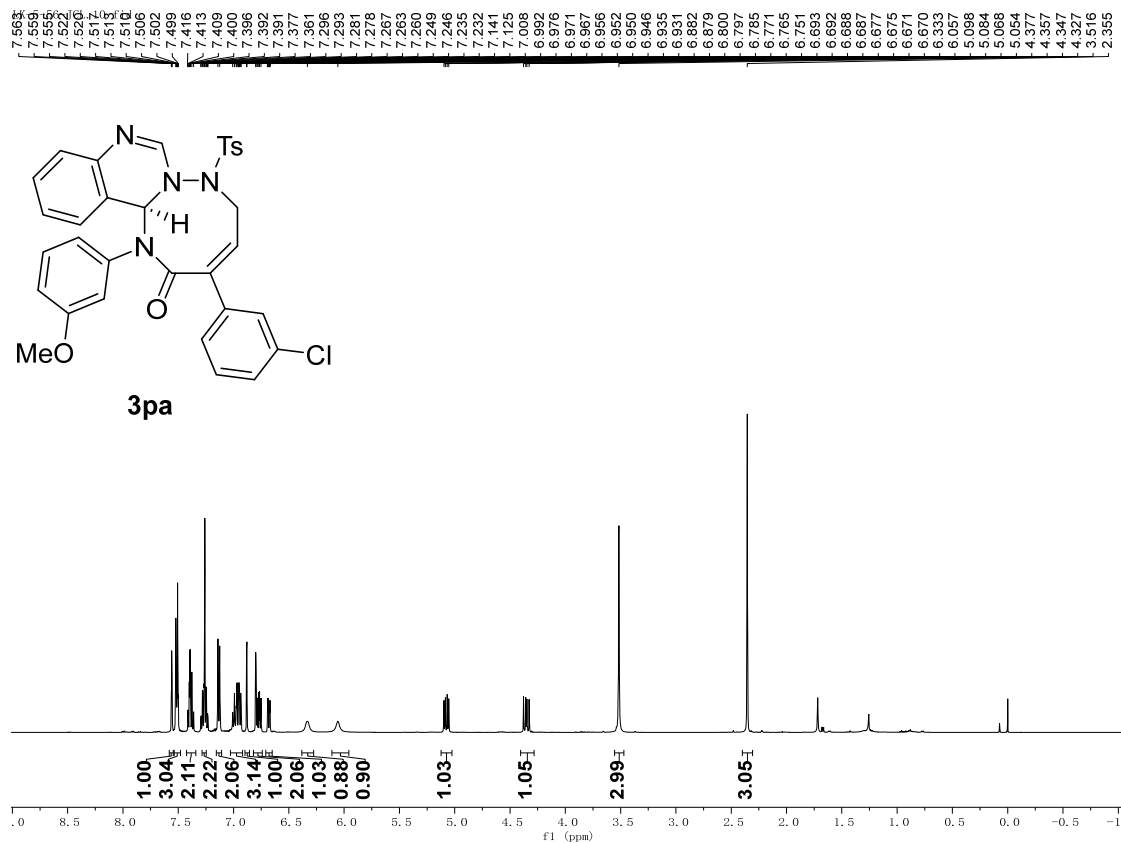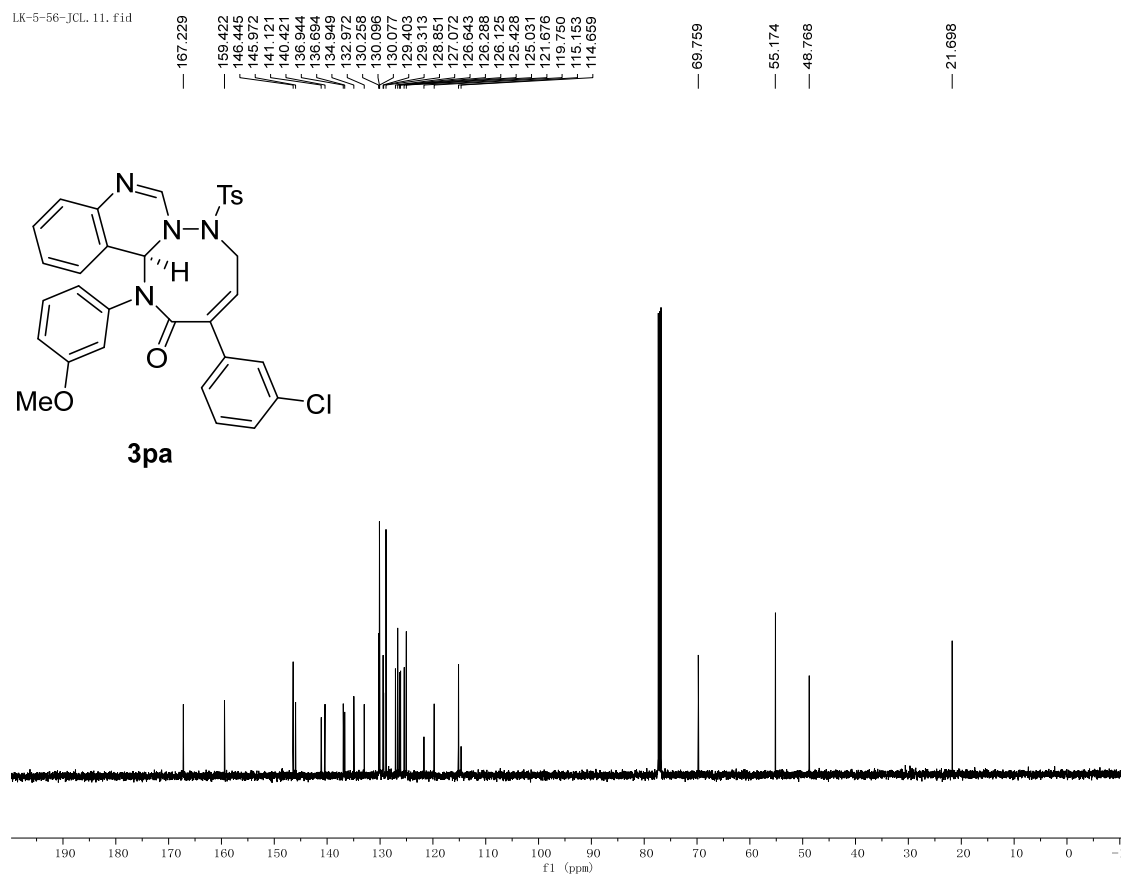

<sup>1</sup>H NMR (500 MHz) and <sup>13</sup>C NMR (125 MHz) spectra of **3pa**



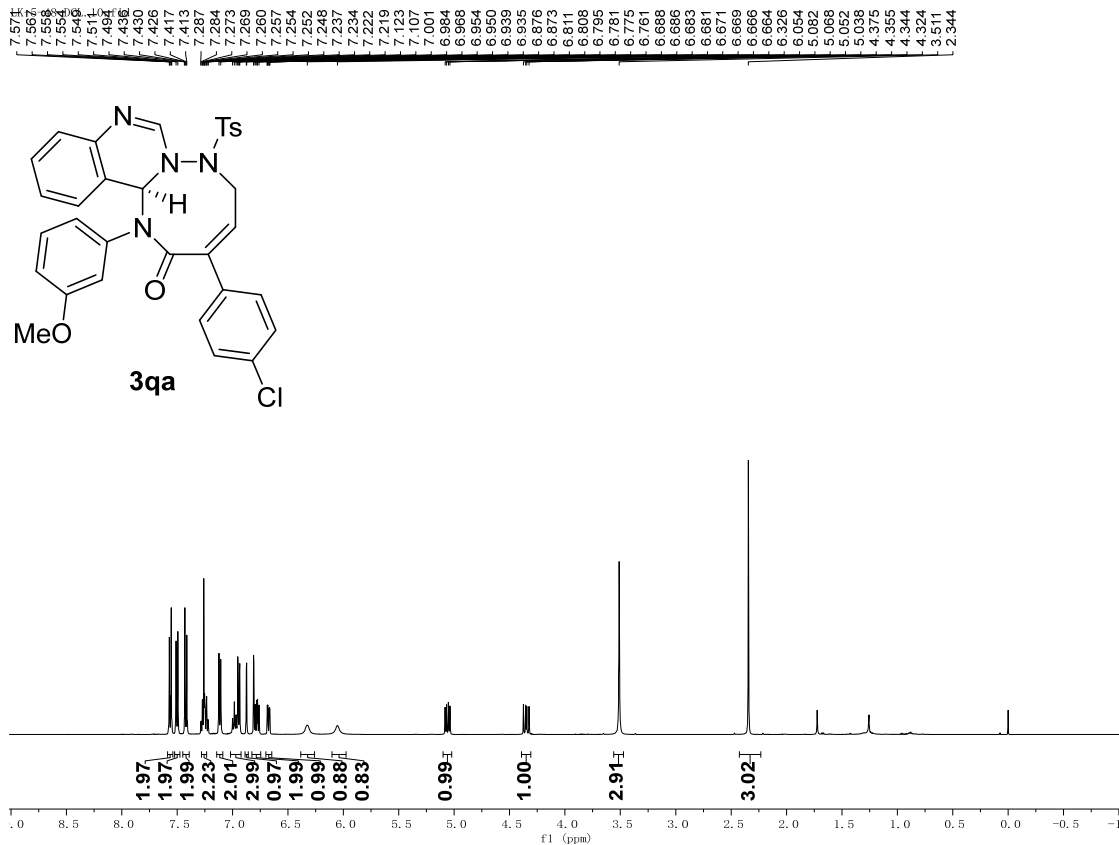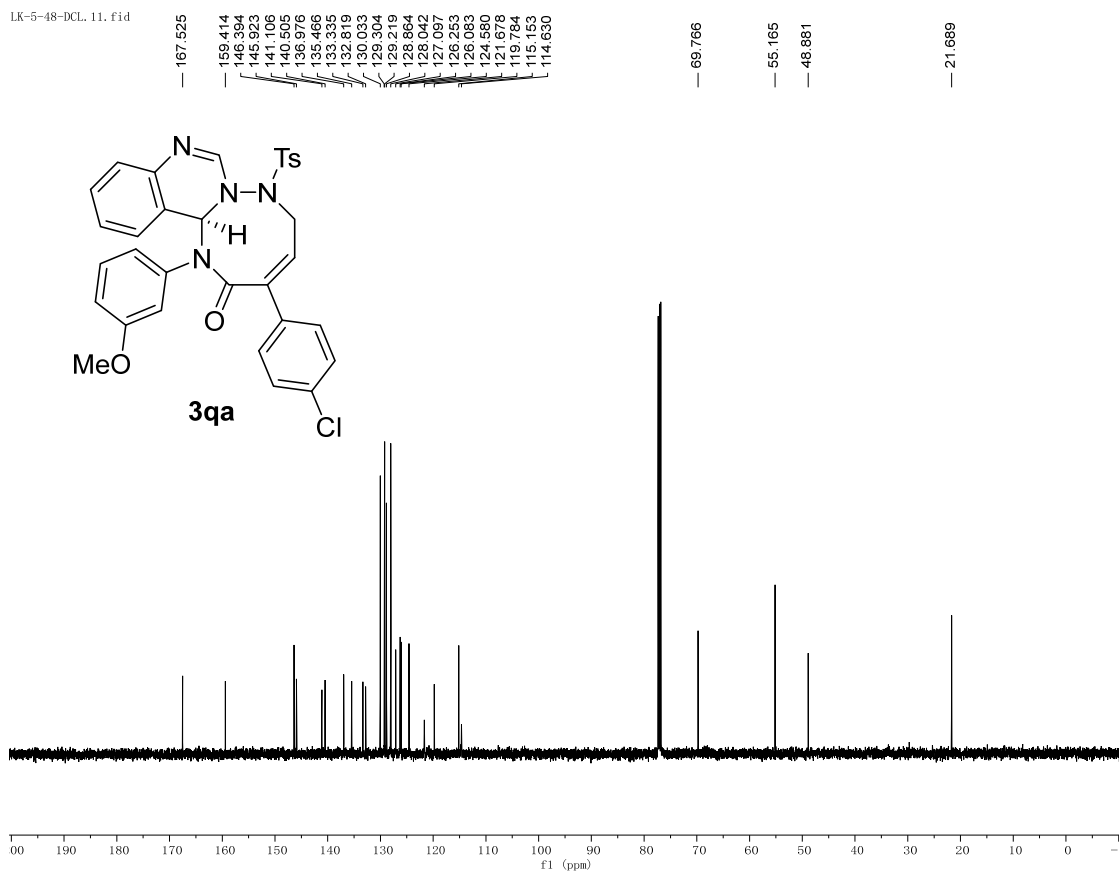

$^1\text{H}$  NMR (500 MHz) and  $^{13}\text{C}$  NMR (125 MHz) spectra of **3qa**

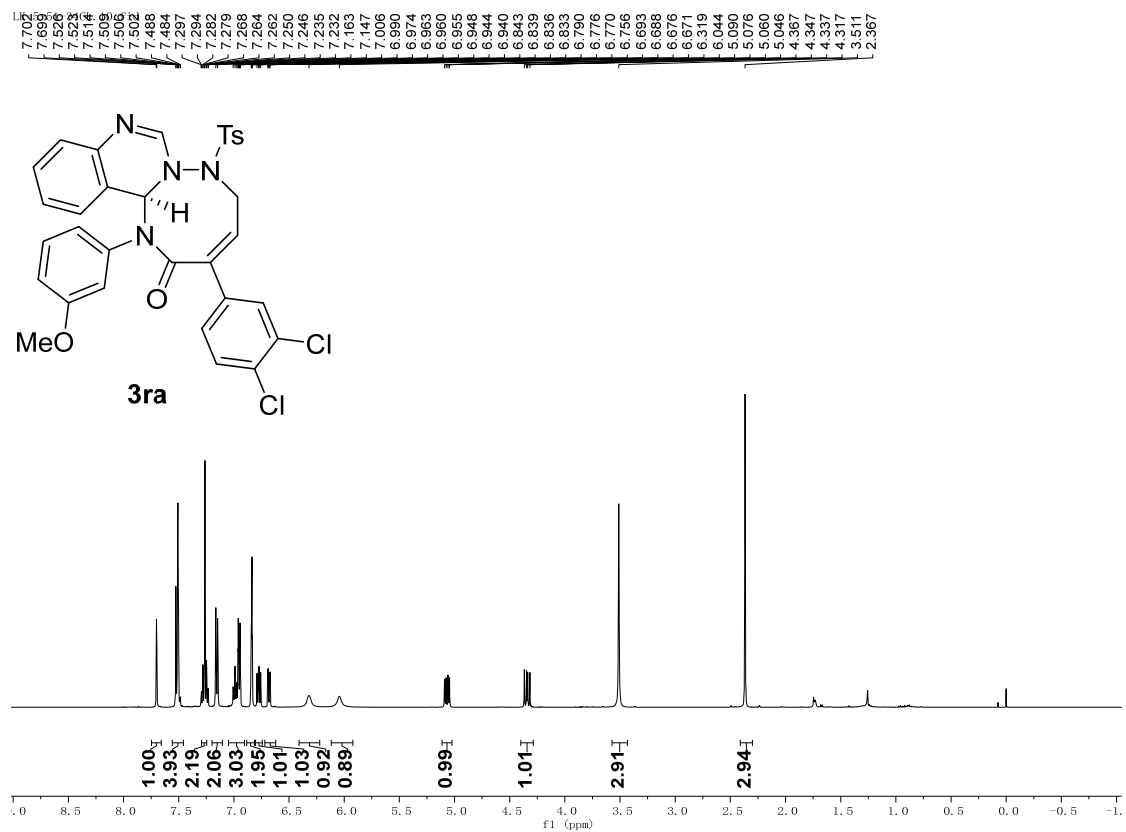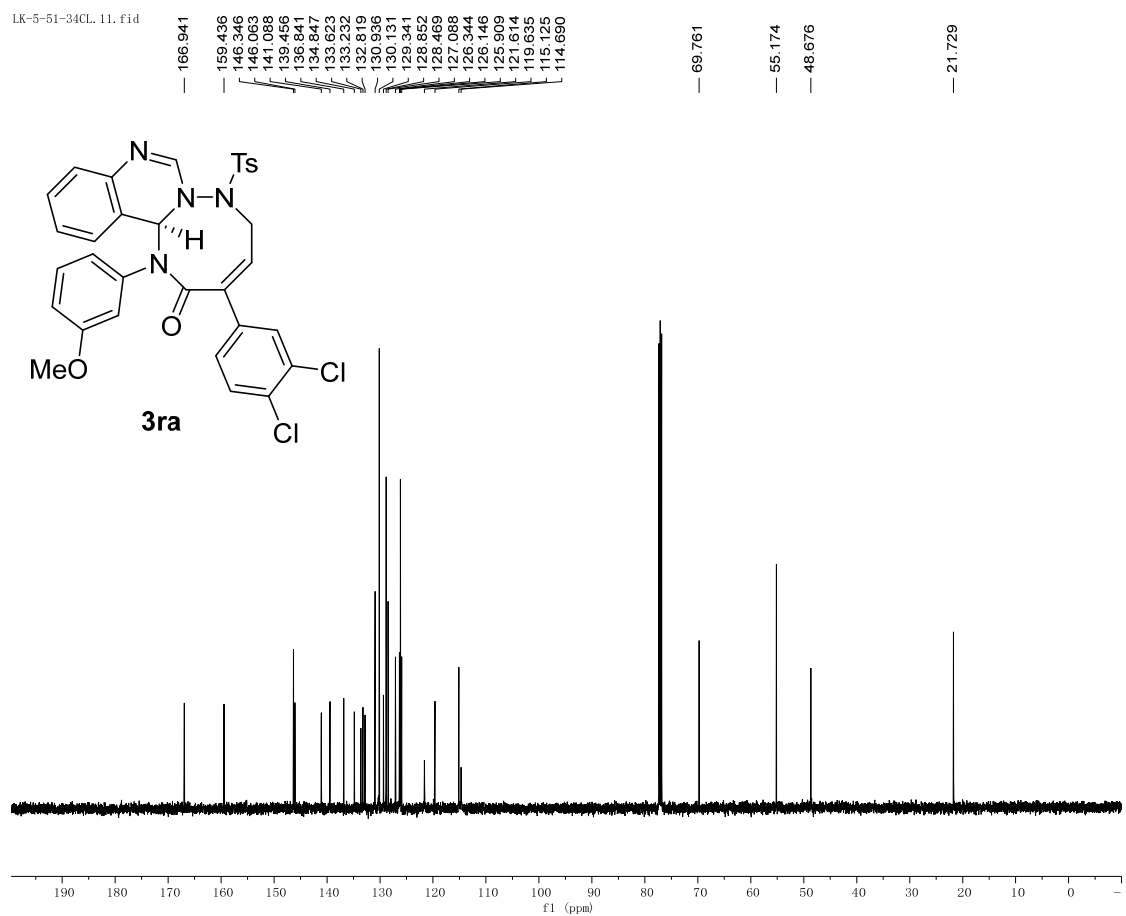

<sup>1</sup>H NMR (500 MHz) and <sup>13</sup>C NMR (125 MHz) spectra of **3ra**

7.723  
7.723  
7.719  
7.566  
7.562  
7.559  
7.546  
7.522  
7.505  
7.333  
7.317  
7.301  
7.298  
7.295  
7.295  
7.286  
7.280  
7.269  
7.265  
7.261  
7.252  
7.248  
7.237  
7.234  
7.146  
7.129  
7.010  
6.994  
6.978  
6.972  
6.969  
6.957  
6.954  
6.948  
6.945  
6.934  
6.930  
6.886  
6.883  
6.785  
6.781  
6.778  
6.765  
6.758  
6.745  
6.693  
6.689  
6.688  
6.678  
6.676  
6.673  
6.671  
6.631  
6.054  
5.100  
5.086  
5.069  
5.056  
4.375  
4.355  
4.345  
3.517  
2.360

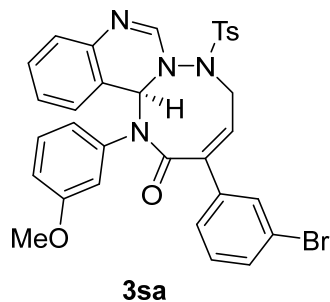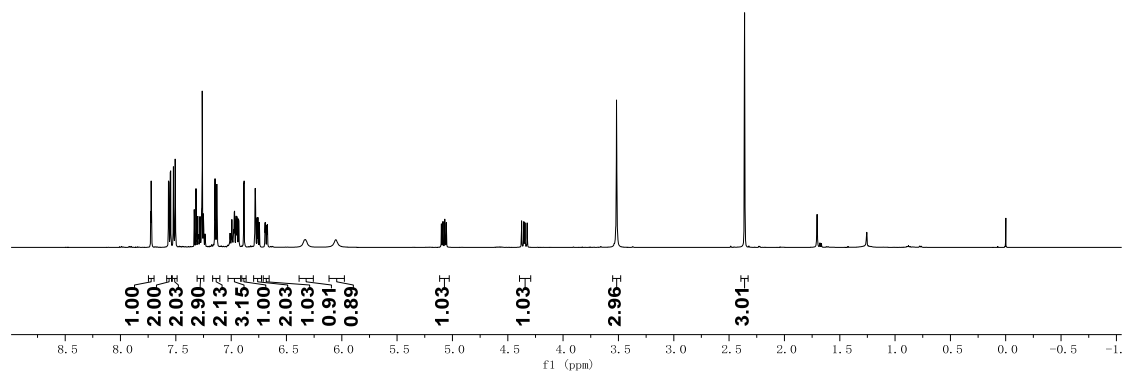

lk-5-57-jbr. 11. fid

167.201  
159.418  
146.445  
145.973  
141.114  
140.310  
136.851  
136.831  
132.836  
132.335  
130.513  
130.100  
130.082  
129.486  
129.322  
128.651  
127.073  
126.295  
126.127  
125.506  
123.081  
121.668  
119.739  
115.148  
114.659  
69.752  
55.176  
48.757  
21.726

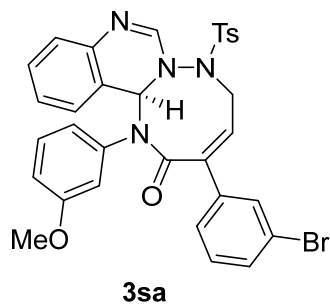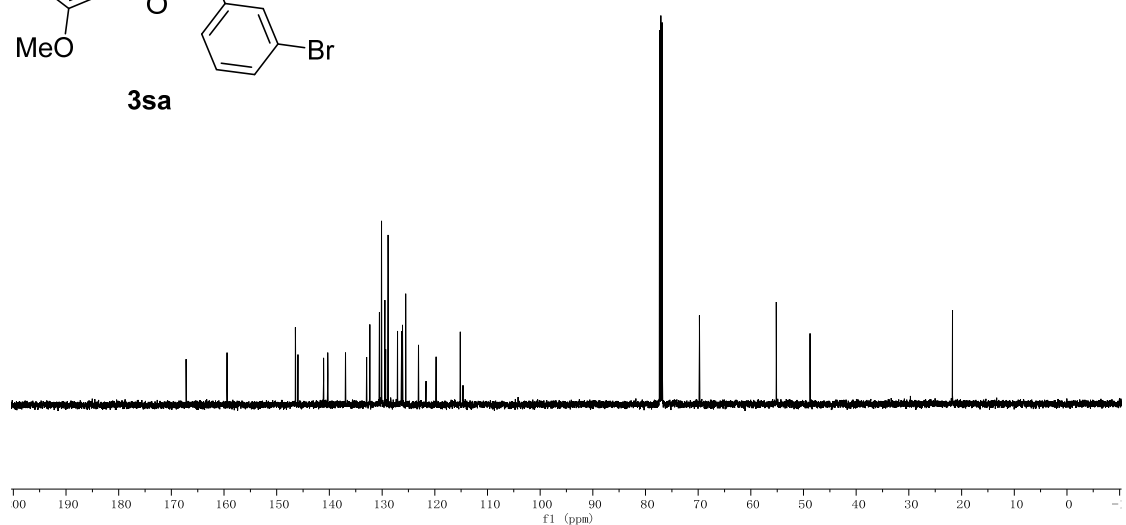

<sup>1</sup>H NMR (500 MHz) and <sup>13</sup>C NMR (125 MHz) spectra of **3sa**

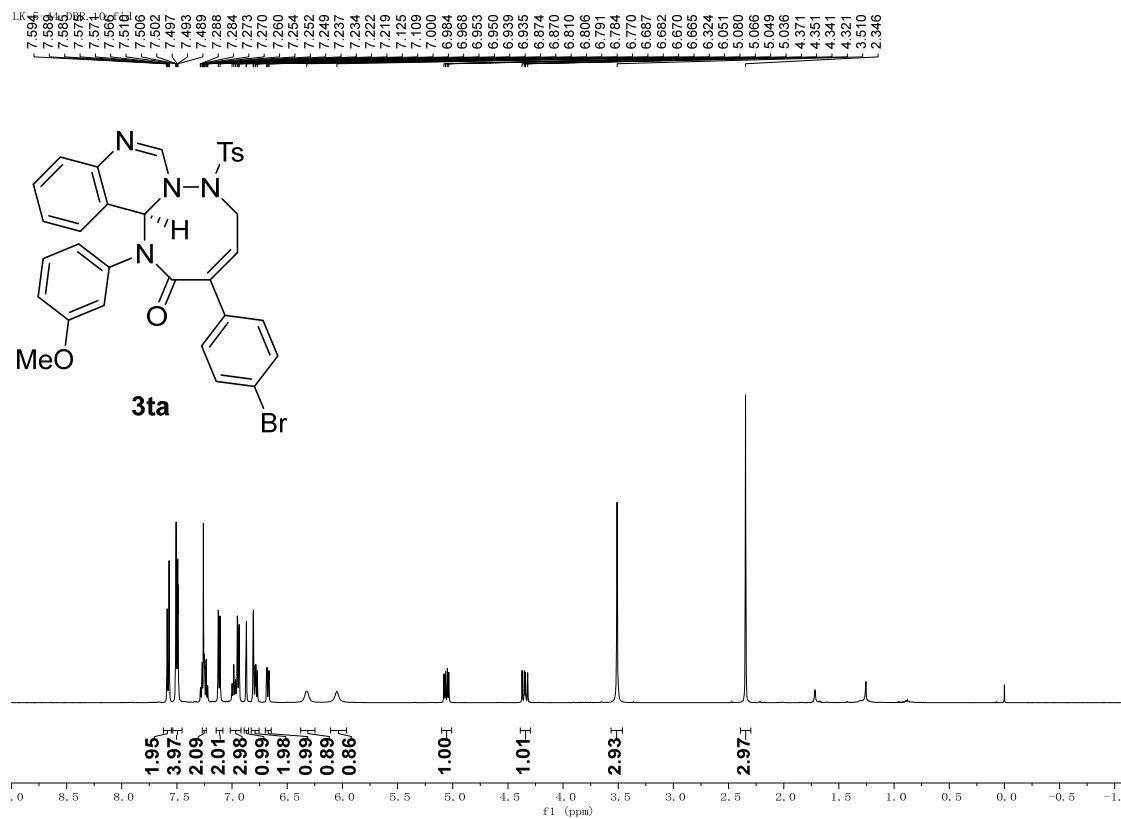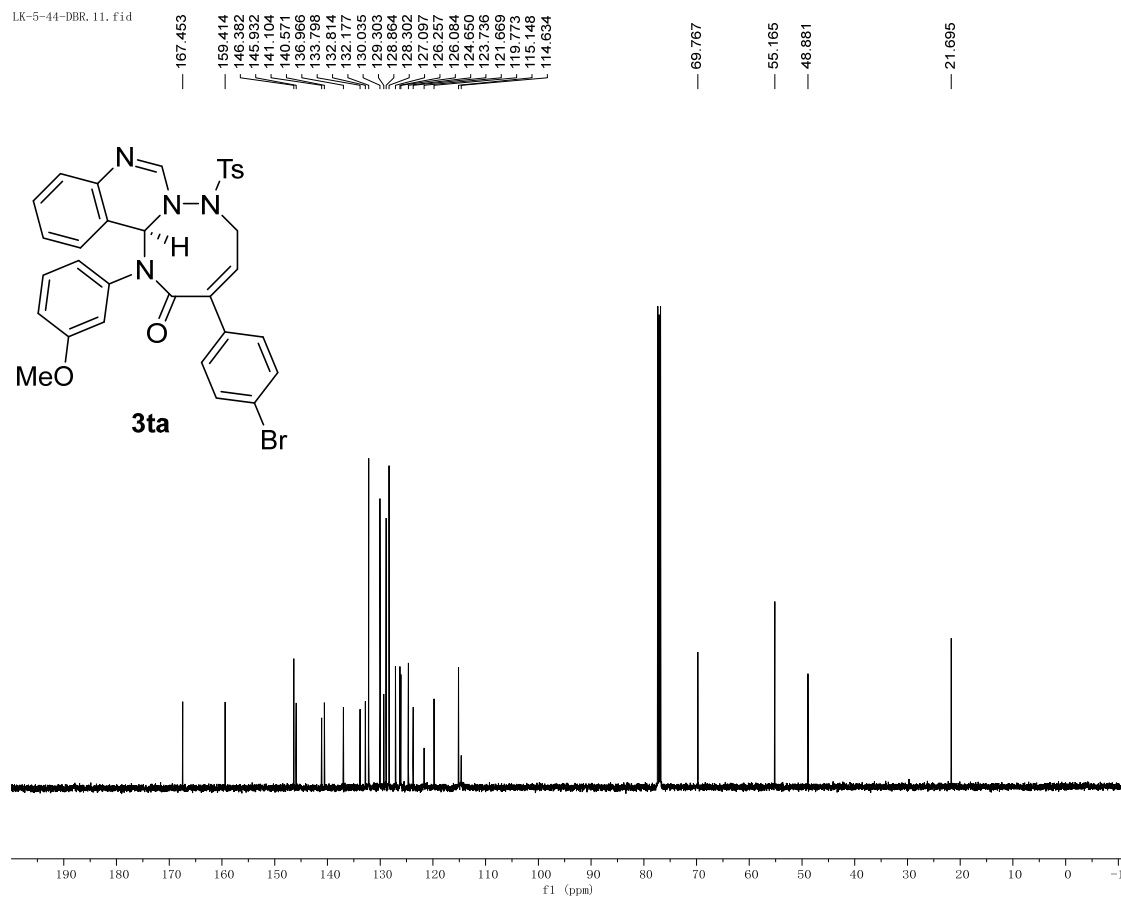

<sup>1</sup>H NMR (500 MHz) and <sup>13</sup>C NMR (125 MHz) spectra of **3ta**

7.511  
7.494  
7.419  
7.417  
7.372  
7.369  
7.360  
7.357  
7.353  
7.348  
7.334  
7.318  
7.285  
7.282  
7.267  
7.252  
7.252  
7.250  
7.246  
7.235  
7.232  
7.228  
7.220  
7.218  
7.098  
7.082  
7.004  
7.004  
6.988  
6.972  
6.961  
6.957  
6.946  
6.942  
6.862  
6.859  
6.834  
6.830  
6.777  
6.763  
6.796  
6.743  
6.686  
6.684  
6.671  
6.670  
6.669  
6.668  
6.664  
6.663  
6.346  
6.069  
5.089  
5.076  
5.059  
5.045  
4.362  
4.352  
4.332  
3.516  
2.430  
2.330

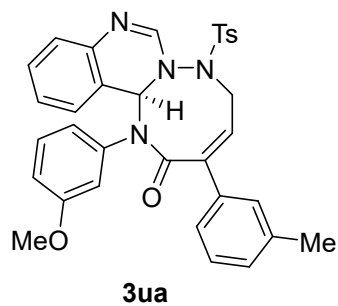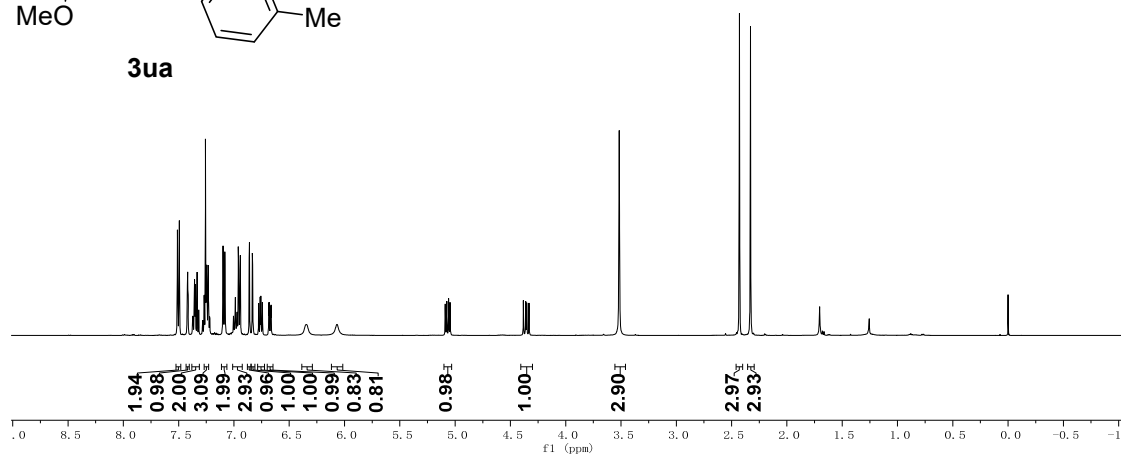

lk-5-50-jme. 11. fid

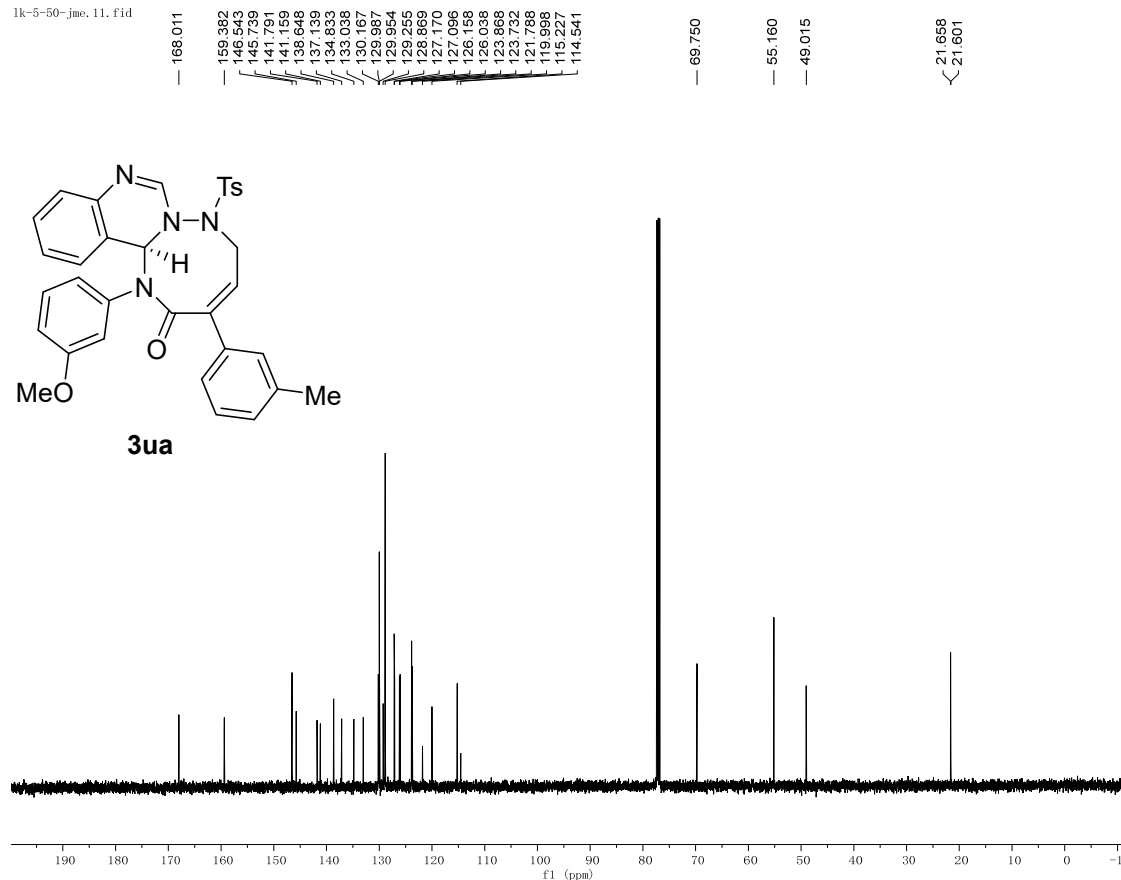

$^1\text{H}$  NMR (500 MHz) and  $^{13}\text{C}$  NMR (125 MHz) spectra of **3ua**

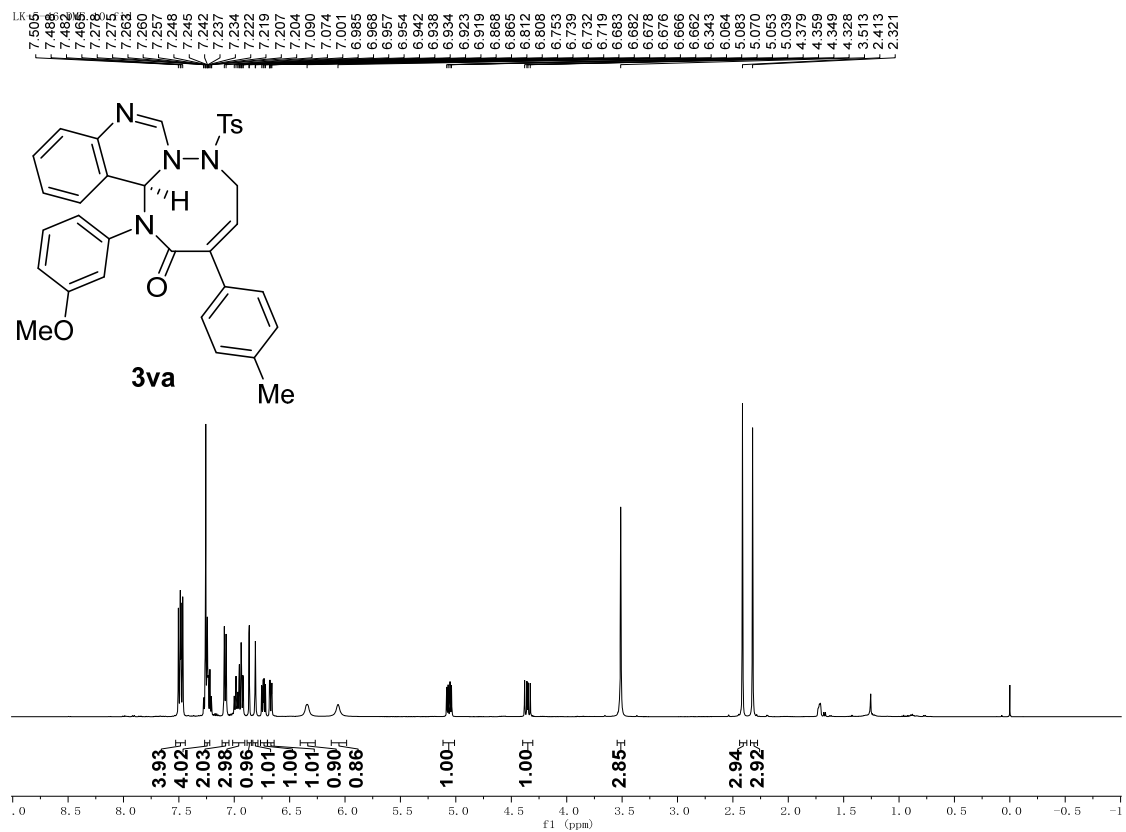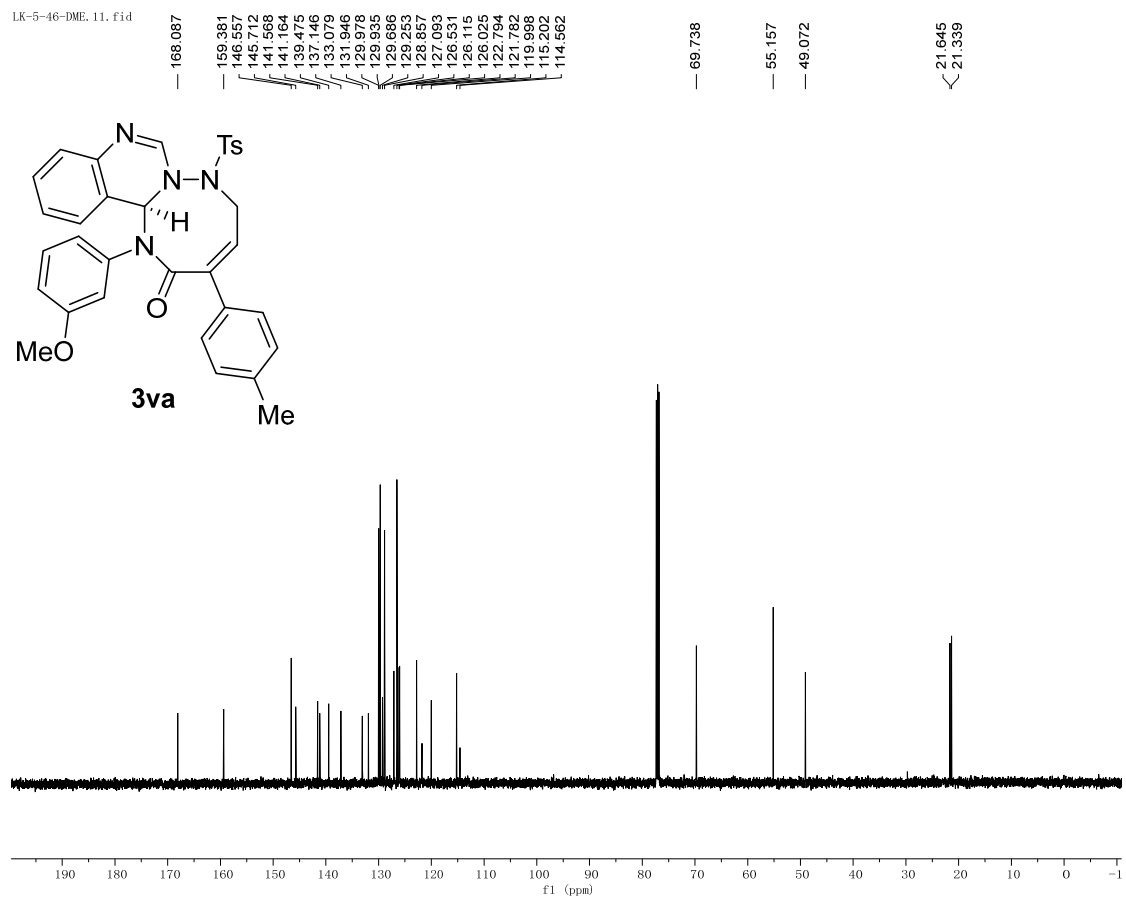

$^1\text{H}$  NMR (500 MHz) and  $^{13}\text{C}$  NMR (125 MHz) spectra of **3va**

7.512, 7.507, 7.503, 7.499, 7.495, 7.491, 7.486, 7.482, 7.478, 7.315, 7.298, 7.280, 7.276, 7.265, 7.256, 7.250, 7.246, 7.243, 7.233, 7.229, 7.217, 7.214, 7.073, 7.056, 6.999, 6.983, 6.967, 6.962, 6.959, 6.956, 6.947, 6.944, 6.940, 6.874, 6.870, 6.794, 6.790, 6.760, 6.747, 6.740, 6.726, 6.682, 6.680, 6.677, 6.675, 6.666, 6.660, 6.659, 6.348, 6.071, 6.071, 5.081, 5.067, 5.050, 5.037, 4.382, 4.362, 4.352, 4.331, 3.513, 2.985, 2.971, 2.957, 2.943, 2.307, 1.309, 1.306, 1.296, 1.292

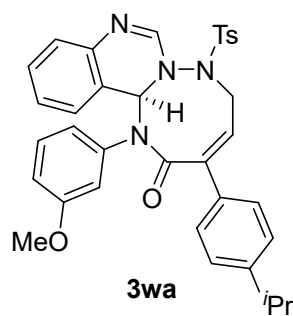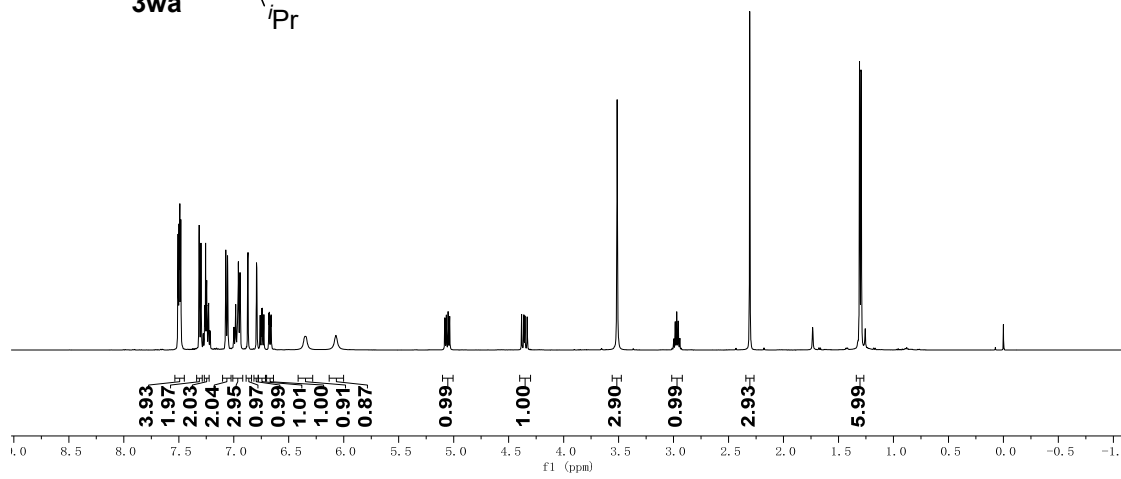

LK-5-53-DIPR\_11.fid

168.091, 159.378, 150.337, 146.571, 145.671, 141.600, 141.187, 137.181, 133.092, 132.337, 129.960, 129.929, 129.241, 128.862, 127.124, 127.088, 126.989, 126.109, 125.816, 124.788, 120.012, 115.198, 114.583

69.747, 55.159, 49.098, 33.998, 23.910, 21.635

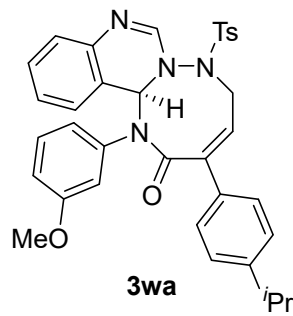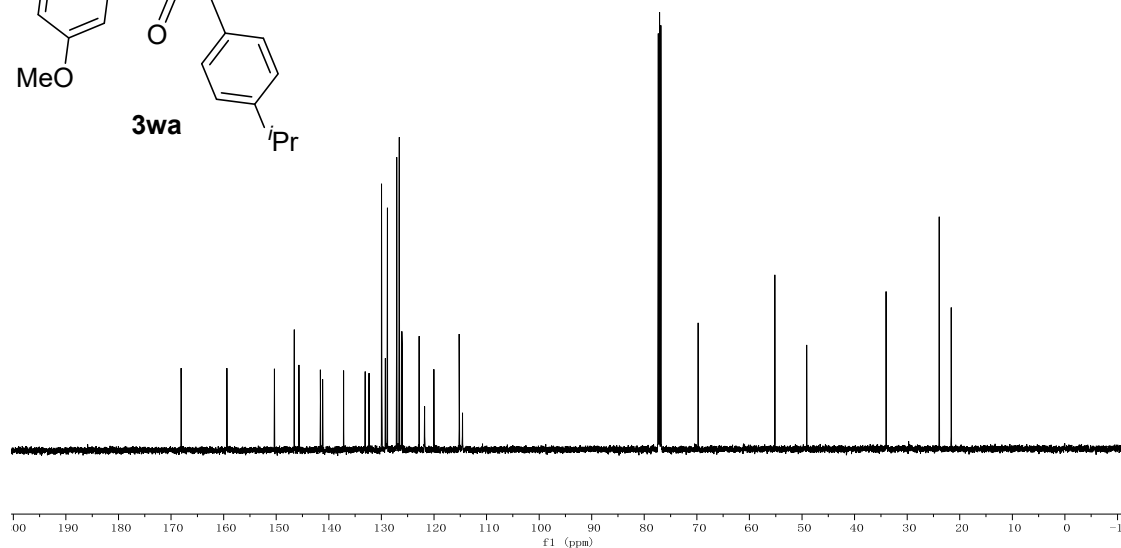

<sup>1</sup>H NMR (500 MHz) and <sup>13</sup>C NMR (125 MHz) spectra of **3wa**

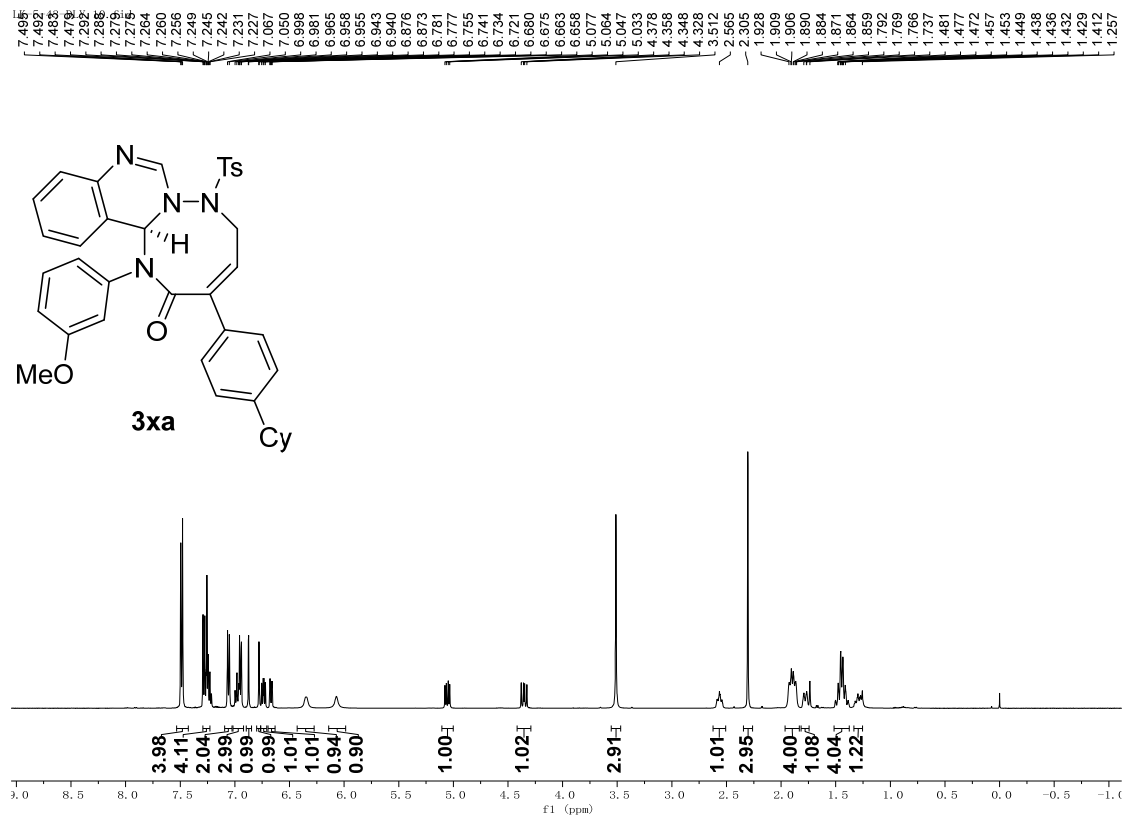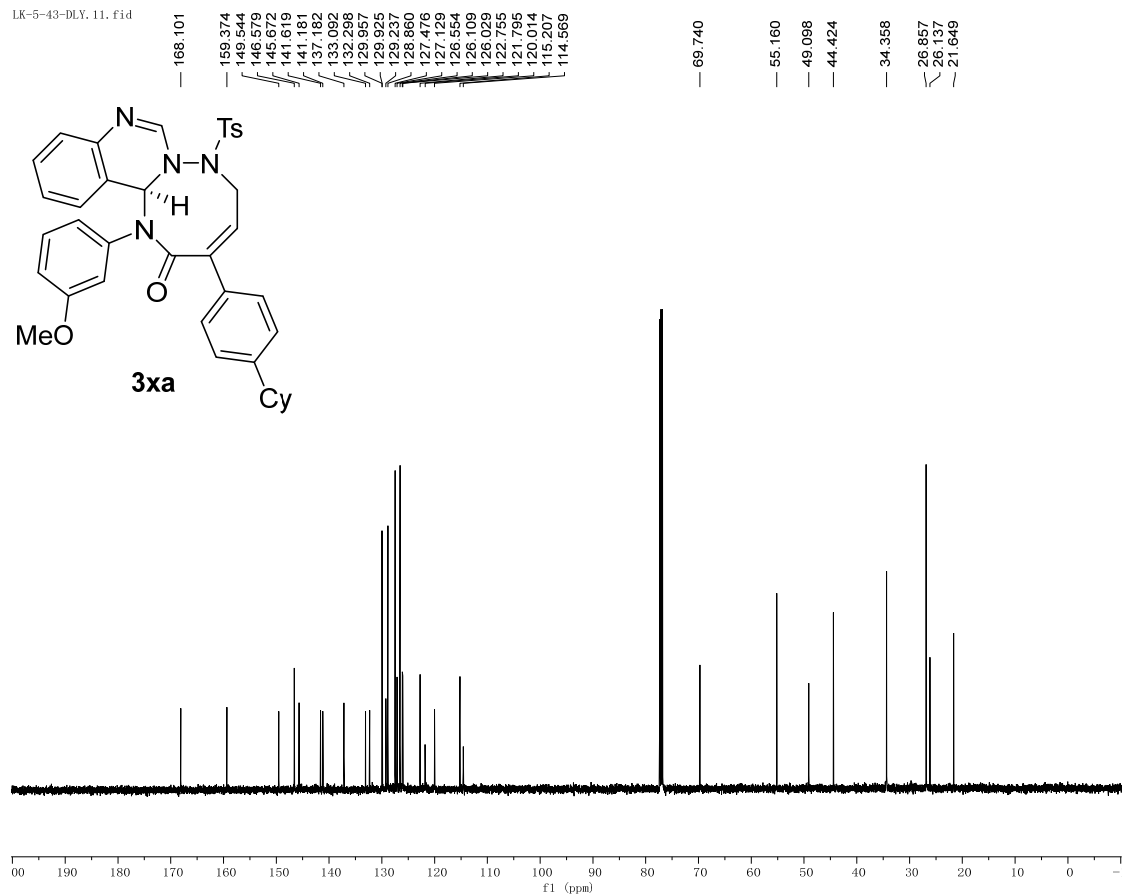

$^1\text{H}$  NMR (500 MHz) and  $^{13}\text{C}$  NMR (125 MHz) spectra of **3xa**



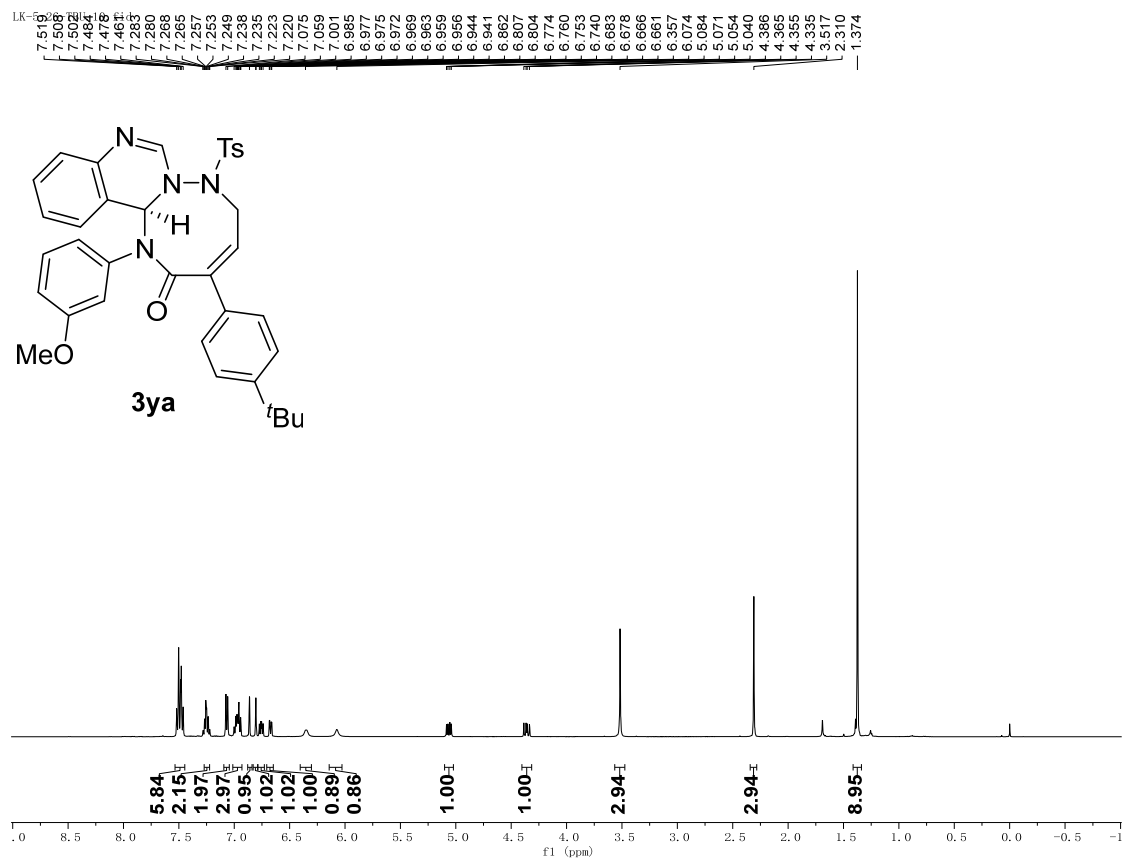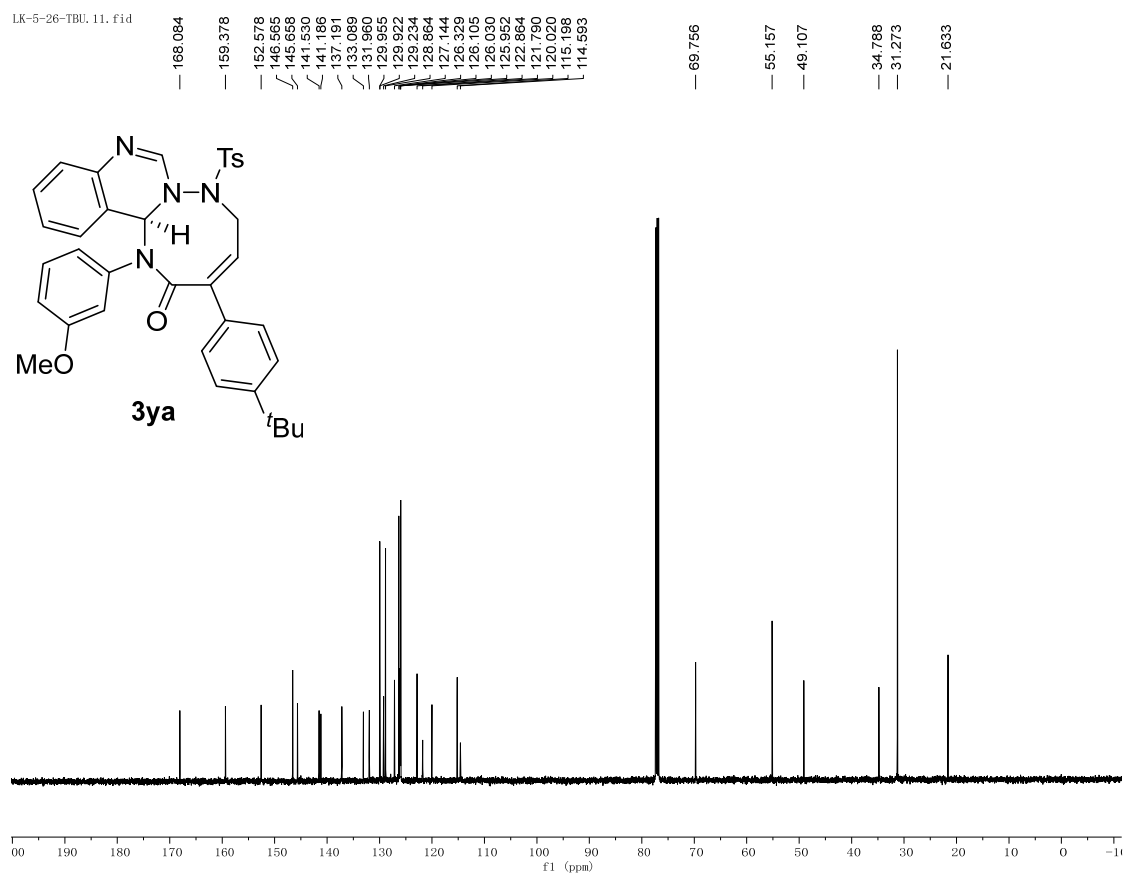

$^1\text{H}$  NMR (500 MHz) and  $^{13}\text{C}$  NMR (125 MHz) spectra of **3ya**

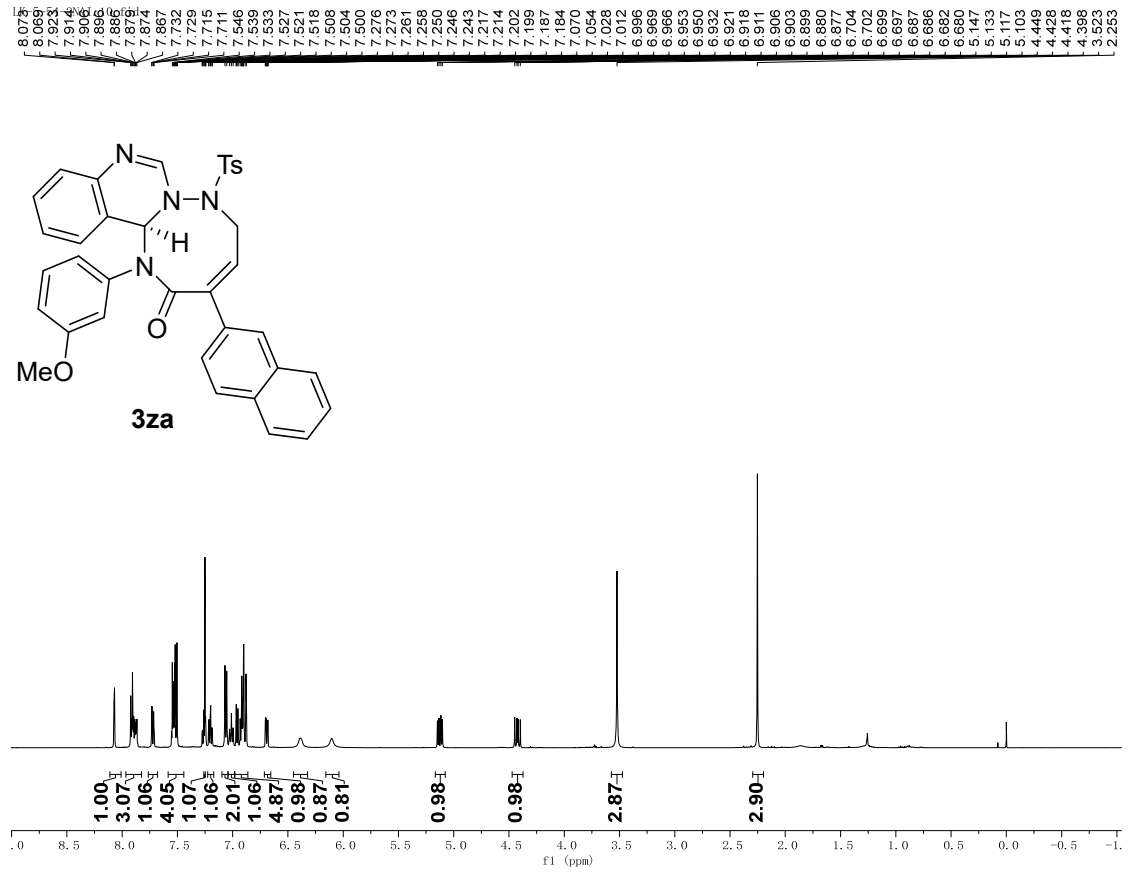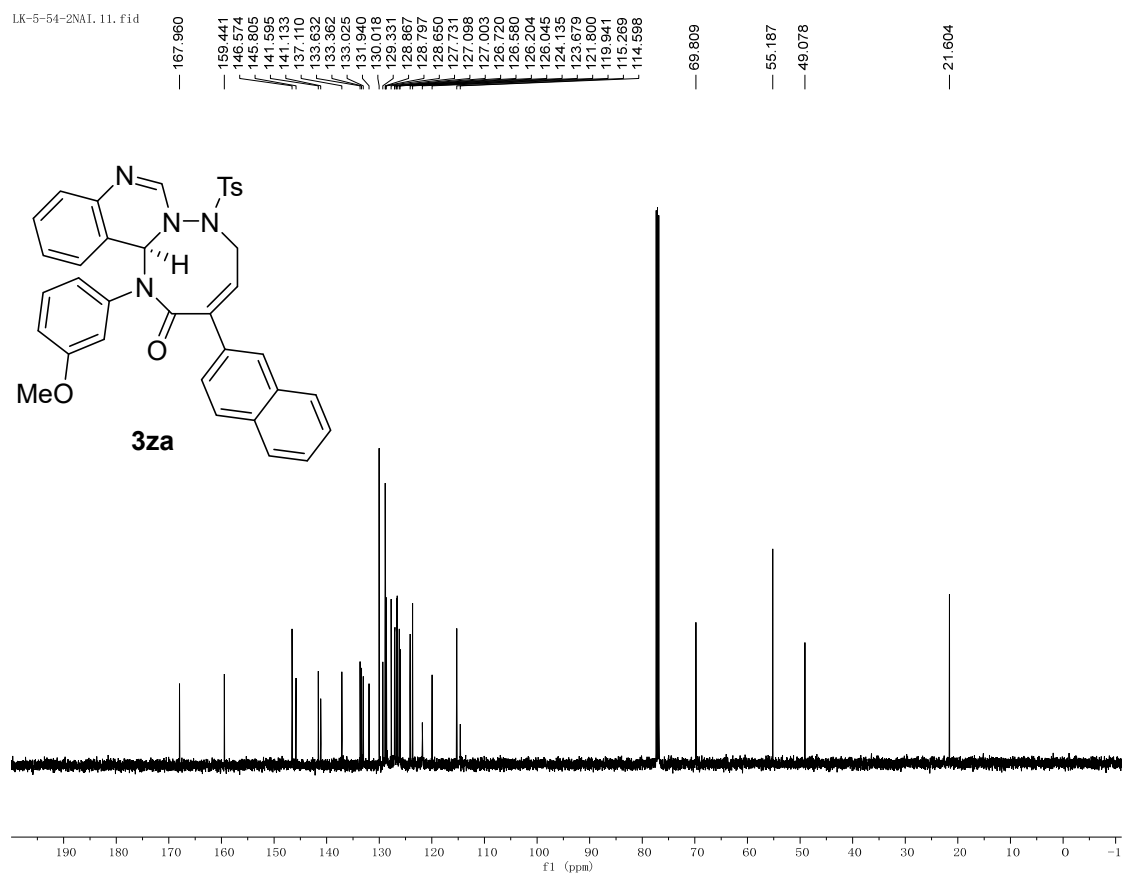

<sup>1</sup>H NMR (500 MHz) and <sup>13</sup>C NMR (125 MHz) spectra of **3za**

7.555  
7.550  
7.545  
7.540  
7.535  
7.530  
7.516  
7.513  
7.509  
7.499  
7.495  
7.412  
7.406  
7.402  
7.396  
7.396  
7.382  
7.382  
7.362  
7.354  
7.276  
7.273  
7.260  
7.260  
7.257  
7.242  
7.242  
7.231  
7.227  
7.216  
7.213  
7.201  
7.198  
7.116  
7.100  
7.002  
6.986  
6.970  
6.956  
6.941  
6.941  
6.938  
6.915  
6.911  
6.900  
6.896  
6.890  
6.890  
6.876  
6.768  
6.747  
6.733  
6.727  
6.713  
6.687  
6.685  
6.682  
6.680  
6.670  
6.668  
6.665  
6.663  
6.330  
6.052  
6.051  
5.074  
5.060  
5.043  
5.030  
4.369  
4.339  
4.319  
3.511  
2.335

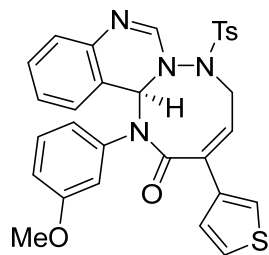

**3z'a**

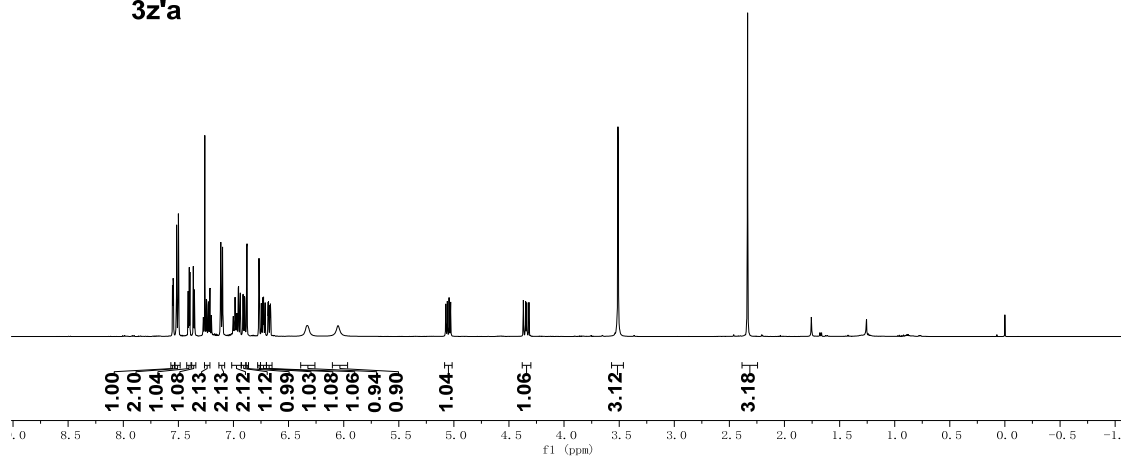

LK-5-59-SF. 23. fid

167.639  
159.387  
146.481  
145.796  
141.145  
137.102  
136.895  
135.968  
133.030  
130.006  
129.957  
129.277  
128.641  
126.965  
126.923  
126.028  
125.310  
124.559  
122.452  
121.728  
119.912  
115.175  
114.617  
69.670  
55.157  
48.927  
21.672

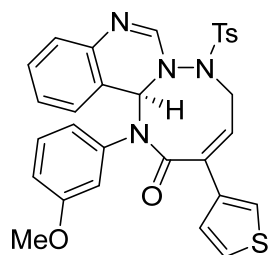

**3z'a**

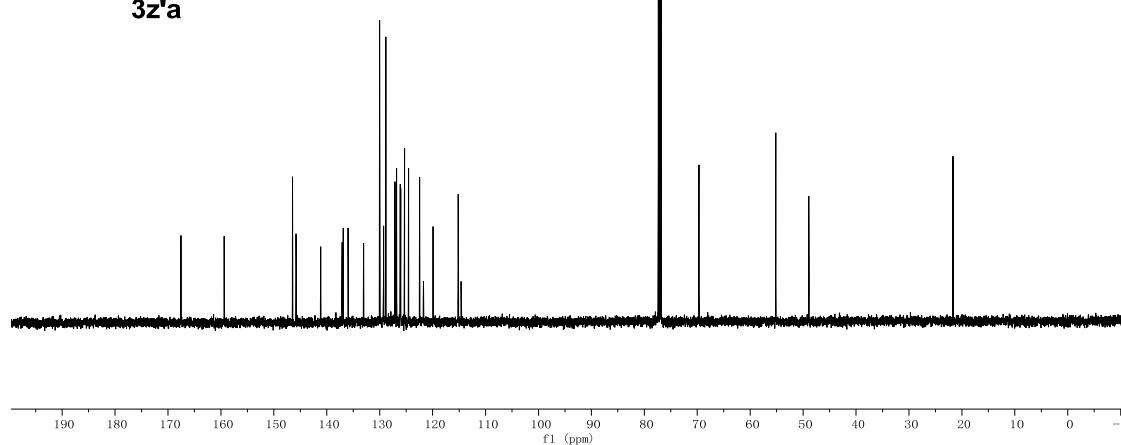

<sup>1</sup>H NMR (500 MHz) and <sup>13</sup>C NMR (125 MHz) spectra of **3z'a**

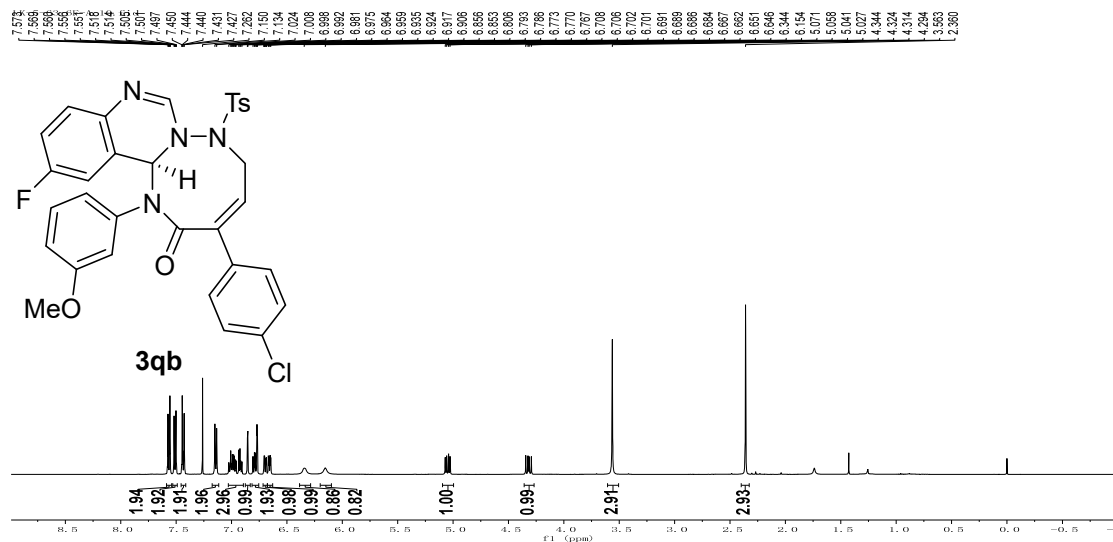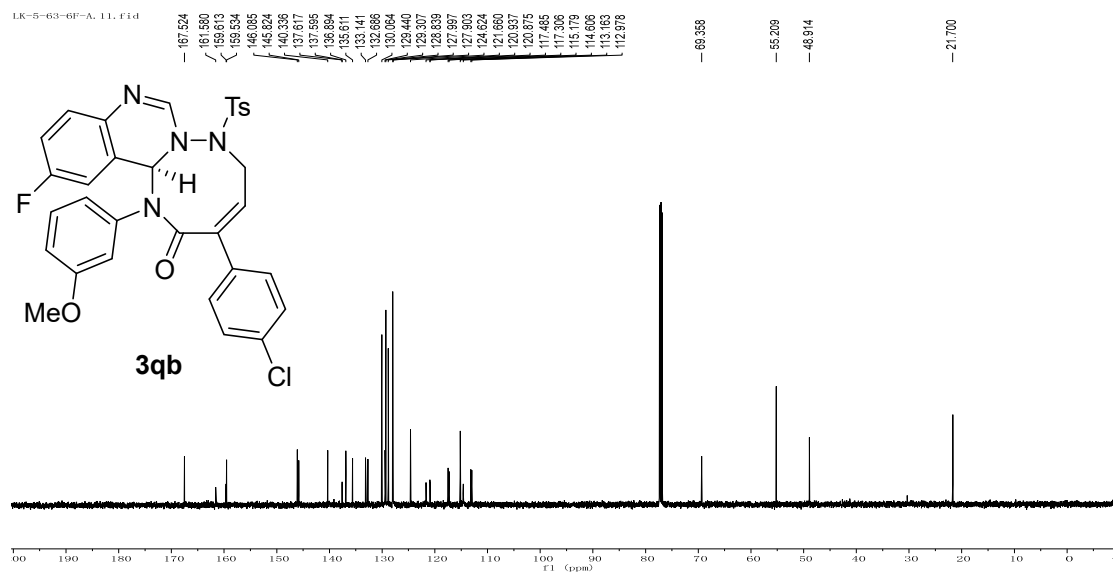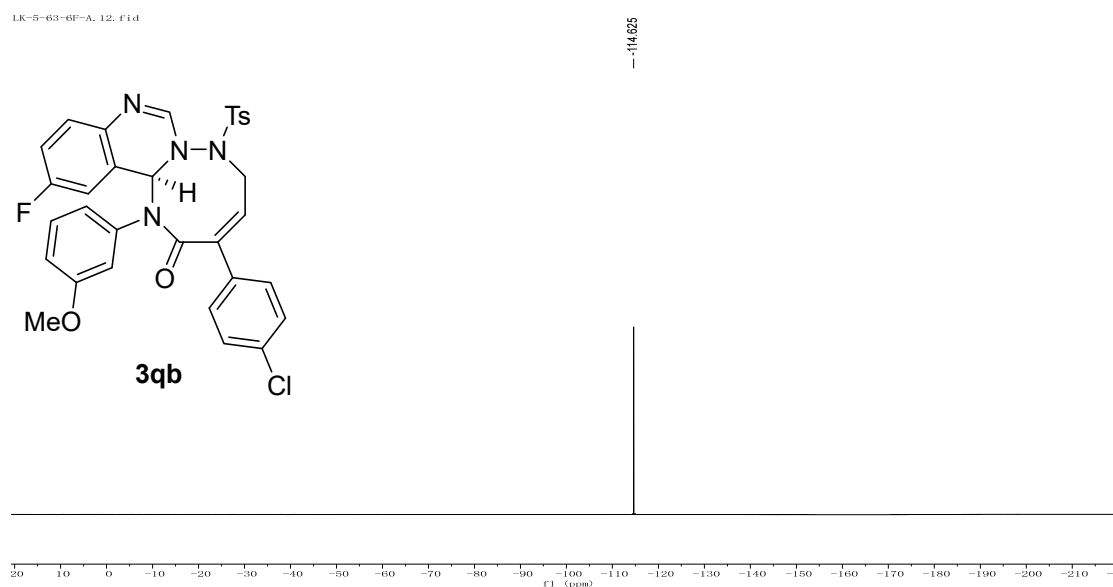

$^1\text{H}$  NMR (500 MHz),  $^{13}\text{C}$  NMR (125 MHz) and  $^{19}\text{F}$  NMR (470 MHz) spectra of **3qb**

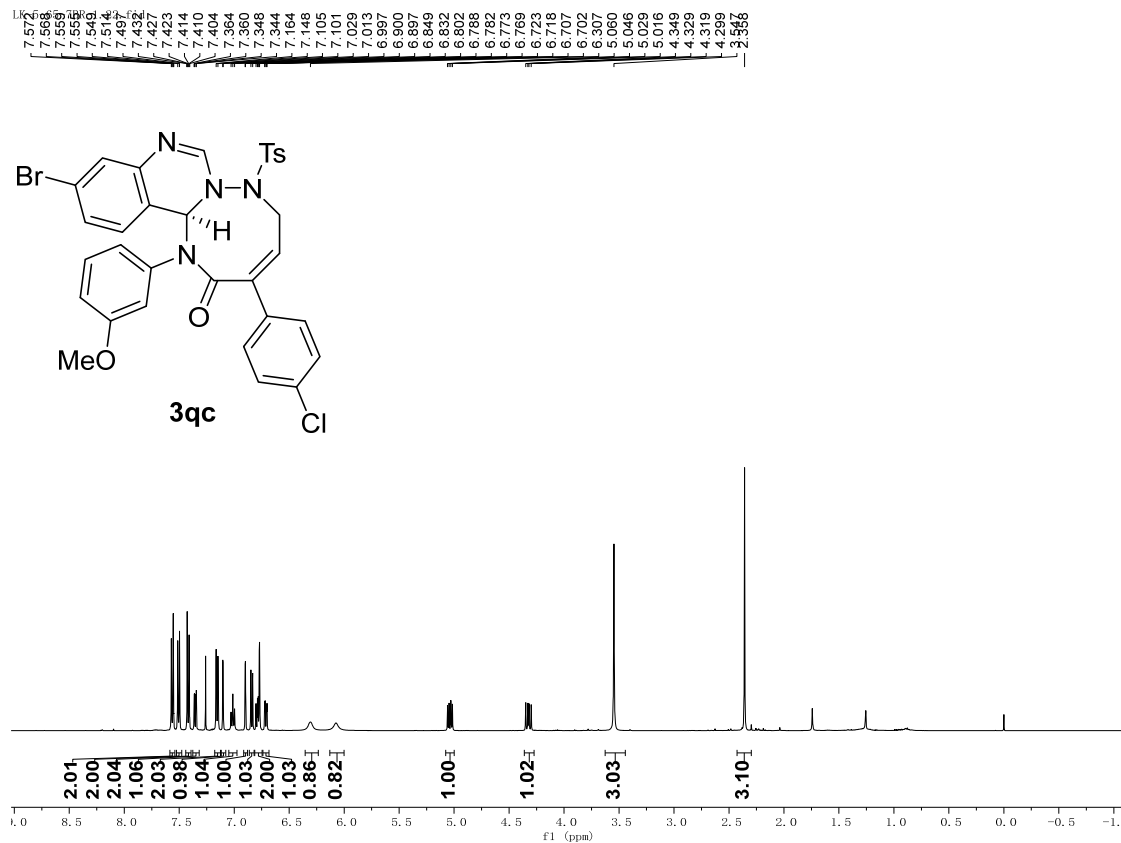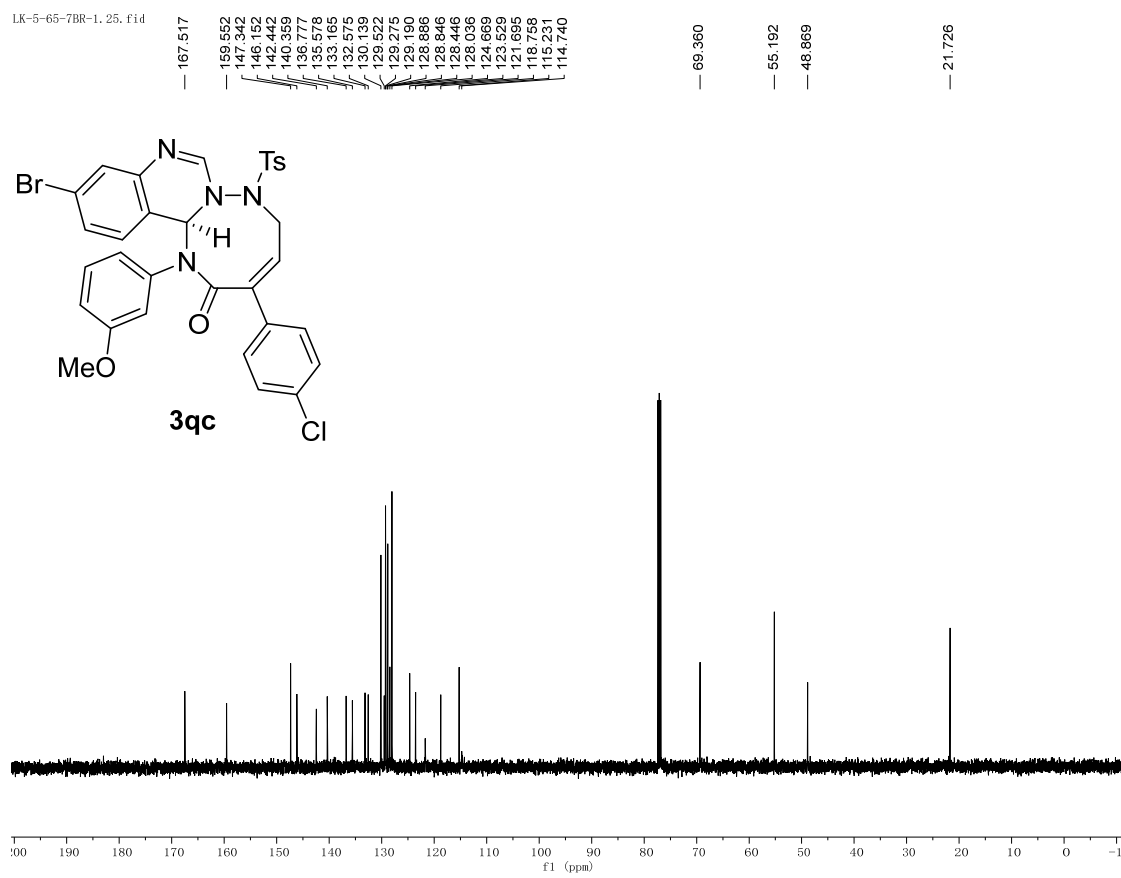

<sup>1</sup>H NMR (500 MHz) and <sup>13</sup>C NMR (125 MHz) spectra of **3qc**

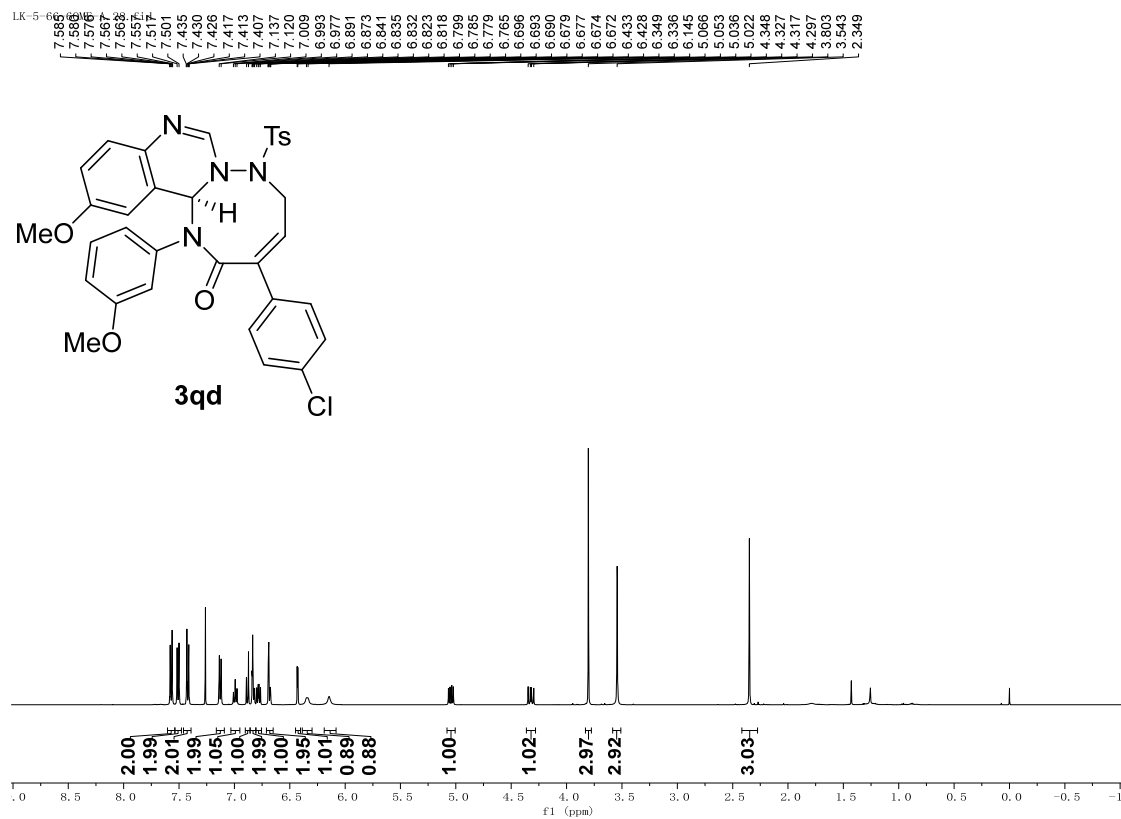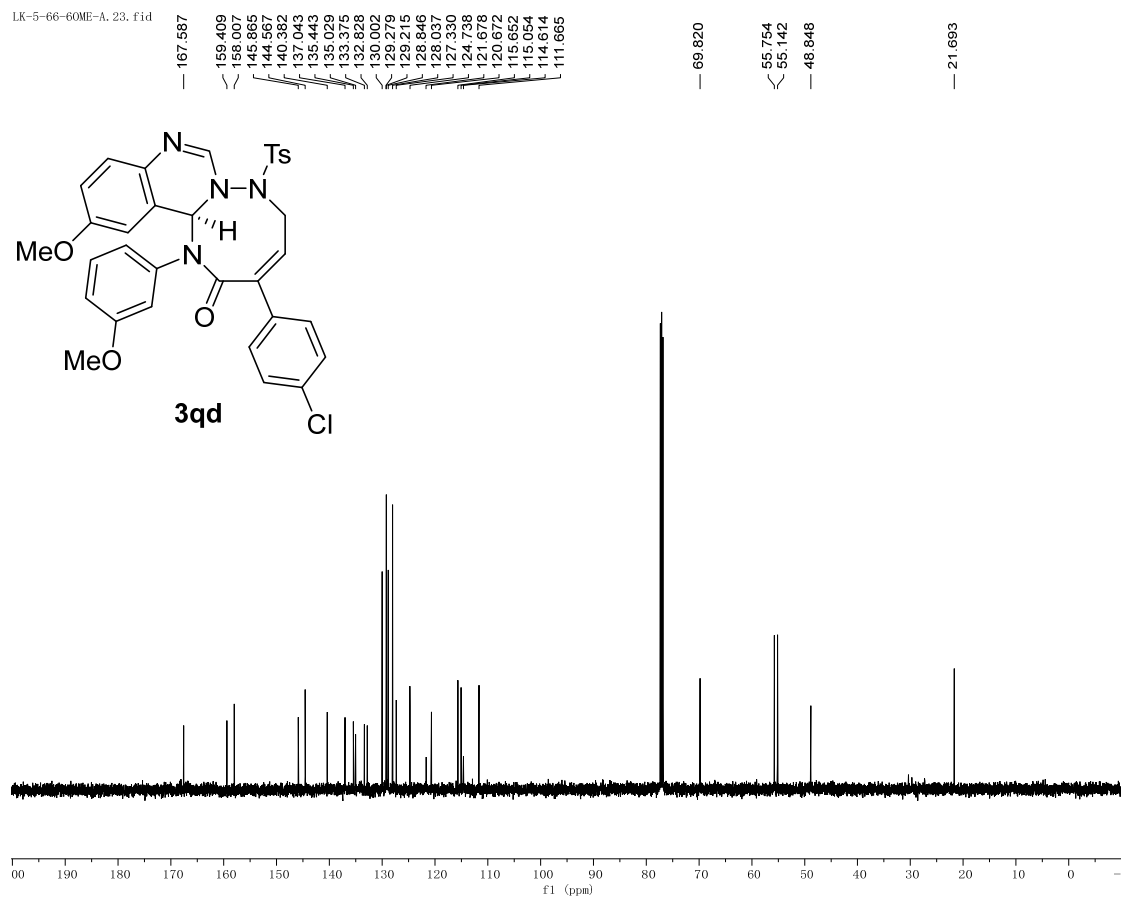

<sup>1</sup>H NMR (500 MHz) and <sup>13</sup>C NMR (125 MHz) spectra of **3qd**

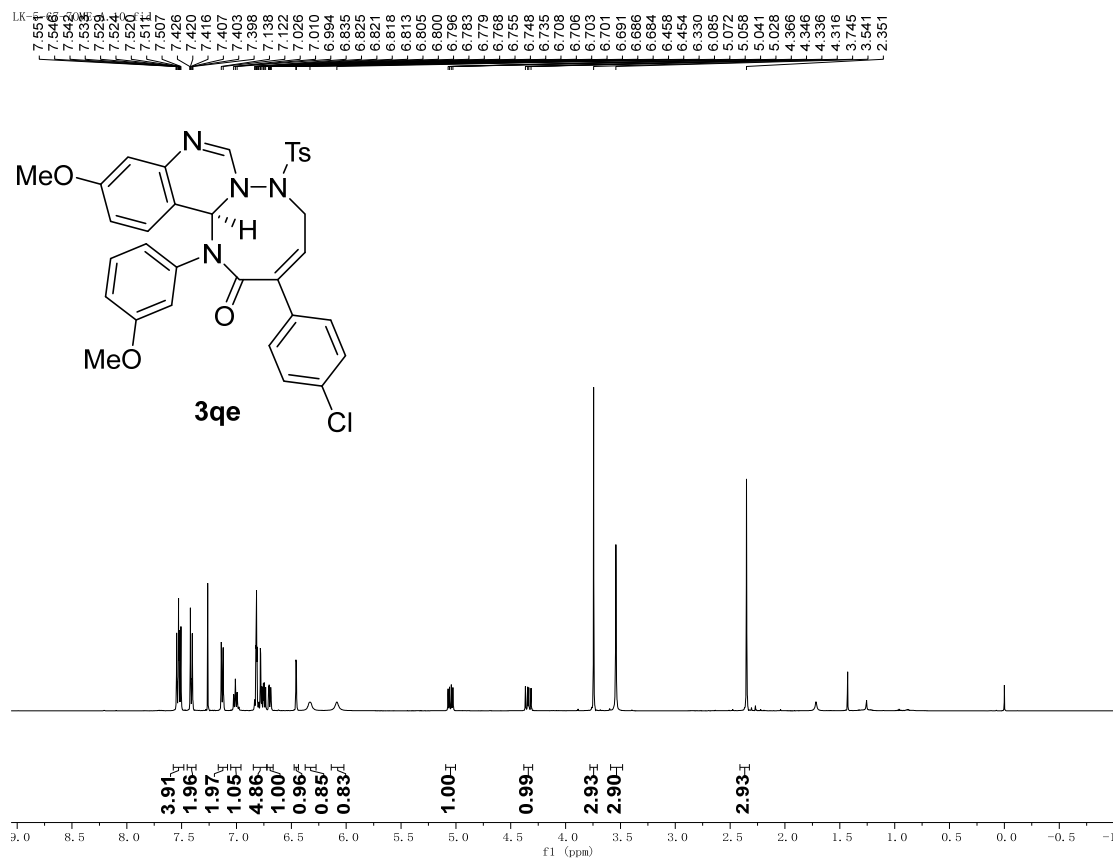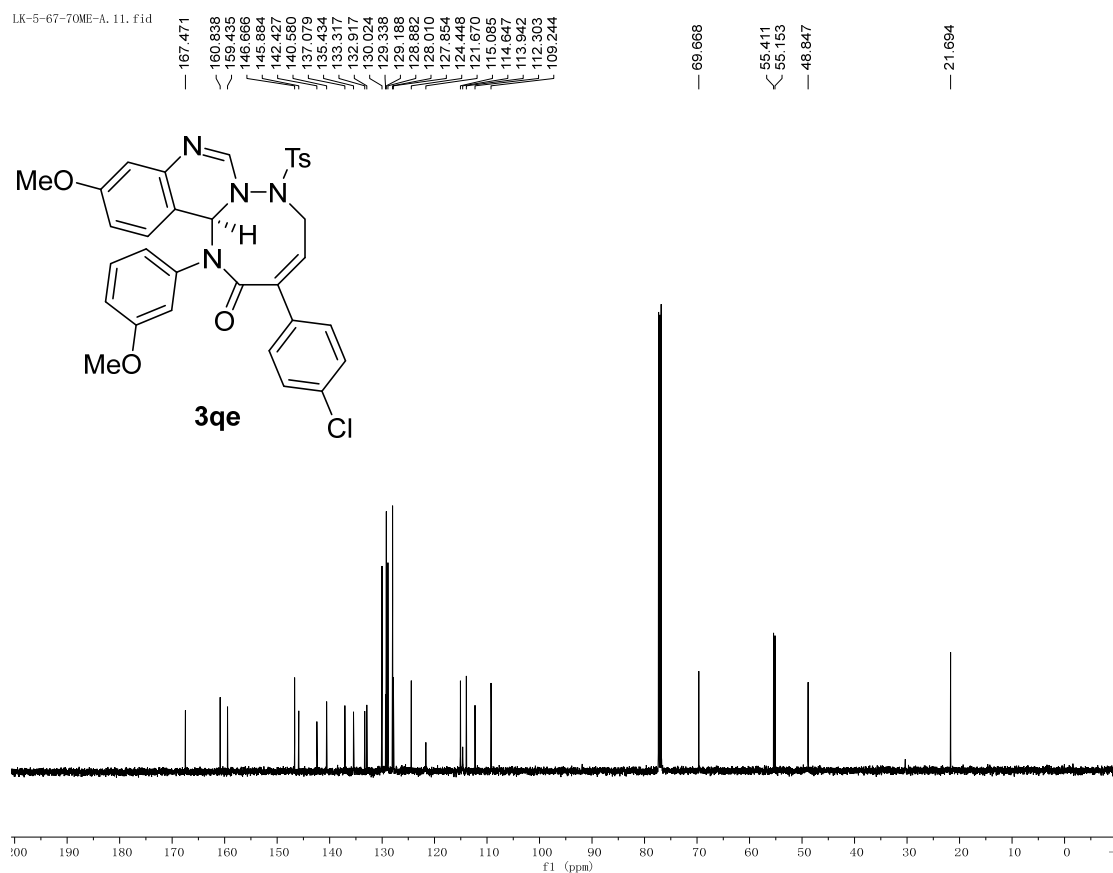

$^1\text{H}$  NMR (500 MHz) and  $^{13}\text{C}$  NMR (125 MHz) spectra of **3qe**

7.6416  
7.6338  
7.6336  
7.6224  
7.6211  
7.5778  
7.5773  
7.5741  
7.5667  
7.5558  
7.5448  
7.5444  
7.5339  
7.4371  
7.437  
7.427  
7.418  
7.414  
7.346  
7.343  
7.331  
7.330  
7.315  
7.298  
7.296  
7.273  
7.260  
7.257  
7.251  
7.248  
7.236  
7.233  
7.221  
7.218  
7.204  
6.988  
6.971  
6.961  
6.958  
6.945  
6.942  
6.929  
6.926  
6.914  
6.911  
6.832  
6.829  
6.805  
6.803  
6.791  
6.791  
6.793  
6.600  
6.598  
6.585  
6.683  
6.673  
6.672  
6.666  
6.667  
5.104  
5.090  
5.074  
5.060  
4.388  
4.368  
4.358  
4.338  
3.512

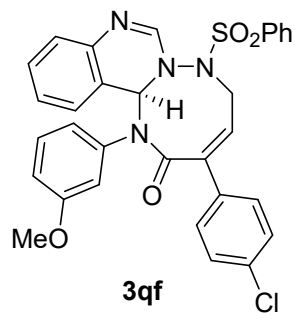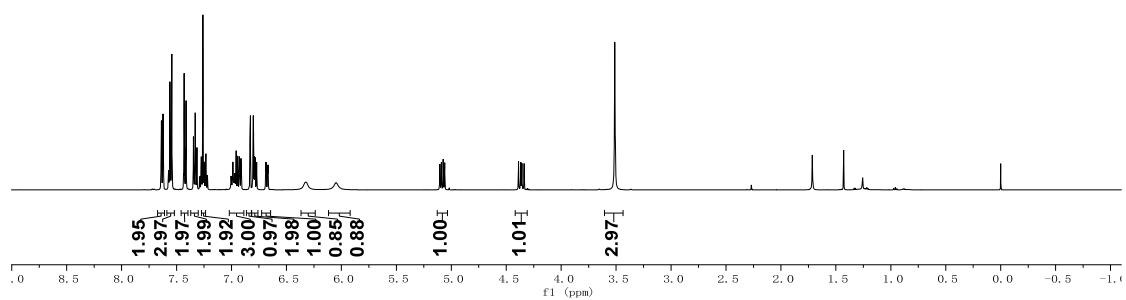

LK-5-69-PH-PH. 11. f1.d

167.488  
159.419  
146.271  
141.042  
140.638  
136.927  
135.852  
135.530  
134.555  
133.203  
130.098  
129.417  
129.328  
129.256  
128.842  
125.006  
127.080  
126.336  
120.123  
121.361  
121.663  
119.763  
115.184  
114.628

69.796  
55.173  
48.836

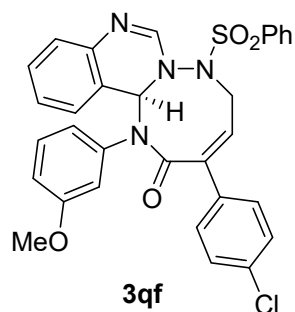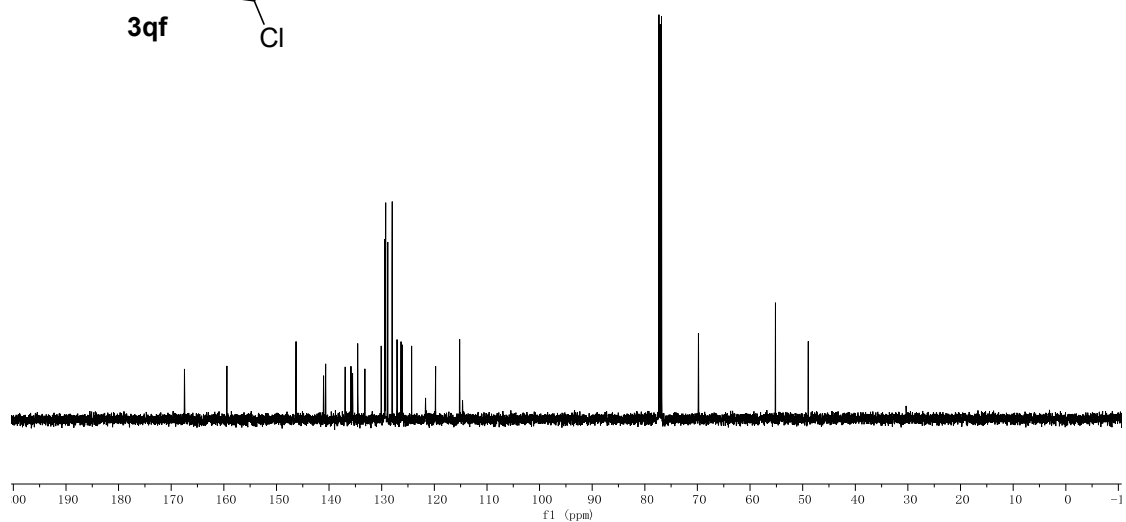

<sup>1</sup>H NMR (500 MHz) and <sup>13</sup>C NMR (125 MHz) spectra of **3qf**



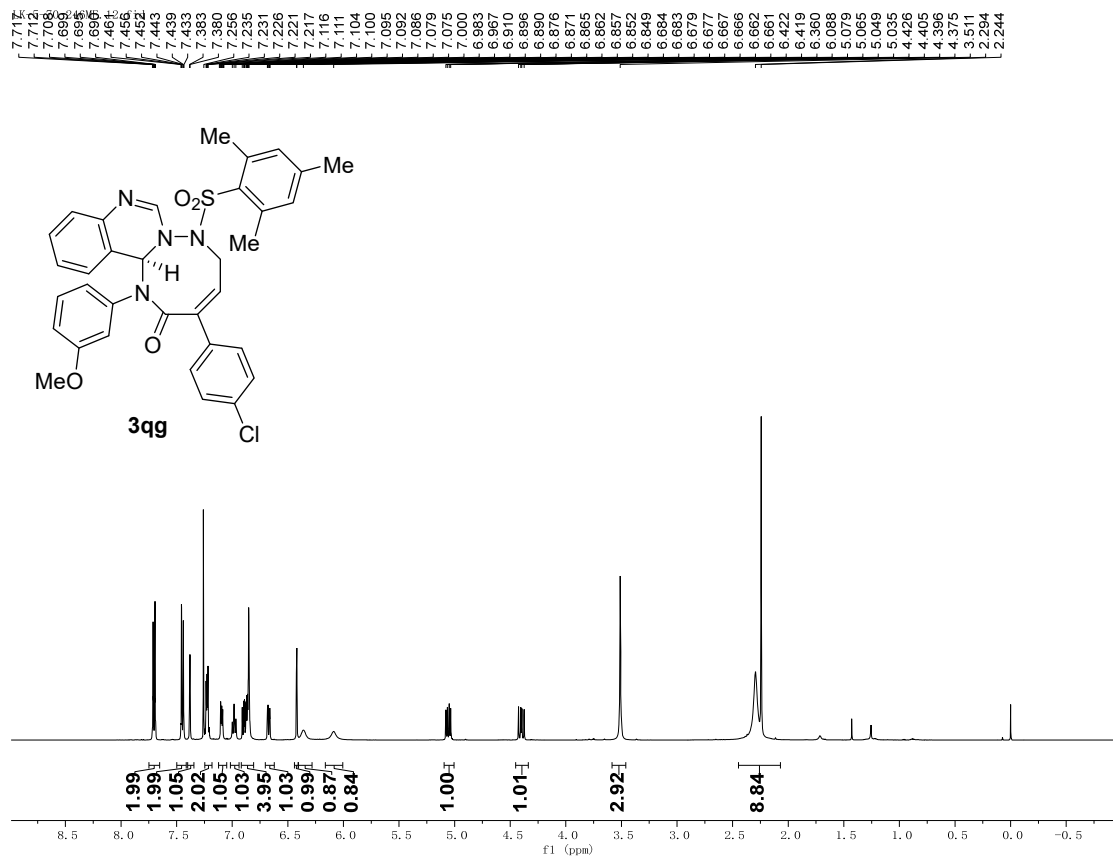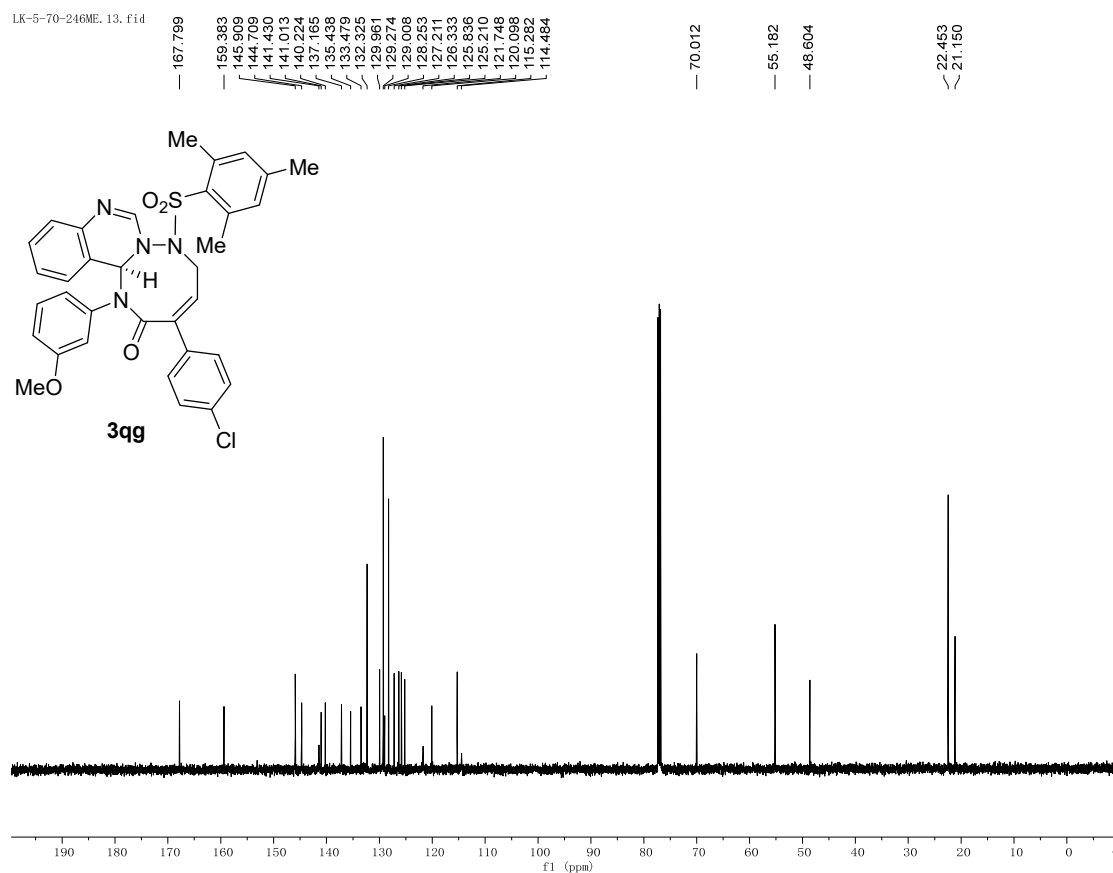

$^1\text{H}$  NMR (500 MHz) and  $^{13}\text{C}$  NMR (125 MHz) spectra of **3qg**

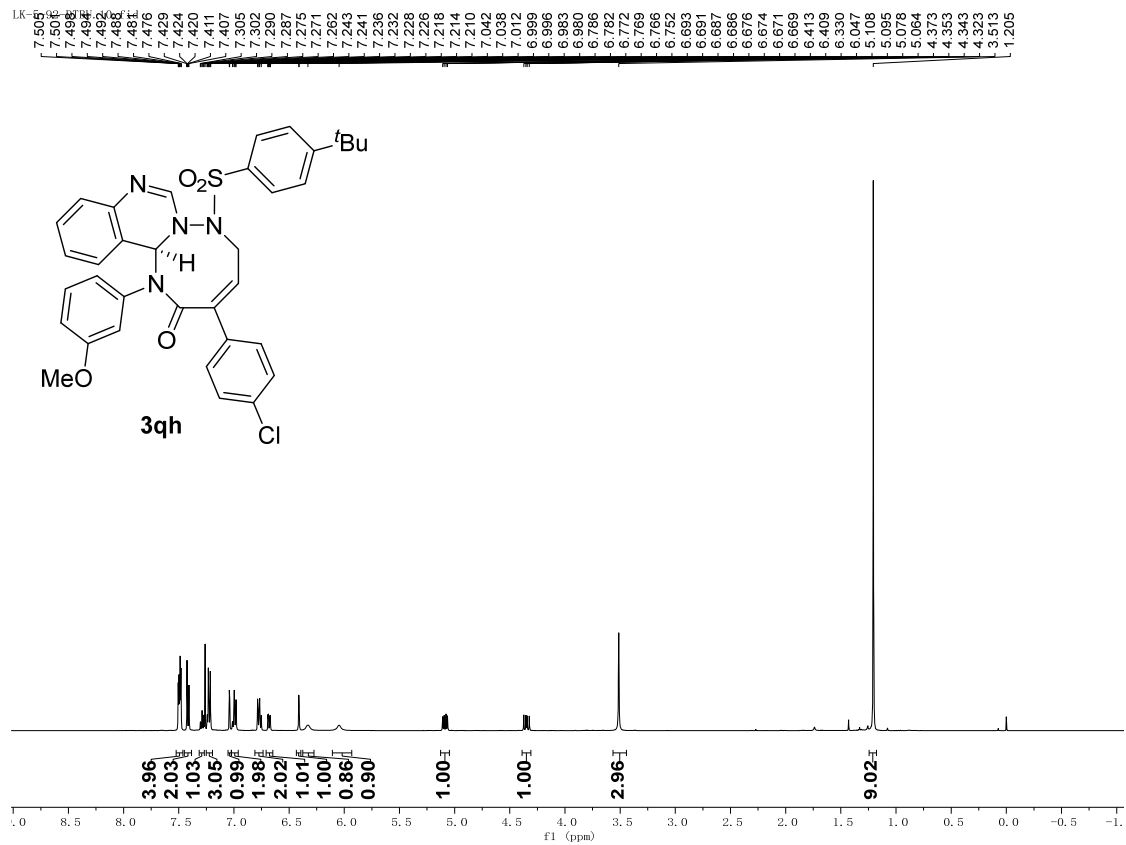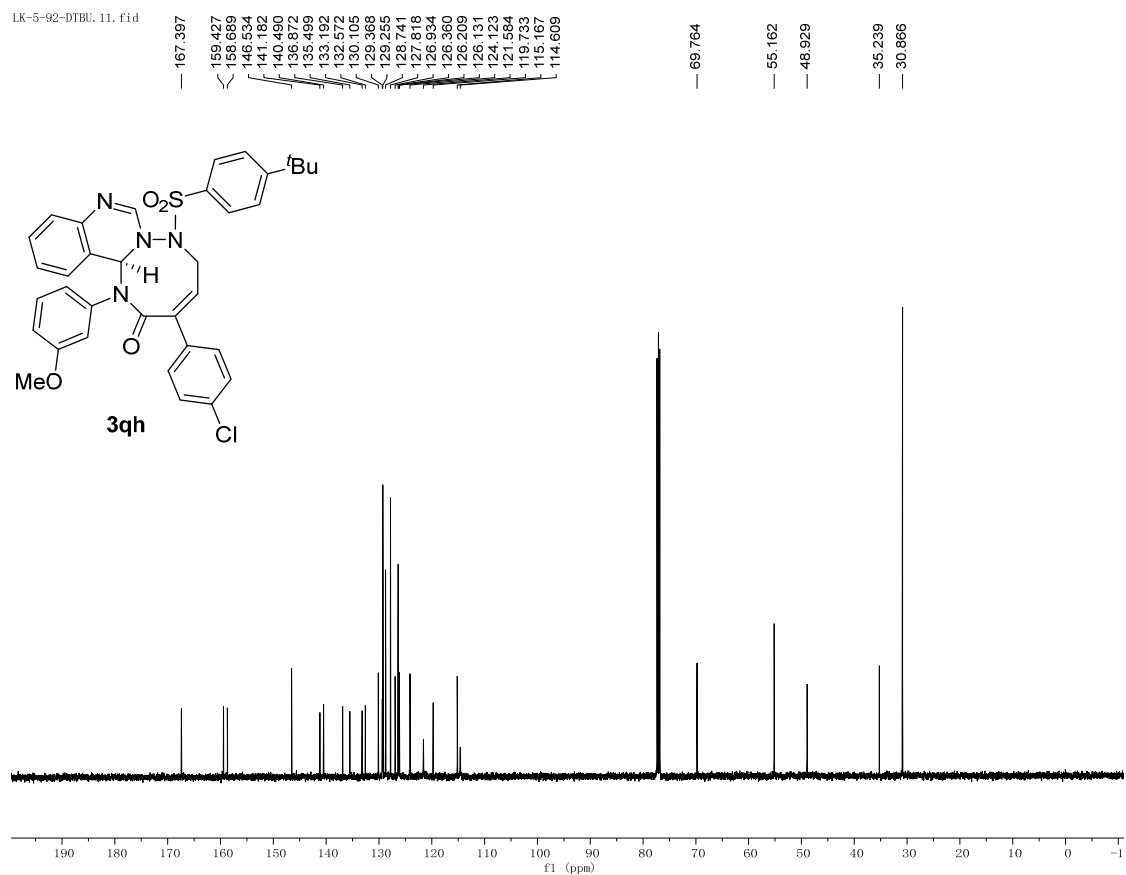

**<sup>1</sup>H NMR (500 MHz) and <sup>13</sup>C NMR (125 MHz) spectra of 3qh**

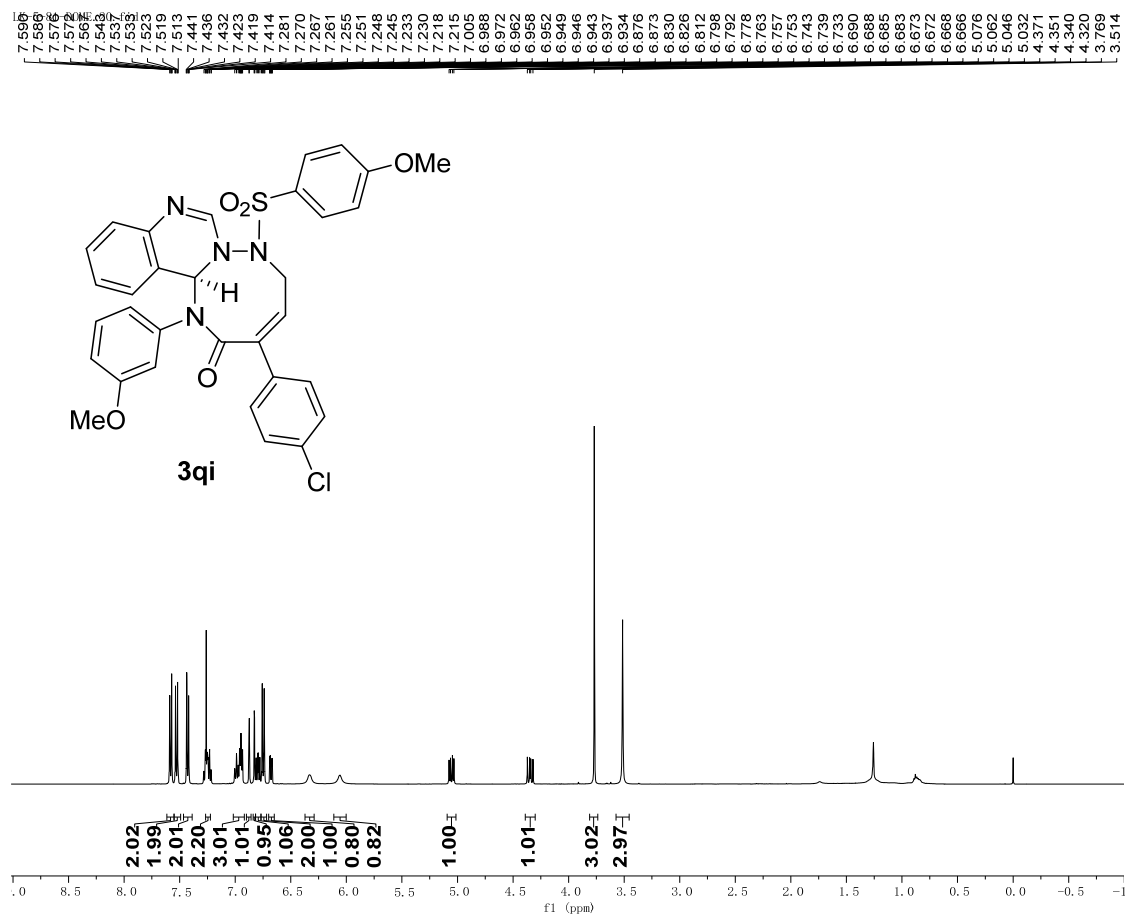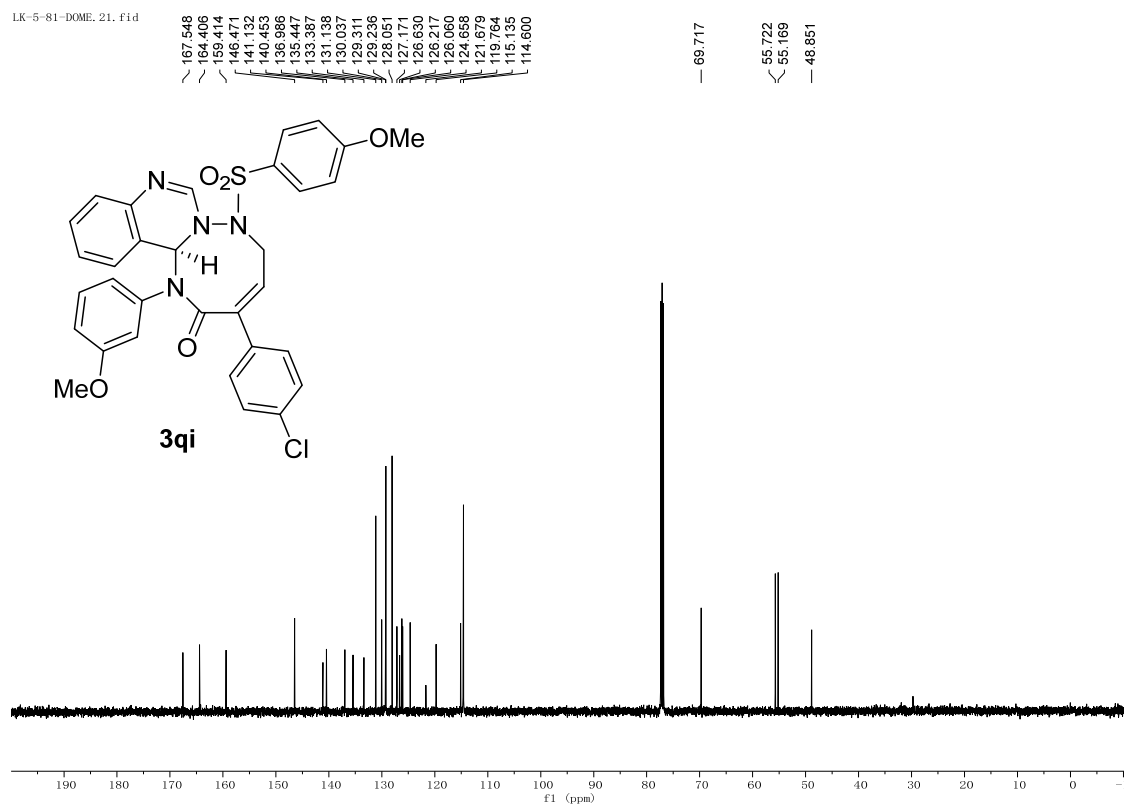

$^1\text{H}$  NMR (500 MHz) and  $^{13}\text{C}$  NMR (125 MHz) spectra of **3qi**

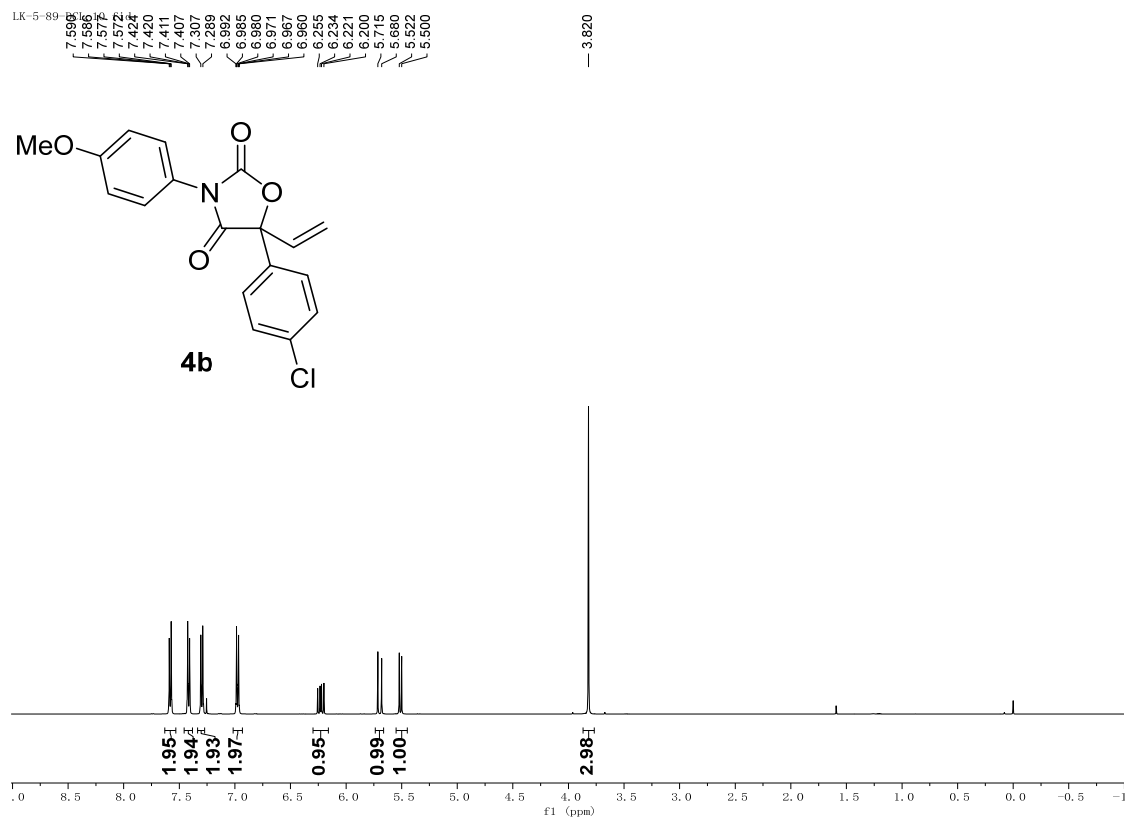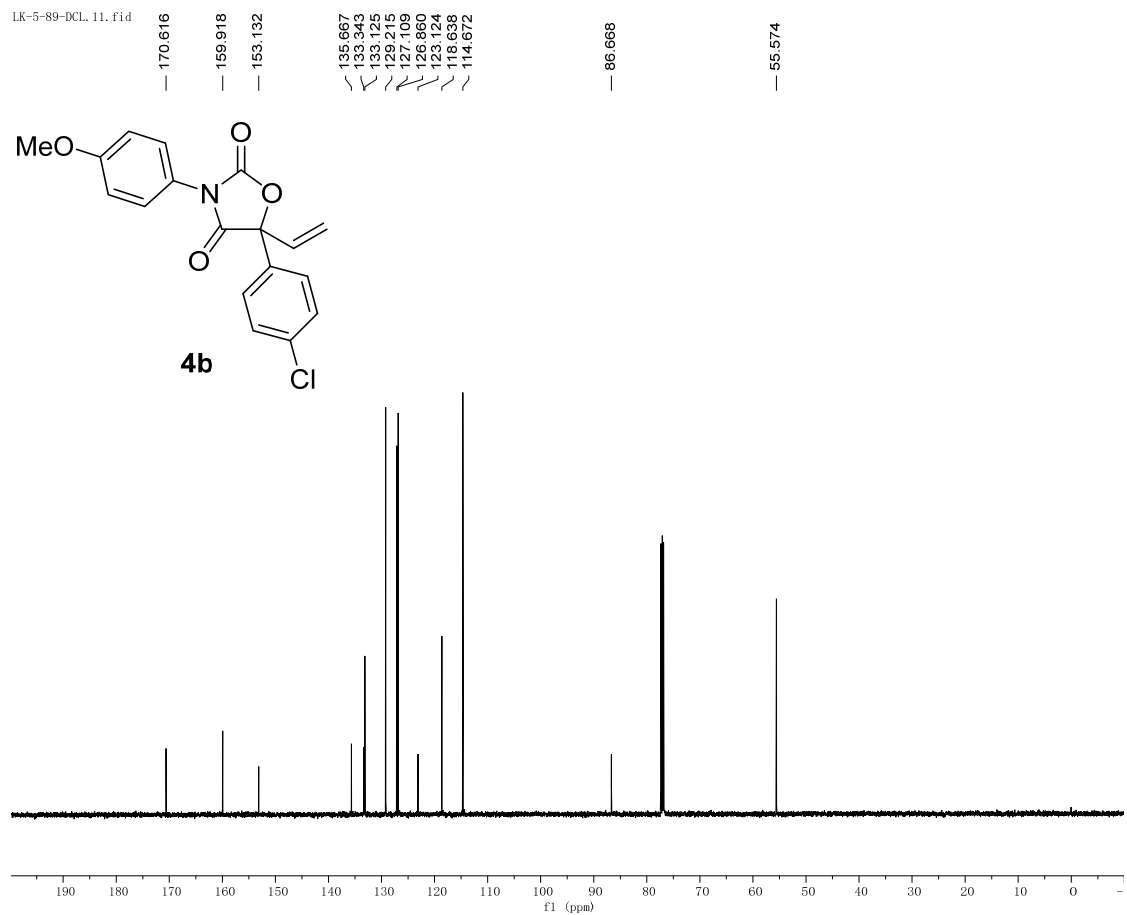

$^1\text{H}$  NMR (500 MHz) and  $^{13}\text{C}$  NMR (125 MHz) spectra of **4b**

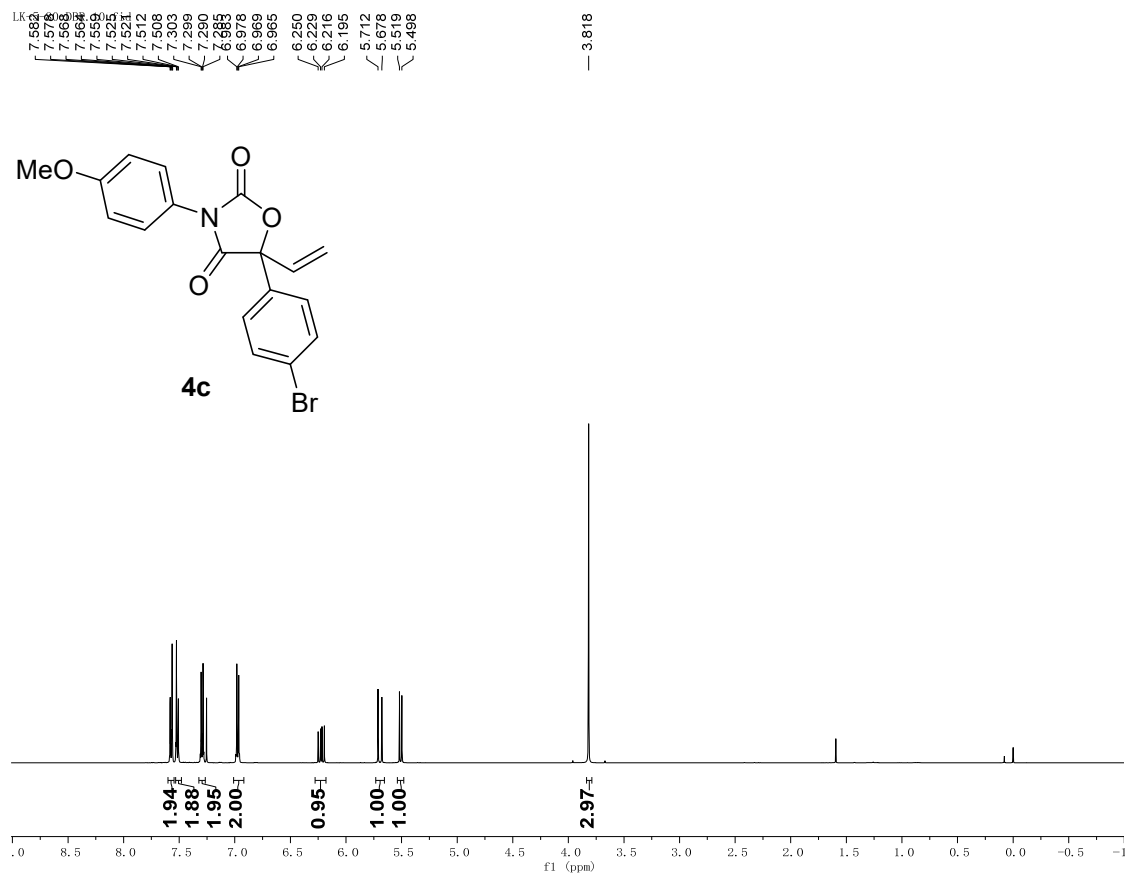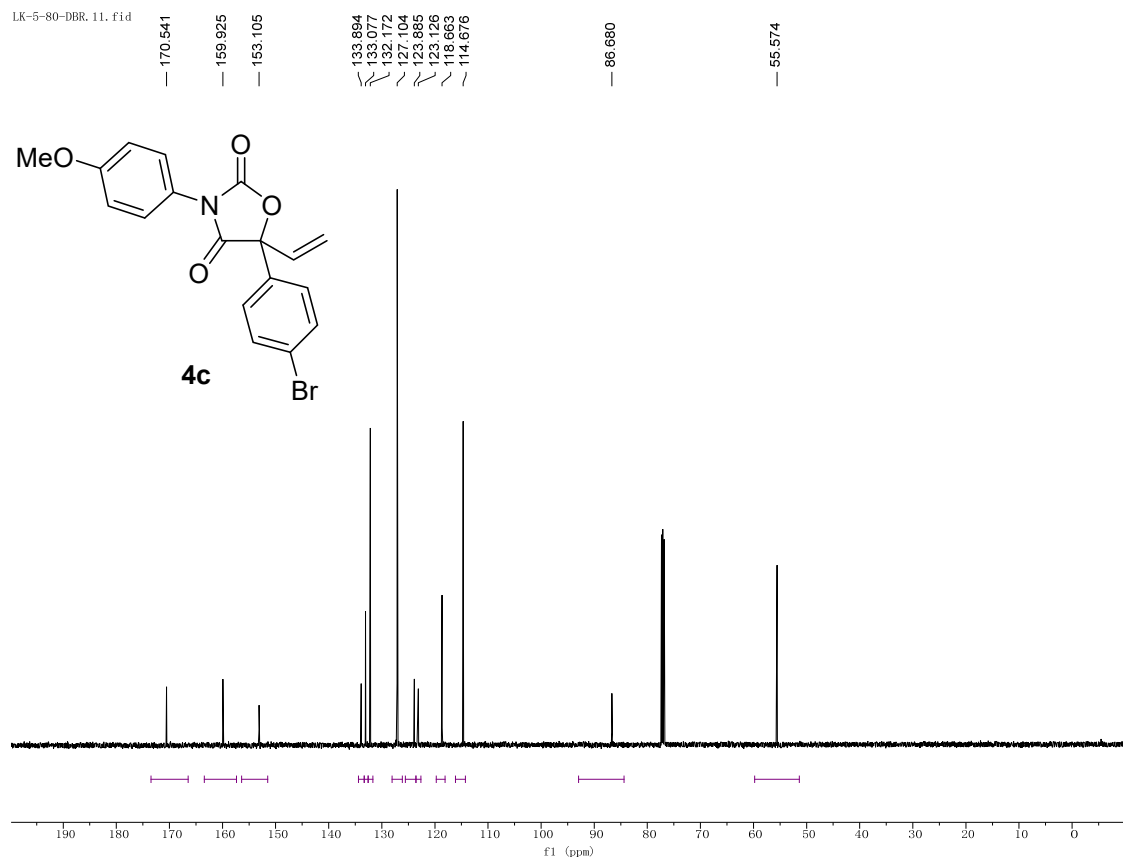

$^1\text{H}$  NMR (500 MHz) and  $^{13}\text{C}$  NMR (125 MHz) spectra of **4c**

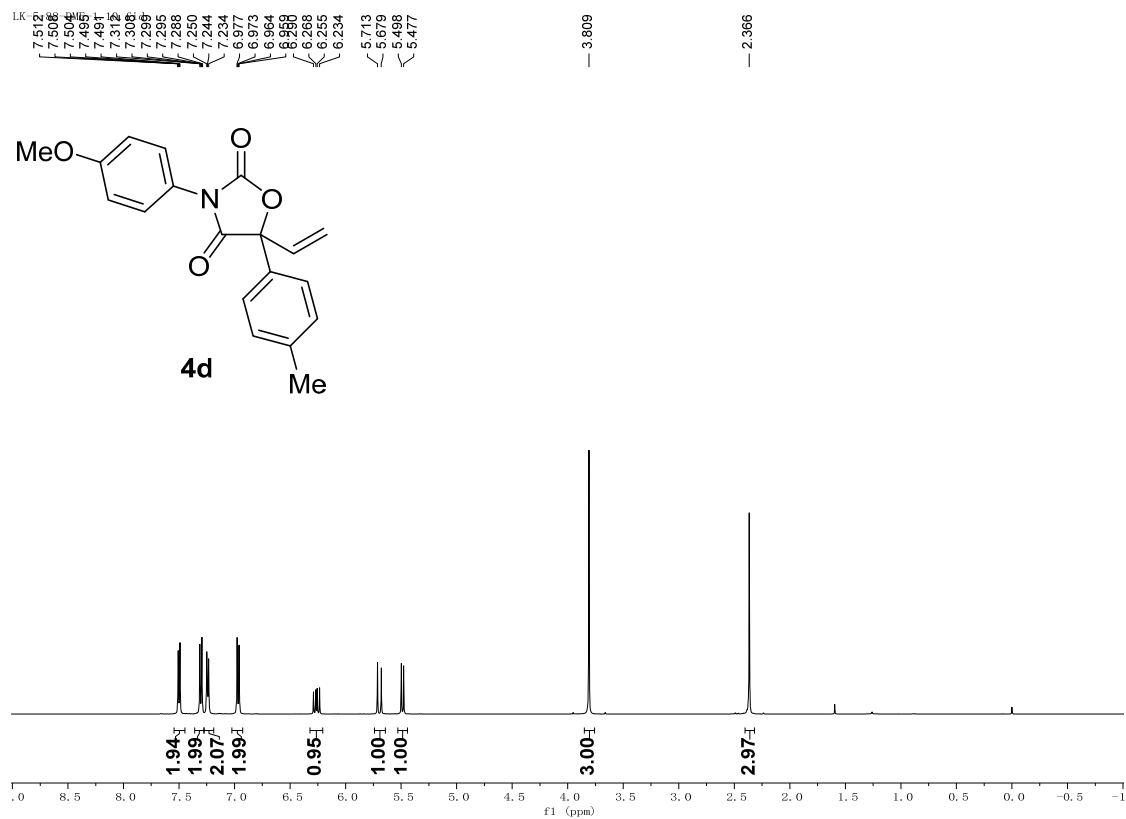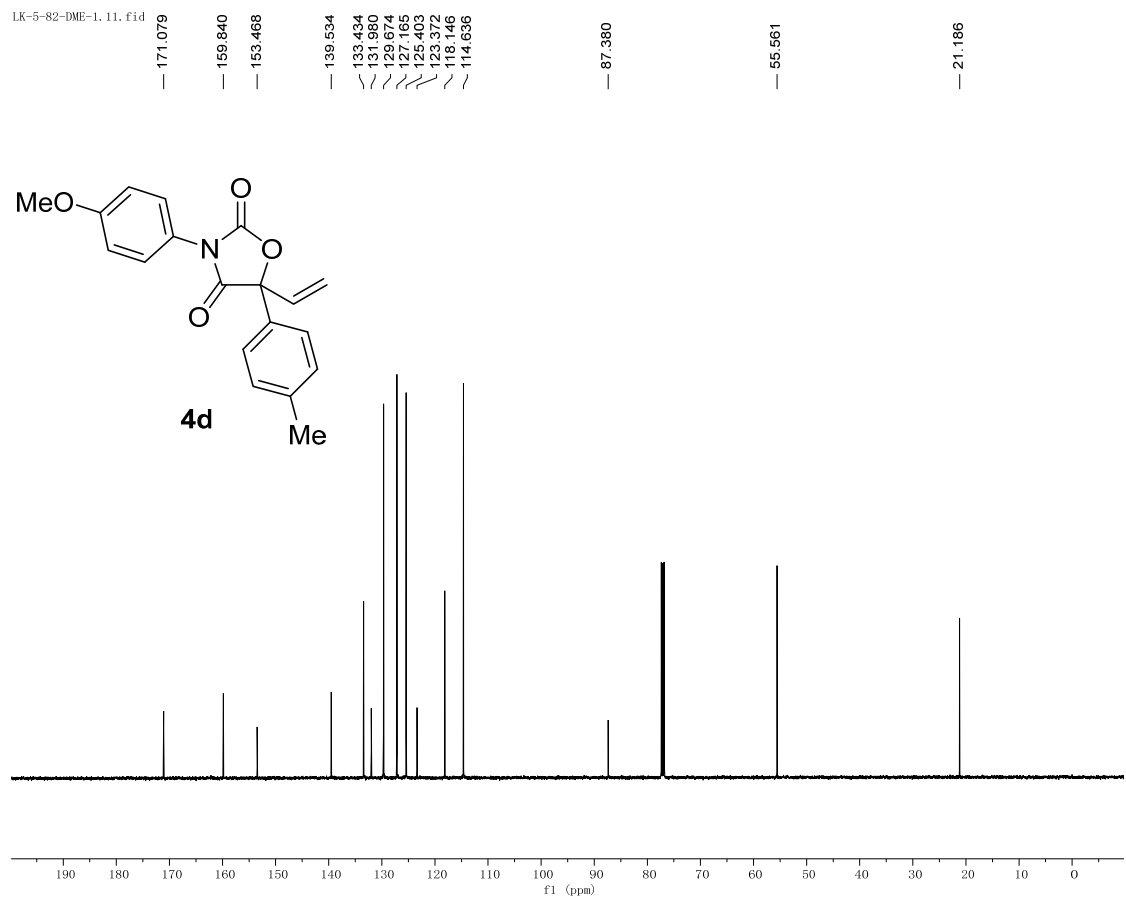

$^1\text{H}$  NMR (500 MHz) and  $^{13}\text{C}$  NMR (125 MHz) spectra of **4d**

8.134  
8.130  
7.912  
7.895  
7.885  
7.861  
7.877  
7.873  
7.866  
7.847  
7.841  
7.837  
7.833  
7.828  
7.768  
7.762  
7.692  
7.686  
7.694  
7.632  
7.632  
7.526  
7.520  
7.518  
7.514  
7.512  
7.507  
7.500  
7.498  
7.327  
7.322  
7.313  
7.309  
6.969  
6.964  
6.955  
6.950  
6.361  
6.359  
6.347  
6.325  
5.775  
5.741  
5.544  
5.522  
3.786

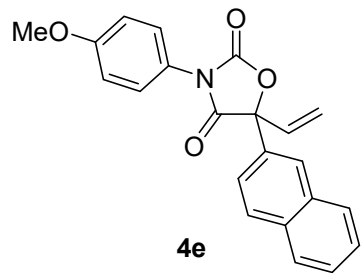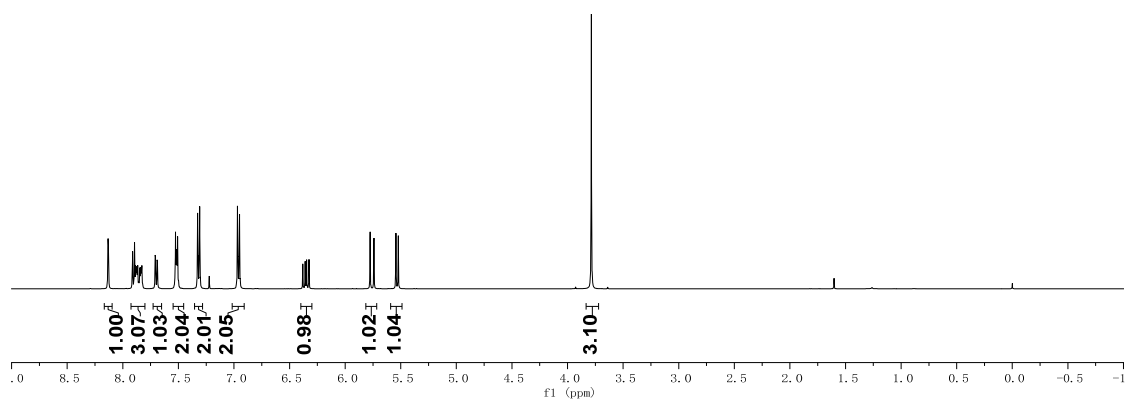

LK-5-83-2Nai.11.fid

170.949  
159.898  
153.468  
133.437  
133.389  
132.900  
132.117  
129.099  
128.554  
127.758  
127.229  
127.216  
126.910  
124.819  
123.333  
122.756  
118.631  
114.679  
87.489  
55.573

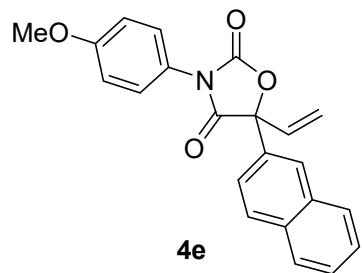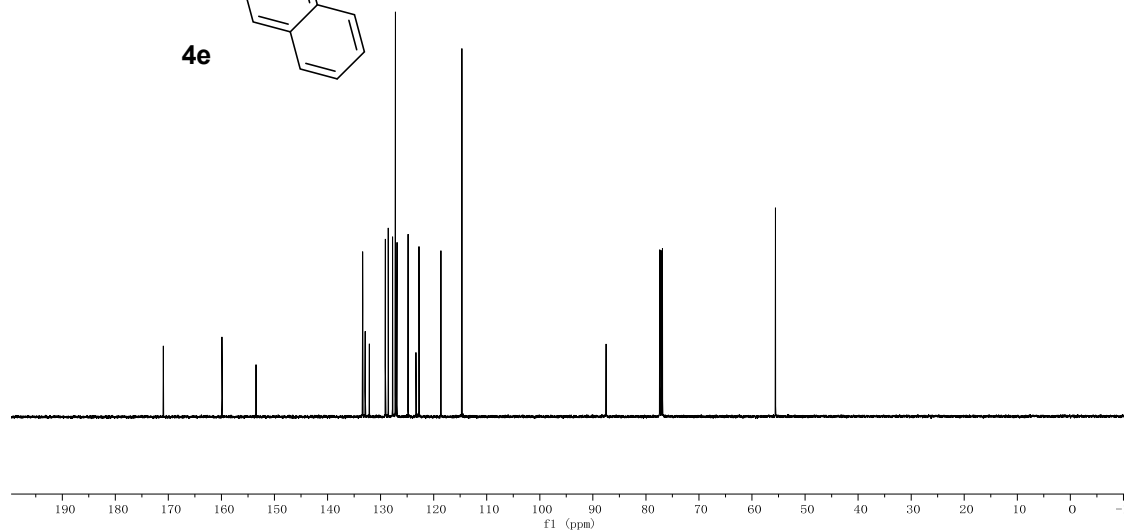

<sup>1</sup>H NMR (500 MHz) and <sup>13</sup>C NMR (125 MHz) spectra of **4e**

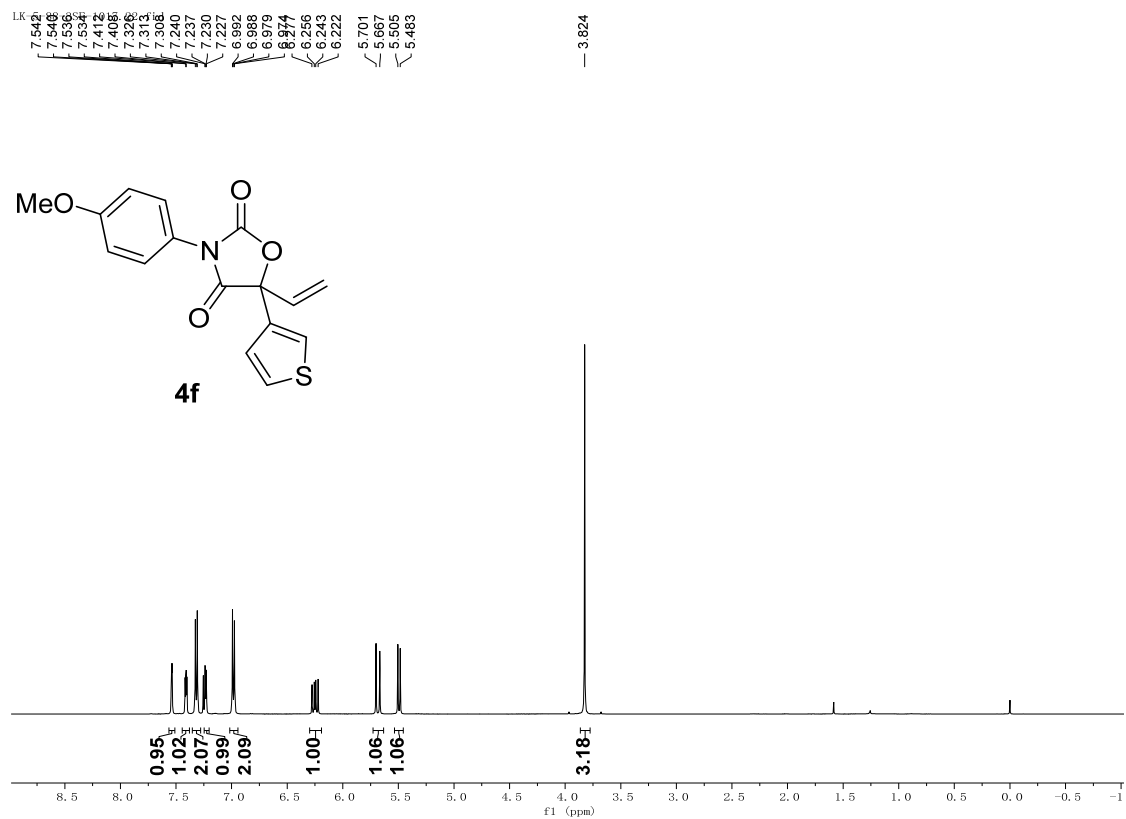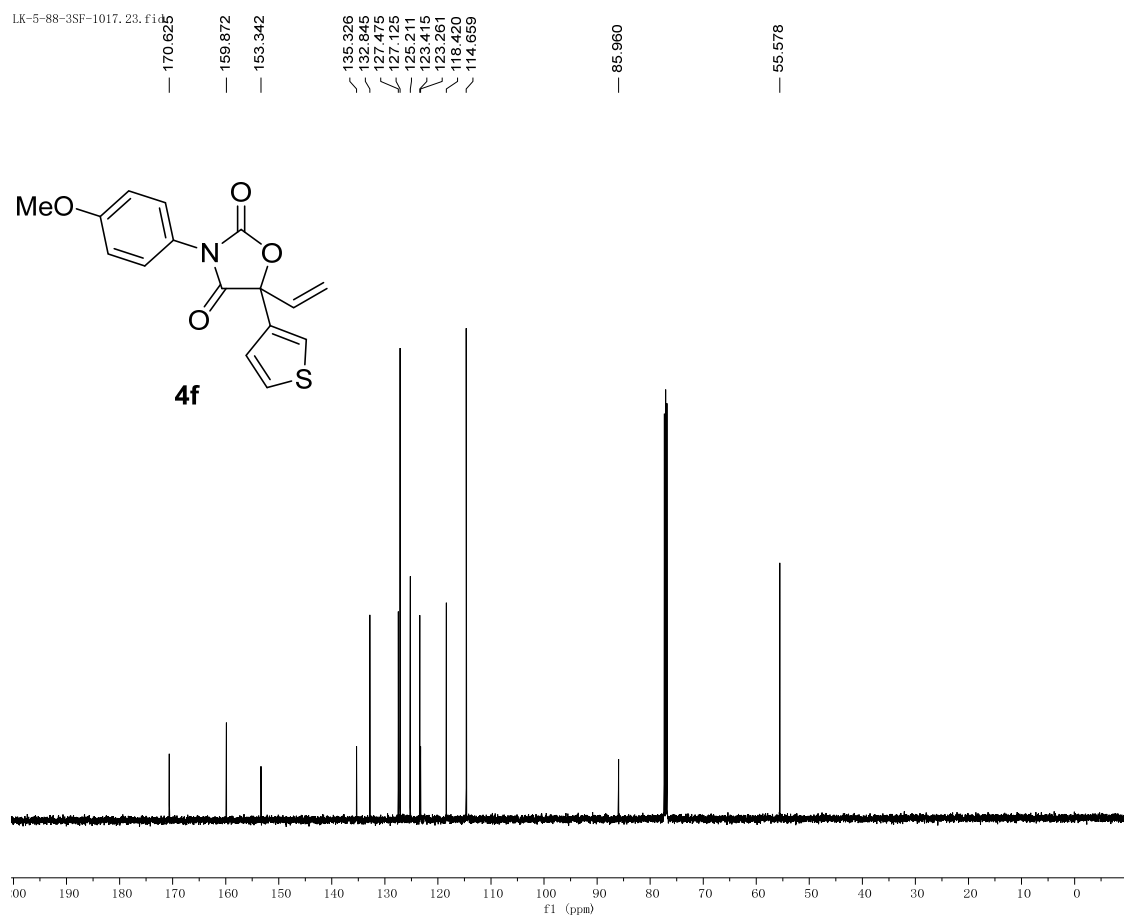

$^1\text{H}$  NMR (500 MHz) and  $^{13}\text{C}$  NMR (125 MHz) spectra of **4f**



7.476  
7.472  
7.468  
7.459  
7.455  
7.442  
7.435  
7.426  
7.377  
7.375  
7.362  
7.356  
7.349  
7.343  
7.327  
7.314  
7.312  
7.288  
7.284  
7.280  
7.219  
7.214  
7.206  
7.201  
7.187  
6.997  
6.990  
6.986  
6.947  
6.842  
6.834  
6.562  
6.540  
6.527  
6.505  
5.771  
5.753  
5.750  
5.747  
5.717  
5.273  
3.756

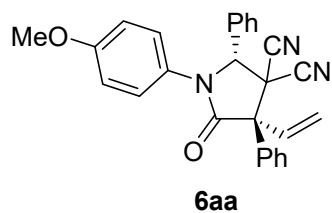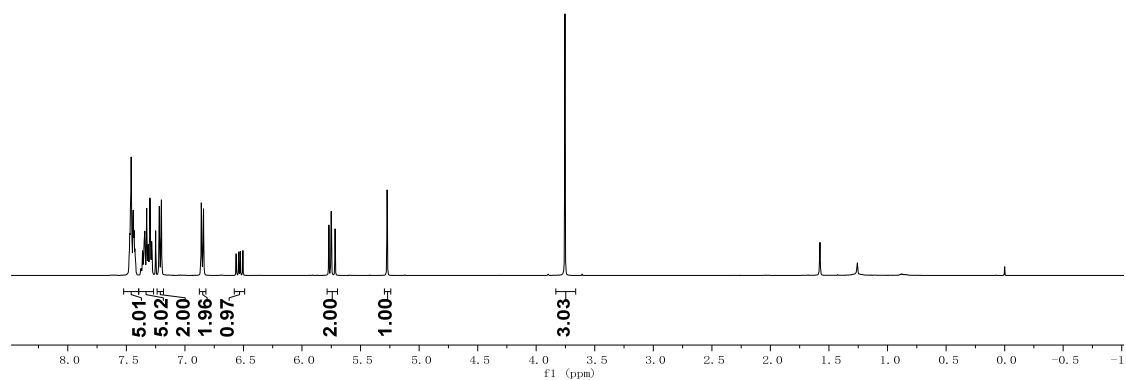

LK-5-35-DOME.11.fid

169.749  
158.133  
133.714  
133.114  
130.344  
130.136  
129.821  
129.336  
128.960  
128.651  
128.667  
128.382  
125.069  
122.066  
117.898  
112.826  
111.814  
65.843  
62.832  
55.443  
50.526

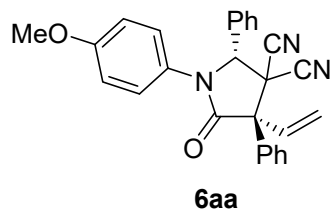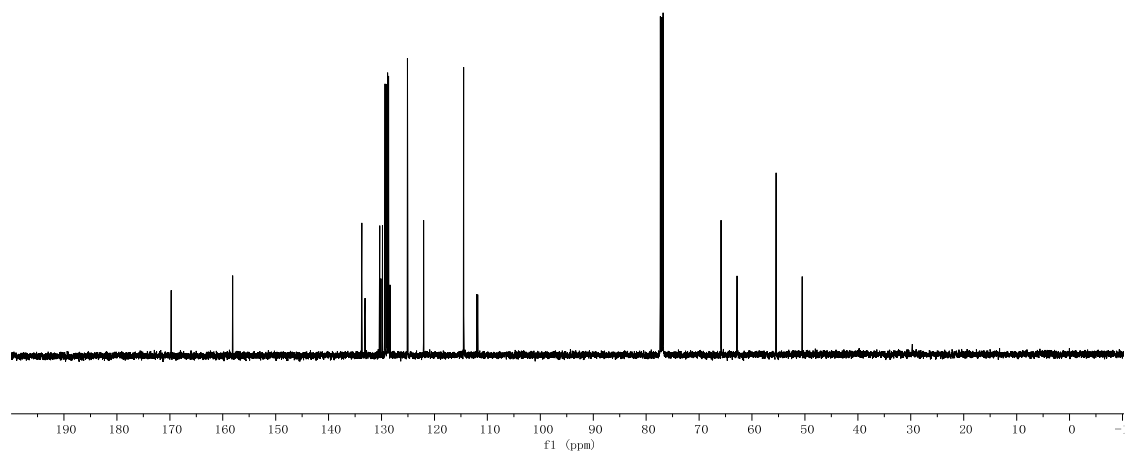

$^1\text{H}$  NMR (500 MHz) and  $^{13}\text{C}$  NMR (125 MHz) spectra of **6aa**

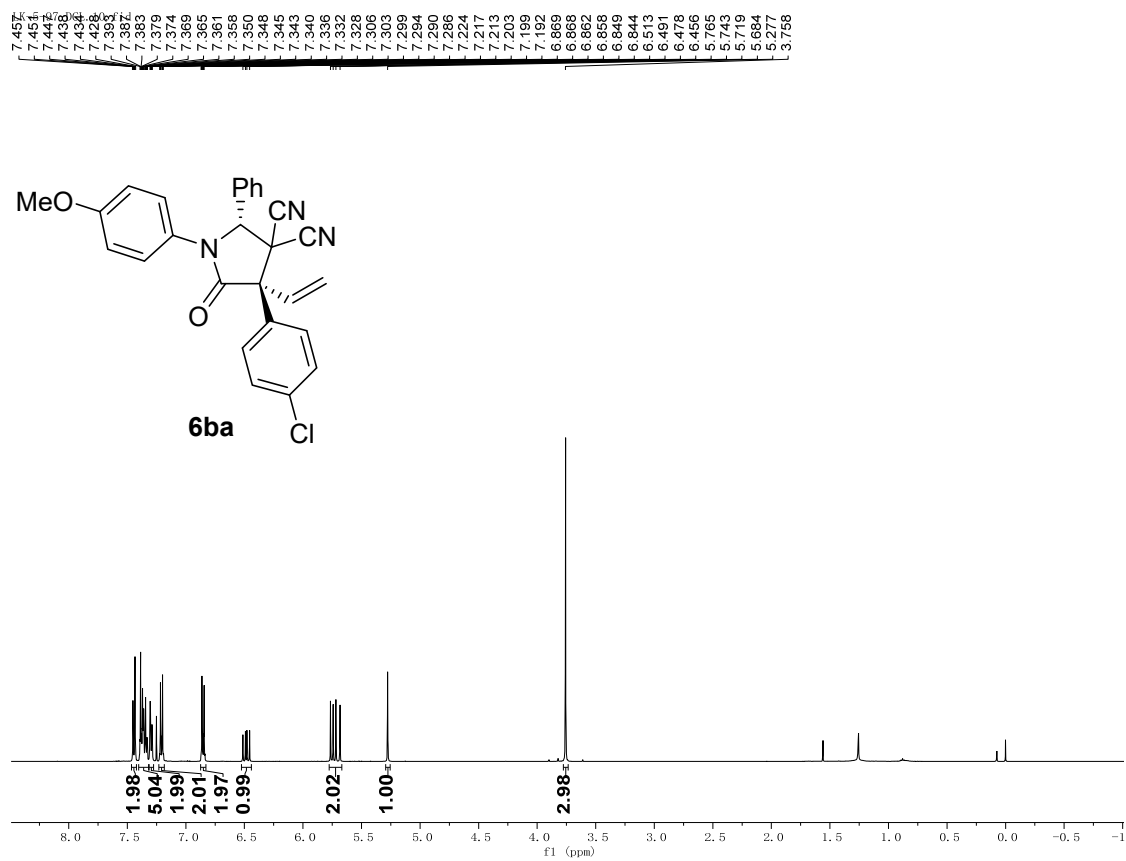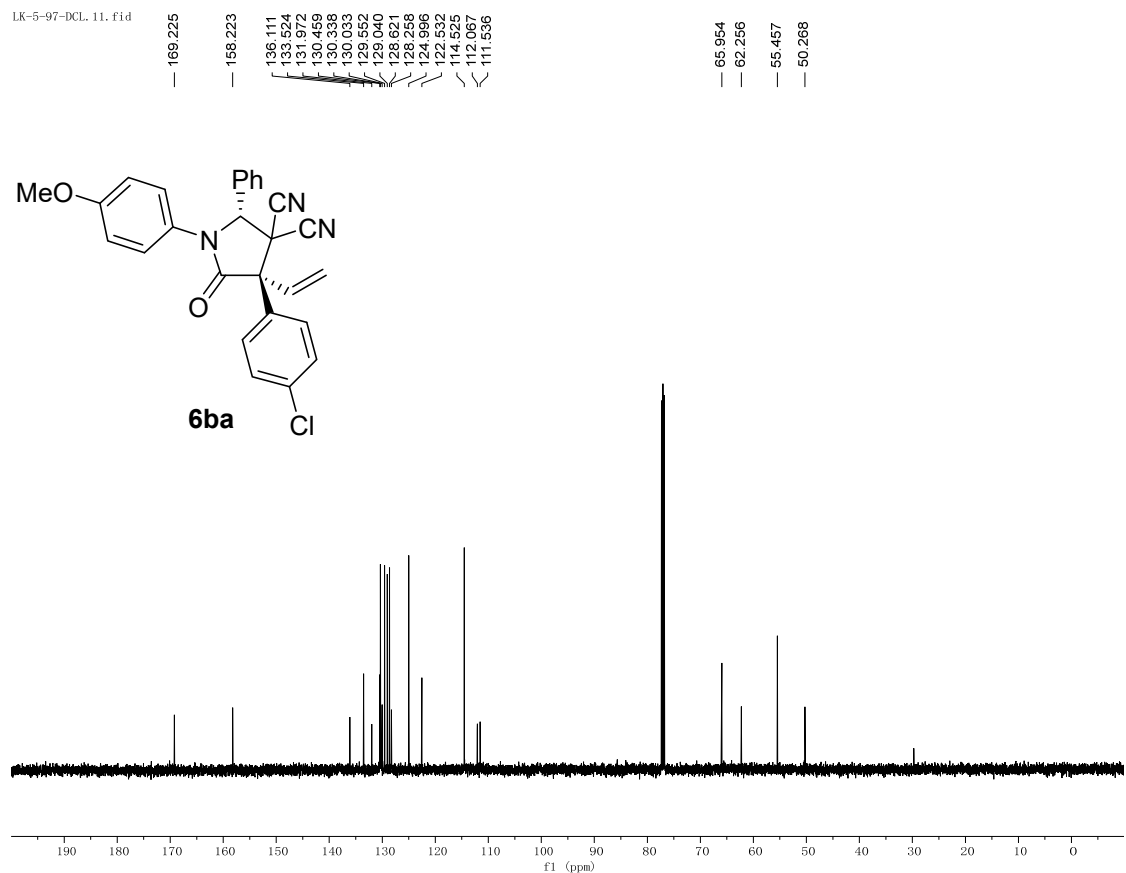

<sup>1</sup>H NMR (500 MHz) and <sup>13</sup>C NMR (125 MHz) spectra of **6ba**

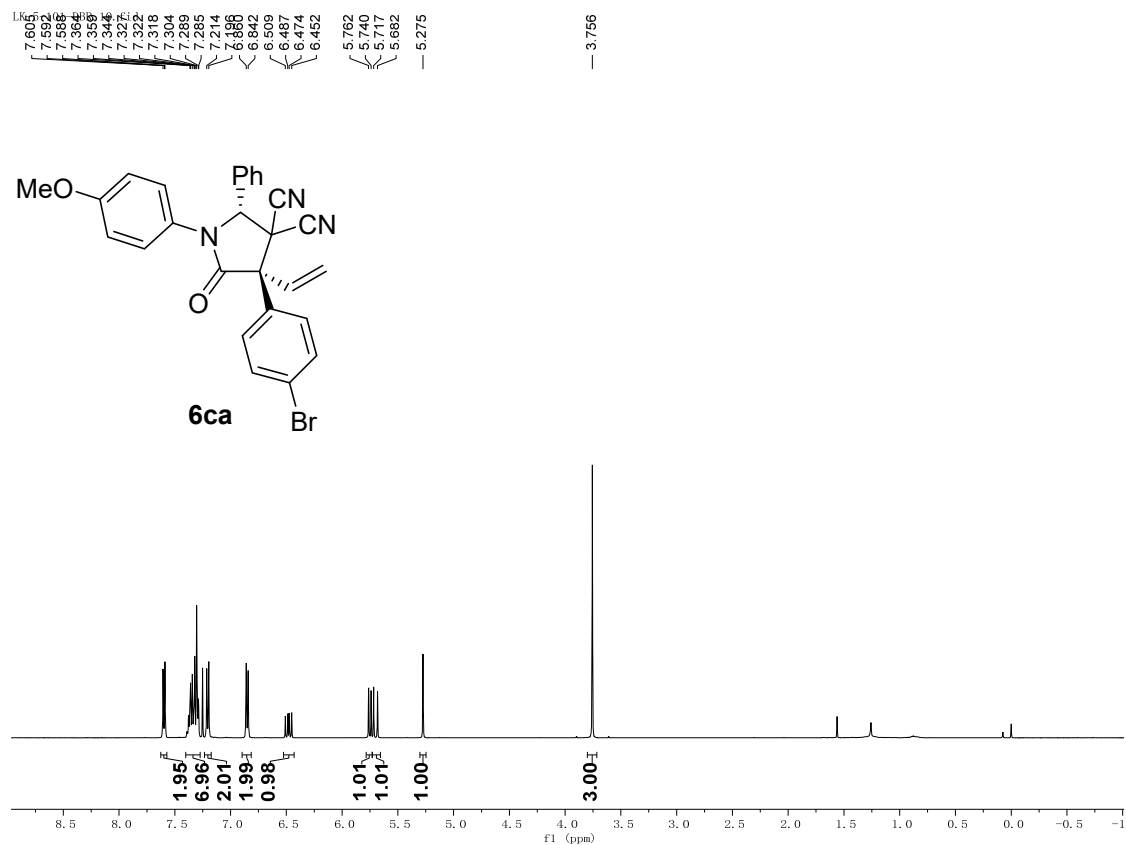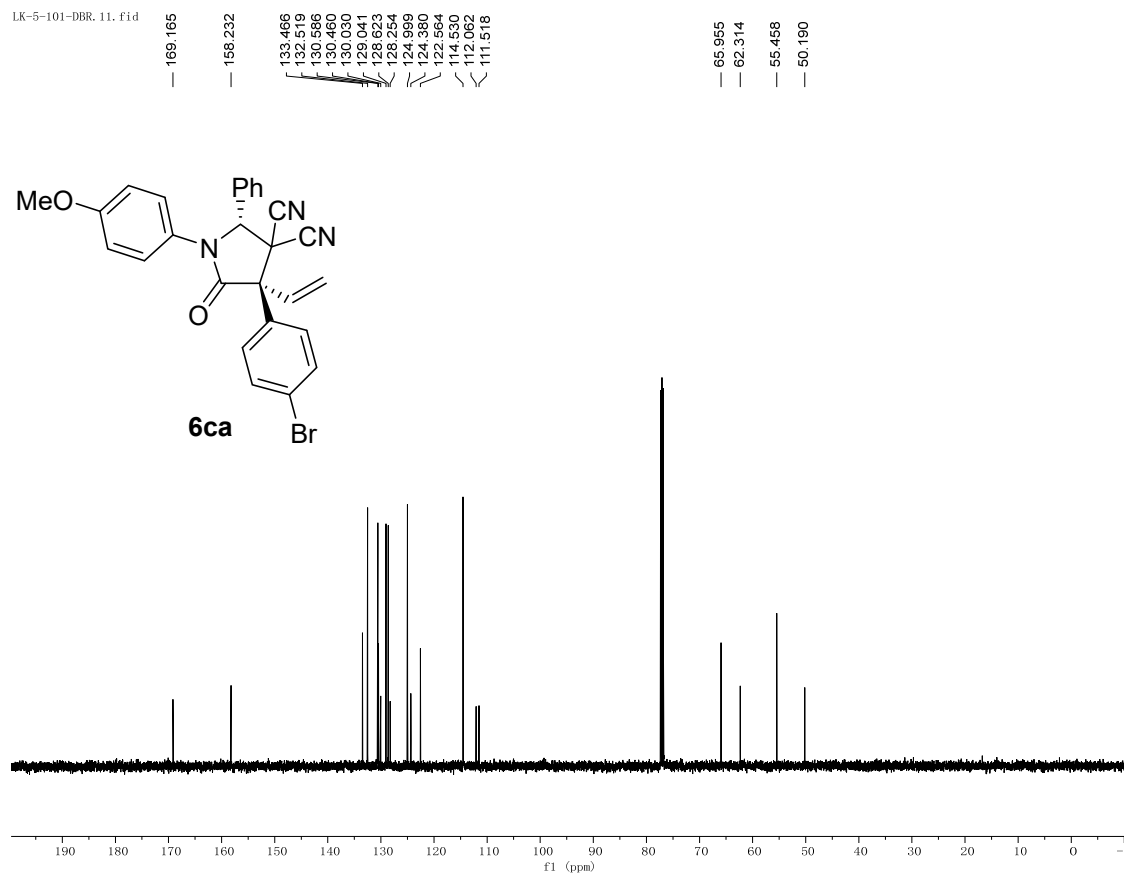

$^1\text{H}$  NMR (500 MHz) and  $^{13}\text{C}$  NMR (125 MHz) spectra of **6ca**

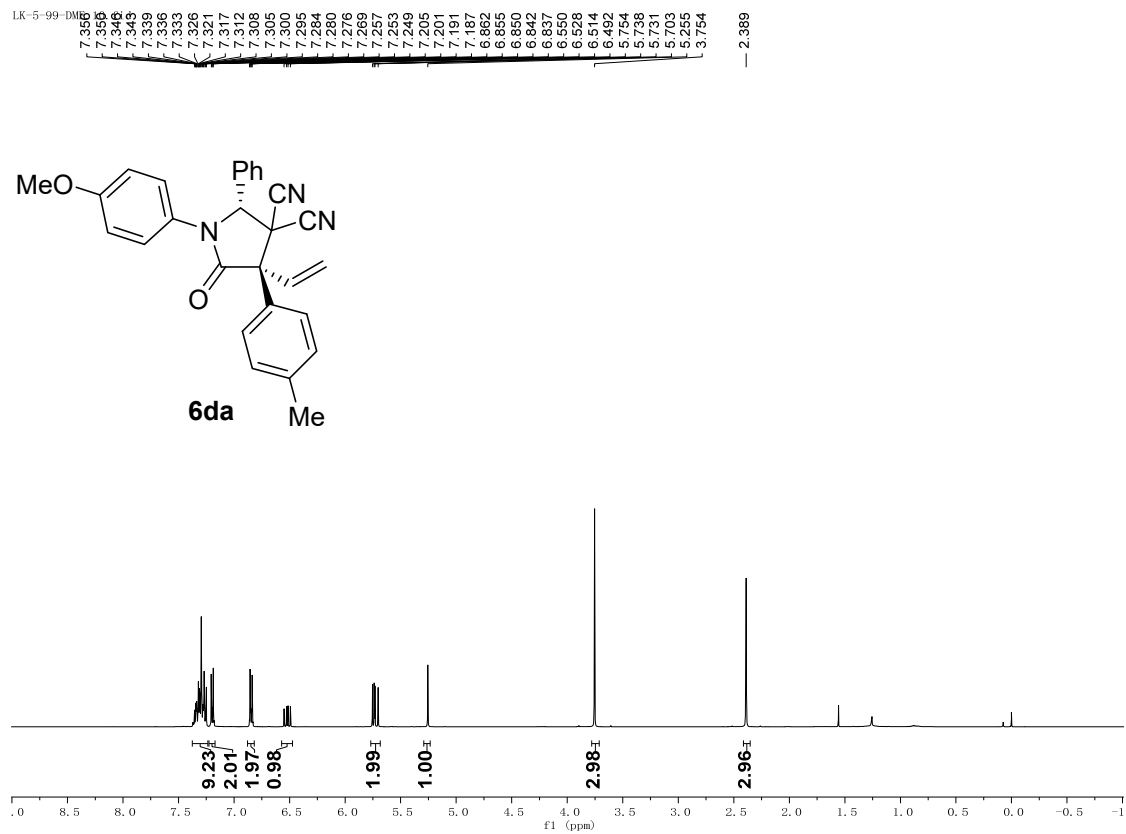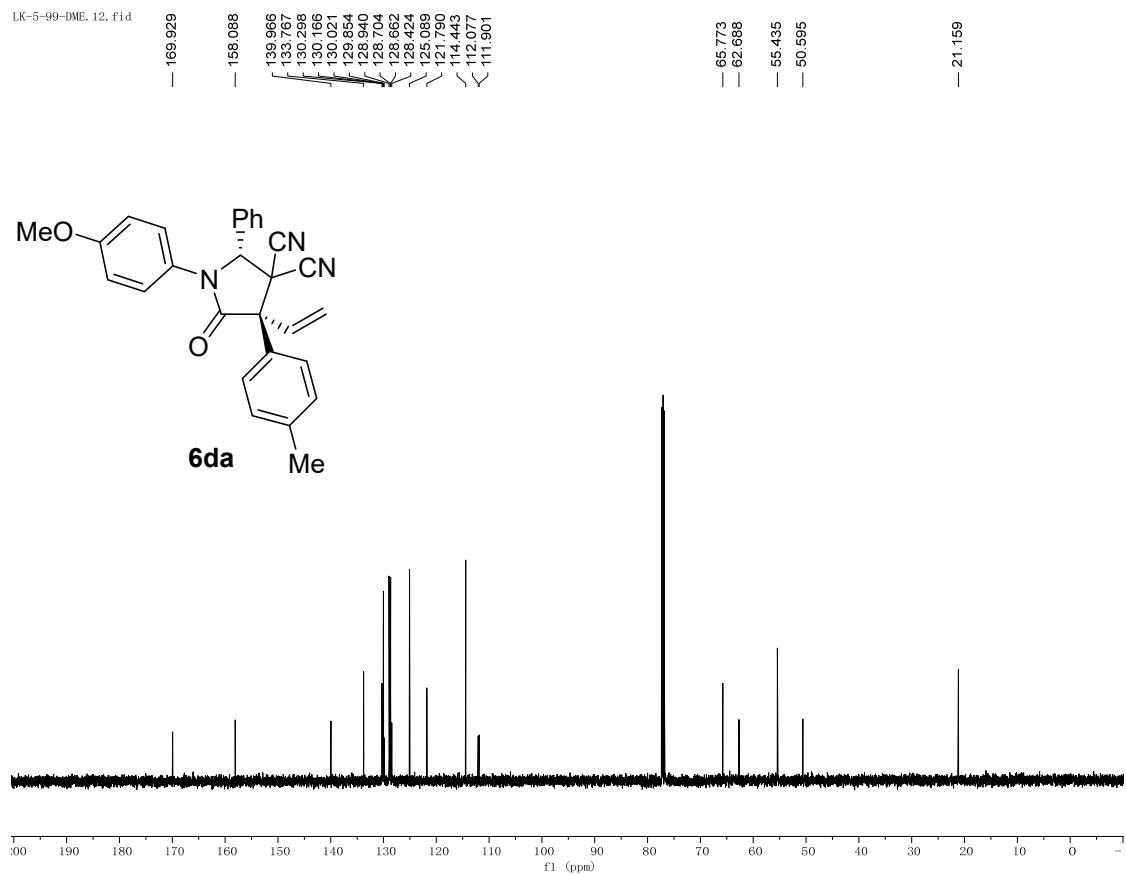

$^1\text{H}$  NMR (500 MHz) and  $^{13}\text{C}$  NMR (125 MHz) spectra of **6da**

7.969  
7.951  
7.892  
7.876  
7.833  
7.829  
7.809  
7.784  
7.760  
7.606  
7.583  
7.588  
7.585  
7.582  
7.570  
7.568  
7.544  
7.544  
7.538  
7.535  
7.524  
7.521  
7.519  
7.519  
7.508  
7.505  
7.369  
7.356  
7.350  
7.346  
7.342  
7.338  
7.335  
7.324  
7.320  
7.311  
7.307  
7.303  
7.292  
7.289  
7.286  
7.281  
7.276  
7.272  
7.260  
7.253  
7.246  
7.238  
7.236  
7.227  
6.882  
6.878  
6.869  
6.865  
6.839  
6.617  
6.604  
6.582  
5.816  
5.794  
5.785  
5.750  
5.326  
3.764

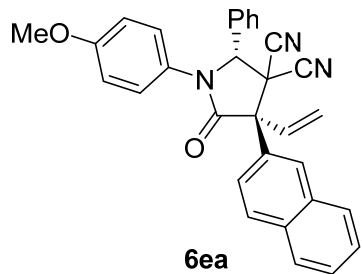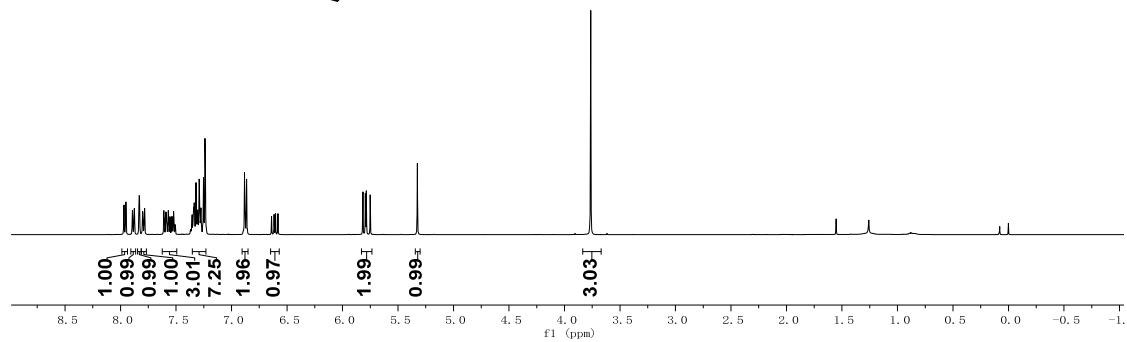

LK-5-100-NAL.11.f1d

169.804  
158.219  
133.672  
133.434  
132.959  
130.364  
130.319  
130.127  
129.224  
128.985  
128.693  
128.652  
128.465  
127.715  
127.686  
127.005  
123.772  
123.175  
114.589  
112.079  
111.868

65.946  
63.109  
55.467  
50.463

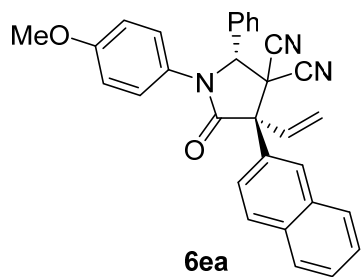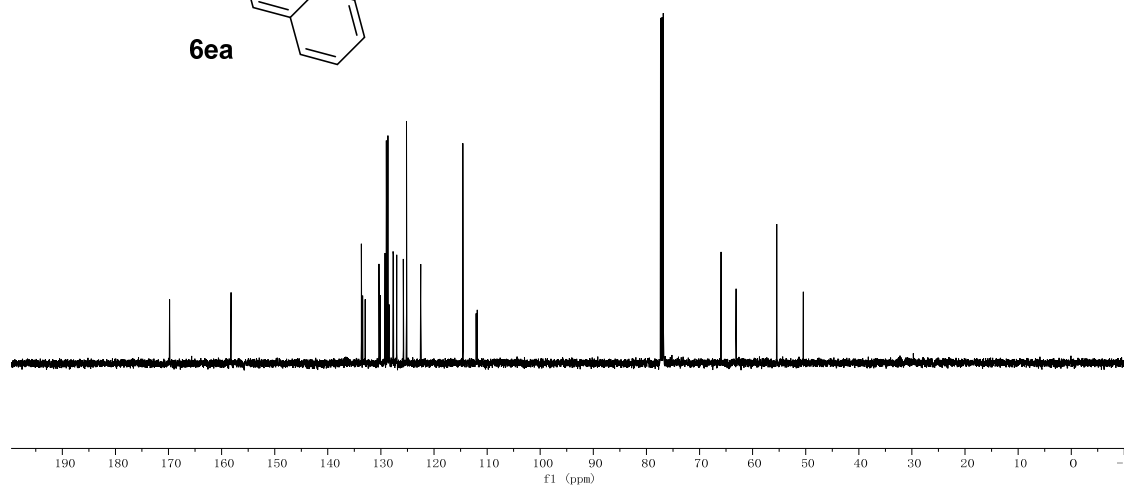

$^1\text{H}$  NMR (500 MHz) and  $^{13}\text{C}$  NMR (125 MHz) spectra of **6ea**

LK-5-98  
 7.476  
 7.470  
 7.465  
 7.459  
 7.371  
 7.363  
 7.360  
 7.357  
 7.354  
 7.345  
 7.341  
 7.333  
 7.329  
 7.323  
 7.320  
 7.312  
 7.307  
 7.303  
 7.214  
 7.207  
 7.203  
 7.196  
 7.194  
 7.189  
 7.186  
 7.183  
 6.858  
 6.851  
 6.846  
 6.837  
 6.833  
 6.826  
 6.513  
 6.491  
 6.478  
 6.456  
 5.733  
 5.721  
 5.711  
 5.688  
 5.342  
 3.750

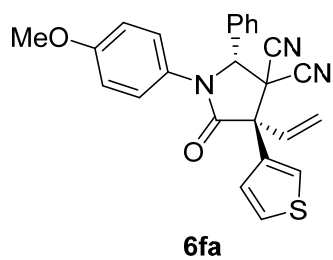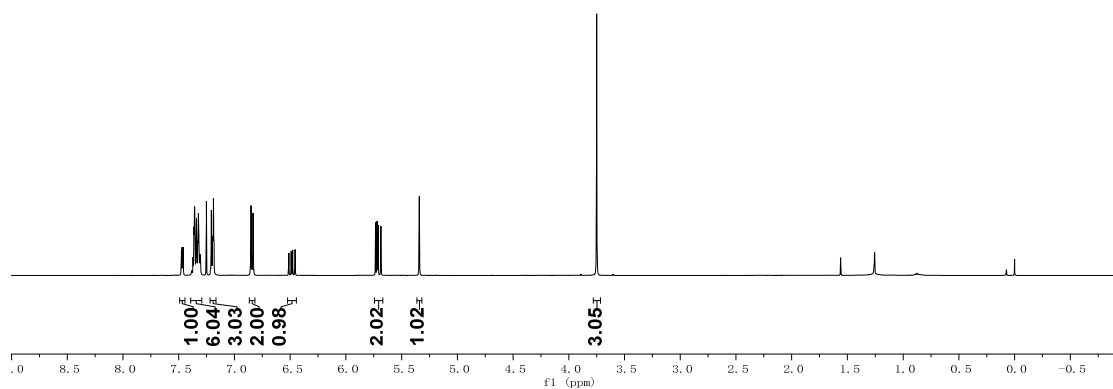

LK-5-98-SF. 11. fid

169.453  
 158.142  
 133.269  
 133.106  
 130.371  
 130.230  
 129.021  
 128.573  
 128.490  
 127.532  
 127.286  
 126.588  
 125.072  
 117.183  
 117.173  
 111.612  
 66.040  
 60.151  
 55.443  
 50.228

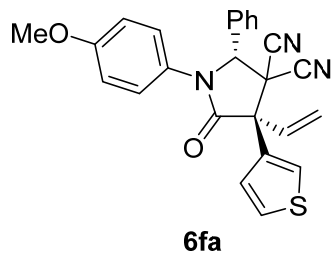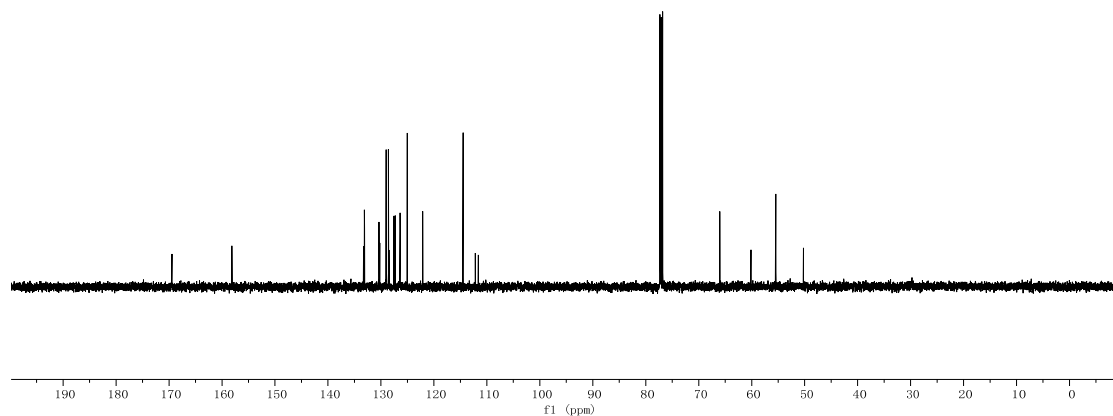

$^1\text{H}$  NMR (500 MHz) and  $^{13}\text{C}$  NMR (125 MHz) spectra of **6fa**

1k-5-106  
 7.477  
 7.470  
 7.464  
 7.431  
 7.409  
 7.403  
 7.422  
 7.418  
 7.414  
 7.412  
 7.409  
 7.387  
 7.387  
 7.383  
 7.280  
 7.269  
 7.196  
 7.189  
 7.185  
 7.176  
 7.171  
 7.164  
 7.040  
 7.036  
 7.023  
 7.020  
 7.008  
 6.880  
 6.873  
 6.869  
 6.855  
 6.854  
 6.542  
 6.528  
 6.506  
 5.786  
 5.764  
 5.759  
 5.723  
 5.247  
 3.770

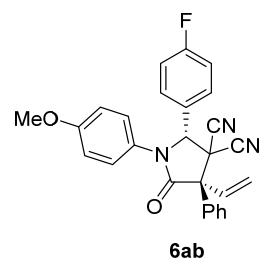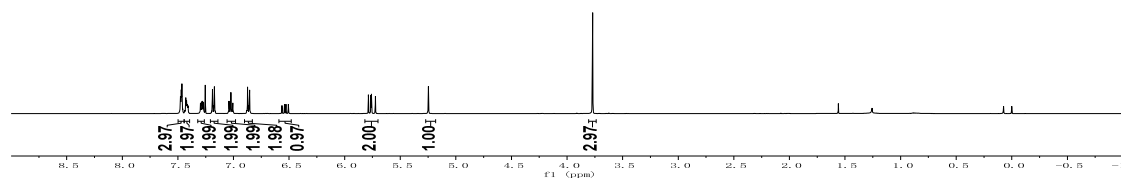

1k-5-106-df. 11. f1.d

169.882  
 164.671  
 162.676  
 158.245  
 133.568  
 132.720  
 130.674  
 130.673  
 129.972  
 129.395  
 128.737  
 128.084  
 125.877  
 125.853  
 125.143  
 122.035  
 118.358  
 116.182  
 114.552  
 111.832  
 111.792  
 65.176  
 62.816  
 55.461  
 50.525

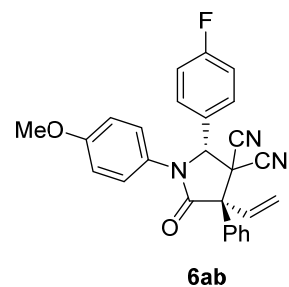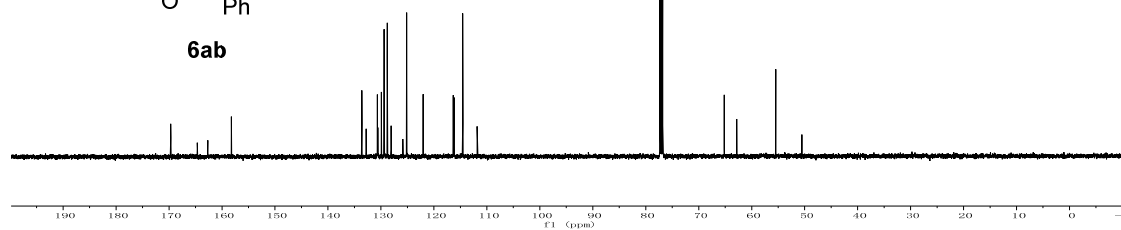

1k-5-106-df. 12. f1.d

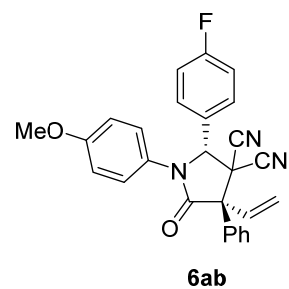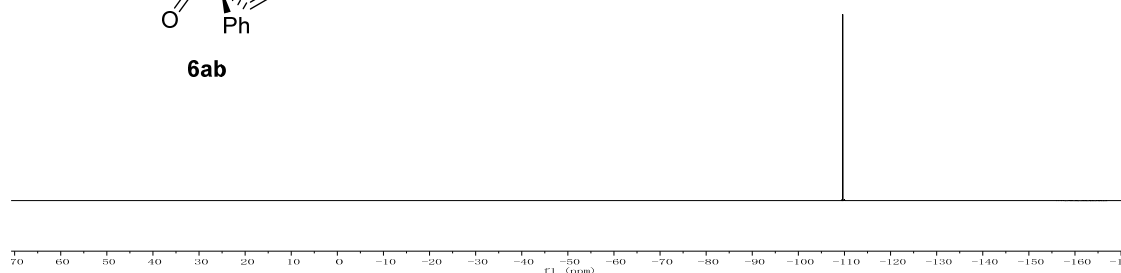

<sup>1</sup>H NMR (500 MHz), <sup>13</sup>C NMR (125 MHz) and <sup>19</sup>F NMR (470 MHz) spectra of **6ab**

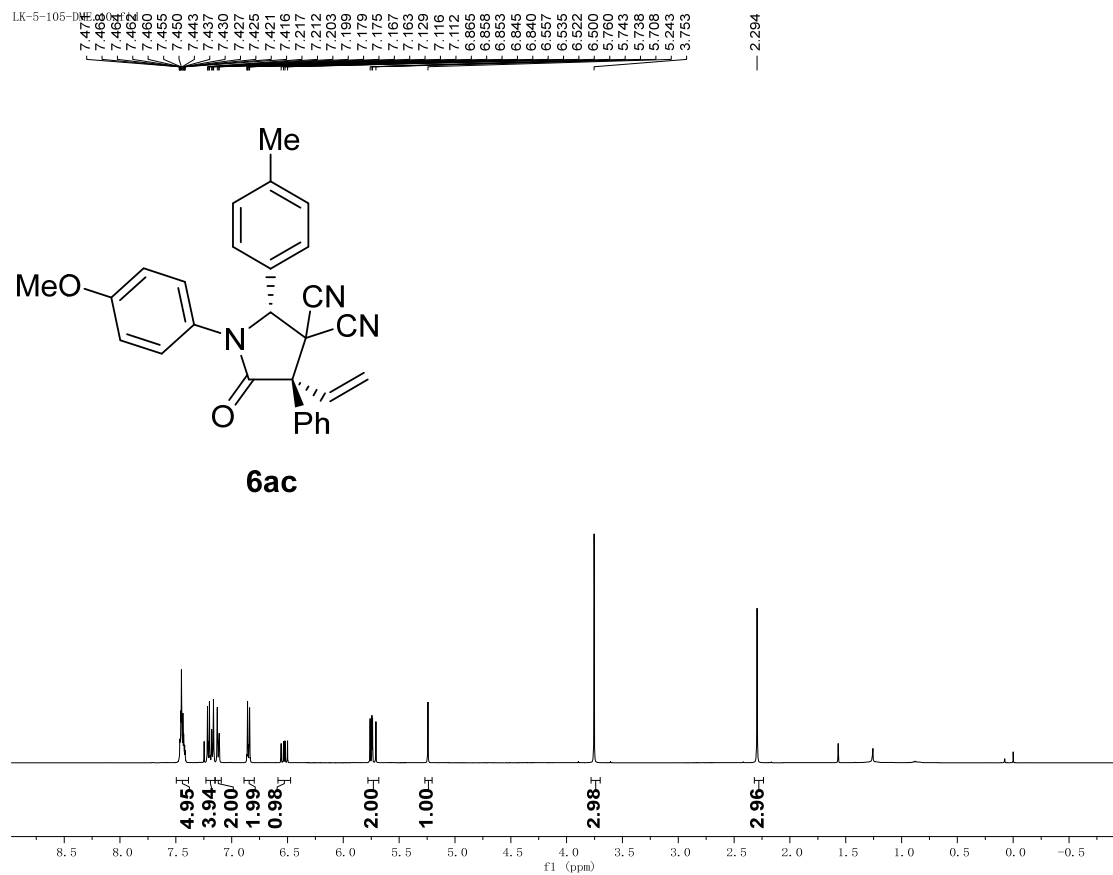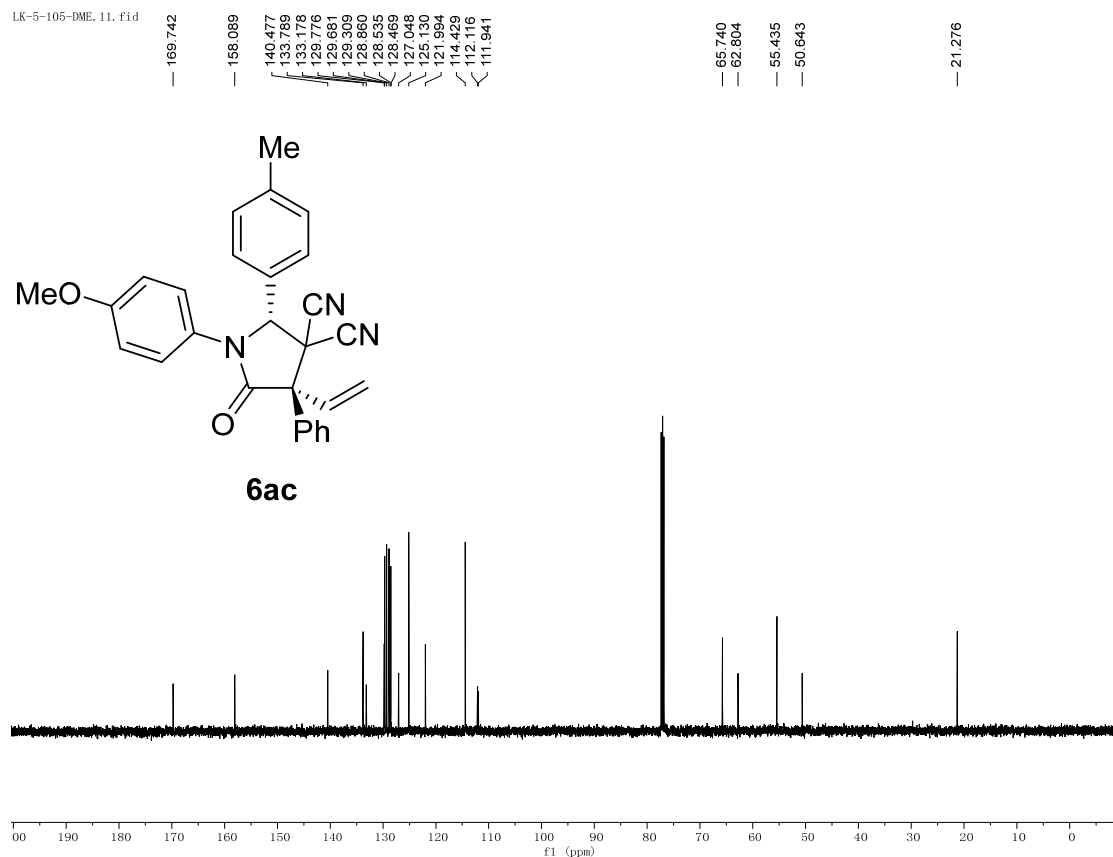

<sup>1</sup>H NMR (500 MHz) and <sup>13</sup>C NMR (125 MHz) spectra of **6ac**



7.522  
7.519  
7.515  
7.513  
7.510  
7.508  
7.502  
7.499  
7.493  
7.486  
7.483  
7.479  
7.475  
7.468  
7.461  
7.456  
7.452  
7.450  
7.446  
7.443  
7.443  
7.228  
7.221  
7.217  
7.208  
7.204  
7.197  
6.911  
6.904  
6.899  
6.890  
6.886  
6.879  
6.592  
6.571  
6.558  
6.536  
6.475  
6.468  
6.366  
6.362  
6.359  
6.355  
5.734  
5.712  
5.691  
5.466  
5.456  
3.788

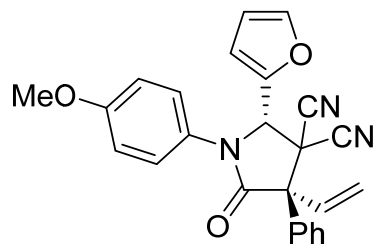

**6ad**

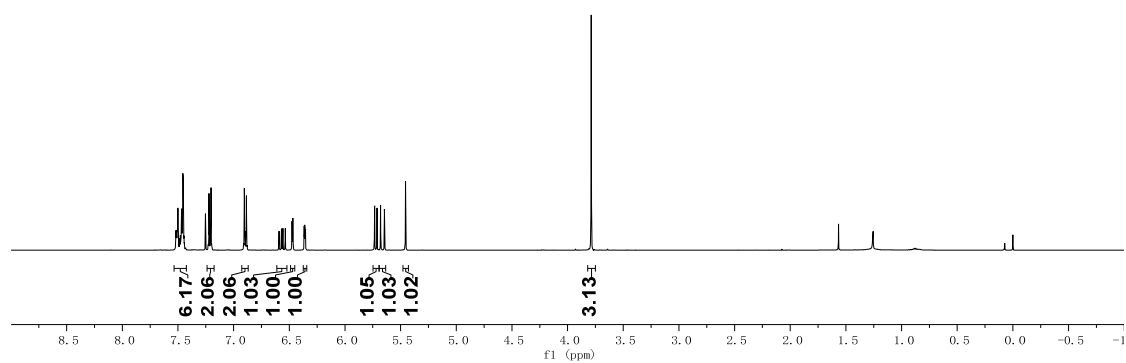

LK-5-107-2FN, 11, fid

168.550  
158.820  
144.759  
143.964  
134.076  
129.691  
129.264  
128.698  
128.212  
125.957  
122.451  
114.605  
113.836  
112.340  
111.562  
111.297  
62.207  
61.620  
55.493  
48.531

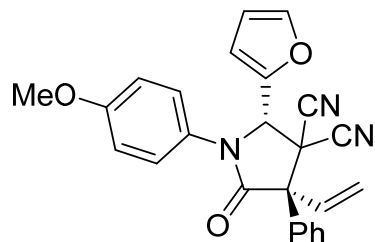

**6ad**

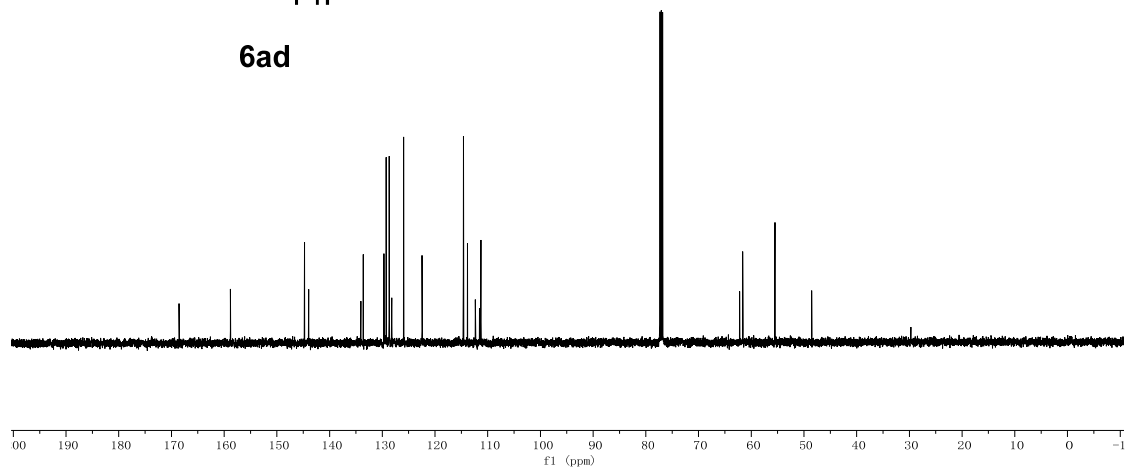

<sup>1</sup>H NMR (500 MHz) and <sup>13</sup>C NMR (125 MHz) spectra of **6ad**

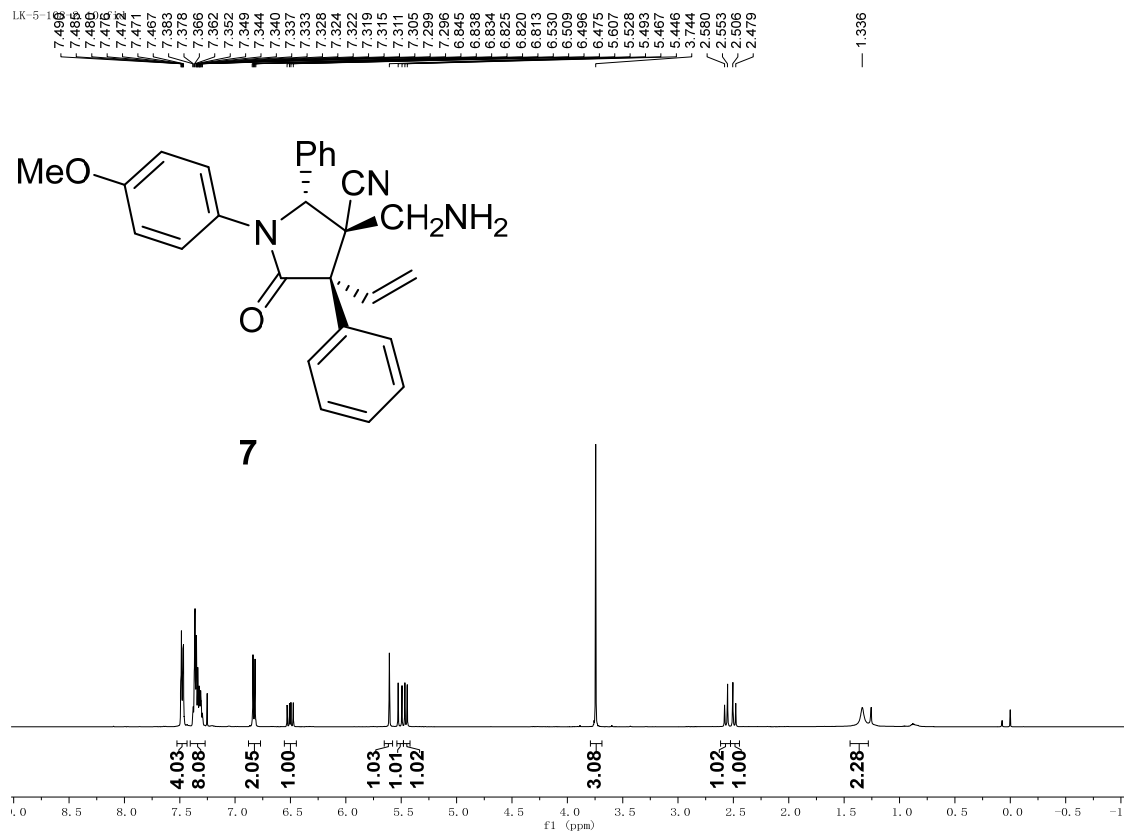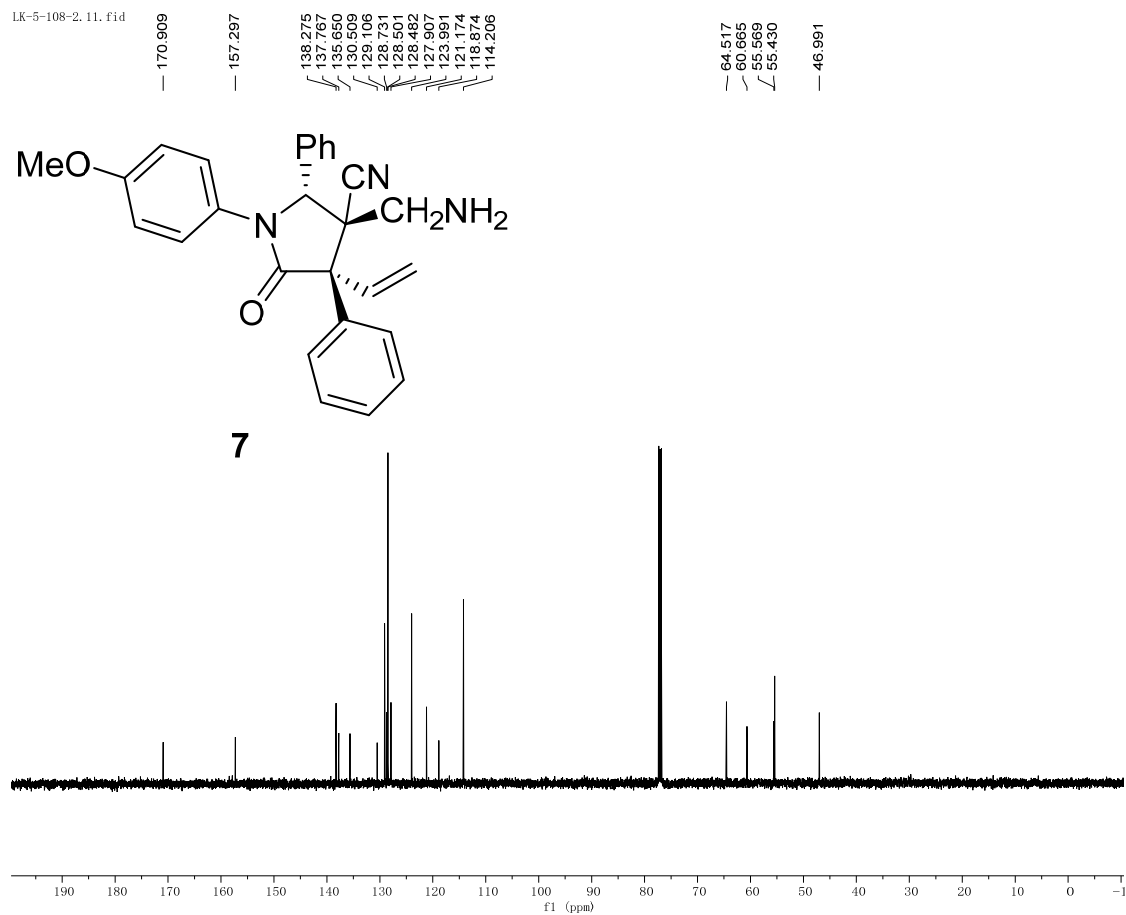

$^1\text{H}$  NMR (500 MHz) and  $^{13}\text{C}$  NMR (125 MHz) spectra of 7

## HPLC Chromatograms of All Products

### HPLC chromatogram of racemic 3aa

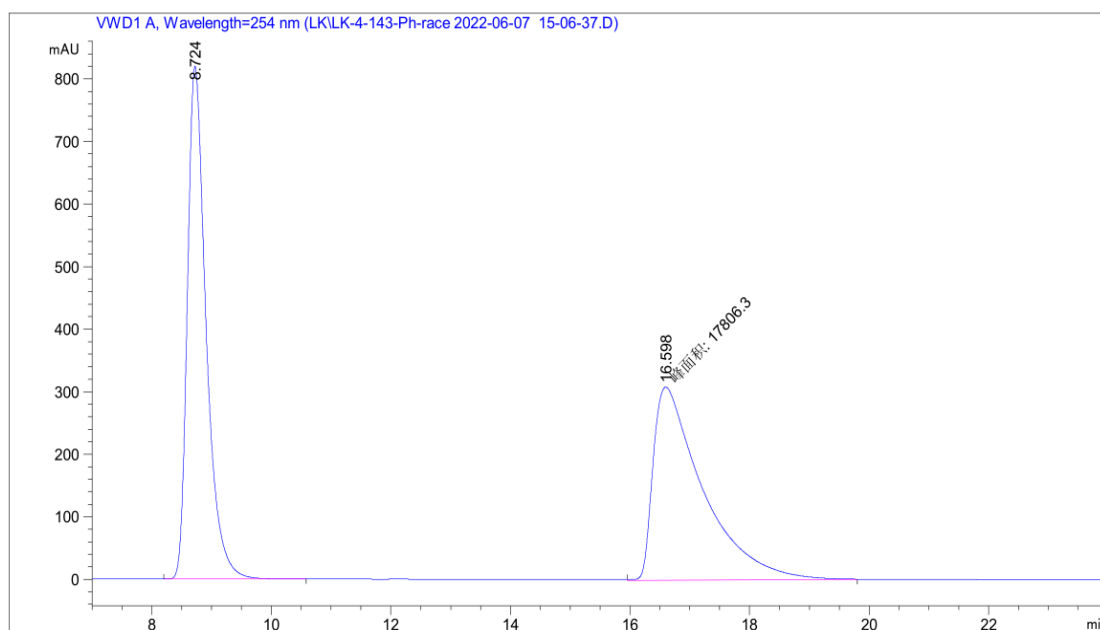

| # | [min]  | [min] | [mAU*s] | [mAU]     | %         |         |
|---|--------|-------|---------|-----------|-----------|---------|
| 1 | 8.724  | BB    | 0.3282  | 1.77930e4 | 819.70538 | 49.9814 |
| 2 | 16.598 | MM    | 0.9627  | 1.78062e4 | 308.27737 | 50.0186 |

### HPLC chromatogram of chiral 3aa

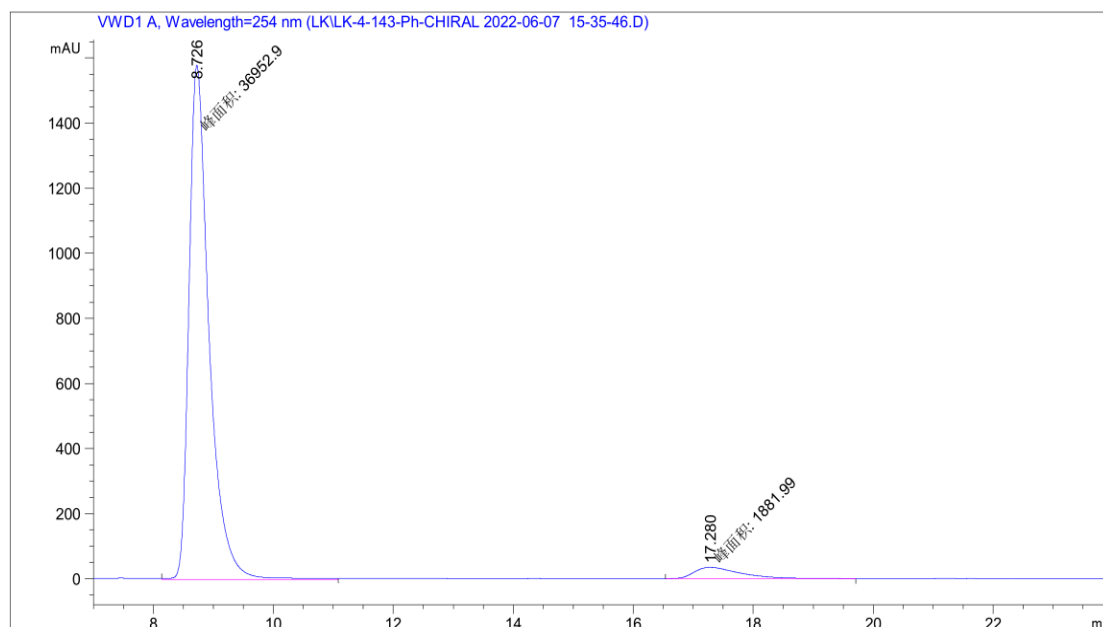

| # | [min]  | [min] | [mAU*s] | [mAU]      | %          |         |
|---|--------|-------|---------|------------|------------|---------|
| 1 | 8.726  | MM    | 0.3897  | 3.69529e4  | 1580.50281 | 95.1539 |
| 2 | 17.280 | MM    | 0.8985  | 1881.99304 | 34.91178   | 4.8461  |

### HPLC chromatogram of racemic 3ba

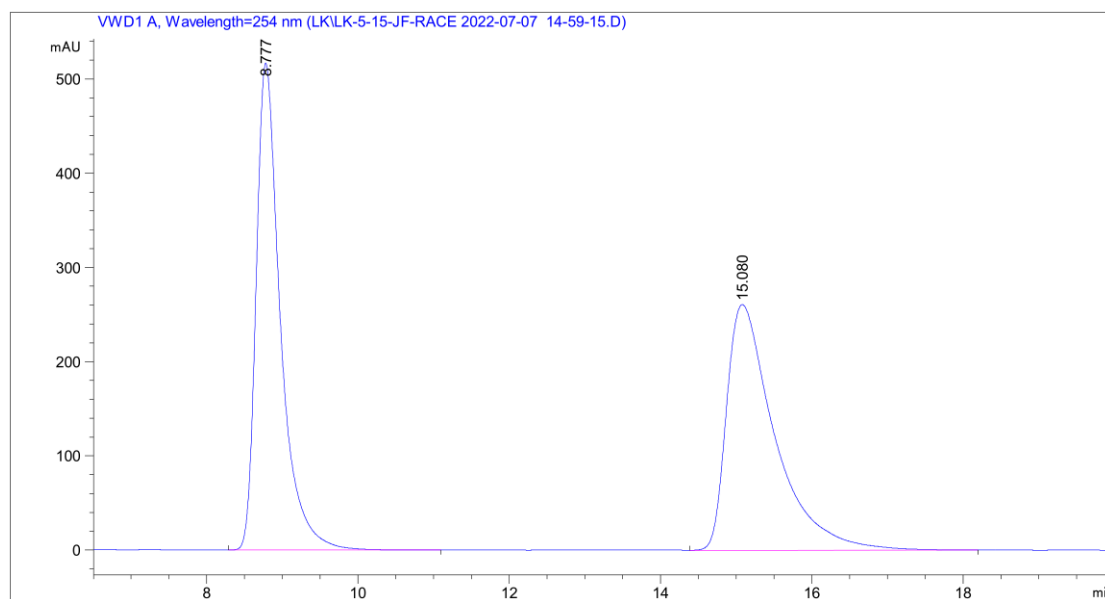

| # | [min]  | [min] | [mAU*s] | [mAU]     | %                 |
|---|--------|-------|---------|-----------|-------------------|
| 1 | 8.777  | BB    | 0.3337  | 1.15038e4 | 516.84399 49.8798 |
| 2 | 15.080 | BB    | 0.6532  | 1.15592e4 | 260.73074 50.1202 |

### HPLC chromatogram of chiral 3ba

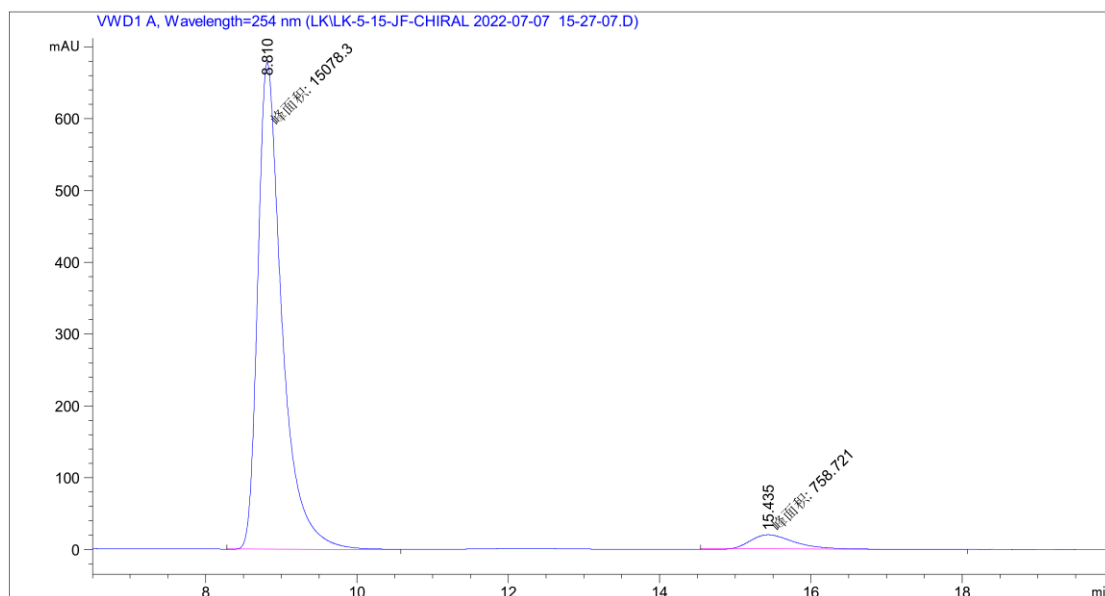

| # | [min]  | [min] | [mAU*s] | [mAU]     | %                 |
|---|--------|-------|---------|-----------|-------------------|
| 1 | 8.810  | MM    | 0.3707  | 1.50783e4 | 677.91364 95.2092 |
| 2 | 15.435 | MM    | 0.6509  | 758.72125 | 19.42758 4.7908   |

## HPLC chromatogram of racemic 3ca

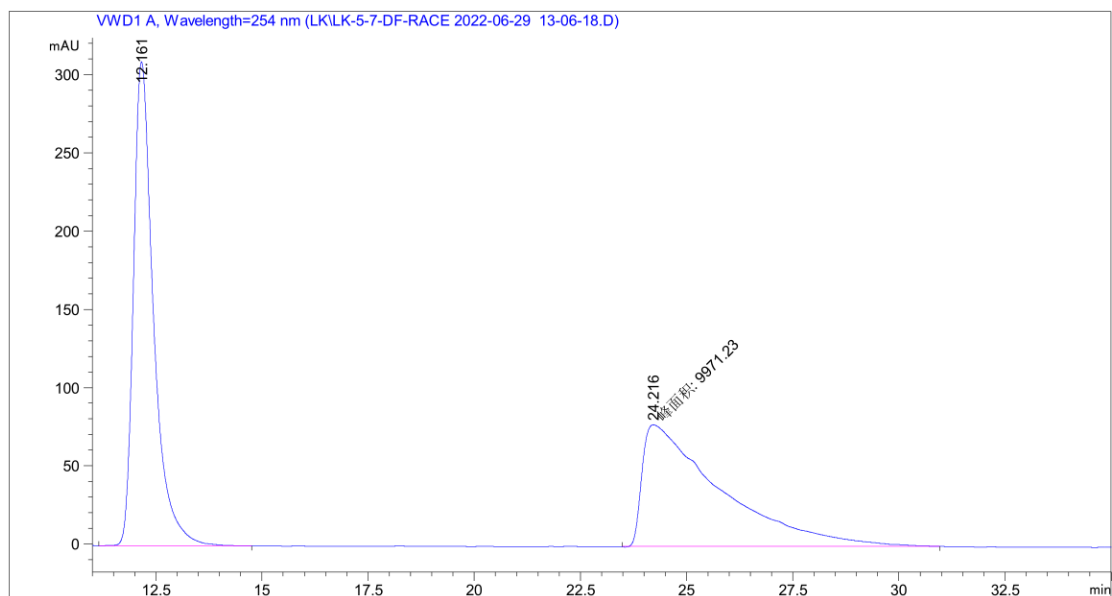

| # | [min]  | [min] | [mAU*s] | [mAU]      | %         |         |
|---|--------|-------|---------|------------|-----------|---------|
| 1 | 12.161 | BB    | 0.4908  | 1.01460e4  | 309.18802 | 50.4343 |
| 2 | 24.216 | MM    | 2.1396  | 9971.23145 | 77.67324  | 49.5657 |

## HPLC chromatogram of chiral 3ca

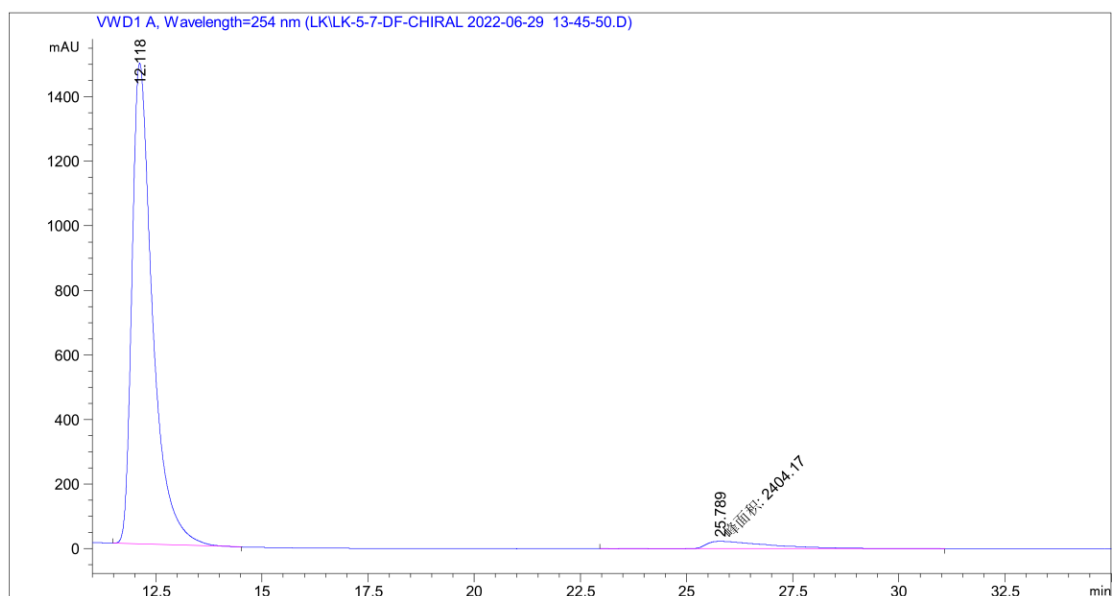

| # | [min]  | [min] | [mAU*s] | [mAU]      | %          |         |
|---|--------|-------|---------|------------|------------|---------|
| 1 | 12.118 | BB    | 0.5046  | 5.02312e4  | 1489.04077 | 95.4324 |
| 2 | 25.789 | MM    | 1.7498  | 2404.16504 | 22.89896   | 4.5676  |

### HPLC chromatogram of racemic 3da

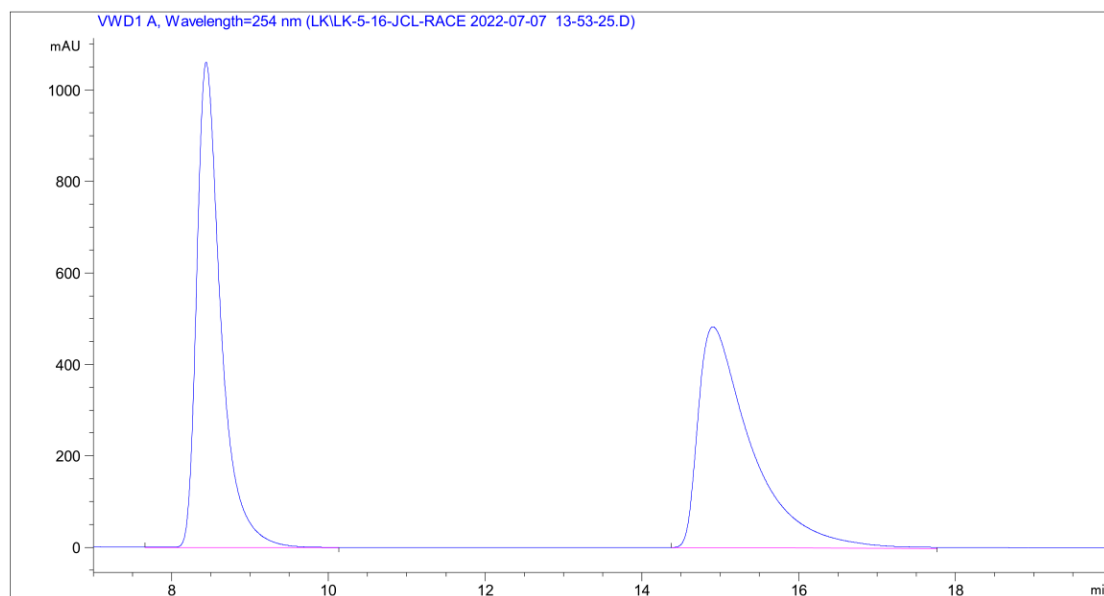

| # | [min]  | [min] | [mAU*s] | %         |         |
|---|--------|-------|---------|-----------|---------|
| 1 | 8.440  | VB    | 0.3221  | 2.27468e4 | 49.8292 |
| 2 | 14.905 | MM    | 0.7899  | 2.29027e4 | 50.1708 |

### HPLC chromatogram of chiral 3da

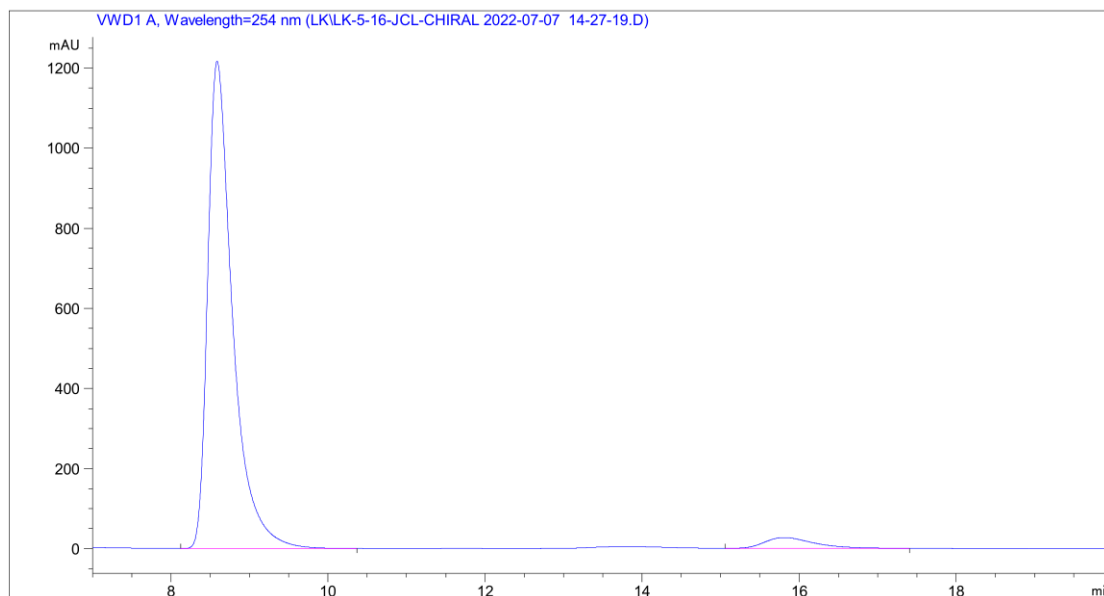

| # | [min]  | [min] | [mAU*s] | %          |         |
|---|--------|-------|---------|------------|---------|
| 1 | 8.587  | VB    | 0.3300  | 2.68112e4  | 95.6306 |
| 2 | 15.809 | VB    | 0.6739  | 1225.02551 | 4.3694  |

## HPLC chromatogram of racemic 3ea

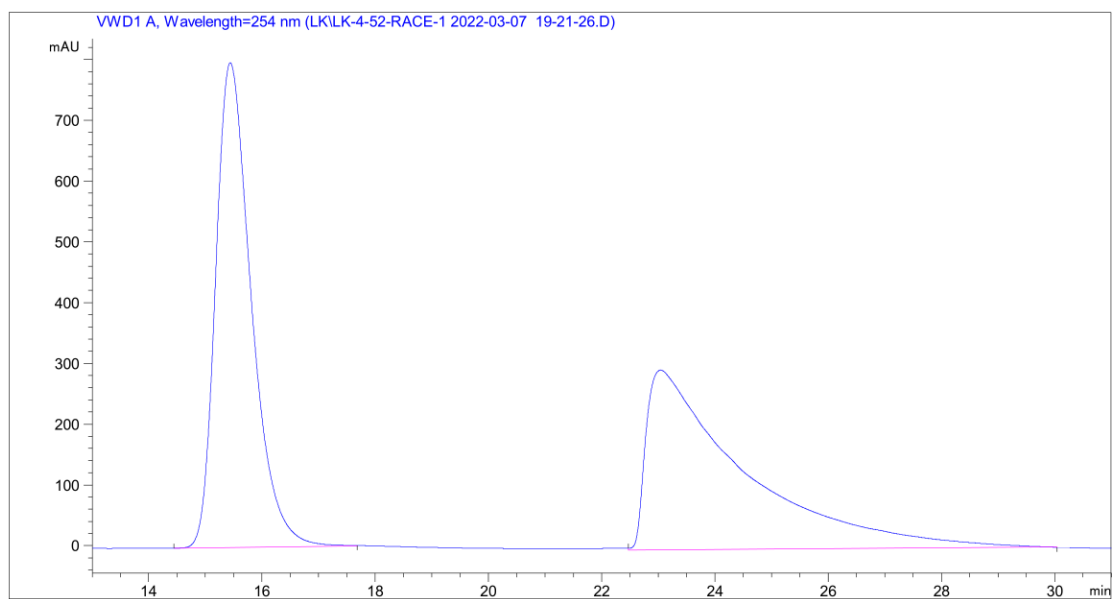

| # | [min]  | [min] | [mAU*s] | %         |         |
|---|--------|-------|---------|-----------|---------|
| 1 | 15.439 | MM    | 0.7295  | 3.49062e4 | 49.7790 |
| 2 | 23.041 | MM    | 1.9846  | 3.52162e4 | 50.2210 |

## HPLC chromatogram of chiral 3ea

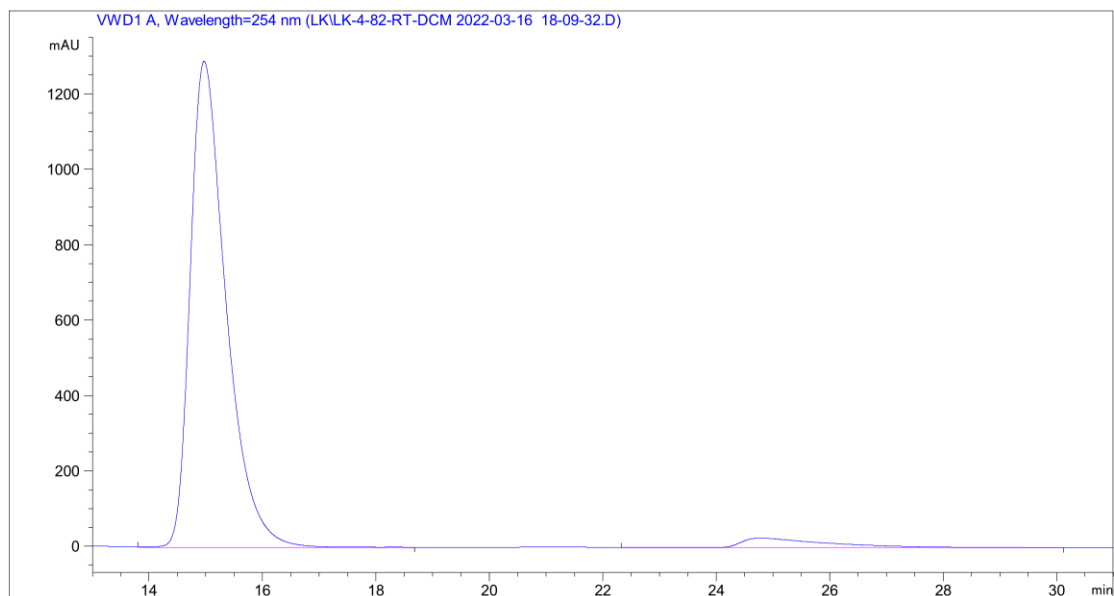

| # | [min]  | [min] | [mAU*s] | %          |         |
|---|--------|-------|---------|------------|---------|
| 1 | 14.971 | MM    | 0.7356  | 5.69326e4  | 95.9517 |
| 2 | 24.789 | MM    | 1.6323  | 2402.05786 | 4.0483  |

## HPLC chromatogram of racemic 3fa

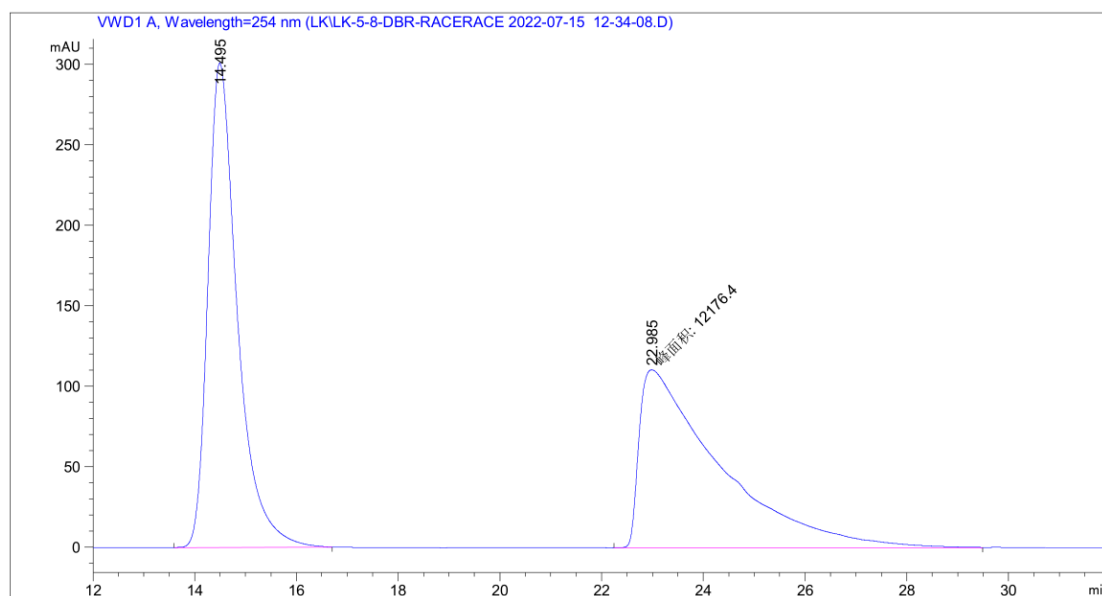

| # | [min]  | [min] | [mAU*s] | [mAU]     | %         |         |
|---|--------|-------|---------|-----------|-----------|---------|
| 1 | 14.495 | BB    | 0.6062  | 1.21084e4 | 301.09158 | 49.8601 |
| 2 | 22.985 | MM    | 1.8310  | 1.21764e4 | 110.83334 | 50.1399 |

## HPLC chromatogram of chiral 3fa

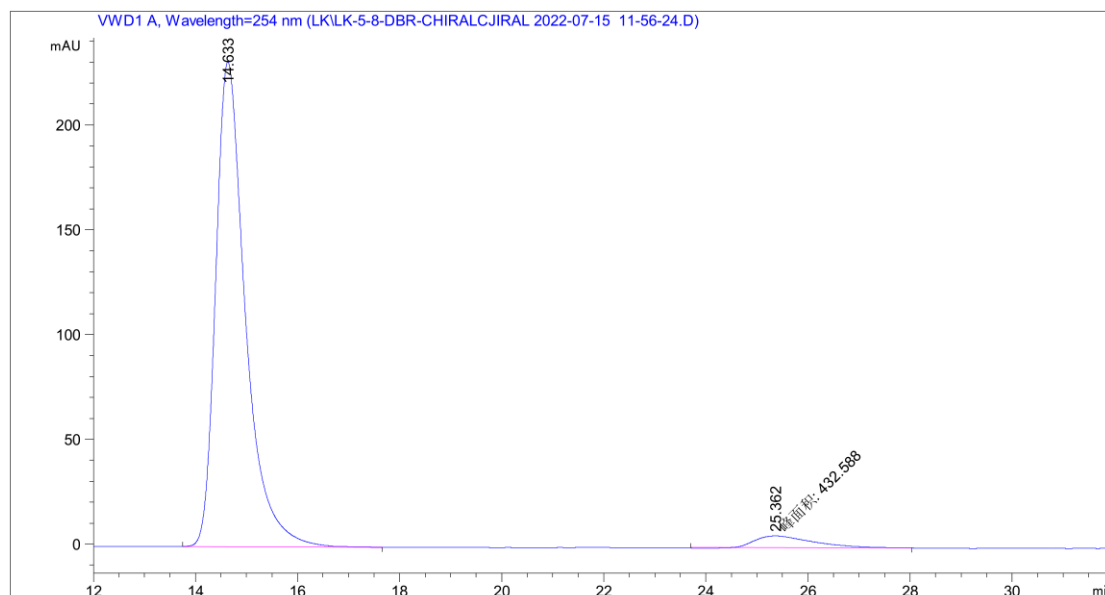

| # | [min]  | [min] | [mAU*s] | [mAU]      | %         |         |
|---|--------|-------|---------|------------|-----------|---------|
| 1 | 14.633 | BB    | 0.6075  | 9326.43750 | 231.26280 | 95.5673 |
| 2 | 25.362 | MM    | 1.3008  | 432.58820  | 5.54270   | 4.4327  |



## HPLC chromatogram of racemic 3ga

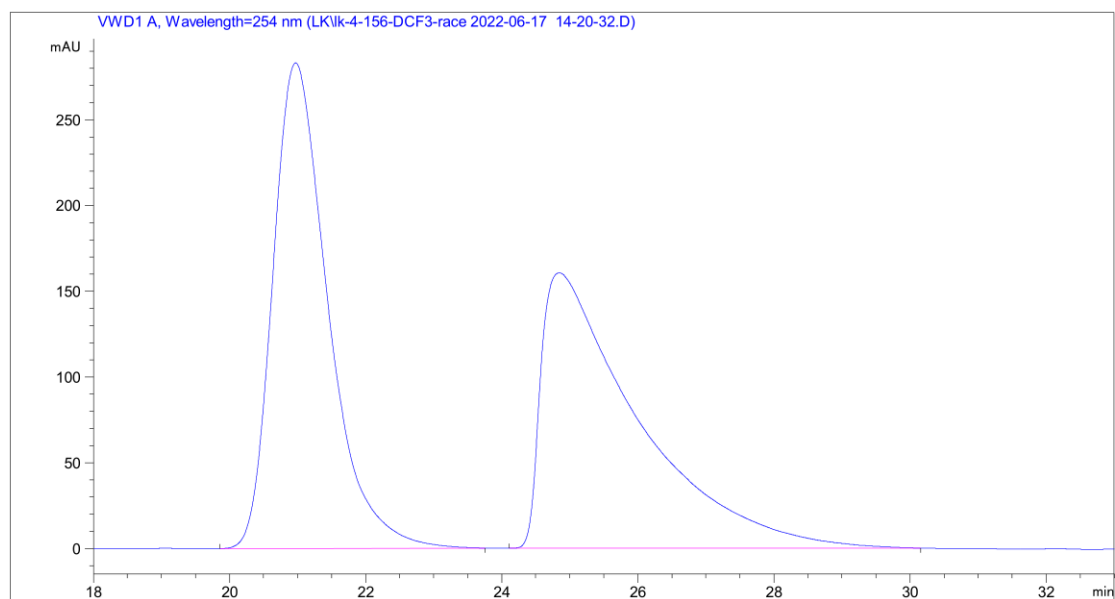

| # | [min]  | [min] | [mAU*s] | %         |         |
|---|--------|-------|---------|-----------|---------|
| 1 | 20.972 | BB    | 0.8731  | 1.59504e4 | 50.1490 |
| 2 | 24.845 | BB    | 1.3688  | 1.58556e4 | 49.8510 |

## HPLC chromatogram of chiral 3ga

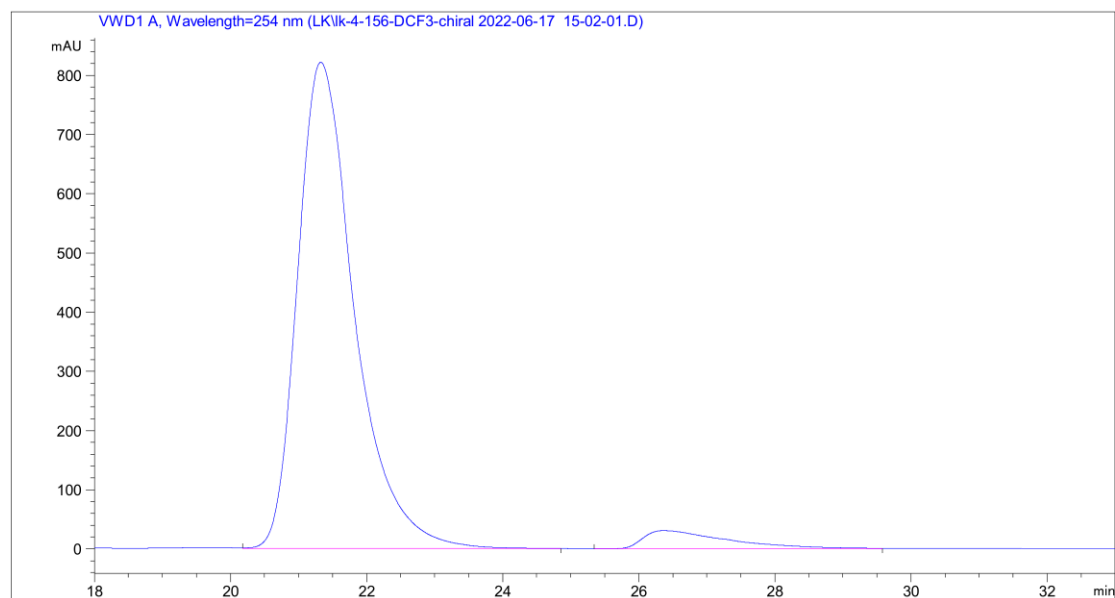

| # | [min]  | [min] | [mAU*s] | %          |         |
|---|--------|-------|---------|------------|---------|
| 1 | 21.327 | VB    | 0.8852  | 4.77424e4  | 94.8509 |
| 2 | 26.364 | MM    | 1.4100  | 2591.74219 | 5.1491  |

## HPLC chromatogram of racemic 3ha

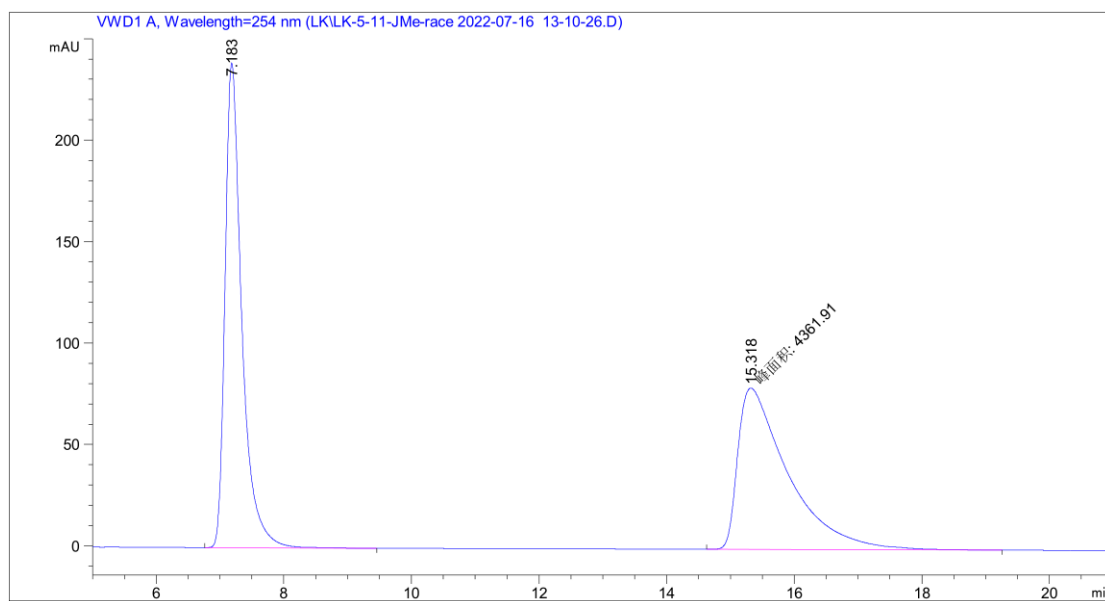

| # | [min]  | [min] | [mAU*s] | [mAU]      | %                 |
|---|--------|-------|---------|------------|-------------------|
| 1 | 7.183  | BB    | 0.2732  | 4367.15967 | 238.93665 50.0301 |
| 2 | 15.318 | MM    | 0.9143  | 4361.90723 | 79.51097 49.9699  |

## HPLC chromatogram of chiral 3ha

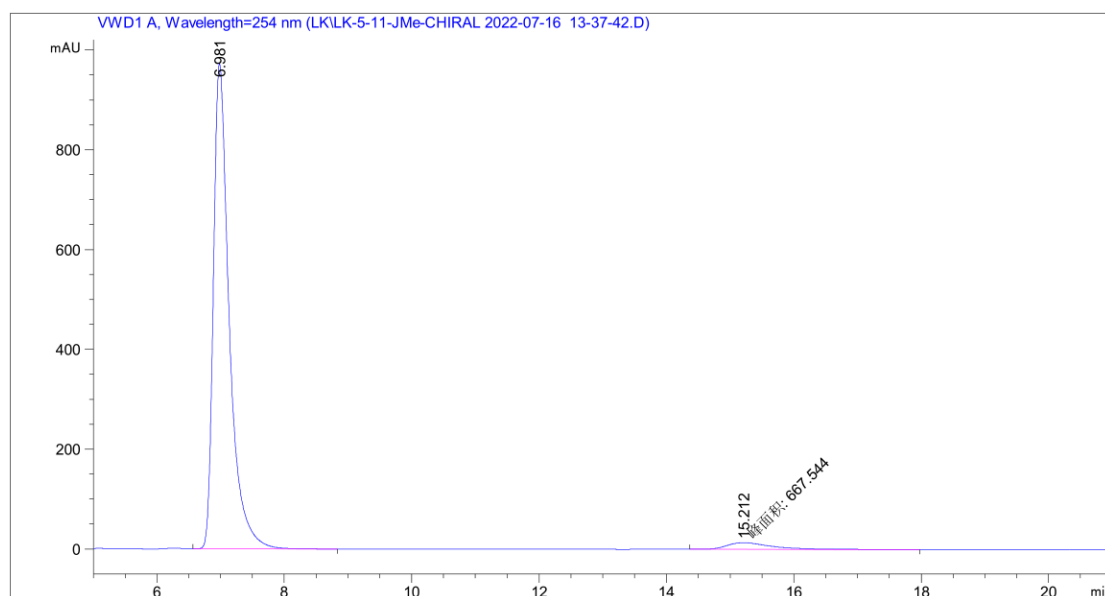

| # | [min]  | [min] | [mAU*s] | [mAU]     | %                 |
|---|--------|-------|---------|-----------|-------------------|
| 1 | 6.981  | BB    | 0.2573  | 1.67711e4 | 972.10944 96.1720 |
| 2 | 15.212 | MM    | 0.8474  | 667.54431 | 13.12926 3.8280   |

### HPLC chromatogram of racemic 3ia

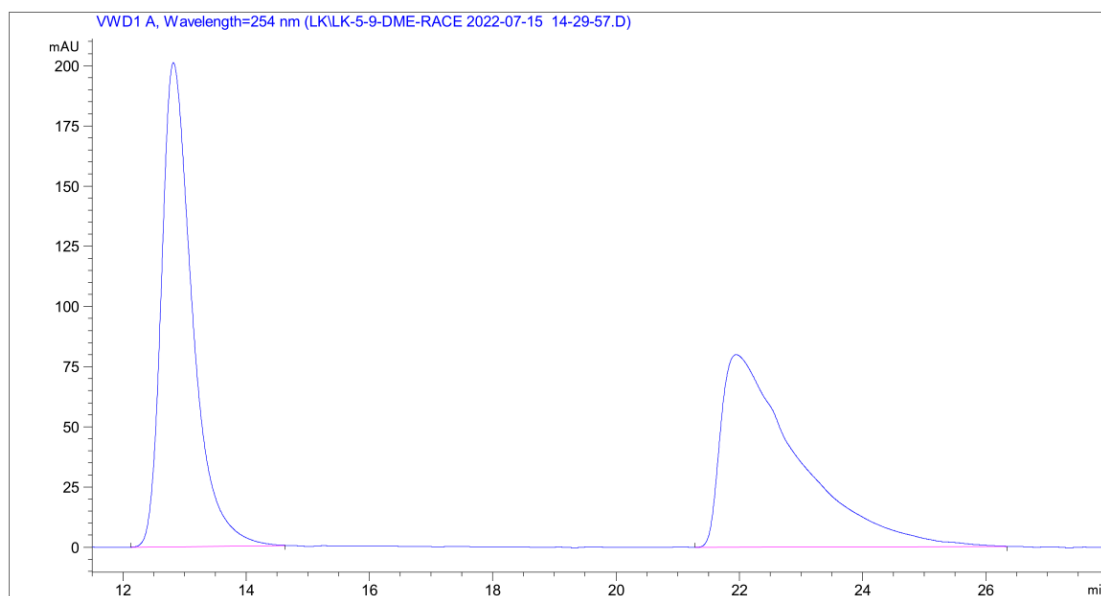

| # | [min]  | [min] | [mAU*s]           | %       |
|---|--------|-------|-------------------|---------|
| 1 | 12.822 | BB    | 0.5243 6986.02930 | 50.1784 |
| 2 | 21.951 | BB    | 1.2013 6936.34082 | 49.8216 |

### HPLC chromatogram of chiral 3ia

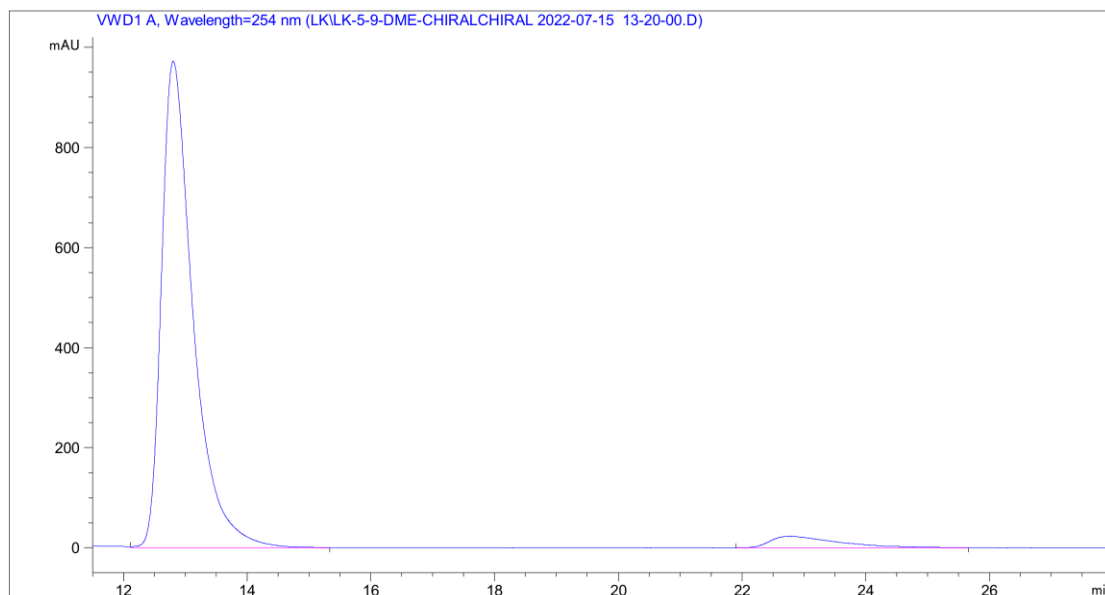

| # | [min]  | [min] | [mAU*s]           | %       |
|---|--------|-------|-------------------|---------|
| 1 | 12.808 | VB    | 0.5339 3.44819e4  | 95.1610 |
| 2 | 22.778 | BB    | 1.1110 1753.44043 | 4.8390  |

### HPLC chromatogram of racemic 3ja

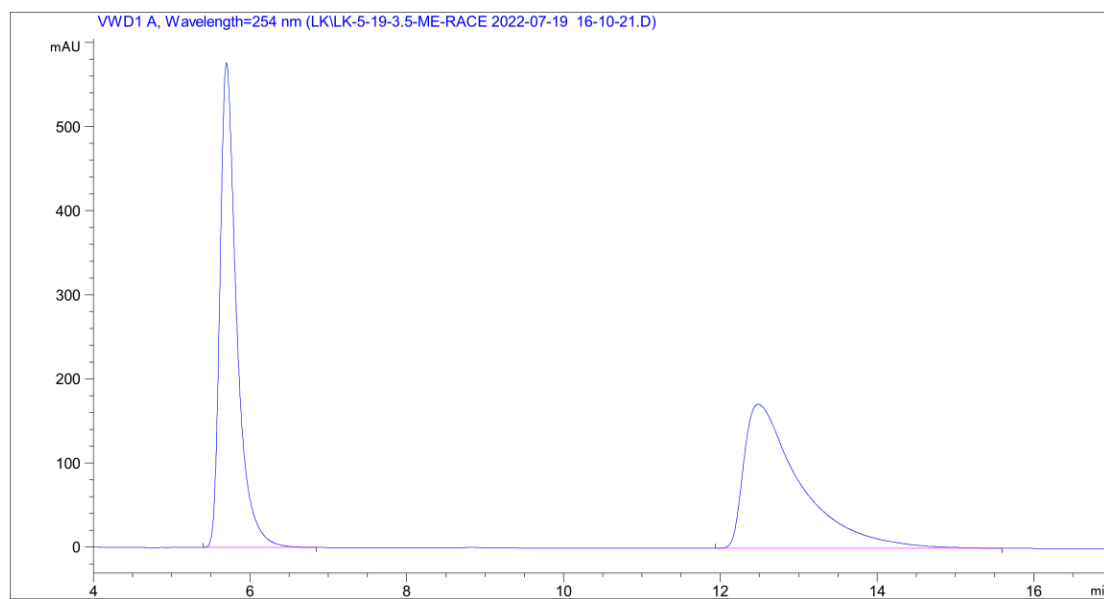

| # | [min]  | [min] | [mAU*s]           | %       |
|---|--------|-------|-------------------|---------|
| 1 | 5.702  | BB    | 0.2218 8538.40723 | 50.0256 |
| 2 | 12.484 | BB    | 0.7202 8529.68164 | 49.9744 |

### HPLC chromatogram of chiral 3ja

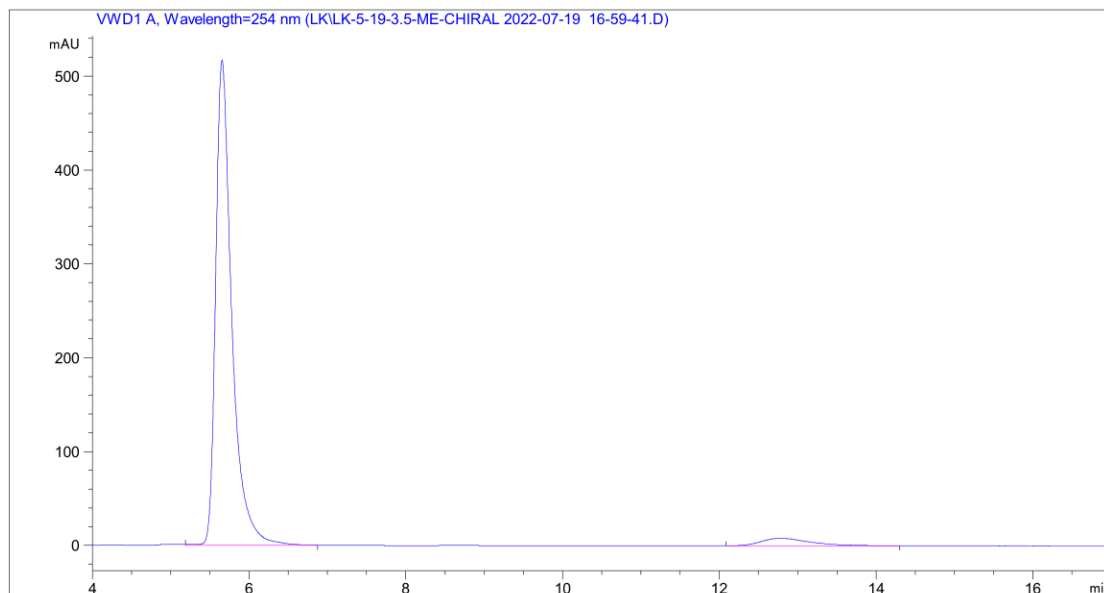

| # | [min]  | [min] | [mAU*s]           | %       |
|---|--------|-------|-------------------|---------|
| 1 | 5.657  | VB    | 0.2133 7408.94873 | 95.4209 |
| 2 | 12.785 | MM    | 0.7482 355.54395  | 4.5791  |

### HPLC chromatogram of racemic 3ka

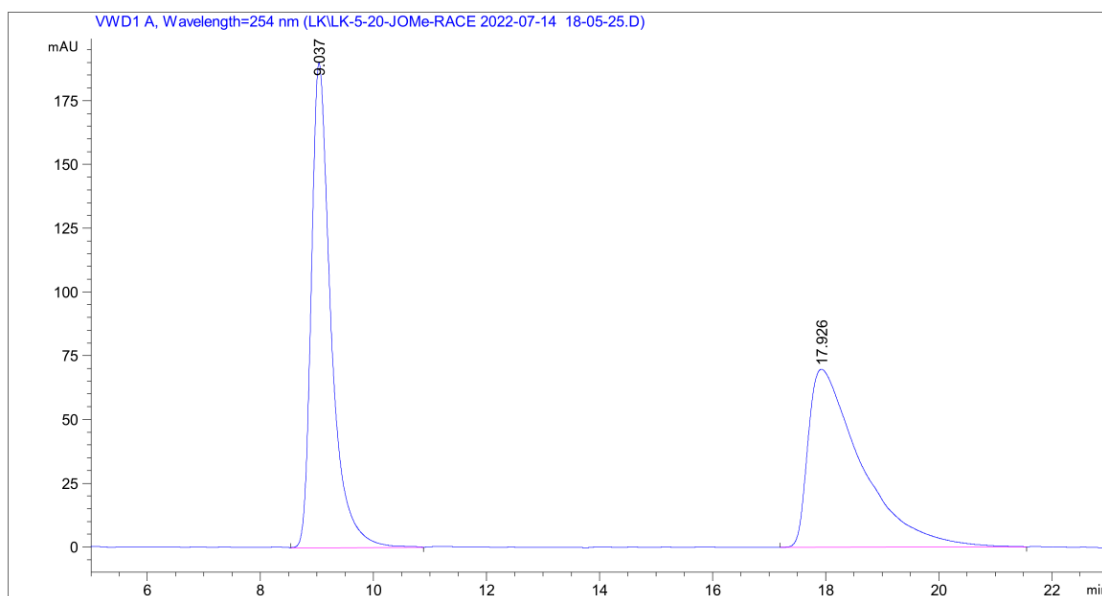

| # | [min]  | [min] | [mAU*s] | [mAU]      | %         |         |
|---|--------|-------|---------|------------|-----------|---------|
| 1 | 9.037  | BB    | 0.3603  | 4583.00537 | 190.09694 | 50.2988 |
| 2 | 17.926 | BB    | 0.9254  | 4528.54688 | 69.75281  | 49.7012 |

### HPLC chromatogram of chiral 3ka

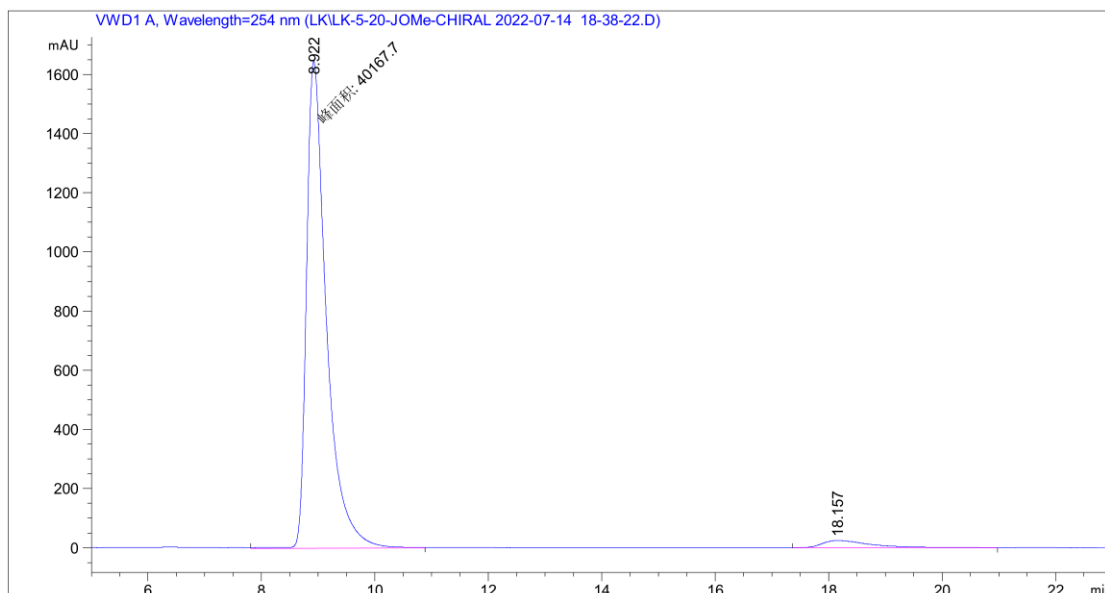

| # | [min]  | [min] | [mAU*s] | [mAU]      | %          |         |
|---|--------|-------|---------|------------|------------|---------|
| 1 | 8.922  | MM    | 0.4068  | 4.01677e4  | 1645.86377 | 96.5148 |
| 2 | 18.157 | BB    | 0.8887  | 1450.47156 | 24.32479   | 3.4852  |

## HPLC chromatogram of racemic 3la

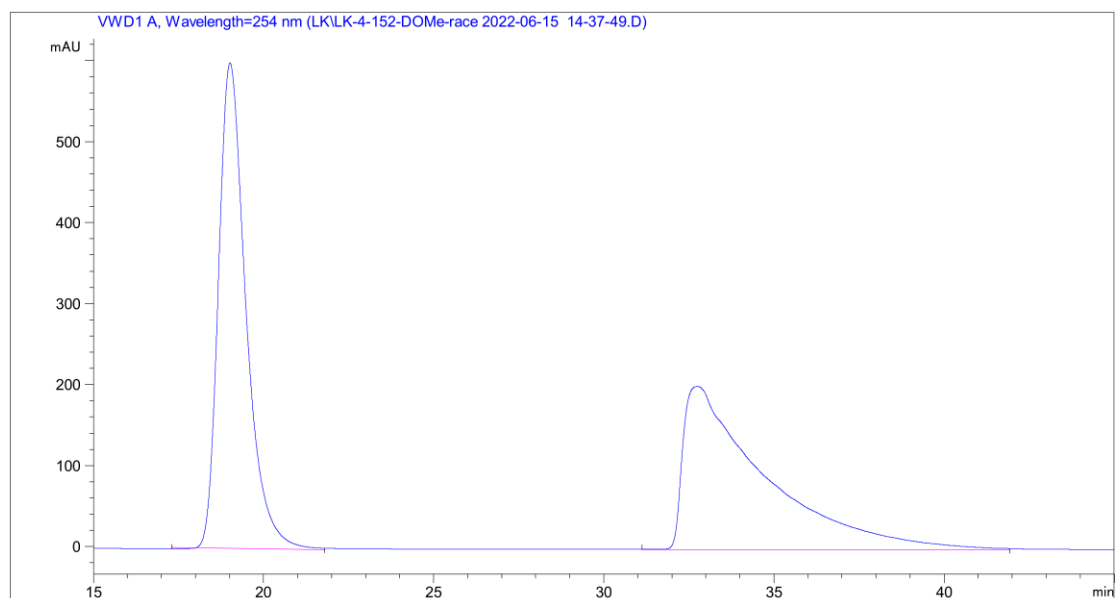

| # | [min]  | [min]     | [mAU*s]   | %       |
|---|--------|-----------|-----------|---------|
| 1 | 19.017 | MM 0.9332 | 3.35479e4 | 49.9348 |
| 2 | 32.754 | MM 2.7830 | 3.36355e4 | 50.0652 |

## HPLC chromatogram of chiral 3la

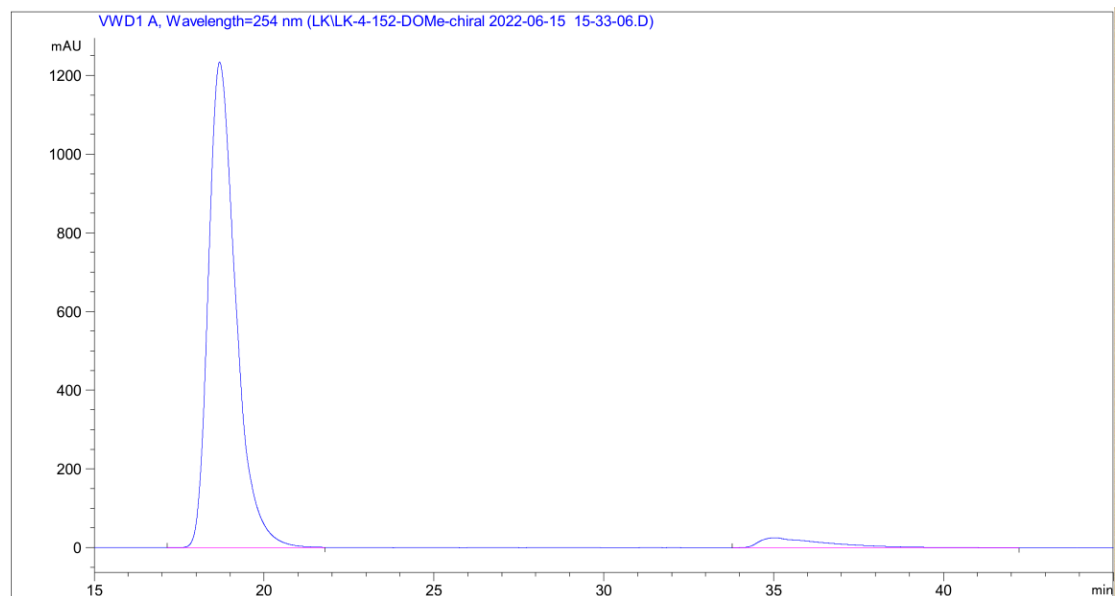

| # | [min]  | [min]     | [mAU*s]    | %       |
|---|--------|-----------|------------|---------|
| 1 | 18.693 | MM 0.9354 | 6.92964e4  | 95.1047 |
| 2 | 35.055 | MM 2.2887 | 3566.83887 | 4.8953  |

## HPLC chromatogram of racemic 3ma

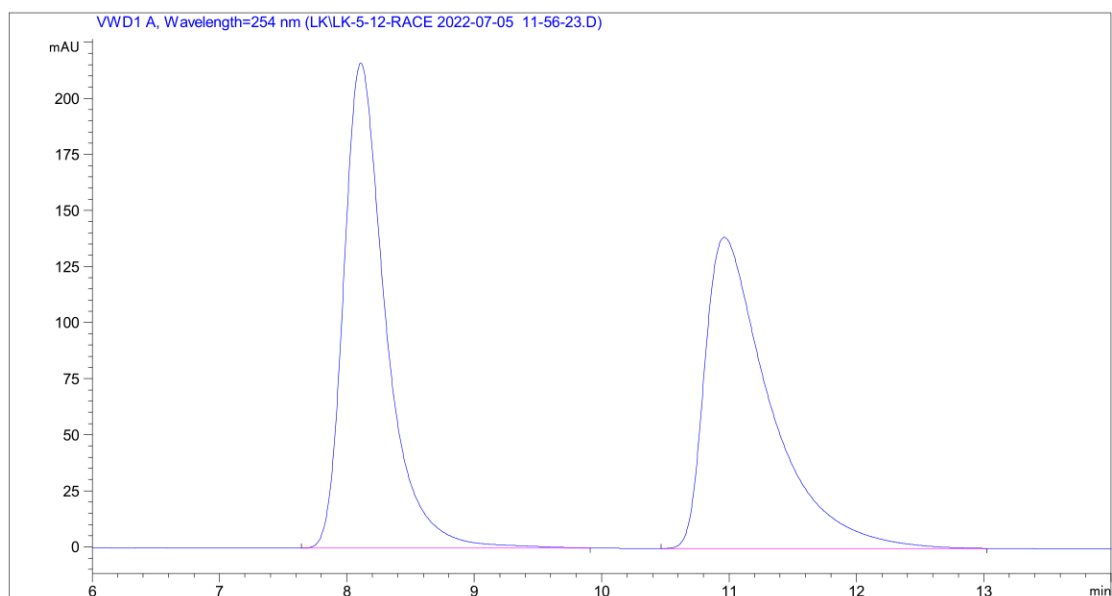

| # | [min]  | [min] | [mAU*s]           | %       |
|---|--------|-------|-------------------|---------|
| 1 | 8.109  | BB    | 0.3446 4959.45898 | 50.1475 |
| 2 | 10.964 | BB    | 0.5214 4930.29053 | 49.8525 |

## HPLC chromatogram of chiral 3ma

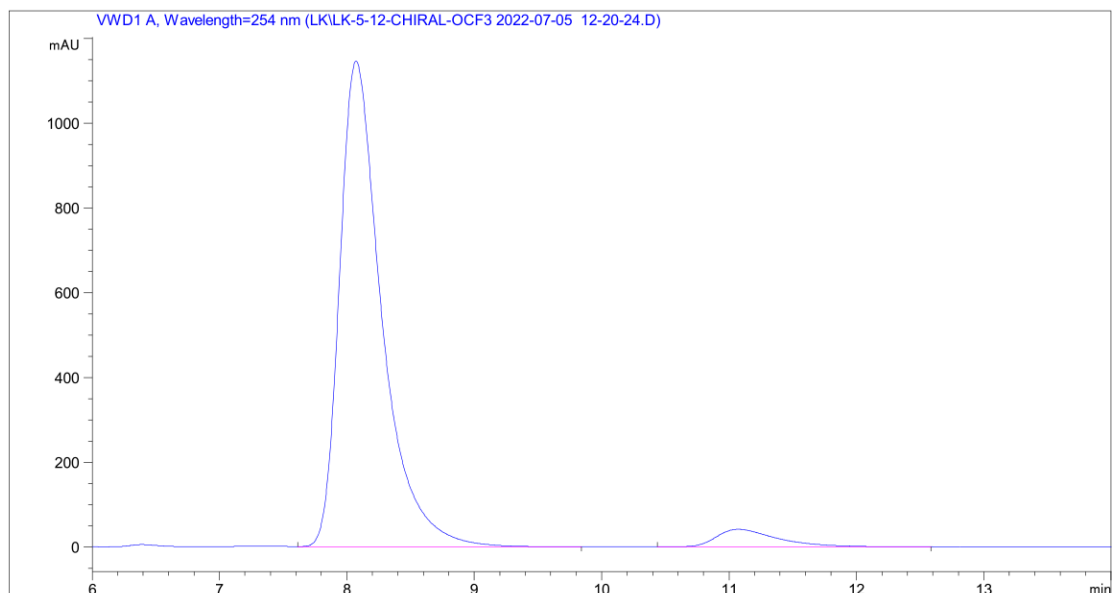

| # | [min]  | [min] | [mAU*s]           | %       |
|---|--------|-------|-------------------|---------|
| 1 | 8.071  | VB    | 0.3460 2.64389e4  | 94.9095 |
| 2 | 11.072 | VB    | 0.5076 1418.06592 | 5.0905  |

### HPLC chromatogram of racemic 3na

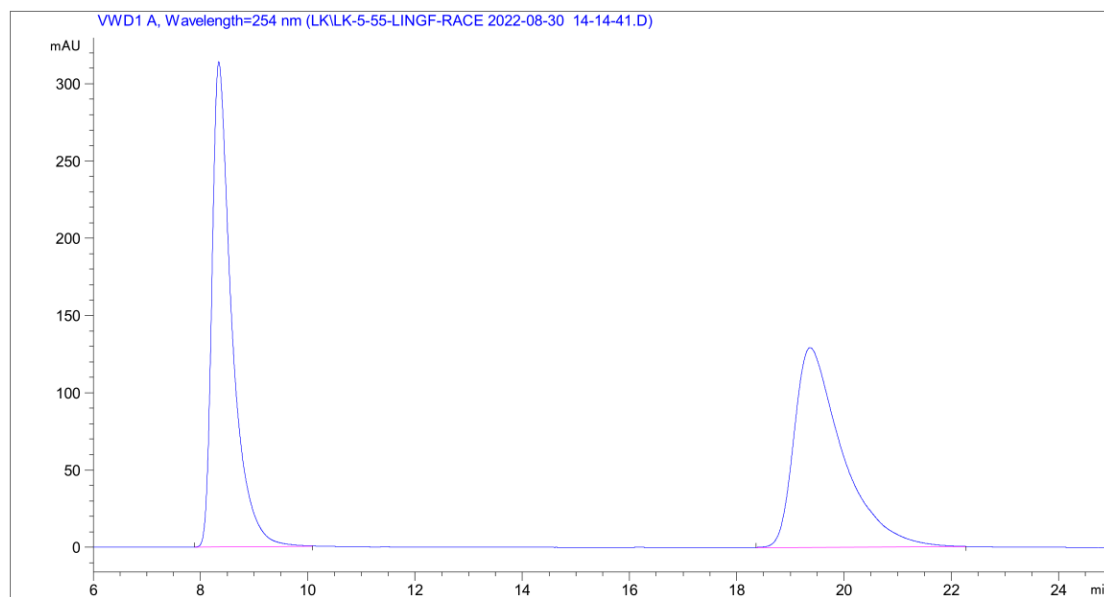

| # | [min]  | [min] | [mAU*s]           | %       |
|---|--------|-------|-------------------|---------|
| 1 | 8.343  | BB    | 0.3746 8036.51709 | 49.9966 |
| 2 | 19.368 | BB    | 0.9140 8037.61084 | 50.0034 |

### HPLC chromatogram of chiral 3na

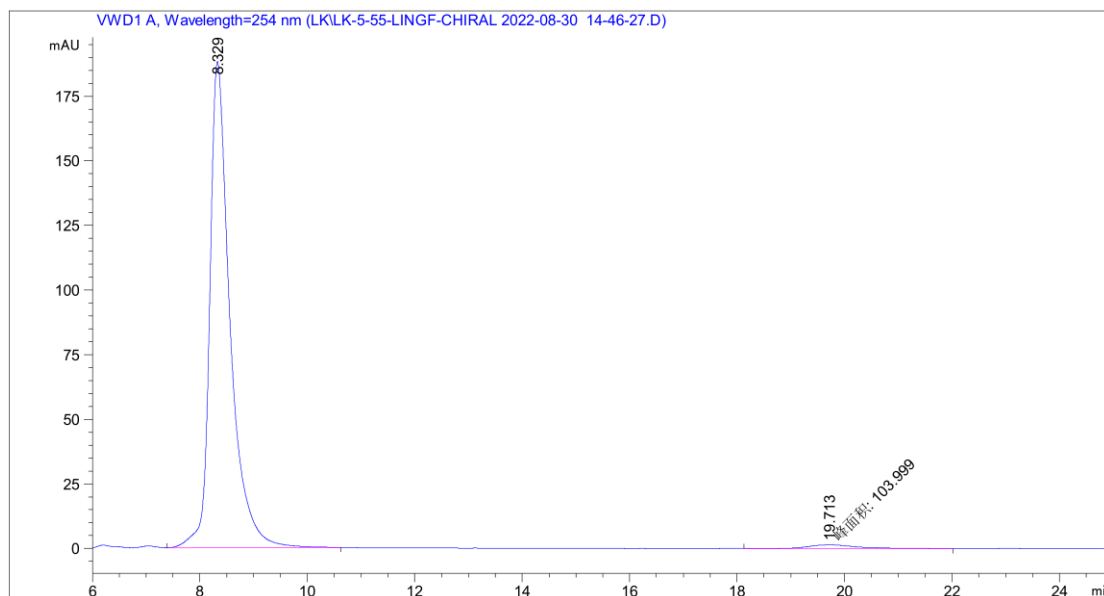

| # | [min]  | [min] | [mAU*s]           | [mAU]     | %       |
|---|--------|-------|-------------------|-----------|---------|
| 1 | 8.329  | BB    | 0.3863 4939.54346 | 188.13016 | 97.9380 |
| 2 | 19.713 | MM    | 1.1251 103.99916  | 1.54053   | 2.0620  |



### HPLC chromatogram of racemic 3oa

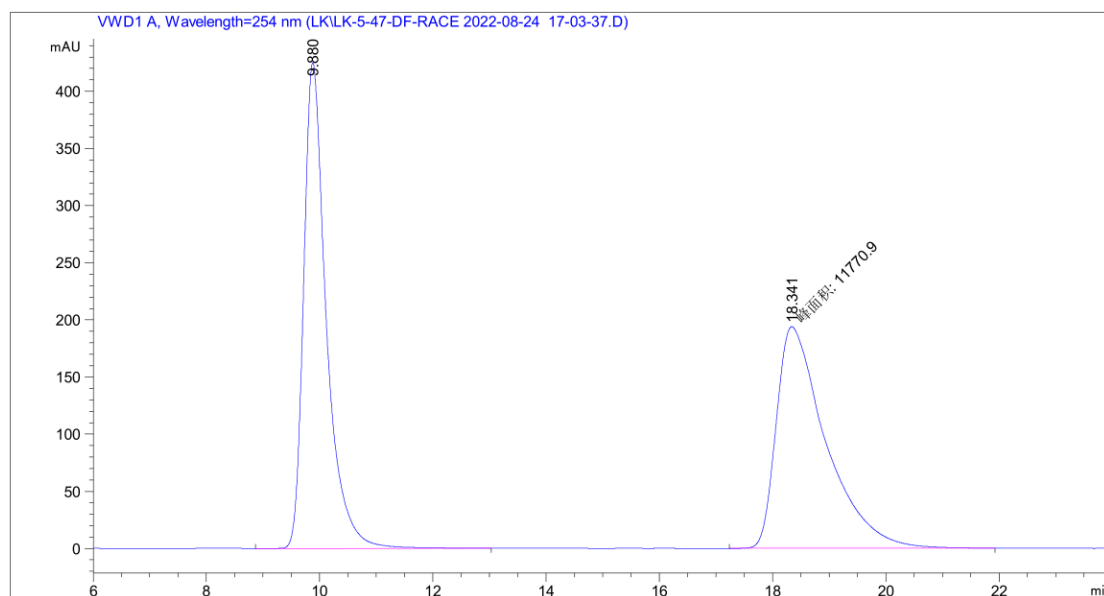

| # | [min]  | [min] | [mAU*s] | [mAU]     | %         |         |
|---|--------|-------|---------|-----------|-----------|---------|
| 1 | 9.880  | BB    | 0.4144  | 1.18162e4 | 424.94348 | 50.0960 |
| 2 | 18.341 | MM    | 1.0121  | 1.17709e4 | 193.84132 | 49.9040 |

### HPLC chromatogram of chiral 3oa

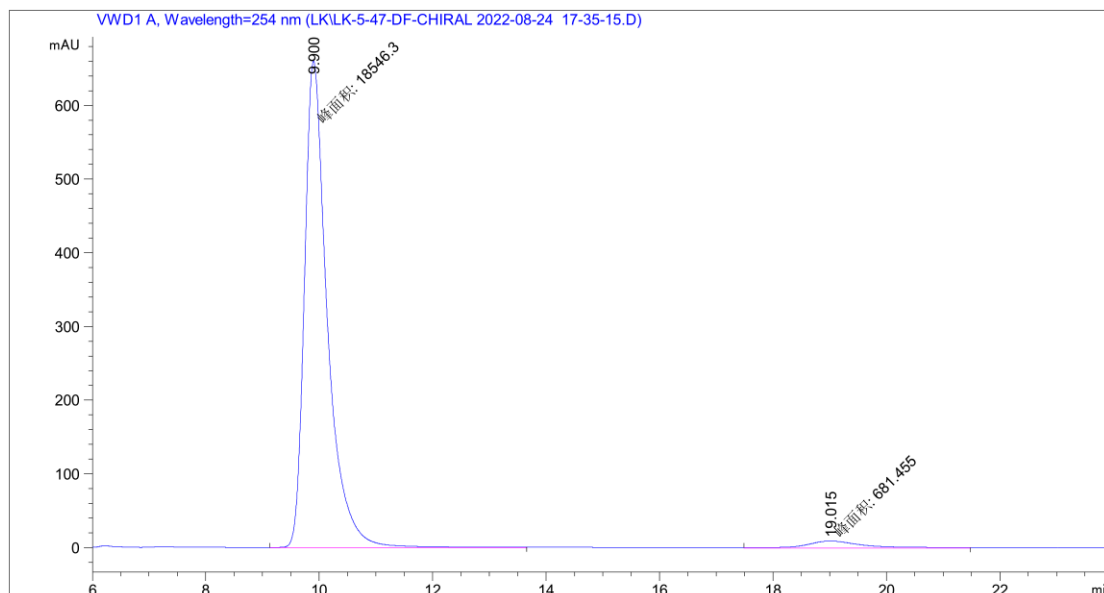

| # | [min]  | [min] | [mAU*s] | [mAU]     | %         |         |
|---|--------|-------|---------|-----------|-----------|---------|
| 1 | 9.900  | MM    | 0.4680  | 1.85463e4 | 660.43506 | 96.4559 |
| 2 | 19.015 | MM    | 1.1973  | 681.45453 | 9.48579   | 3.5441  |

## HPLC chromatogram of racemic 3pa

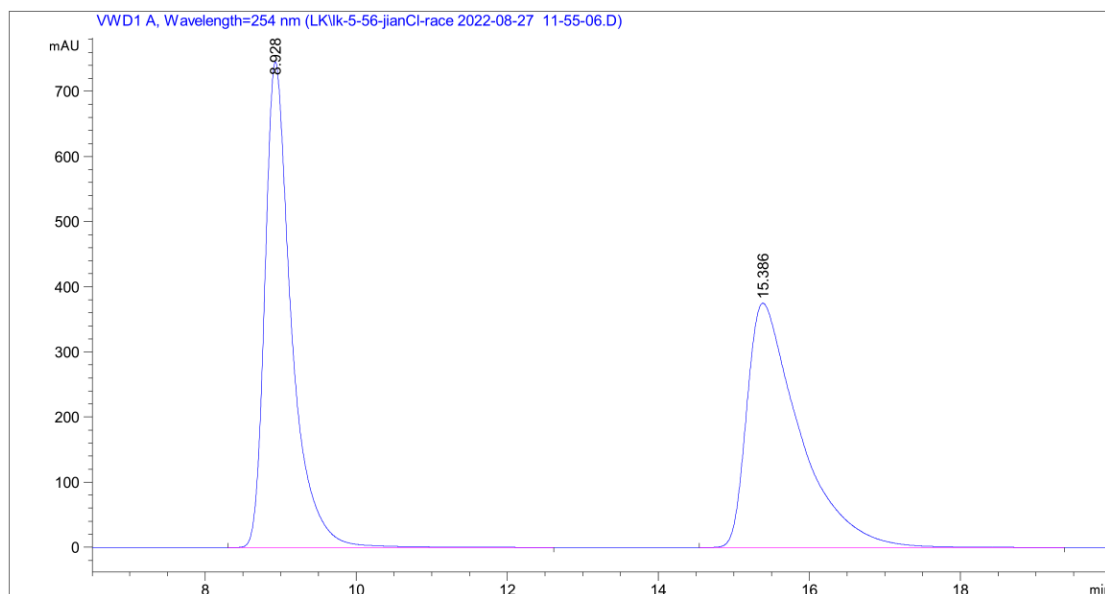

| # | [min]  | [min] | [mAU*s] | [mAU]     | %         |         |
|---|--------|-------|---------|-----------|-----------|---------|
| 1 | 8.928  | BB    | 0.3619  | 1.82076e4 | 745.71851 | 50.1274 |
| 2 | 15.386 | BB    | 0.6963  | 1.81150e4 | 375.16321 | 49.8726 |

## HPLC chromatogram of chiral 3pa

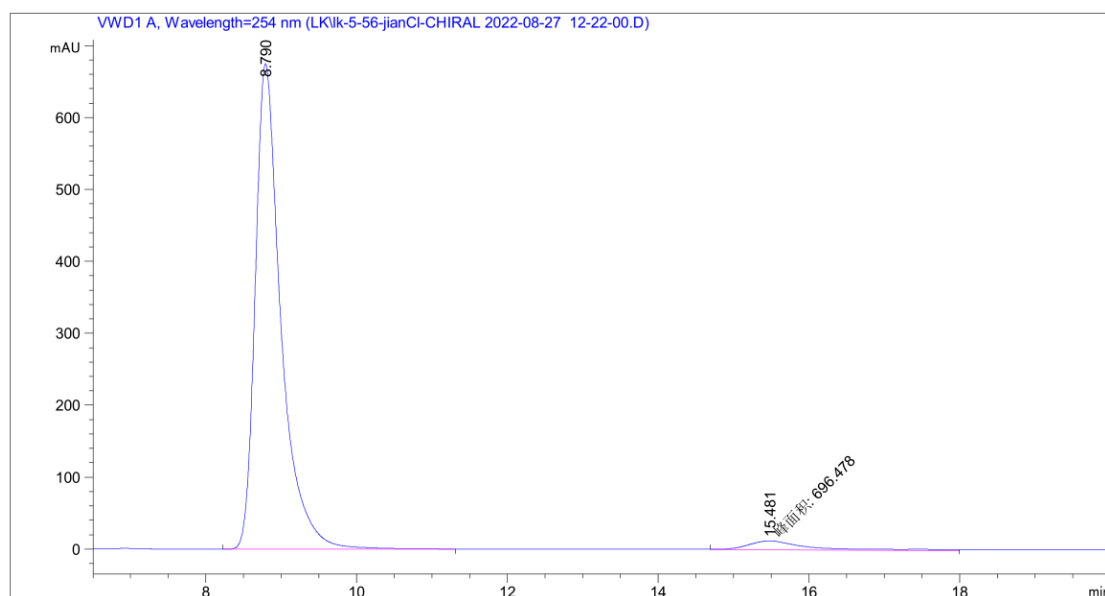

| # | [min]  | [min] | [mAU*s] | [mAU]     | %         |         |
|---|--------|-------|---------|-----------|-----------|---------|
| 1 | 8.790  | BB    | 0.3517  | 1.60045e4 | 674.81464 | 95.8297 |
| 2 | 15.481 | MM    | 0.9177  | 696.47778 | 12.64919  | 4.1703  |

## HPLC chromatogram of racemic 3qa

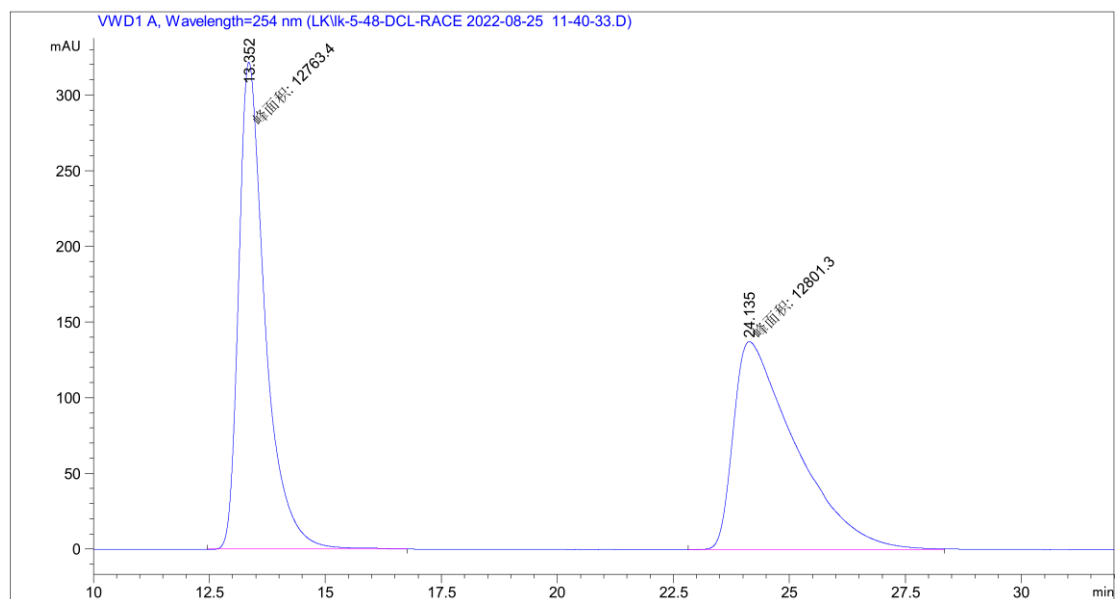

| # | [min]  | [min] | [mAU*s] | [mAU]     | %                 |
|---|--------|-------|---------|-----------|-------------------|
| 1 | 13.352 | MM    | 0.6615  | 1.27634e4 | 321.59570 49.9258 |
| 2 | 24.135 | MM    | 1.5518  | 1.28013e4 | 137.48785 50.0742 |

## HPLC chromatogram of chiral 3qa

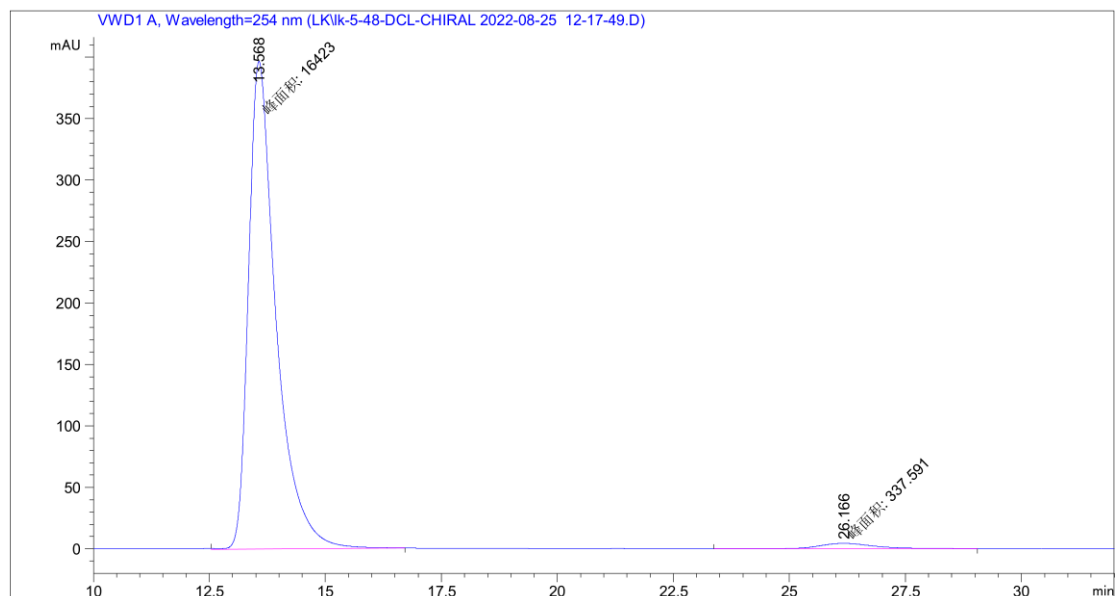

| # | [min]  | [min] | [mAU*s] | [mAU]     | %                 |
|---|--------|-------|---------|-----------|-------------------|
| 1 | 13.568 | MM    | 0.6899  | 1.64230e4 | 396.73520 97.9858 |
| 2 | 26.166 | MM    | 1.3021  | 337.59055 | 4.32118 2.0142    |

### HPLC chromatogram of racemic 3ra

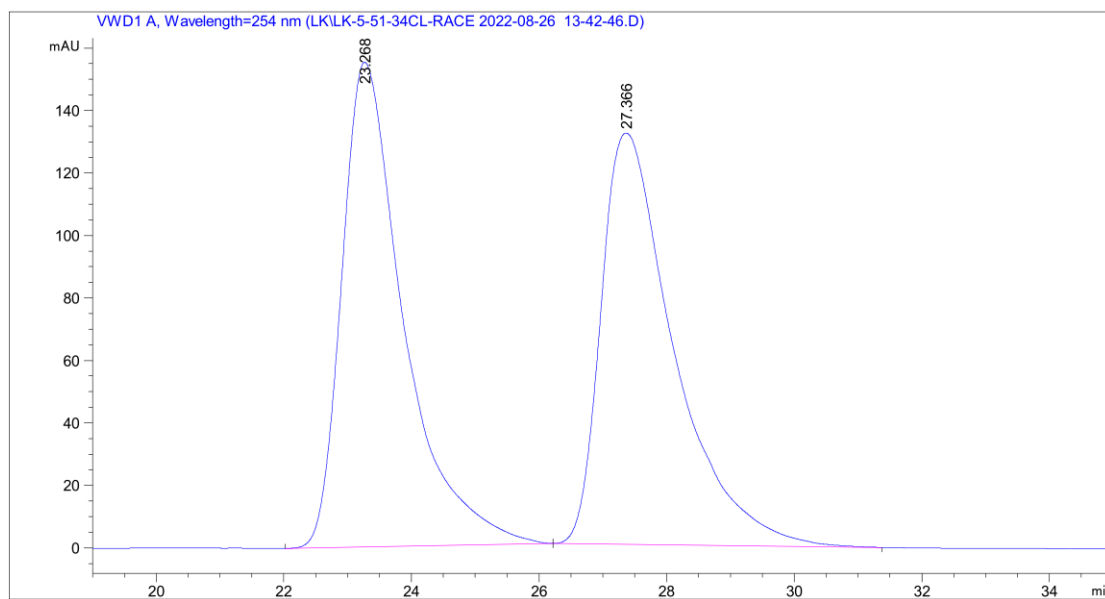

| # | [min]  | [min] | [mAU*s] | [mAU]     | %                 |
|---|--------|-------|---------|-----------|-------------------|
| 1 | 23.268 | BB    | 1.0026  | 1.04235e4 | 155.19463 50.0391 |
| 2 | 27.366 | BB    | 1.1553  | 1.04072e4 | 131.64528 49.9609 |

### HPLC chromatogram of chiral 3ra

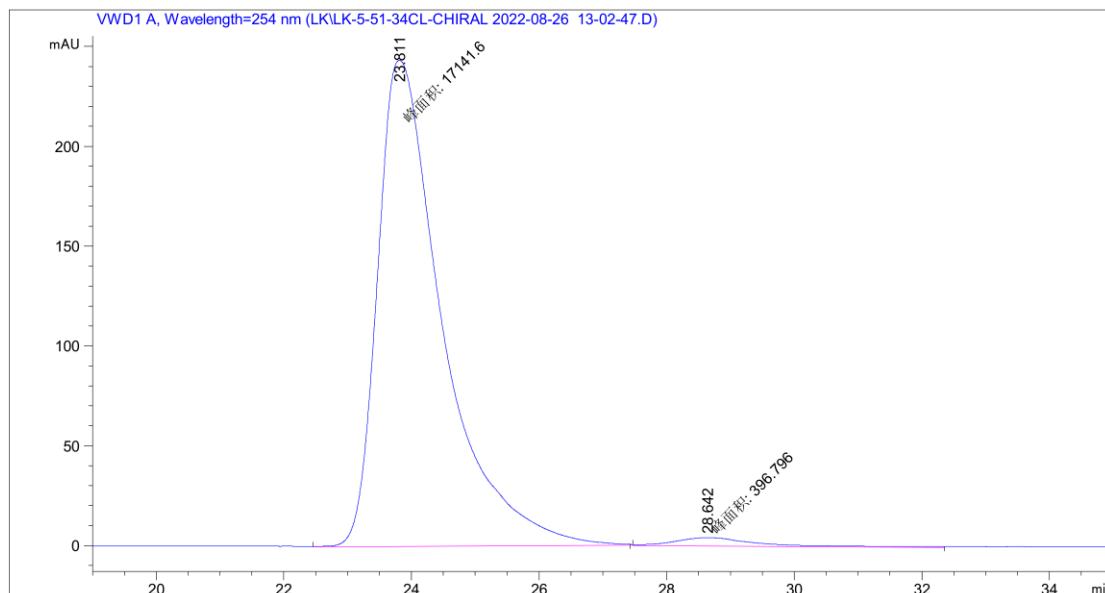

| # | [min]  | [min] | [mAU*s] | [mAU]     | %                 |
|---|--------|-------|---------|-----------|-------------------|
| 1 | 23.811 | MM    | 1.1735  | 1.71416e4 | 243.45654 97.7376 |
| 2 | 28.642 | MM    | 1.5680  | 396.79575 | 4.21756 2.2624    |

### HPLC chromatogram of racemic 3sa

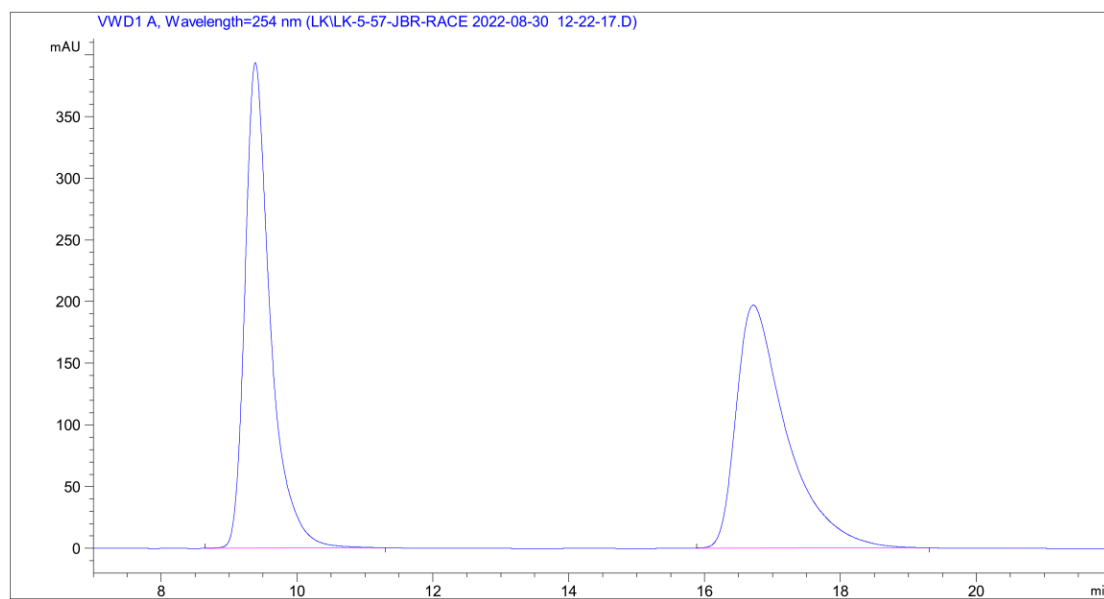

| # | [min]  | [min] | [mAU*s] | %         |         |
|---|--------|-------|---------|-----------|---------|
| 1 | 9.387  | BB    | 0.3873  | 1.02630e4 | 50.2641 |
| 2 | 16.718 | BB    | 0.7589  | 1.01552e4 | 49.7359 |

### HPLC chromatogram of chiral 3sa

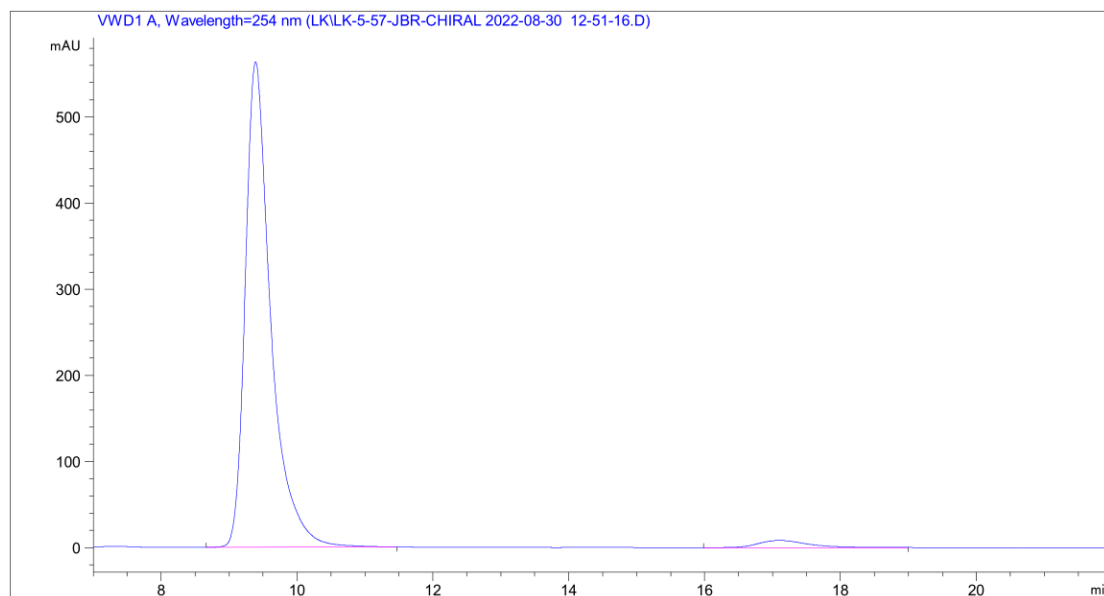

| # | [min]  | [min] | [mAU*s] | %         |         |
|---|--------|-------|---------|-----------|---------|
| 1 | 9.391  | BB    | 0.3884  | 1.47613e4 | 96.8764 |
| 2 | 17.103 | MM    | 0.9183  | 475.95520 | 3.1236  |

### HPLC chromatogram of racemic 3ta

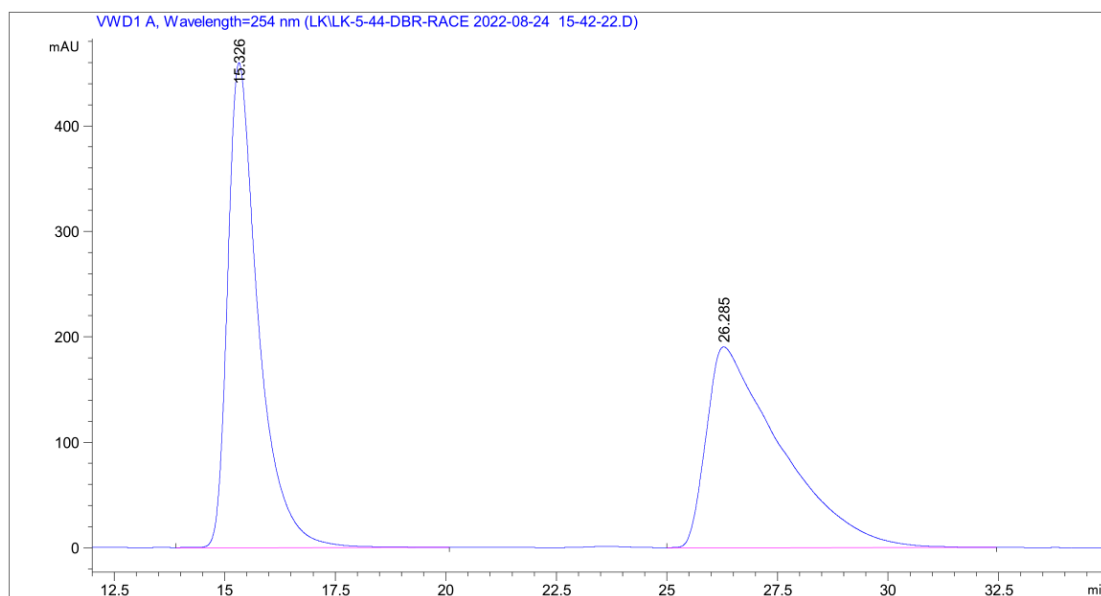

| # | [min]  | [min] | [mAU*s] | [mAU]     | %                 |
|---|--------|-------|---------|-----------|-------------------|
| 1 | 15.326 | BB    | 0.7129  | 2.21786e4 | 459.67737 50.0358 |
| 2 | 26.285 | BB    | 1.5522  | 2.21469e4 | 190.23903 49.9642 |

### HPLC chromatogram of chiral 3ta

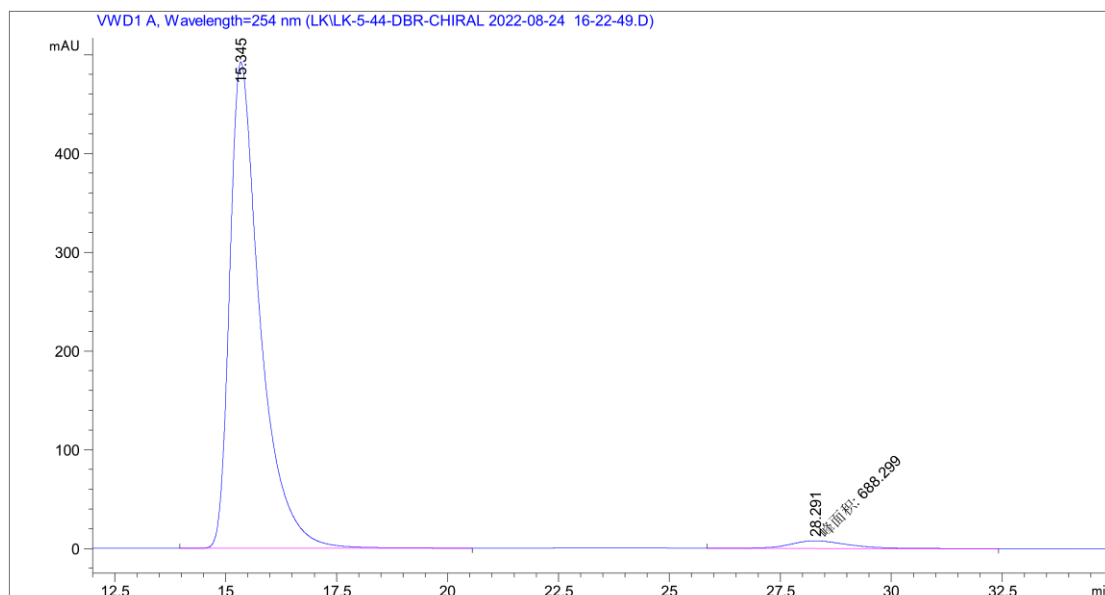

| # | [min]  | [min] | [mAU*s] | [mAU]     | %                 |
|---|--------|-------|---------|-----------|-------------------|
| 1 | 15.345 | BB    | 0.7076  | 2.35413e4 | 492.54547 97.1593 |
| 2 | 28.291 | MM    | 1.4994  | 688.29889 | 7.65094 2.8407    |

## HPLC chromatogram of racemic 3ua

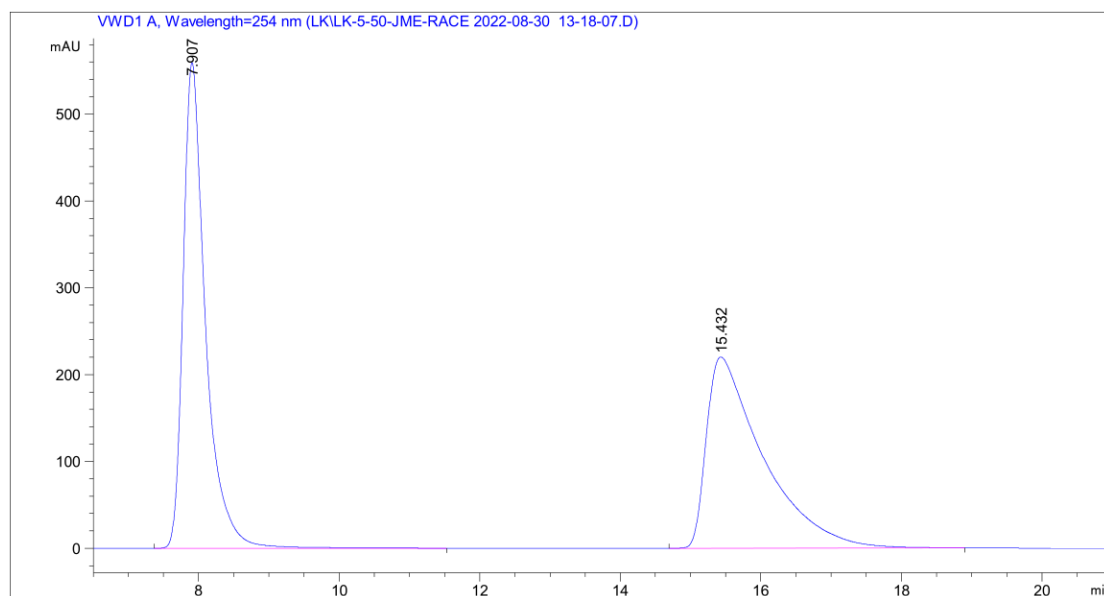

| # | [min]  | [min] | [mAU*s] | [mAU]     | %         |         |
|---|--------|-------|---------|-----------|-----------|---------|
| 1 | 7.907  | BB    | 0.3277  | 1.23604e4 | 559.49518 | 50.0558 |
| 2 | 15.432 | BB    | 0.7984  | 1.23329e4 | 220.21907 | 49.9442 |

## HPLC chromatogram of chiral 3ua

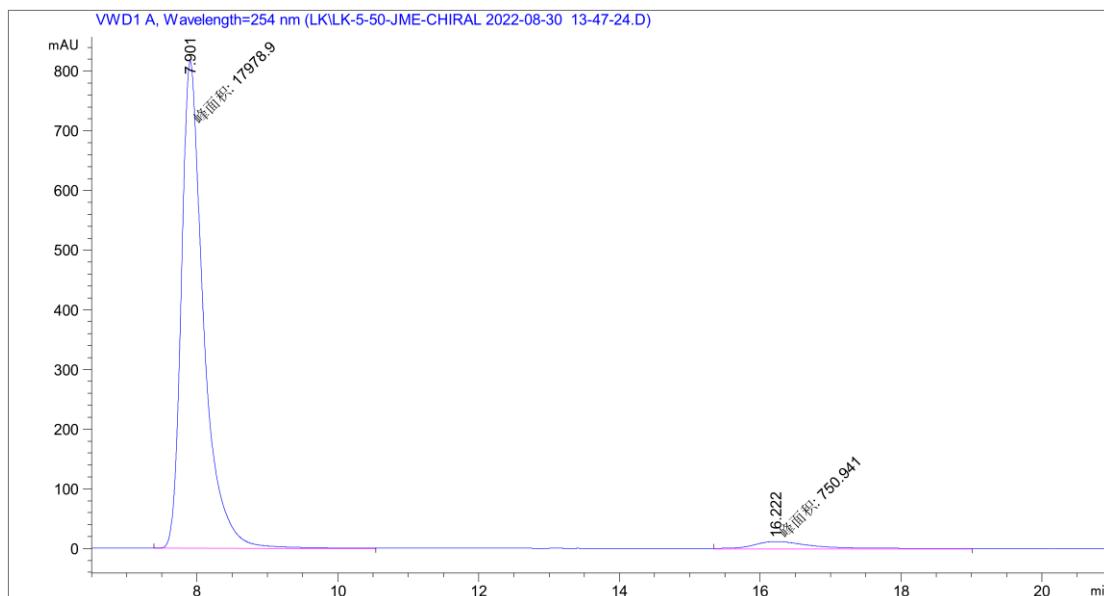

| # | [min]  | [min] | [mAU*s] | [mAU]     | %         |         |
|---|--------|-------|---------|-----------|-----------|---------|
| 1 | 7.901  | MM    | 0.3669  | 1.79789e4 | 816.79956 | 95.9907 |
| 2 | 16.222 | MM    | 1.0085  | 750.94104 | 12.41005  | 4.0093  |

### HPLC chromatogram of racemic 3va

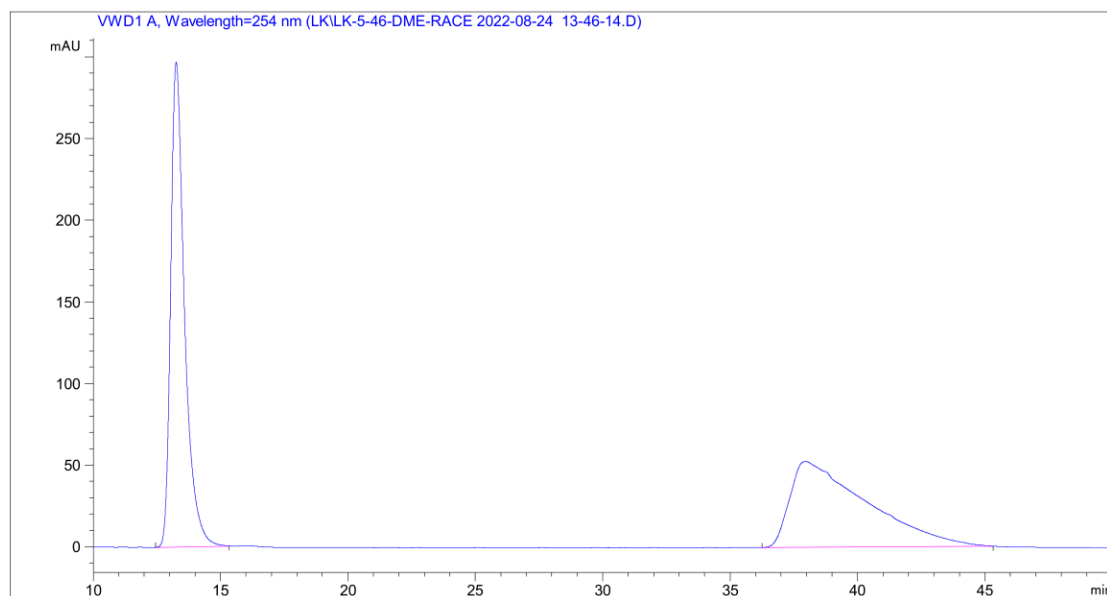

| # | [min]  | [min] | [mAU*s] | %         |         |
|---|--------|-------|---------|-----------|---------|
| 1 | 13.259 | BB    | 0.5638  | 1.12174e4 | 50.3572 |
| 2 | 37.952 | BB    | 2.6629  | 1.10582e4 | 49.6428 |

### HPLC chromatogram of chiral 3va

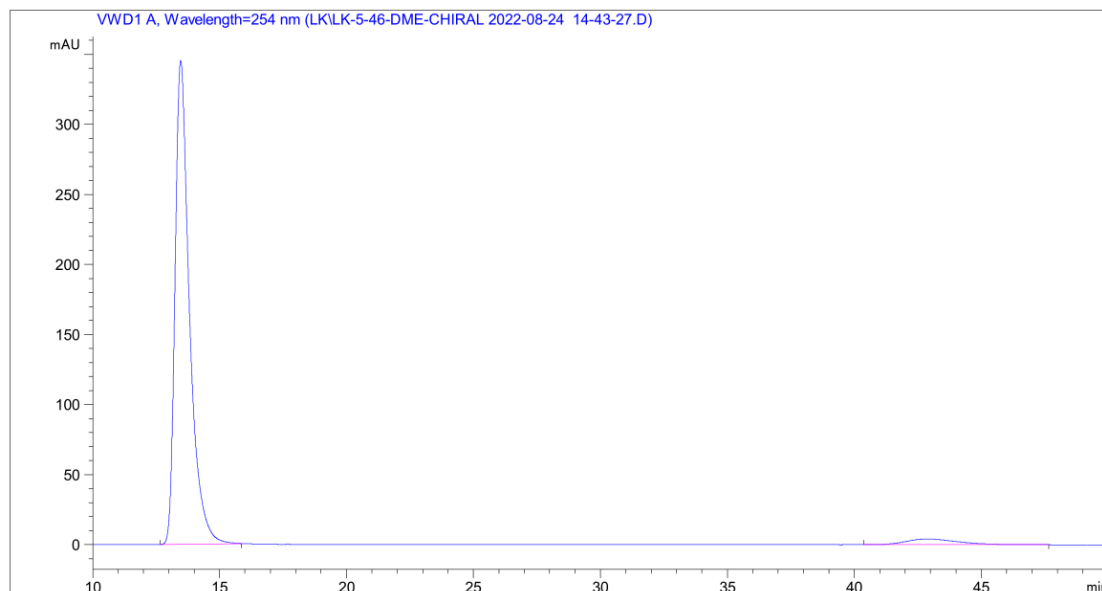

| # | [min]  | [min] | [mAU*s] | %         |         |
|---|--------|-------|---------|-----------|---------|
| 1 | 13.468 | BB    | 0.5889  | 1.36397e4 | 96.4101 |
| 2 | 42.881 | MM    | 2.1820  | 507.88211 | 3.5899  |



### HPLC chromatogram of racemic 3wa

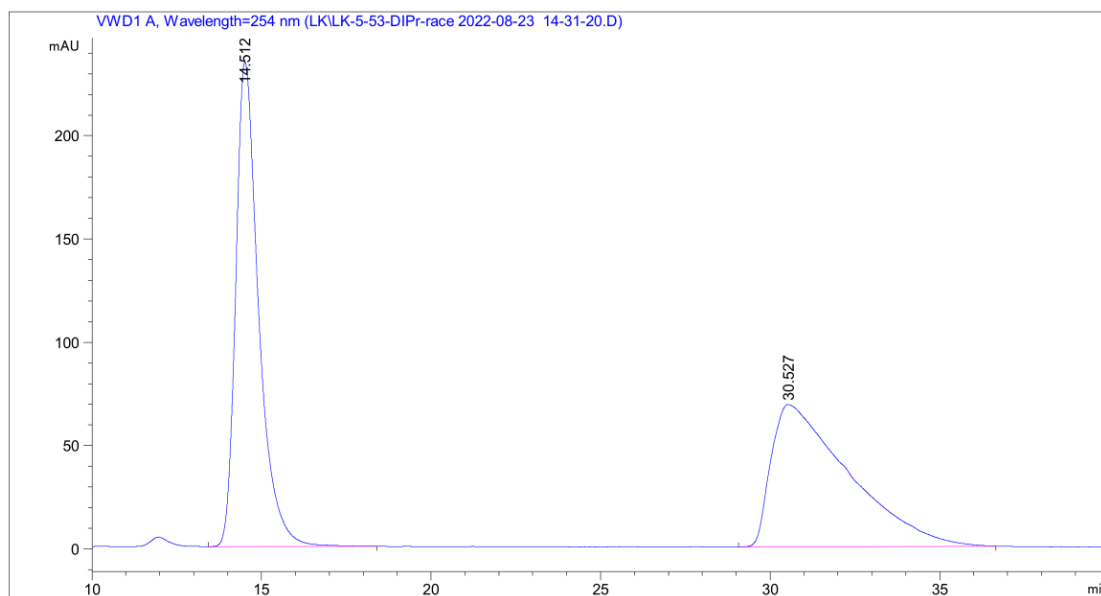

| # | [min]  | [min] | [mAU*s] | [mAU]     | %                 |
|---|--------|-------|---------|-----------|-------------------|
| 1 | 14.512 | BB    | 0.7007  | 1.10077e4 | 234.48201 50.2284 |
| 2 | 30.527 | BB    | 2.1645  | 1.09076e4 | 68.80553 49.7716  |

### HPLC chromatogram of chiral 3wa

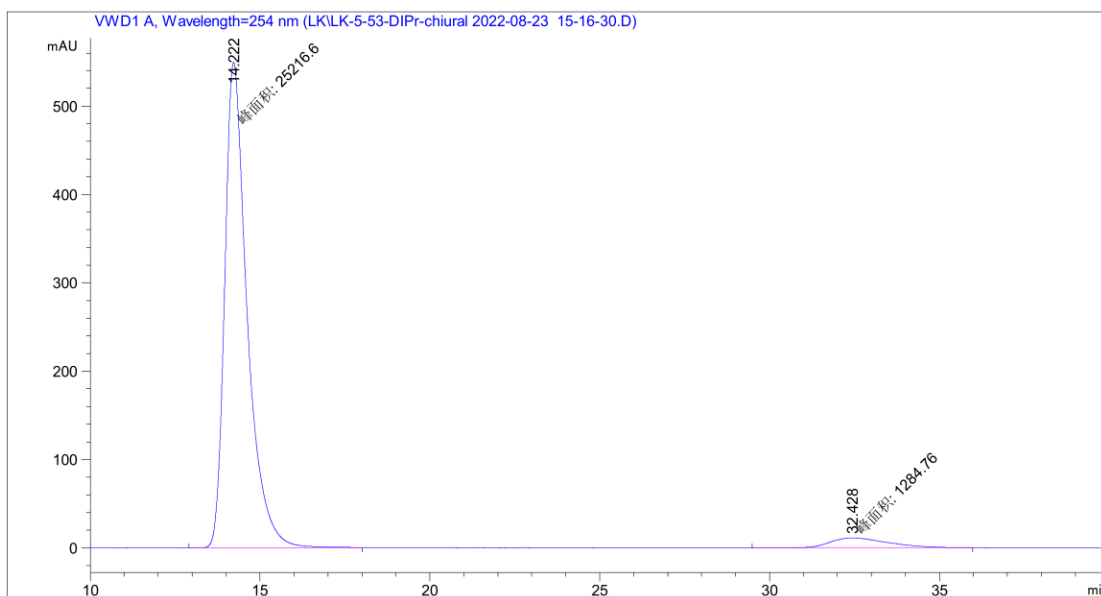

| # | [min]  | [min] | [mAU*s] | [mAU]      | %                 |
|---|--------|-------|---------|------------|-------------------|
| 1 | 14.222 | MM    | 0.7645  | 2.52166e4  | 549.77490 95.1521 |
| 2 | 32.428 | MM    | 1.9339  | 1284.76306 | 11.07205 4.8479   |

## HPLC chromatogram of racemic 3xa

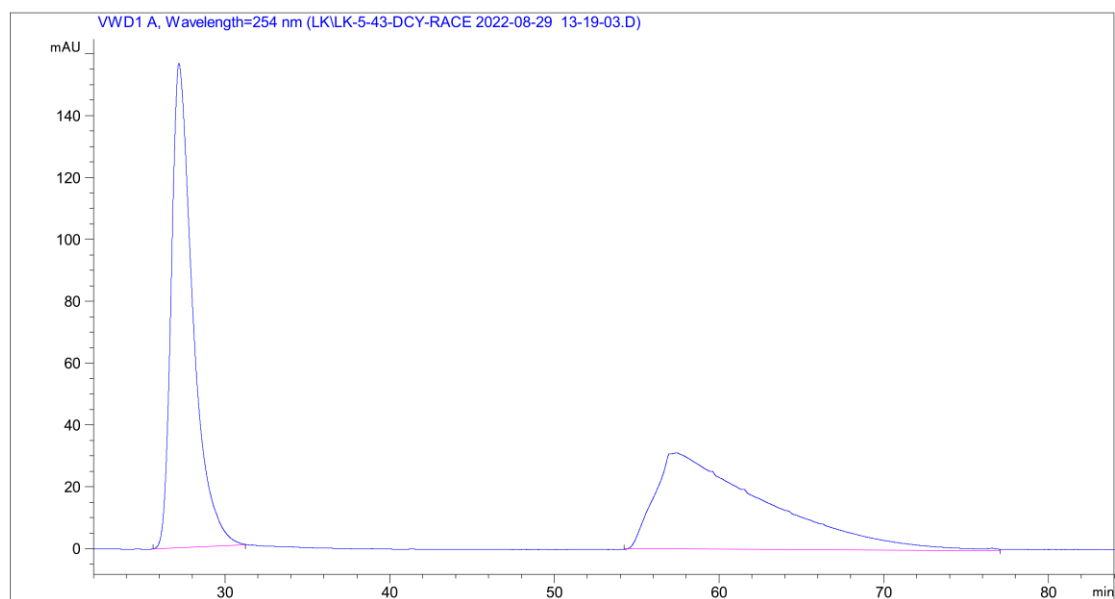

| # | [min]  | [min] | [mAU*s] | %         |         |
|---|--------|-------|---------|-----------|---------|
| 1 | 27.193 | BB    | 1.3514  | 1.42704e4 | 49.7911 |
| 2 | 57.432 | MM    | 7.7491  | 1.43901e4 | 50.2089 |

## HPLC chromatogram of chiral 3xa

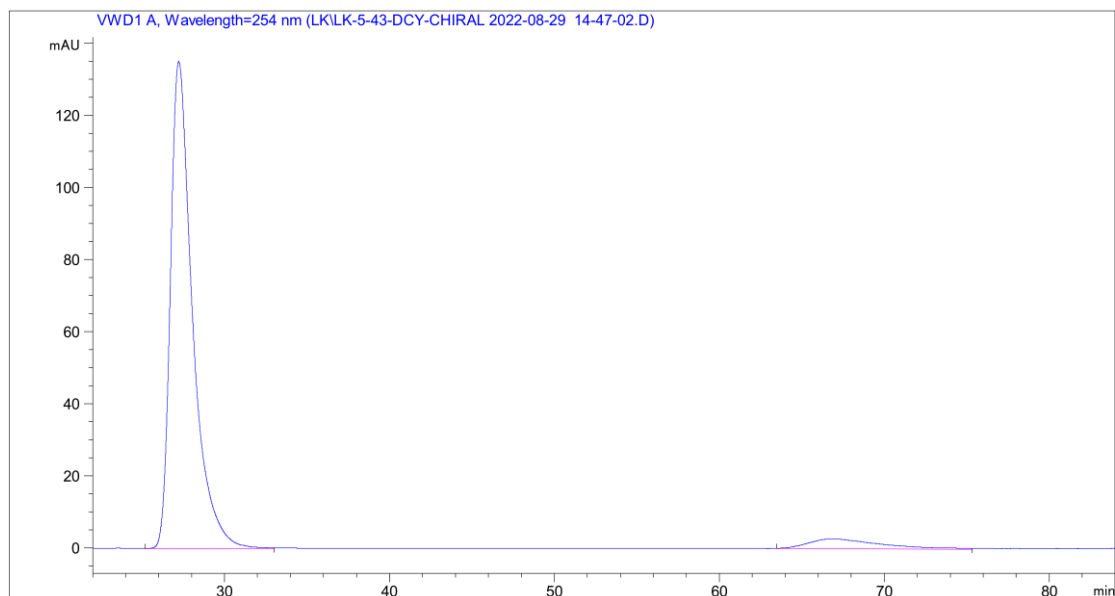

| # | [min]  | [min] | [mAU*s] | %         |         |
|---|--------|-------|---------|-----------|---------|
| 1 | 27.226 | MM    | 1.5546  | 1.26123e4 | 93.8706 |
| 2 | 66.873 | MM    | 5.1071  | 823.53241 | 6.1294  |

### HPLC chromatogram of racemic 3ya

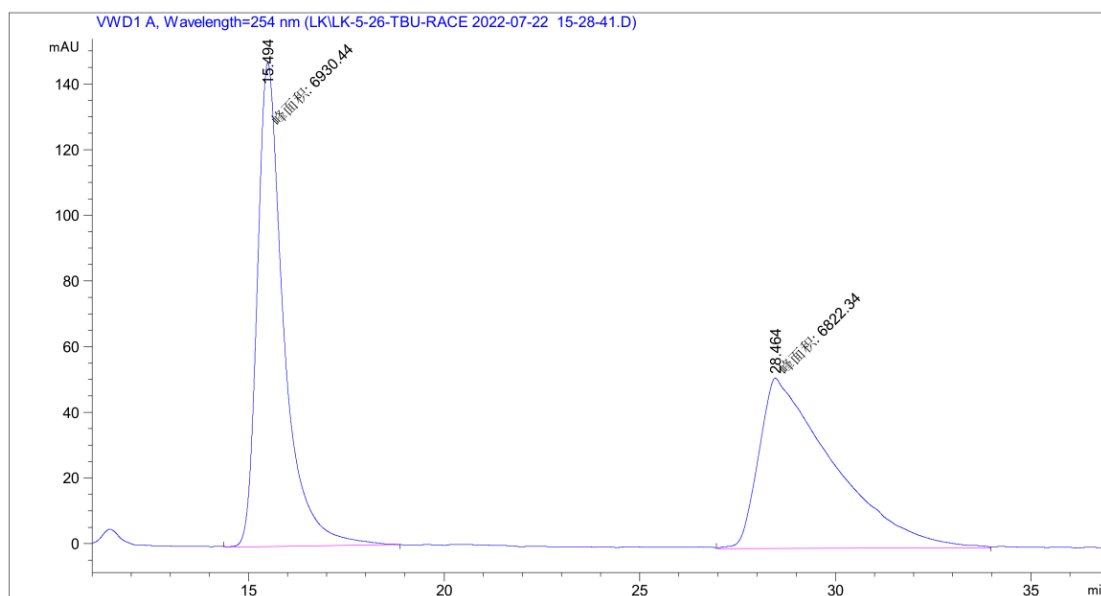

| # | [min]  | [min] | [mAU*s] | [mAU]      | %         |         |
|---|--------|-------|---------|------------|-----------|---------|
| 1 | 15.494 | MM    | 0.7844  | 6930.44287 | 147.25853 | 50.3930 |
| 2 | 28.464 | MM    | 2.1938  | 6822.34375 | 51.83133  | 49.6070 |

### HPLC chromatogram of chiral 3ya

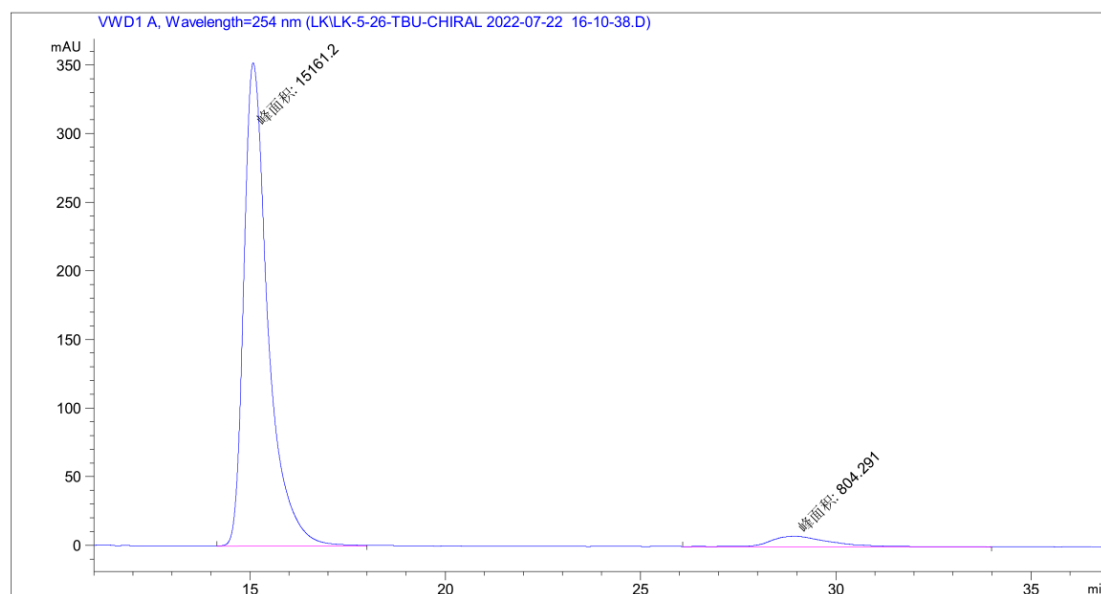

| # | [min]  | [min] | [mAU*s] | [mAU]     | %         |         |
|---|--------|-------|---------|-----------|-----------|---------|
| 1 | 15.084 | MM    | 0.7173  | 1.51612e4 | 352.28564 | 94.9623 |
| 2 | 28.945 | MM    | 1.7540  | 804.29095 | 7.64239   | 5.0377  |

## HPLC chromatogram of racemic 3za

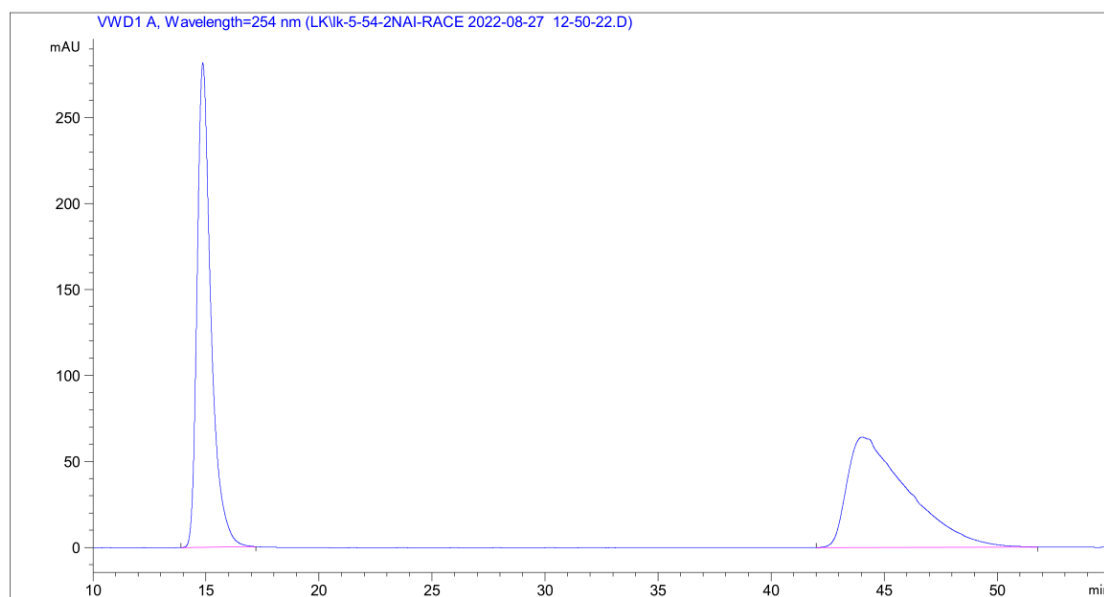

| # | [min]  | [min] | [mAU*s] | %         |         |
|---|--------|-------|---------|-----------|---------|
| 1 | 14.861 | BB    | 0.6409  | 1.20314e4 | 49.8891 |
| 2 | 44.034 | MM    | 3.1363  | 1.20849e4 | 50.1109 |

## HPLC chromatogram of chiral 3za

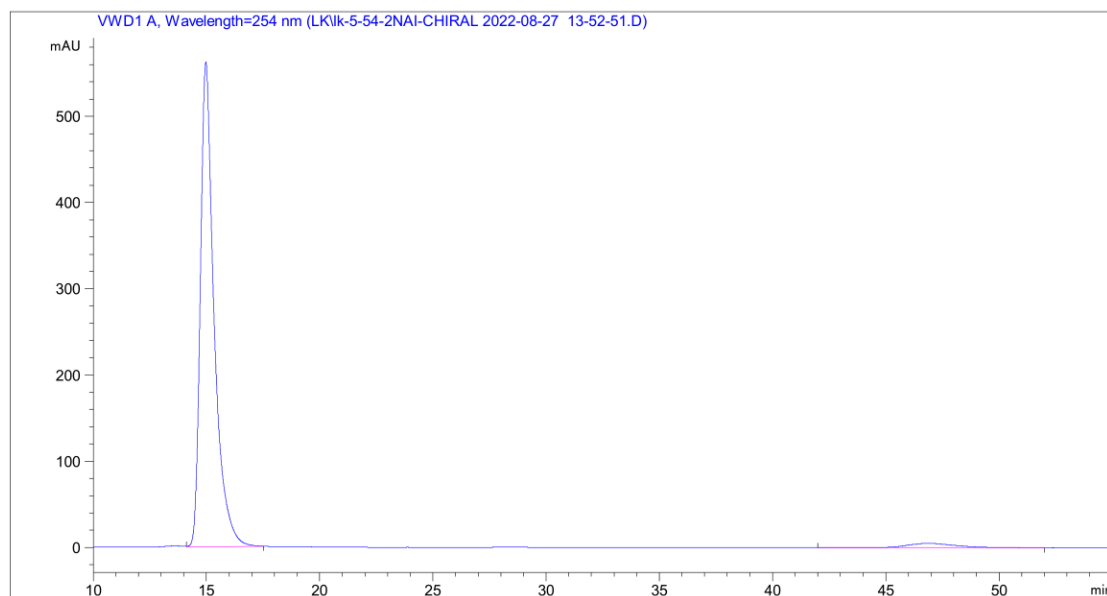

| # | [min]  | [min] | [mAU*s] | %         |         |
|---|--------|-------|---------|-----------|---------|
| 1 | 14.975 | VB    | 0.6170  | 2.36603e4 | 97.0652 |
| 2 | 46.770 | MM    | 2.4189  | 715.37592 | 2.9348  |

### HPLC chromatogram of racemic 3z'a

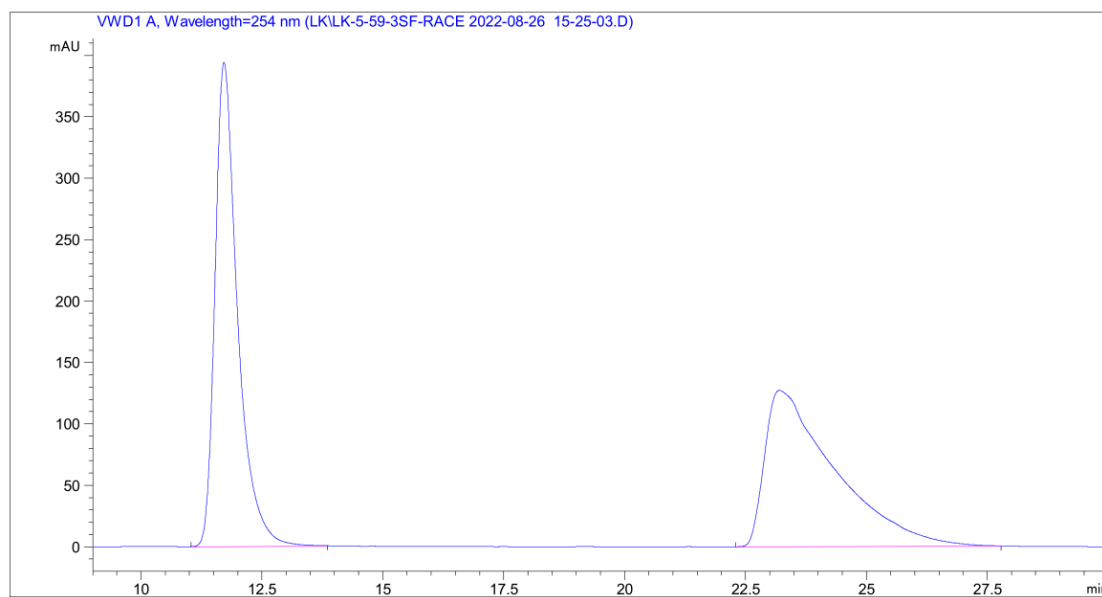

| # | [min]  | [min] | [mAU*s] | %         |         |
|---|--------|-------|---------|-----------|---------|
| 1 | 11.717 | BB    | 0.4856  | 1.28185e4 | 50.0608 |
| 2 | 23.204 | BB    | 1.3798  | 1.27874e4 | 49.9392 |

### HPLC chromatogram of chiral 3z'a

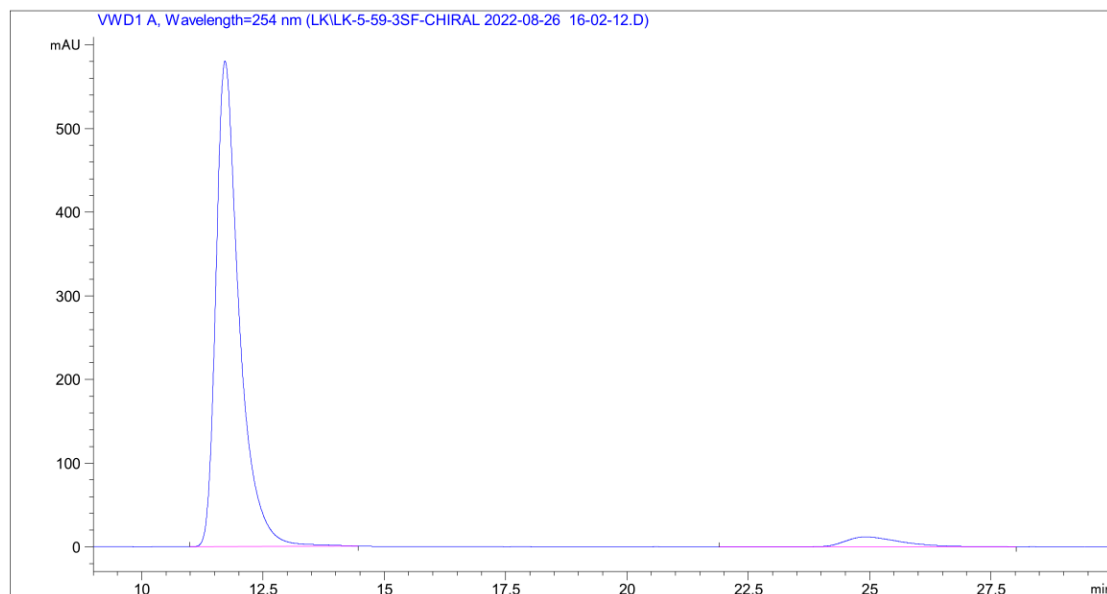

| # | [min]  | [min] | [mAU*s] | %         |         |
|---|--------|-------|---------|-----------|---------|
| 1 | 11.718 | MM    | 0.5561  | 1.93661e4 | 95.1845 |
| 2 | 24.921 | MM    | 1.3796  | 979.75549 | 4.8155  |

## HPLC chromatogram of racemic 3qb

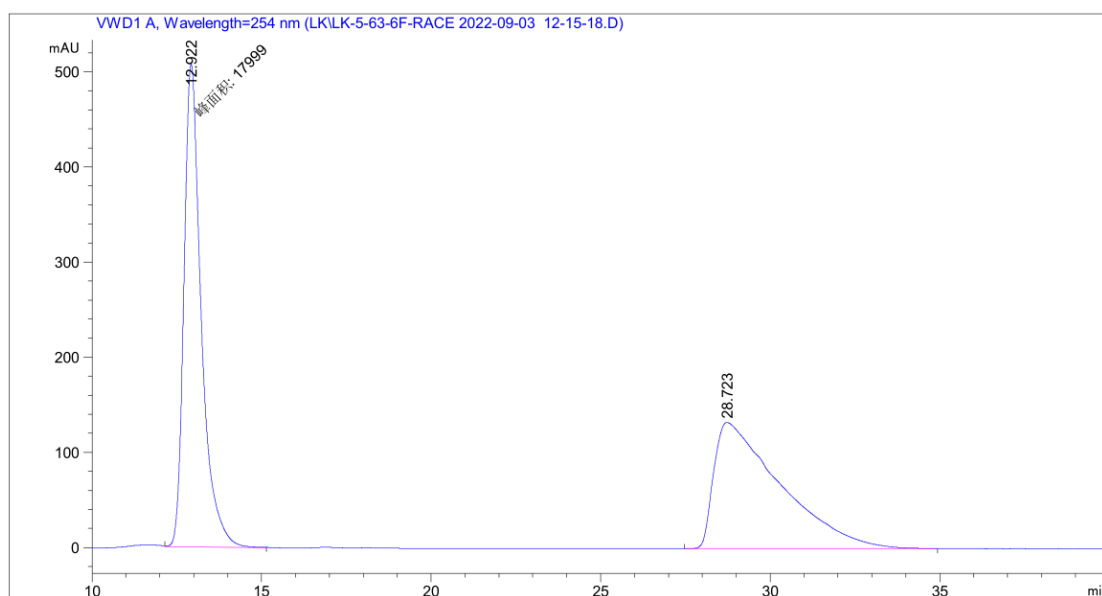

| # | [min]  | [min] | [mAU*s] | [mAU]     | %                 |
|---|--------|-------|---------|-----------|-------------------|
| 1 | 12.922 | MM    | 0.5909  | 1.79990e4 | 507.67300 49.9228 |
| 2 | 28.723 | BB    | 1.8281  | 1.80547e4 | 132.71982 50.0772 |

## HPLC chromatogram of chiral 3qb

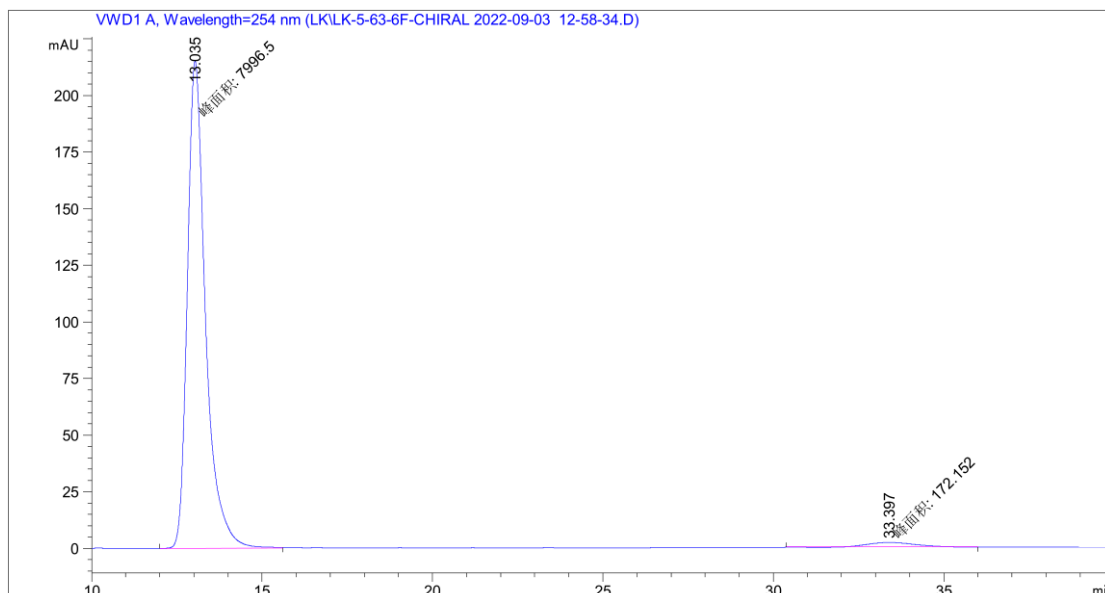

| # | [min]  | [min] | [mAU*s] | [mAU]      | %                 |
|---|--------|-------|---------|------------|-------------------|
| 1 | 13.035 | MM    | 0.6189  | 7996.50488 | 215.35405 97.8925 |
| 2 | 33.397 | MM    | 1.5323  | 172.15236  | 1.87247 2.1075    |

### HPLC chromatogram of racemic 3qc

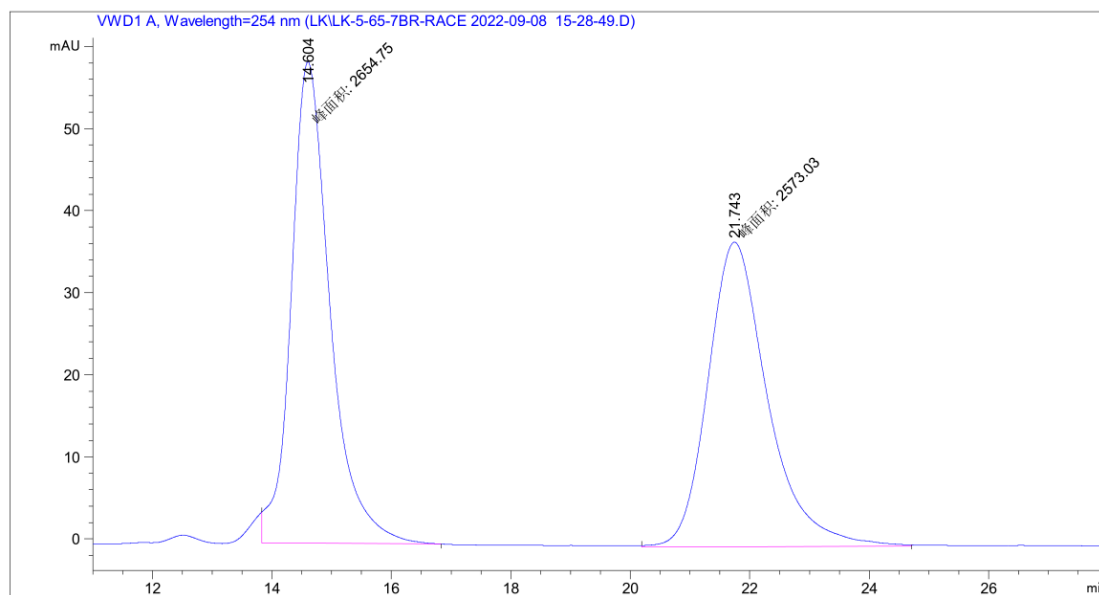

| # | [min]  | [min] | [mAU*s] | [mAU]      | %        |
|---|--------|-------|---------|------------|----------|
| 1 | 14.604 | MM    | 0.7544  | 2654.74976 | 58.64896 |
| 2 | 21.743 | MM    | 1.1562  | 2573.02856 | 37.09153 |

### HPLC chromatogram of chiral 3qc

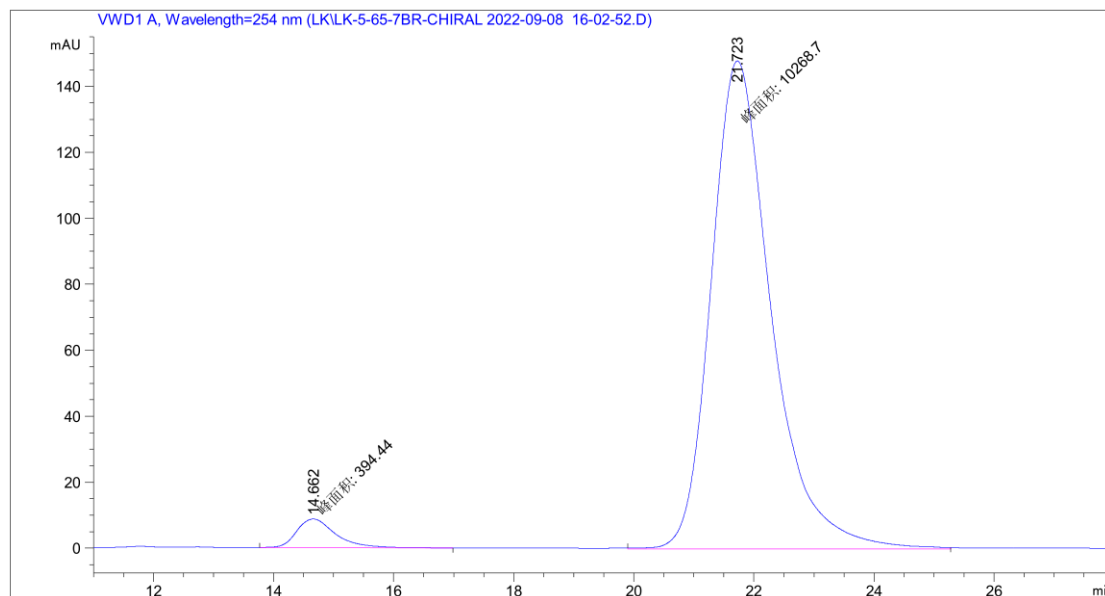

| # | [min]  | [min] | [mAU*s] | [mAU]     | %         |
|---|--------|-------|---------|-----------|-----------|
| 1 | 14.662 | MM    | 0.7575  | 394.44040 | 8.67807   |
| 2 | 21.723 | MM    | 1.1570  | 1.02687e4 | 147.91916 |

## HPLC chromatogram of racemic 3qd

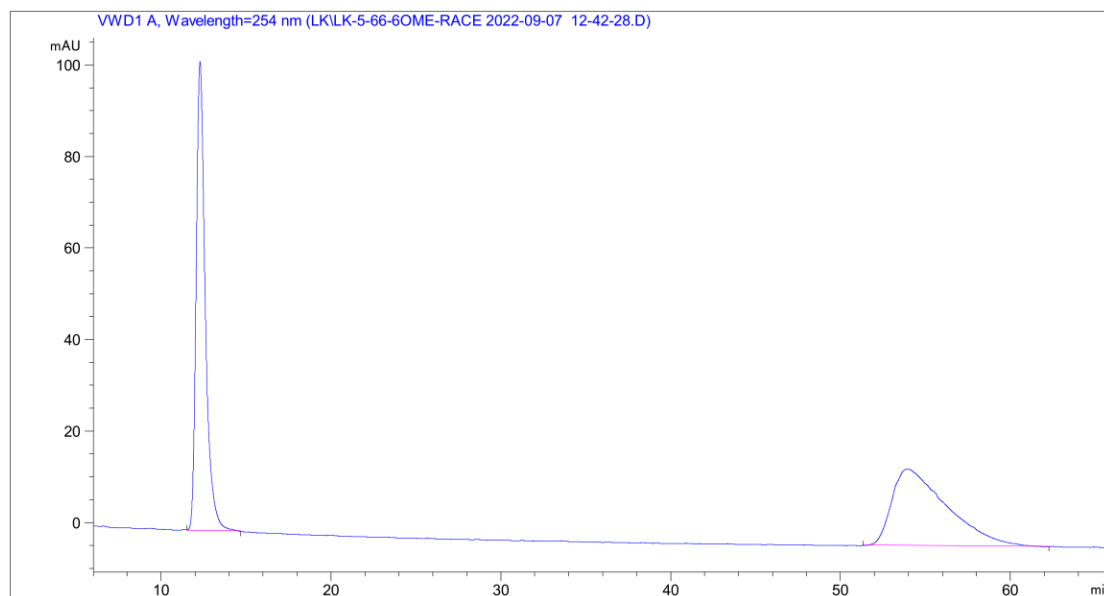

| # | [min]  | [min] | [mAU*s]           | %       |
|---|--------|-------|-------------------|---------|
| 1 | 12.292 | MM    | 0.6190 3800.56201 | 50.6241 |
| 2 | 53.978 | MM    | 3.7083 3706.85840 | 49.3759 |

## HPLC chromatogram of chiral 3qd

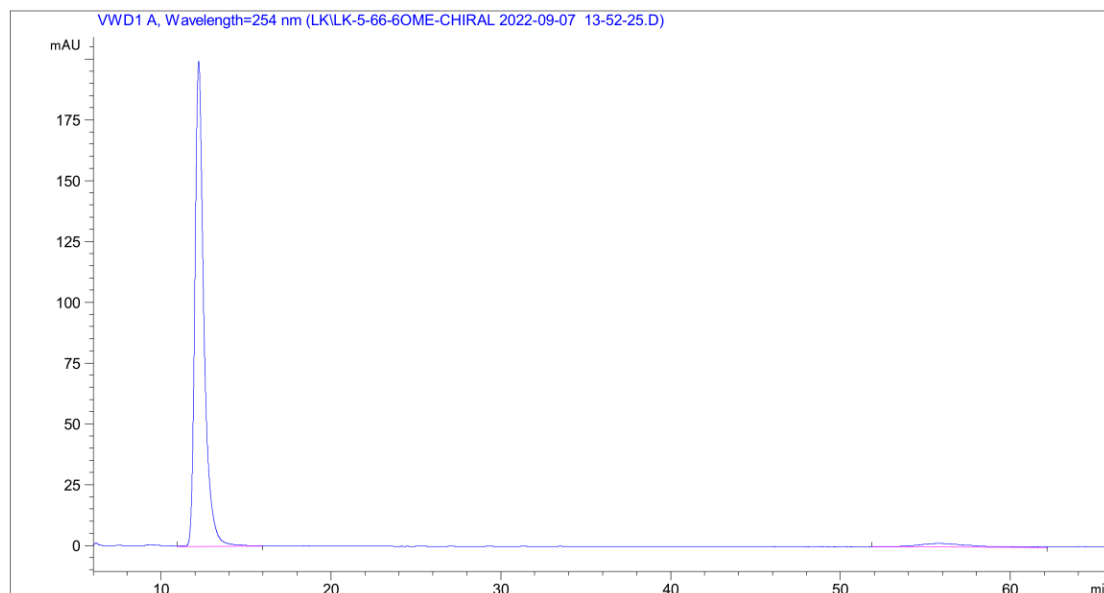

| # | [min]  | [min] | [mAU*s]           | %       |
|---|--------|-------|-------------------|---------|
| 1 | 12.217 | MM    | 0.6147 7357.34717 | 96.2331 |
| 2 | 55.734 | MM    | 3.3545 287.99057  | 3.7669  |



### HPLC chromatogram of racemic 3qe

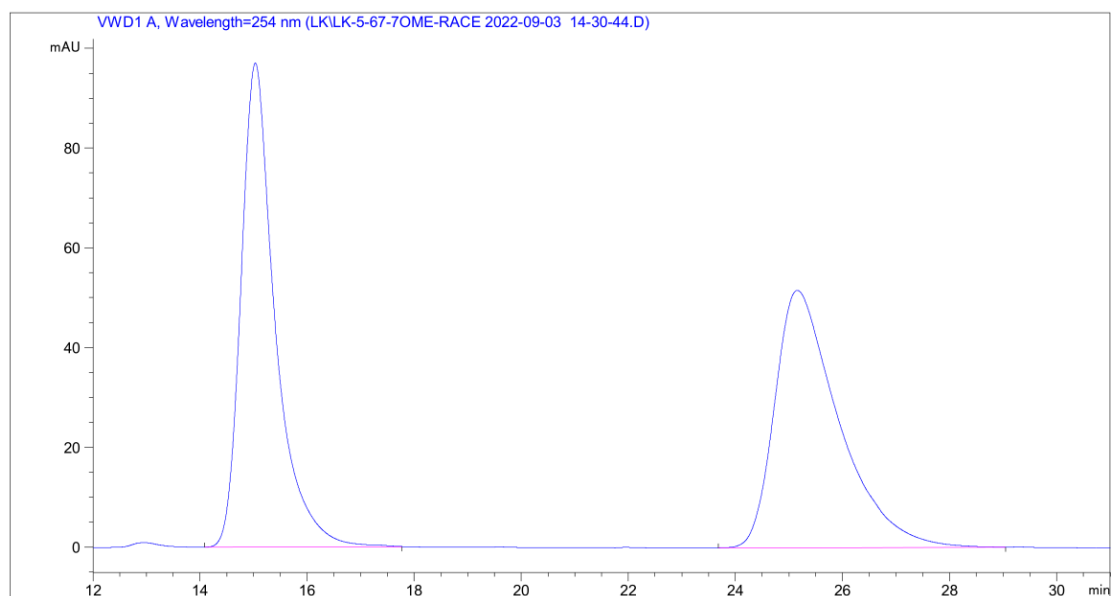

| # | [min]  | [min] | [mAU*s]           | %       |
|---|--------|-------|-------------------|---------|
| 1 | 15.033 | MM    | 0.7379 4298.45361 | 50.0238 |
| 2 | 25.154 | MM    | 1.3865 4294.36523 | 49.9762 |

### HPLC chromatogram of chiral 3qe

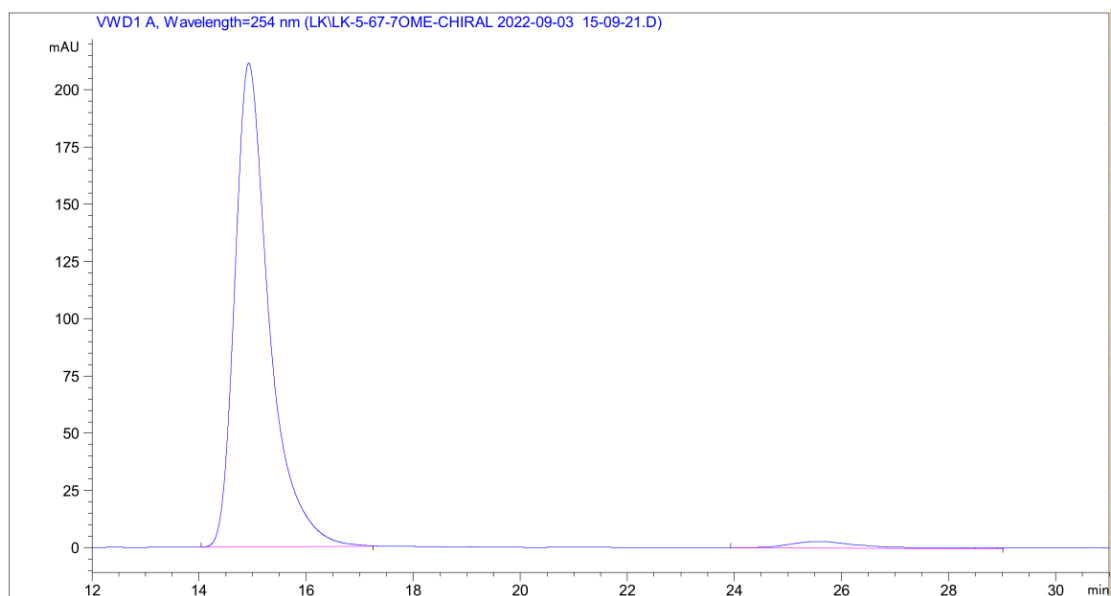

| # | [min]  | [min] | [mAU*s]           | %       |
|---|--------|-------|-------------------|---------|
| 1 | 14.927 | BB    | 0.6656 9411.11230 | 97.0361 |
| 2 | 25.568 | MM    | 1.6596 287.45319  | 2.9639  |

## HPLC chromatogram of racemic 3qf

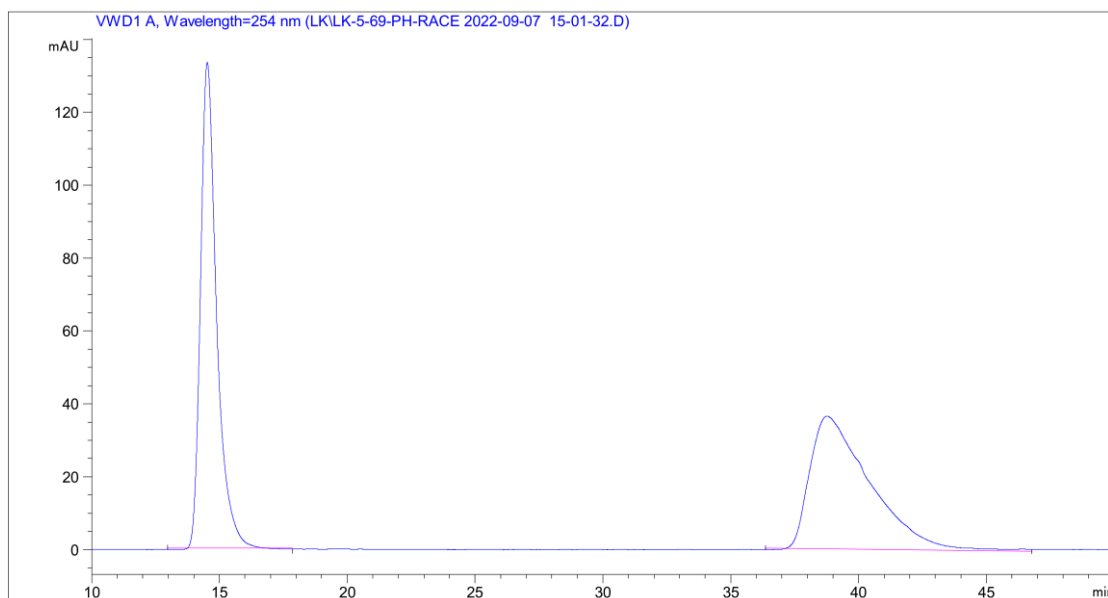

| # | [min]  | [min]     | [mAU*s]    | %       |
|---|--------|-----------|------------|---------|
| 1 | 14.526 | MM 0.7261 | 5803.68066 | 49.5605 |
| 2 | 38.768 | MM 2.7109 | 5906.61914 | 50.4395 |

## HPLC chromatogram of chiral 3qf

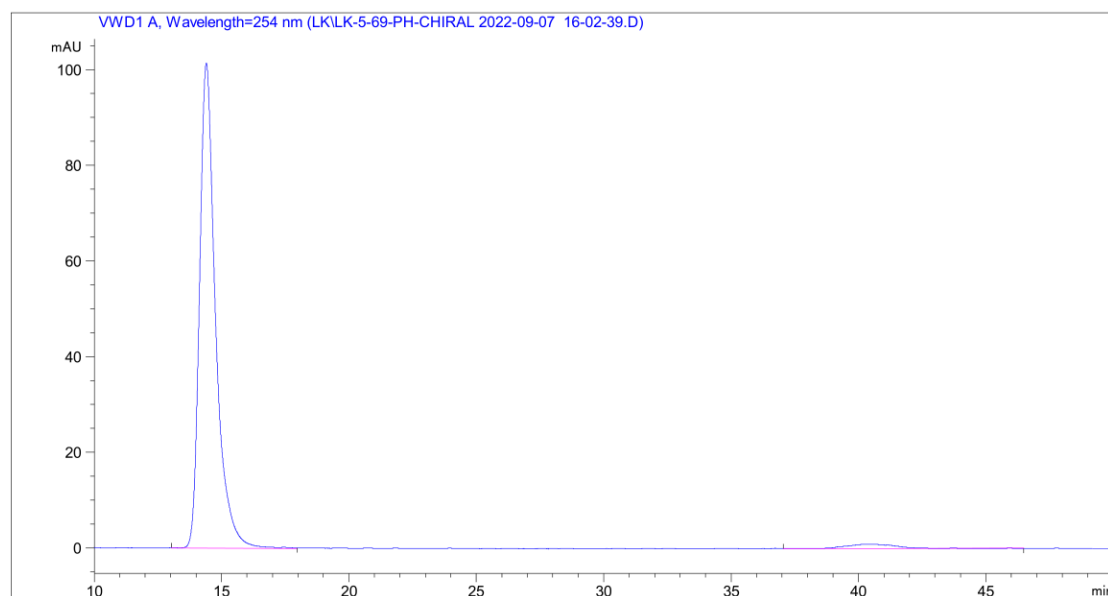

| # | [min]  | [min]     | [mAU*s]    | %       |
|---|--------|-----------|------------|---------|
| 1 | 14.402 | MM 0.7270 | 4421.93359 | 97.1068 |
| 2 | 40.346 | MM 2.3291 | 131.74649  | 2.8932  |

## HPLC chromatogram of racemic 3qg

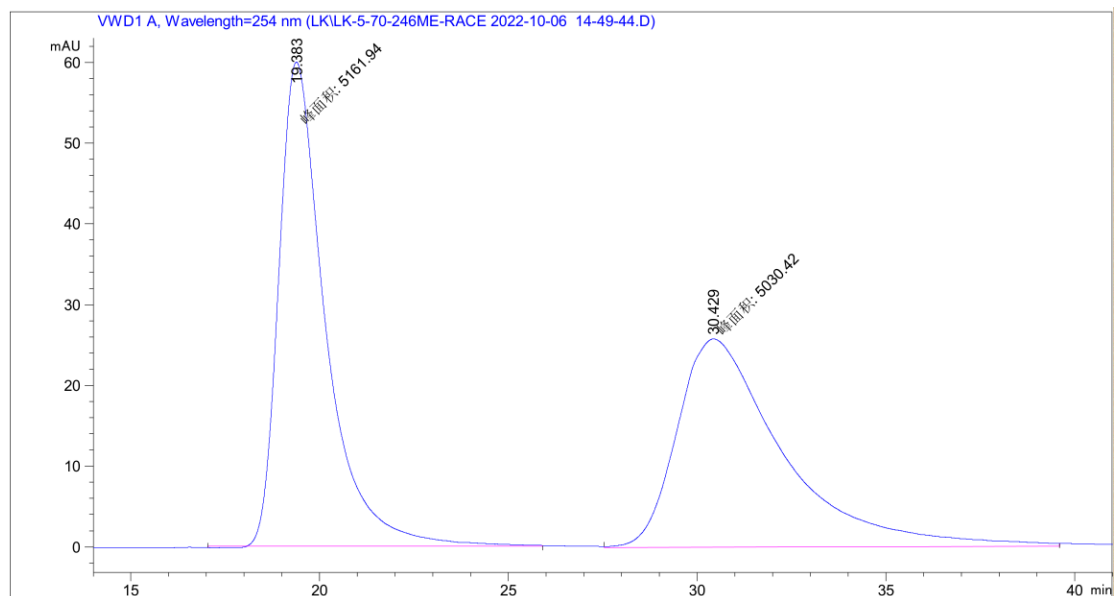

| # | [min]  | [min]     | [mAU*s]    | [mAU]    | %       |
|---|--------|-----------|------------|----------|---------|
| 1 | 19.383 | MM 1.4354 | 5161.94287 | 59.93750 | 50.6452 |
| 2 | 30.429 | MM 3.2496 | 5030.42432 | 25.80011 | 49.3548 |

## HPLC chromatogram of chiral 3qg

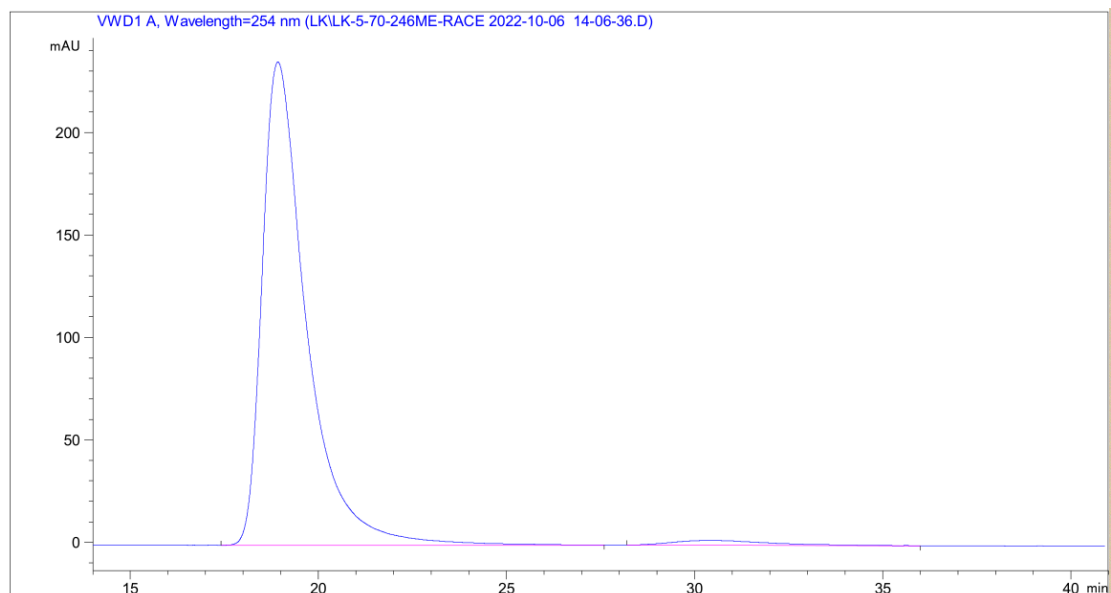

| # | [min]  | [min]     | [mAU*s]   | %       |
|---|--------|-----------|-----------|---------|
| 1 | 18.923 | MM 1.3653 | 1.93155e4 | 97.7685 |
| 2 | 30.552 | MM 3.1344 | 440.87170 | 2.2315  |

## HPLC chromatogram of racemic 3qh

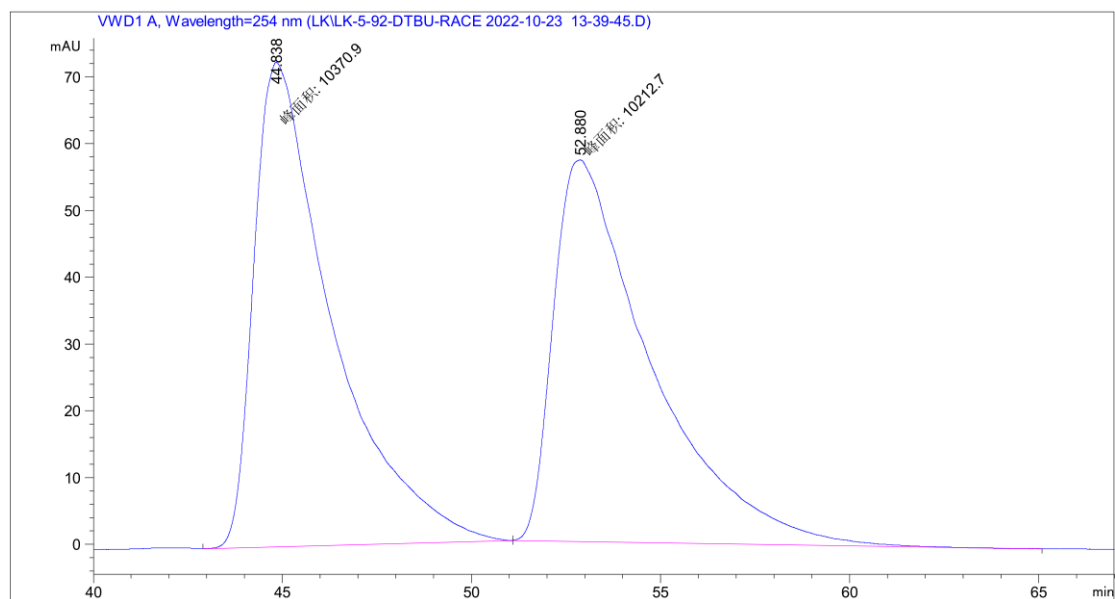

| # | [min]  | [min]     | [mAU*s]   | [mAU]    | %       |
|---|--------|-----------|-----------|----------|---------|
| 1 | 44.838 | MM 2.3825 | 1.03709e4 | 72.55044 | 50.3843 |
| 2 | 52.880 | MM 2.9784 | 1.02127e4 | 57.14888 | 49.6157 |

## HPLC chromatogram of chiral 3qh

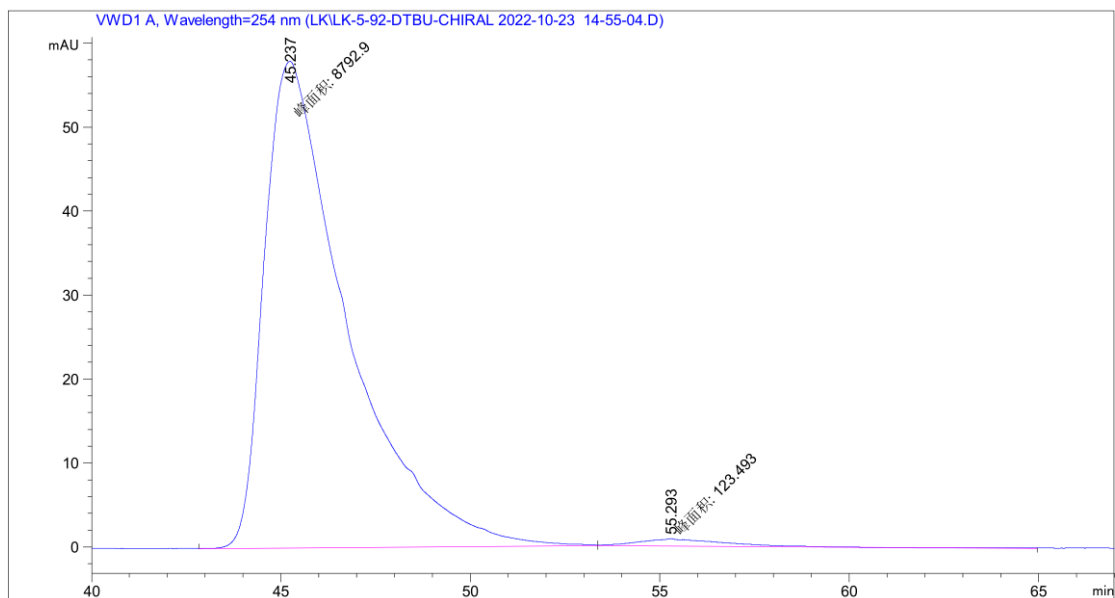

| # | [min]  | [min]     | [mAU*s]    | [mAU]      | %       |
|---|--------|-----------|------------|------------|---------|
| 1 | 45.237 | MM 2.5289 | 8792.89746 | 57.95037   | 98.6150 |
| 2 | 55.293 | MM 2.4472 | 123.49287  | 8.41044e-1 | 1.3850  |

## HPLC chromatogram of racemic 3qi

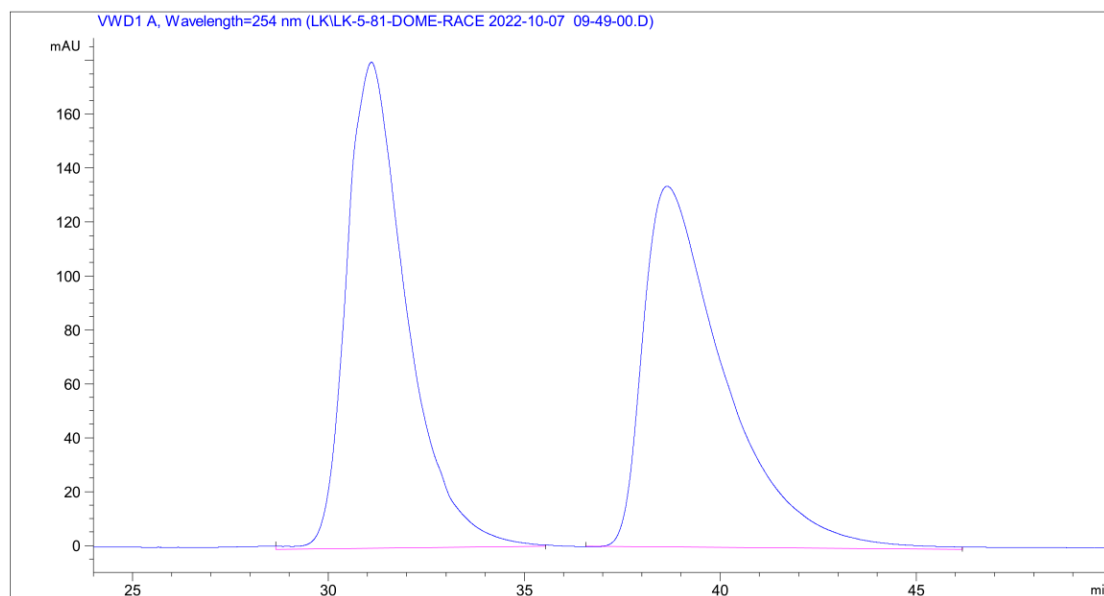

| # | [min]  | [min]     | [mAU*s]   | %       |
|---|--------|-----------|-----------|---------|
| 1 | 31.099 | MM 1.7772 | 1.92344e4 | 49.9328 |
| 2 | 38.643 | MM 2.4022 | 1.92861e4 | 50.0672 |

## HPLC chromatogram of chiral 3qi

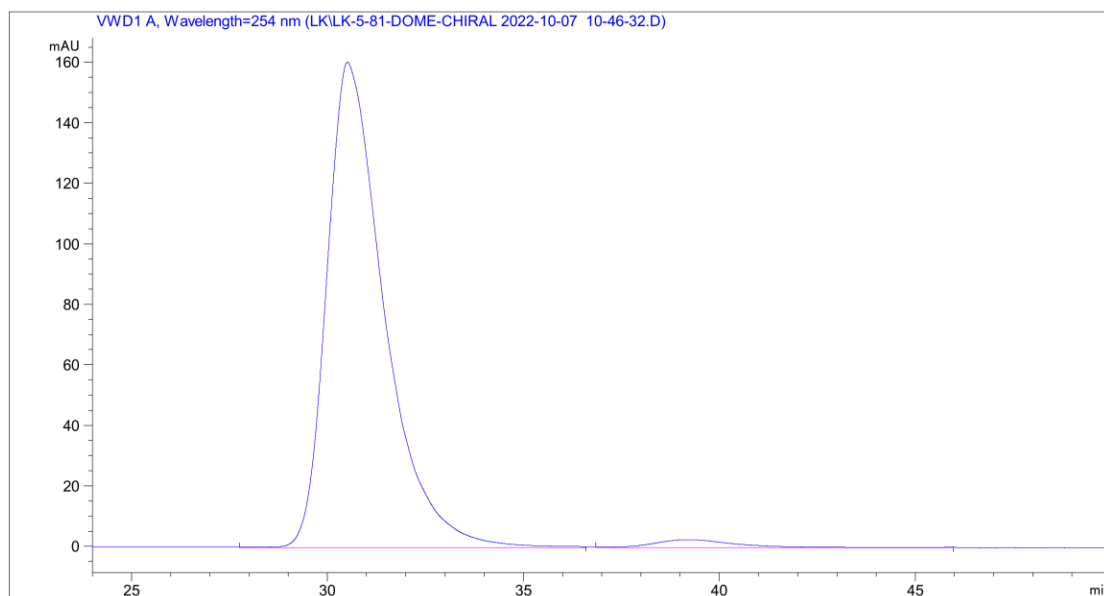

| # | [min]  | [min]     | [mAU*s]   | %       |
|---|--------|-----------|-----------|---------|
| 1 | 30.510 | MM 1.6962 | 1.63254e4 | 97.7763 |
| 2 | 39.167 | MM 2.3891 | 371.28946 | 2.2237  |

## HPLC chromatogram of racemic 6aa

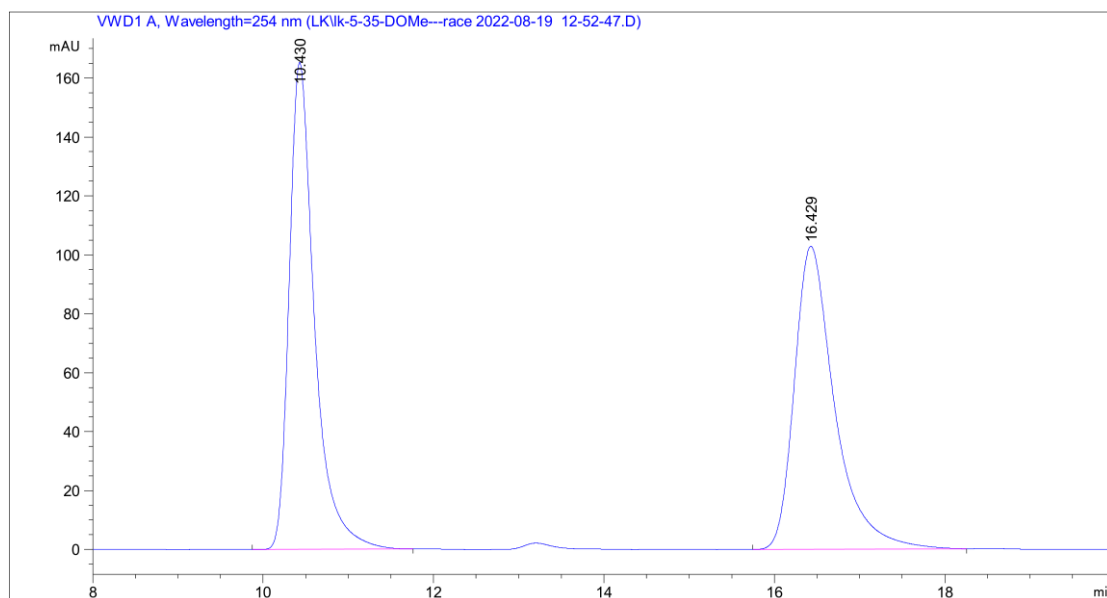

| # | [min]  | [min] | [mAU*s] | [mAU]      | %         |         |
|---|--------|-------|---------|------------|-----------|---------|
| 1 | 10.430 | BB    | 0.3099  | 3412.05347 | 165.27567 | 50.2034 |
| 2 | 16.429 | BB    | 0.4940  | 3384.41138 | 102.83238 | 49.7966 |

## HPLC chromatogram of chiral 6aa

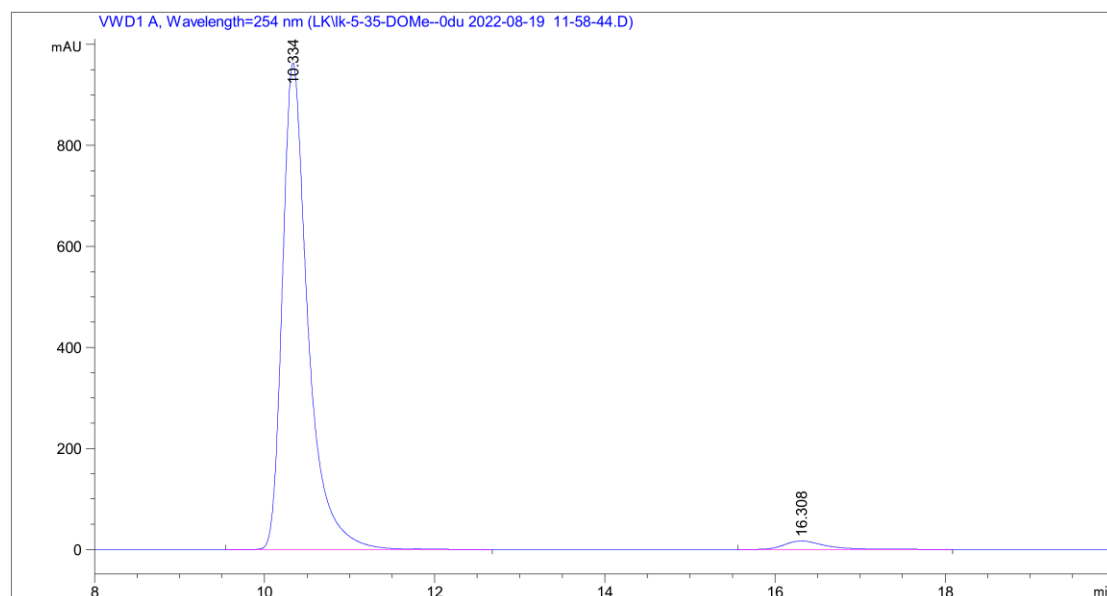

| # | [min]  | [min] | [mAU*s] | [mAU]     | %         |         |
|---|--------|-------|---------|-----------|-----------|---------|
| 1 | 10.334 | BV R  | 0.3126  | 2.01078e4 | 963.15576 | 97.3010 |
| 2 | 16.308 | BB    | 0.4970  | 557.75970 | 16.77070  | 2.6990  |

## HPLC chromatogram of racemic 6ba

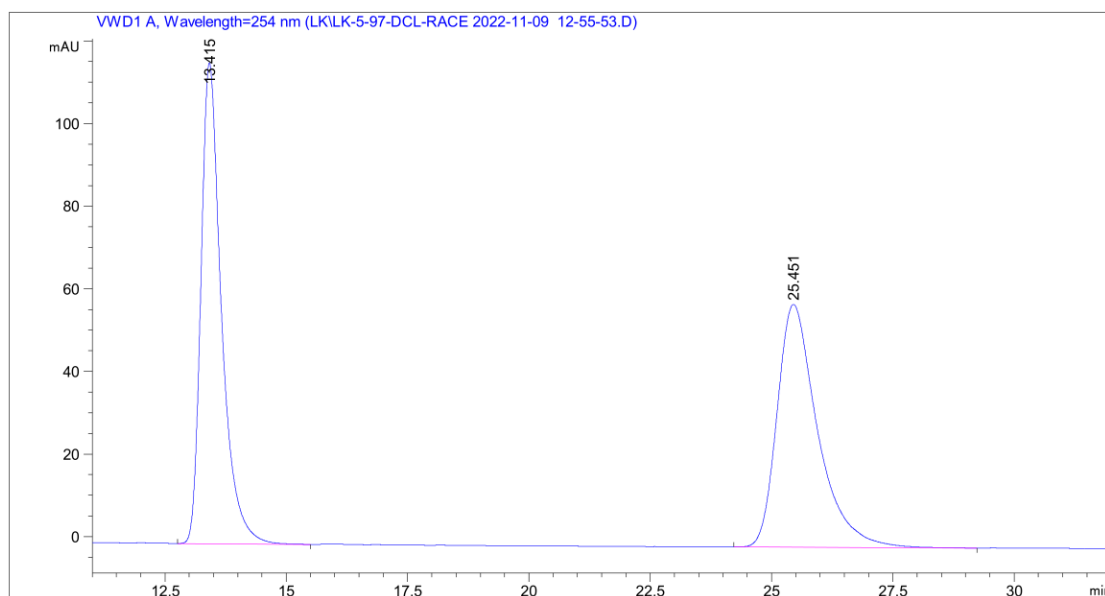

| # | [min]  | [min] | [mAU*s] | [mAU]      | %         |         |
|---|--------|-------|---------|------------|-----------|---------|
| 1 | 13.415 | BB    | 0.4378  | 3409.54370 | 116.38366 | 50.0047 |
| 2 | 25.451 | BB    | 0.8644  | 3408.90674 | 58.80105  | 49.9953 |

## HPLC chromatogram of chiral 6ba

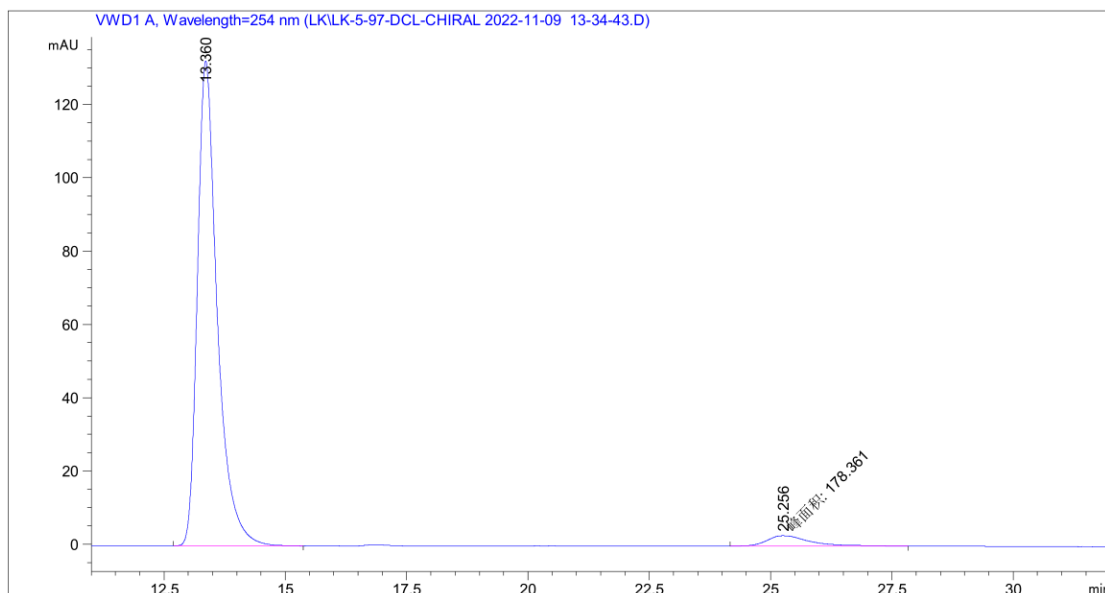

| # | [min]  | [min] | [mAU*s] | [mAU]      | %         |         |
|---|--------|-------|---------|------------|-----------|---------|
| 1 | 13.360 | BB    | 0.4251  | 3763.02344 | 132.20900 | 95.4747 |
| 2 | 25.256 | MM    | 1.0438  | 178.36073  | 2.84792   | 4.5253  |

## HPLC chromatogram of racemic 6ca

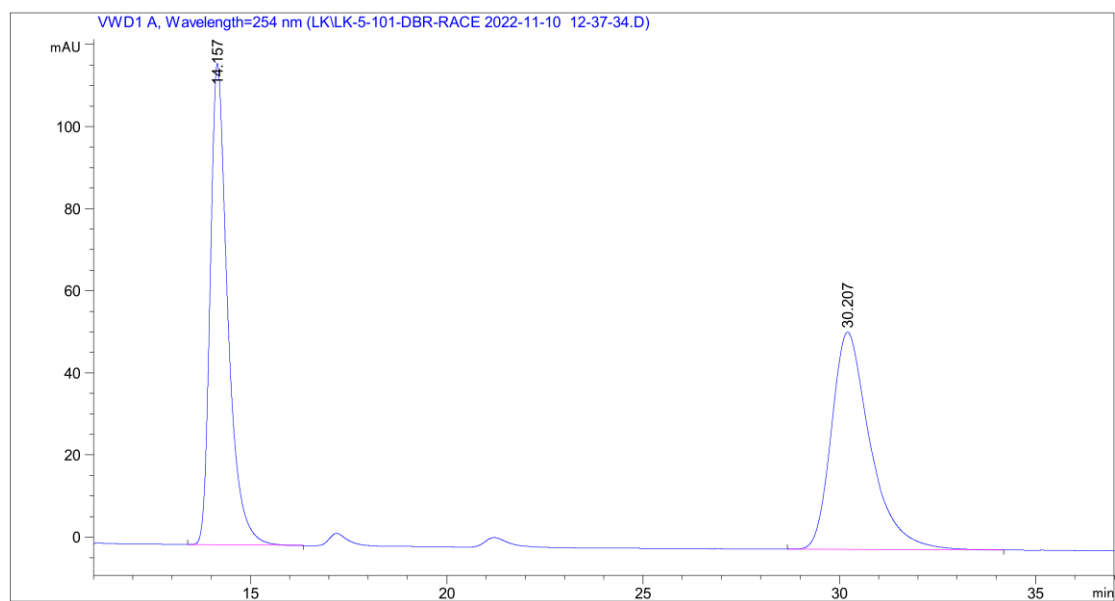

| # | [min]  | [min] | [mAU*s] | [mAU]      | %         |         |
|---|--------|-------|---------|------------|-----------|---------|
| 1 | 14.157 | BB    | 0.4642  | 3640.86011 | 117.27529 | 50.0305 |
| 2 | 30.207 | BB    | 1.0323  | 3636.42603 | 52.94779  | 49.9695 |

## HPLC chromatogram of chiral 6ca

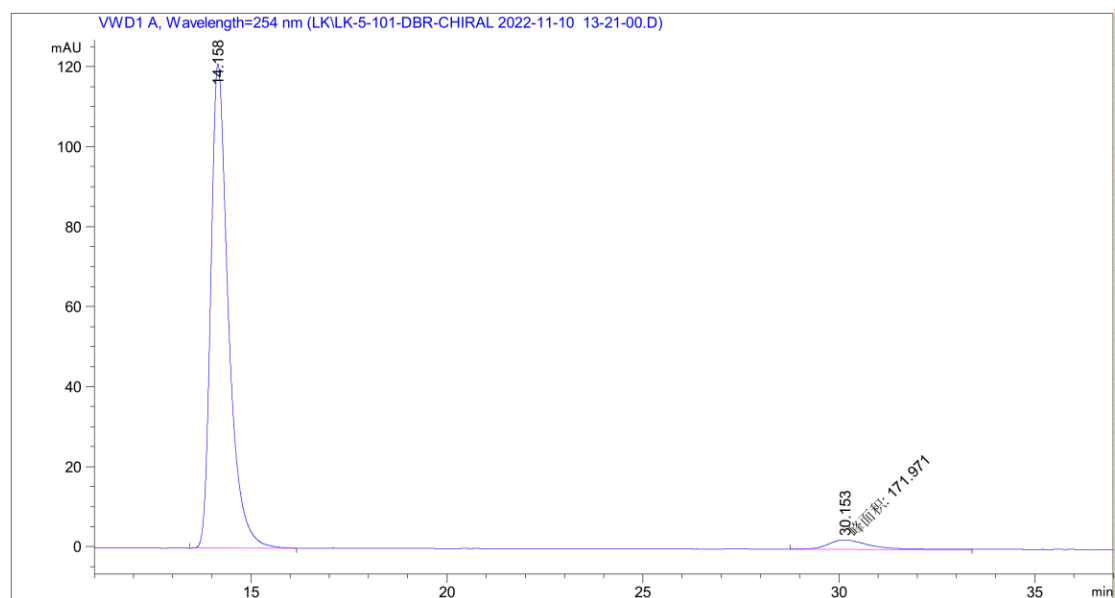

| # | [min]  | [min] | [mAU*s] | [mAU]      | %         |         |
|---|--------|-------|---------|------------|-----------|---------|
| 1 | 14.158 | BB    | 0.4668  | 3764.79956 | 121.05619 | 95.6317 |
| 2 | 30.153 | MM    | 1.2085  | 171.97060  | 2.37162   | 4.3683  |



## HPLC chromatogram of racemic 6da

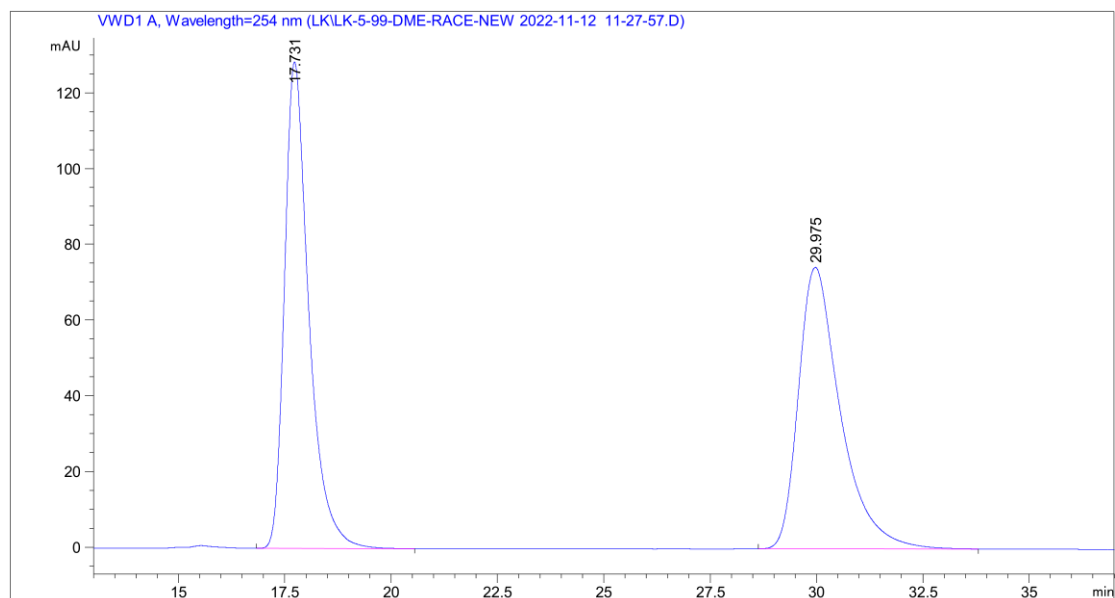

| # | [min]  | [min] | [mAU*s] | [mAU]      | %                 |
|---|--------|-------|---------|------------|-------------------|
| 1 | 17.731 | BB    | 0.5955  | 5110.96631 | 128.36464 50.0586 |
| 2 | 29.975 | BB    | 1.0157  | 5099.00293 | 74.29411 49.9414  |

## HPLC chromatogram of chiral 6da

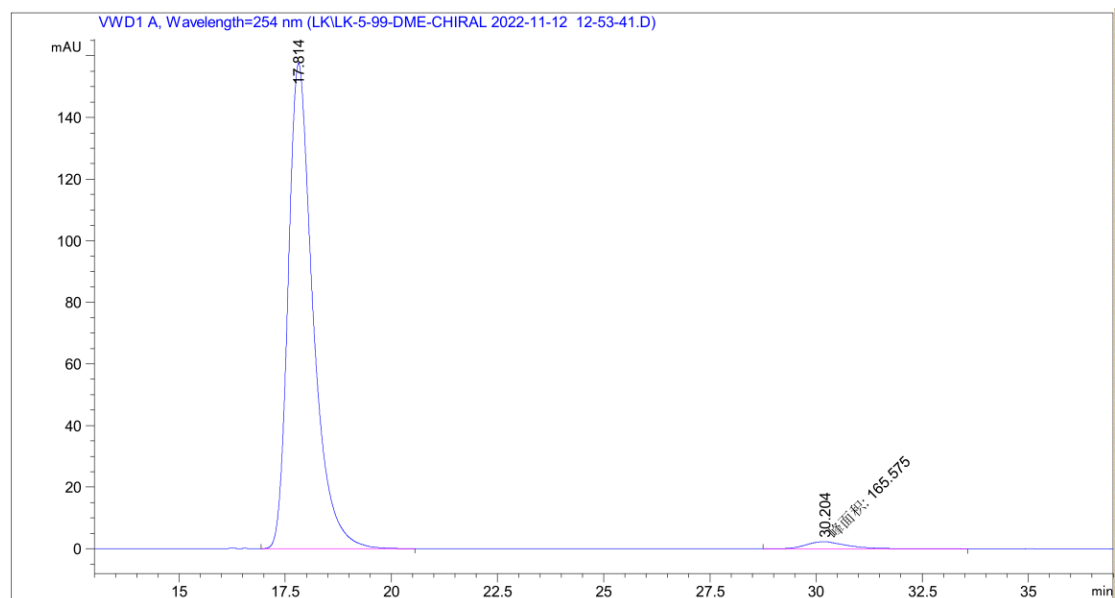

| # | [min]  | [min] | [mAU*s] | [mAU]      | %                 |
|---|--------|-------|---------|------------|-------------------|
| 1 | 17.814 | BB    | 0.6083  | 6394.06592 | 157.60391 97.4758 |
| 2 | 30.204 | MM    | 1.1956  | 165.57541  | 2.30816 2.5242    |

## HPLC chromatogram of racemic 6ea

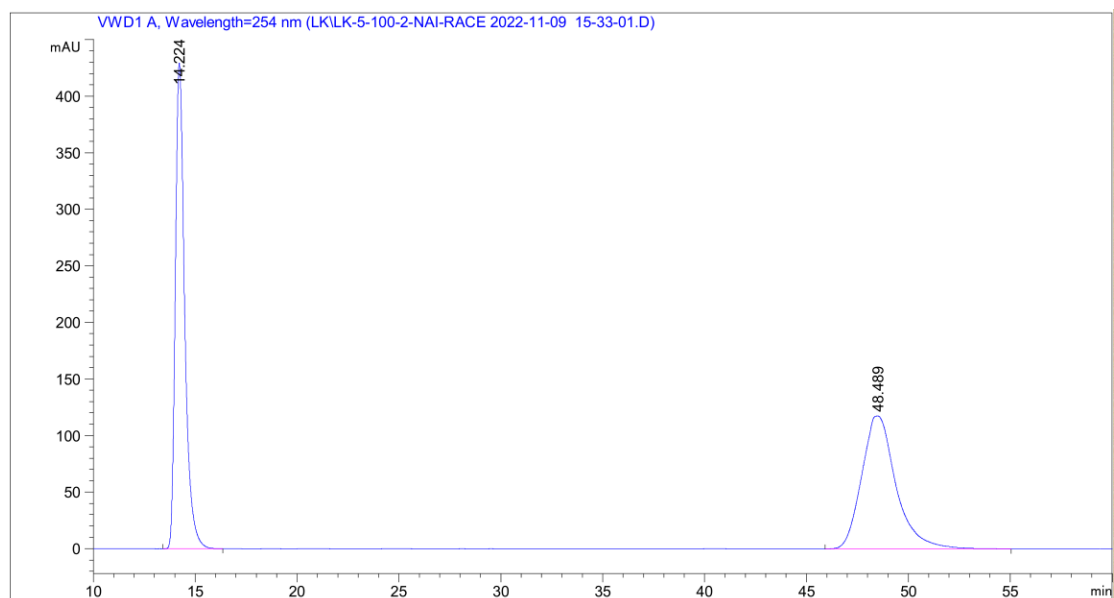

| # | [min]  | [min] | [mAU*s] | [mAU]     | %                 |
|---|--------|-------|---------|-----------|-------------------|
| 1 | 14.224 | BB    | 0.4838  | 1.36801e4 | 429.24008 49.8732 |
| 2 | 48.489 | BB    | 1.6573  | 1.37497e4 | 117.48980 50.1268 |

## HPLC chromatogram of chiral 6ea

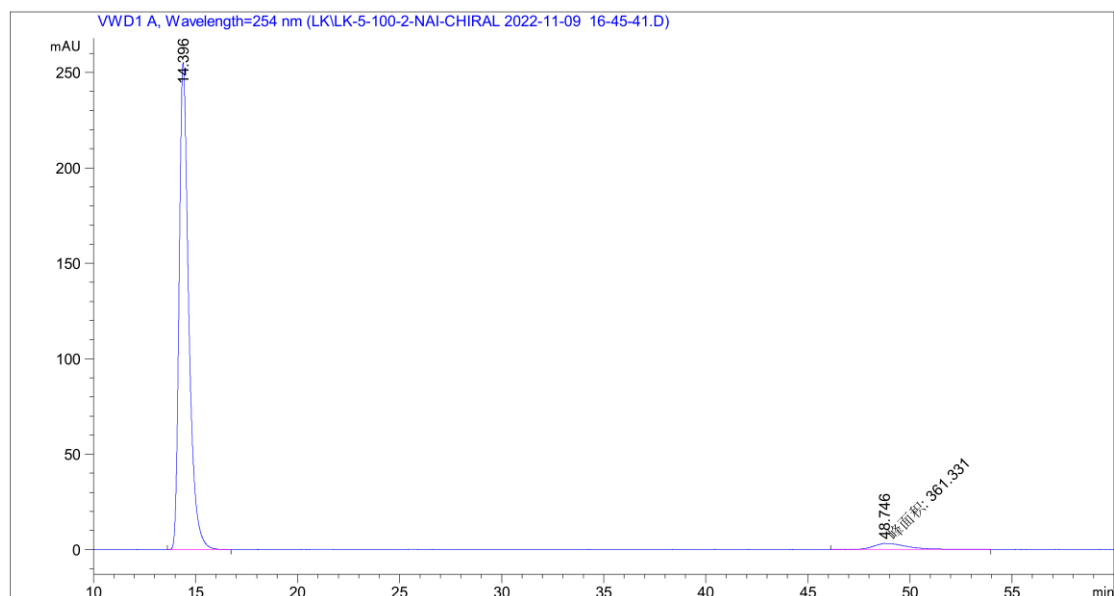

| # | [min]  | [min] | [mAU*s] | [mAU]      | %                 |
|---|--------|-------|---------|------------|-------------------|
| 1 | 14.396 | BB    | 0.4946  | 8349.77441 | 255.28419 95.8521 |
| 2 | 48.746 | MM    | 1.9113  | 361.33124  | 3.15085 4.1479    |

## HPLC chromatogram of racemic 6fa

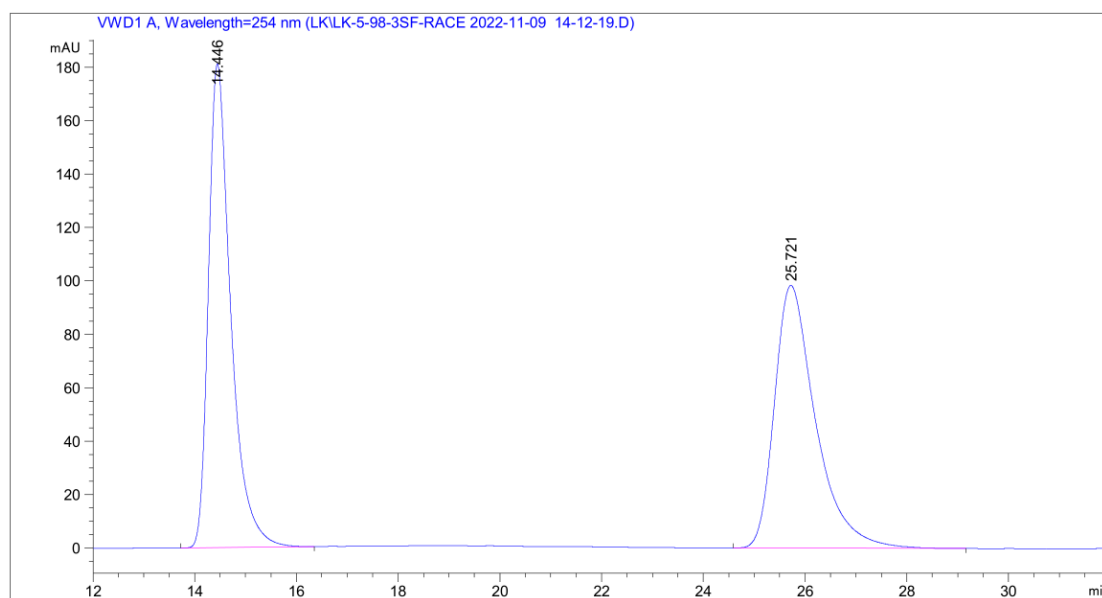

| # | [min]  | [min] | [mAU*s] | [mAU]      | %                 |
|---|--------|-------|---------|------------|-------------------|
| 1 | 14.446 | BB    | 0.4529  | 5527.47705 | 181.18355 50.0001 |
| 2 | 25.721 | BB    | 0.8364  | 5527.46338 | 98.39390 49.9999  |

## HPLC chromatogram of chiral 6fa

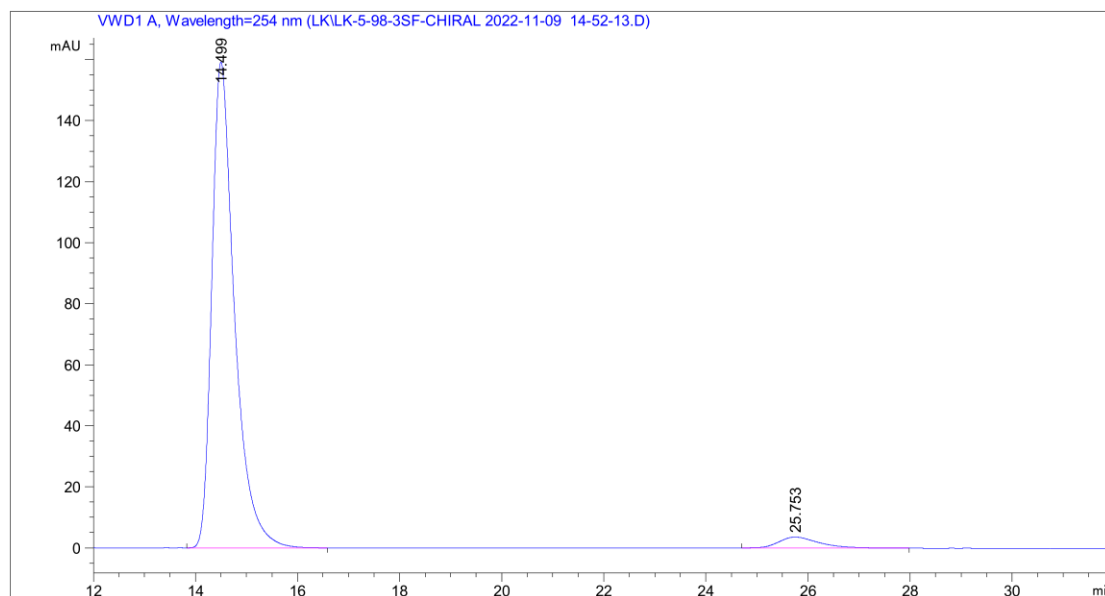

| # | [min]  | [min] | [mAU*s] | [mAU]      | %                 |
|---|--------|-------|---------|------------|-------------------|
| 1 | 14.499 | BB    | 0.4592  | 4917.06787 | 159.24268 96.1186 |
| 2 | 25.753 | BB    | 0.7739  | 198.55565  | 3.61418 3.8814    |

## HPLC chromatogram of racemic 6ab

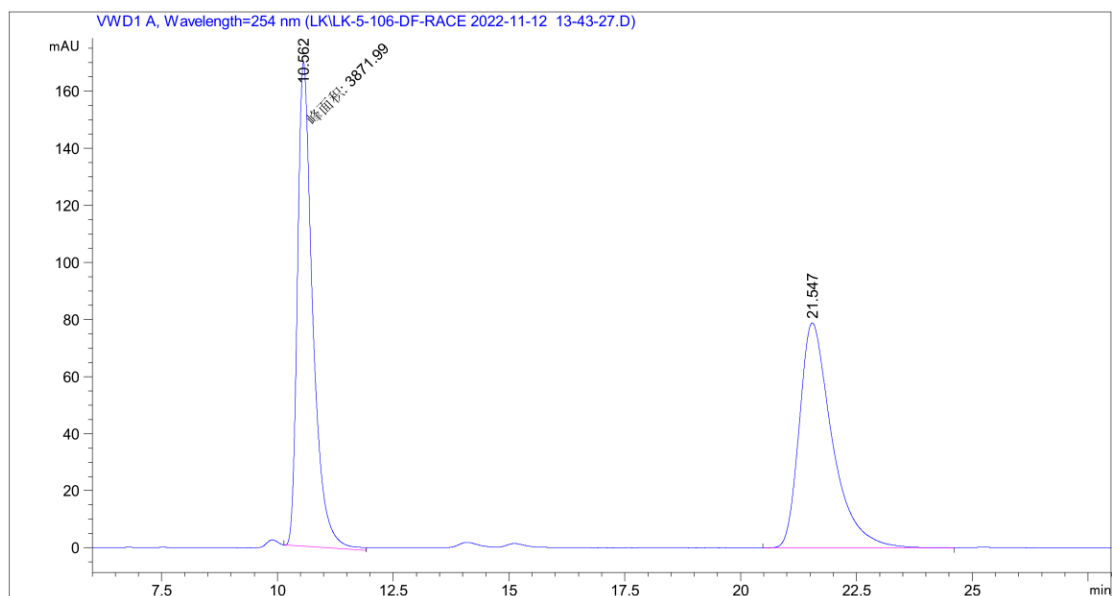

| # | [min]  | [min] | [mAU*s] | [mAU]      | %         |         |
|---|--------|-------|---------|------------|-----------|---------|
| 1 | 10.562 | MM    | 0.3804  | 3871.99121 | 169.63054 | 49.9591 |
| 2 | 21.547 | BB    | 0.7329  | 3878.33789 | 78.84607  | 50.0409 |

## HPLC chromatogram of chiral 6ab

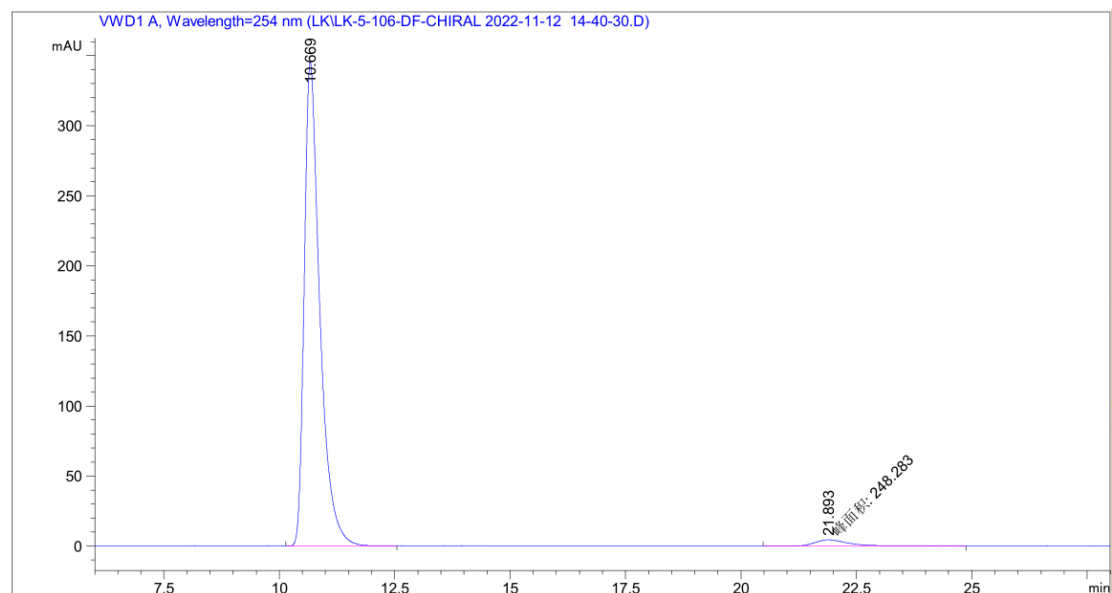

| # | [min]  | [min] | [mAU*s] | [mAU]      | %         |         |
|---|--------|-------|---------|------------|-----------|---------|
| 1 | 10.669 | BB    | 0.3500  | 8109.33301 | 345.31799 | 97.0293 |
| 2 | 21.893 | MM    | 0.9230  | 248.28287  | 4.48323   | 2.9707  |

## HPLC chromatogram of racemic 6ac

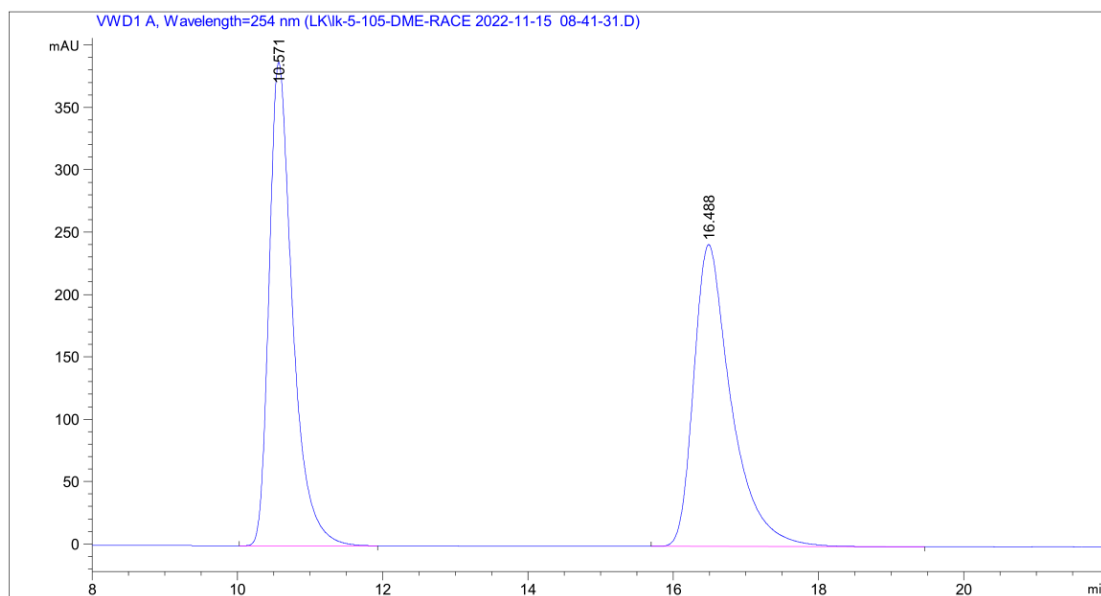

| # | [min]  | [min] | [mAU*s] | [mAU]      | %                 |
|---|--------|-------|---------|------------|-------------------|
| 1 | 10.571 | BB    | 0.3360  | 8675.61914 | 387.80081 49.9306 |
| 2 | 16.488 | BB    | 0.5284  | 8699.72949 | 242.01027 50.0694 |

## HPLC chromatogram of chiral 6ac

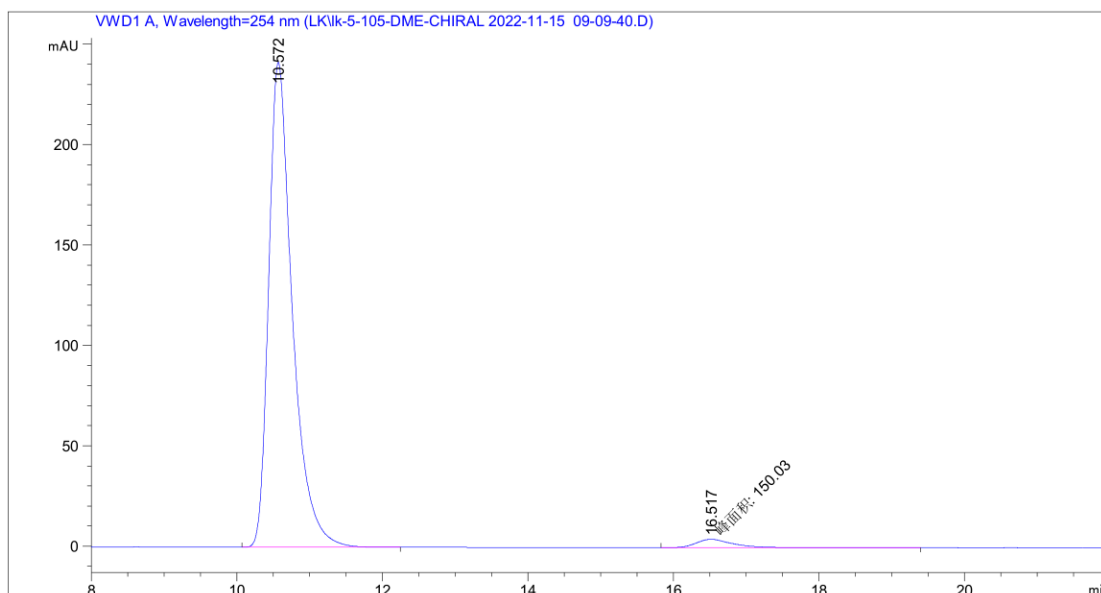

| # | [min]  | [min] | [mAU*s] | [mAU]      | %                 |
|---|--------|-------|---------|------------|-------------------|
| 1 | 10.572 | BB    | 0.3366  | 5458.12207 | 241.57108 97.3248 |
| 2 | 16.517 | MM    | 0.5957  | 150.02959  | 4.19725 2.6752    |

## HPLC chromatogram of racemic 6ad

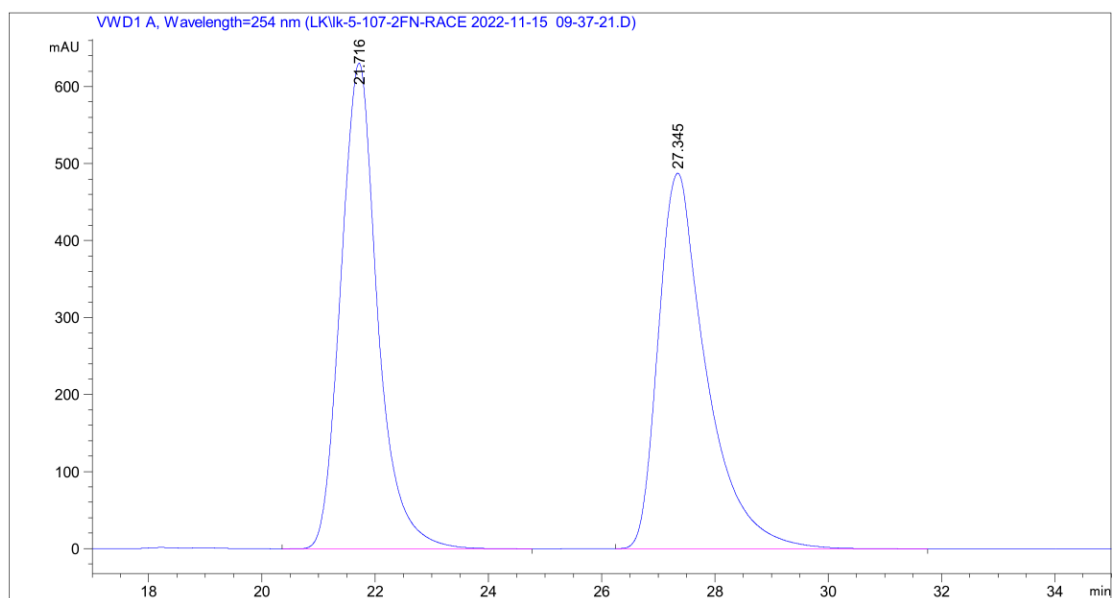

| # | [min]  | [min] | [mAU*s] | [mAU]     | %                 |
|---|--------|-------|---------|-----------|-------------------|
| 1 | 21.716 | BB    | 0.6955  | 2.85825e4 | 630.91125 49.8678 |
| 2 | 27.345 | BB    | 0.8564  | 2.87340e4 | 487.67487 50.1322 |

## HPLC chromatogram of chiral 6ad

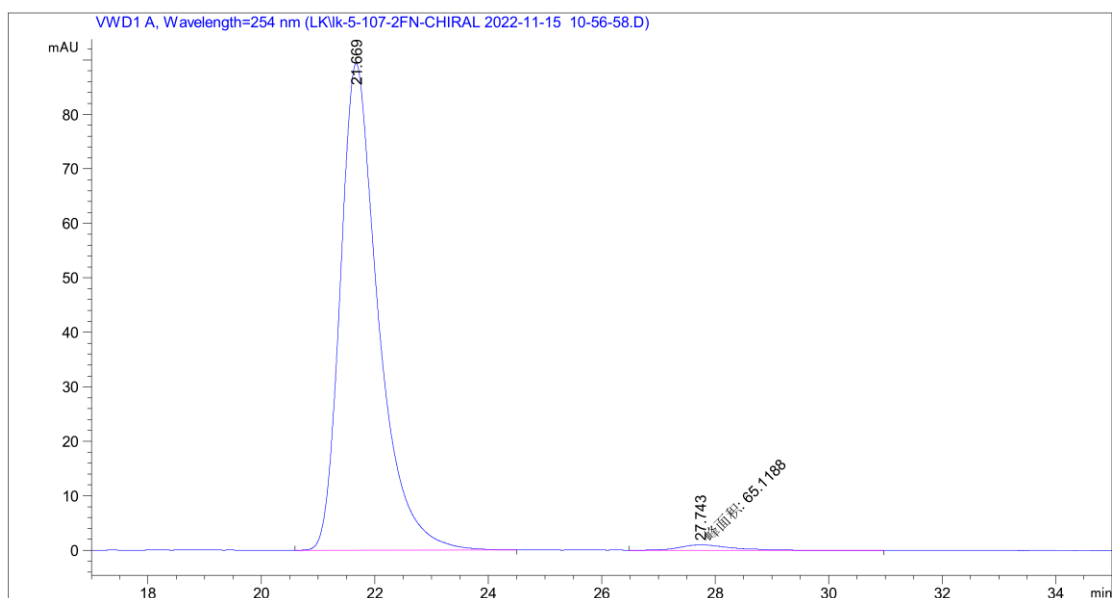

| # | [min]  | [min] | [mAU*s] | [mAU]      | %                |
|---|--------|-------|---------|------------|------------------|
| 1 | 21.669 | BB    | 0.6895  | 4154.13623 | 89.33522 98.4566 |
| 2 | 27.743 | MM    | 1.0746  | 65.11877   | 1.00998 1.5434   |

## HPLC chromatogram of racemic 7

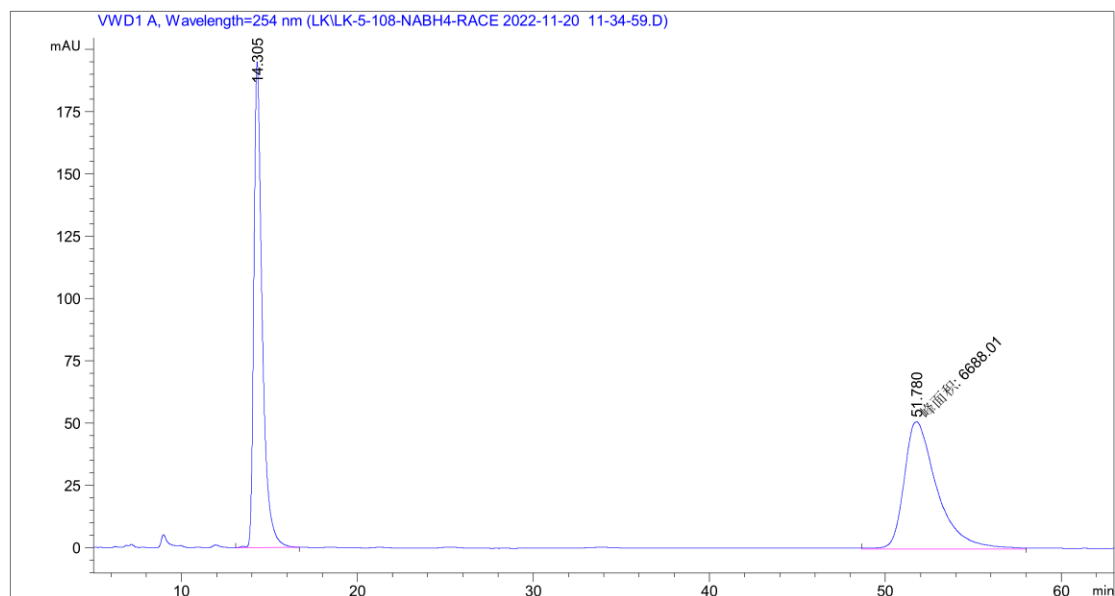

| # | [min]  | [min] | [mAU*s] | [mAU]      | %         |         |
|---|--------|-------|---------|------------|-----------|---------|
| 1 | 14.305 | BB    | 0.4858  | 6426.32715 | 194.83614 | 49.0023 |
| 2 | 51.780 | MM    | 2.1814  | 6688.00684 | 51.09893  | 50.9977 |

## HPLC chromatogram of chiral 7

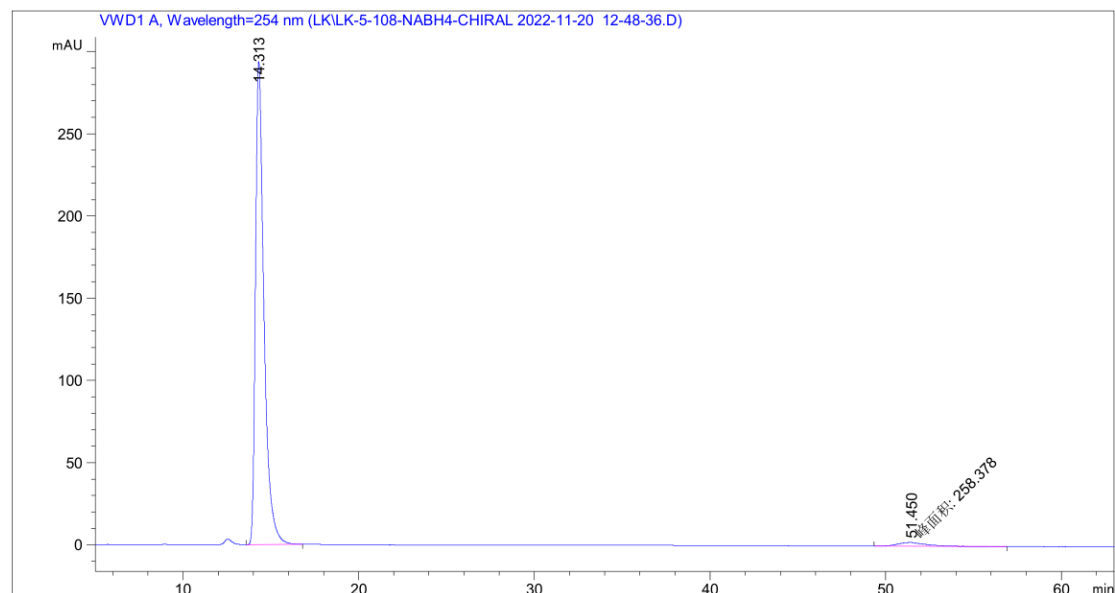

| # | [min]  | [min] | [mAU*s] | [mAU]      | %         |         |
|---|--------|-------|---------|------------|-----------|---------|
| 1 | 14.313 | BB    | 0.4939  | 9851.08496 | 293.98166 | 97.4442 |
| 2 | 51.450 | MM    | 1.9238  | 258.37796  | 2.23840   | 2.5558  |

### X-Ray Crystallographic Data of 3ea, 6aa and 7

Crystallographic data for **3ea** have been deposited with the Cambridge Crystallographic Data Centre as deposition number 2208234. These data can be obtained free of charge via [www.ccdc.cam.ac.uk/data\\_request/cif](http://www.ccdc.cam.ac.uk/data_request/cif), or by emailing [data\\_request@ccdc.cam.ac.uk](mailto:data_request@ccdc.cam.ac.uk), or by contacting The Cambridge Crystallographic Data Centre, 12, Union Road, Cambridge CB2 1EZ, UK; fax: +44 1223 336033.

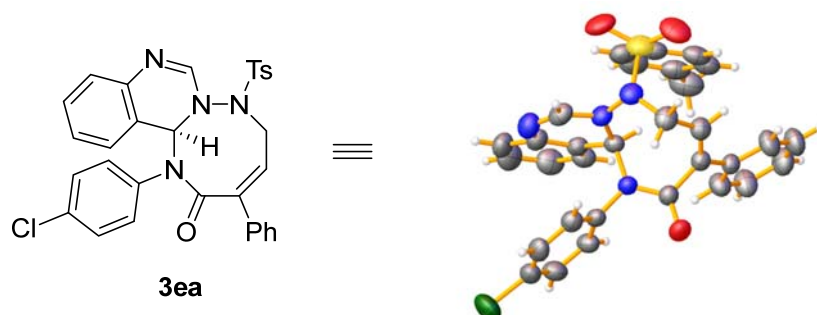

**Table S1. Crystal data and structure refinement for 3ea**

|                                 |                                                                                                      |
|---------------------------------|------------------------------------------------------------------------------------------------------|
| Identification code             | <b>3ea</b>                                                                                           |
| Empirical formula               | C <sub>31</sub> H <sub>25</sub> ClN <sub>4</sub> O <sub>3</sub> S                                    |
| Formula weight                  | 569.06                                                                                               |
| Temperature                     | 297.0 K                                                                                              |
| Wavelength                      | 1.54178 Å                                                                                            |
| Crystal system                  | Monoclinic                                                                                           |
| Space group                     | P 1 21 1                                                                                             |
| Unit cell dimensions            | a = 11.6897(6) Å      α = 90°<br>b = 8.7462(4) Å      β = 97.984(3)°<br>c = 27.9426(14) Å    γ = 90° |
| Volume                          | 2829.2(2) Å <sup>3</sup>                                                                             |
| Z                               | 4                                                                                                    |
| Density (calculated)            | 1.336 Mg/m <sup>3</sup>                                                                              |
| Absorption coefficient          | 2.208 mm <sup>-1</sup>                                                                               |
| F(000)                          | 1184                                                                                                 |
| Crystal size                    | 0.19 x 0.12 x 0.1 mm <sup>3</sup>                                                                    |
| Theta range for data collection | 3.194 to 68.397°.                                                                                    |
| Index ranges                    | -13 ≤ h ≤ 13, -10 ≤ k ≤ 9, -33 ≤ l ≤ 33                                                              |
| Reflections collected           | 71651                                                                                                |
| Independent reflections         | 9849 [R(int) = 0.0686]                                                                               |
| Completeness to theta = 67.679° | 98.9 %                                                                                               |
| Absorption correction           | Semi-empirical from equivalents                                                                      |
| Max. and min. transmission      | 0.7362 and 0.5944                                                                                    |
| Refinement method               | Full-matrix least-squares on F <sup>2</sup>                                                          |
| Data / restraints / parameters  | 9849 / 1 / 723                                                                                       |



|                                      |                                    |
|--------------------------------------|------------------------------------|
| Goodness-of-fit on $F^2$             | 1.118                              |
| Final R indices [ $I > 2\sigma(I)$ ] | R1 = 0.0471, wR2 = 0.1158          |
| R indices (all data)                 | R1 = 0.0620, wR2 = 0.1270          |
| Absolute structure parameter         | 0.077(7)                           |
| Extinction coefficient               | n/a                                |
| Largest diff. peak and hole          | 0.274 and -0.425 e.Å <sup>-3</sup> |

**Table S2. Atomic coordinates ( $\times 10^4$ ) and equivalent isotropic displacement parameters ( $\text{\AA}^2 \times 10^3$ ) for 3ea.  $U(\text{eq})$  is defined as one third of the trace of the orthogonalized  $U_{ij}$  tensor.**

|        | x        | y       | z        | U (eq) |
|--------|----------|---------|----------|--------|
| S(01)  | 1814(1)  | 6120(2) | 4804(1)  | 68(1)  |
| S(02)  | 4987(1)  | 6834(1) | 8175(1)  | 65(1)  |
| Cl(03) | 388(1)   | 2012(2) | 10337(1) | 96(1)  |
| Cl(04) | -1476(1) | 8051(2) | 7739(1)  | 102(1) |
| N(005) | 1917(3)  | 7732(4) | 6358(1)  | 44(1)  |
| O(006) | 2989(3)  | 9790(4) | 6638(1)  | 65(1)  |
| O(007) | 5670(3)  | 2601(5) | 9904(1)  | 75(1)  |
| N(008) | 3774(3)  | 5318(4) | 8708(1)  | 54(1)  |
| N(009) | 4332(3)  | 3231(4) | 9269(1)  | 50(1)  |
| N(00A) | 1396(3)  | 7380(4) | 5197(1)  | 55(1)  |
| N(00B) | 4648(3)  | 6426(4) | 8724(1)  | 57(1)  |
| O(00C) | 813(4)   | 5225(5) | 4641(1)  | 89(1)  |
| N(00D) | 996(3)   | 6678(4) | 5589(1)  | 49(1)  |
| O(00E) | 3947(3)  | 7368(4) | 7902(1)  | 82(1)  |
| O(00F) | 2363(3)  | 7019(5) | 4476(1)  | 87(1)  |
| C(00G) | 2821(3)  | 8712(5) | 6359(1)  | 47(1)  |
| O(00H) | 5974(4)  | 7795(5) | 8266(1)  | 94(1)  |
| C(00I) | 3626(3)  | 8450(4) | 5988(1)  | 46(1)  |
| N(00J) | 1763(4)  | 5020(5) | 8535(2)  | 71(1)  |
| C(00K) | 1130(3)  | 7943(4) | 6708(1)  | 45(1)  |
| C(00L) | 3048(4)  | 2820(5) | 8503(1)  | 51(1)  |
| C(00M) | 3390(4)  | 2927(5) | 9541(1)  | 51(1)  |
| C(00N) | 1752(3)  | 6376(4) | 6040(1)  | 43(1)  |
| C(00O) | 3259(4)  | 8644(5) | 5520(2)  | 52(1)  |
| C(00P) | 1237(4)  | 5056(5) | 6282(1)  | 48(1)  |
| C(00Q) | 7293(4)  | 2590(6) | 9138(2)  | 57(1)  |
| N(00R) | -677(3)  | 5594(5) | 5828(2)  | 66(1)  |
| C(00S) | 5442(4)  | 3116(5) | 9498(2)  | 55(1)  |
| C(00T) | 4805(3)  | 7933(5) | 6176(1)  | 46(1)  |
| C(00U) | 58(4)    | 4788(5) | 6186(2)  | 56(1)  |

|        |         |         |          |       |
|--------|---------|---------|----------|-------|
| C(00V) | 91(4)   | 8681(5) | 6577(2)  | 54(1) |
| C(00W) | 6397(4) | 3706(6) | 9237(1)  | 54(1) |
| C(00X) | 4047(4) | 3706(5) | 8759(1)  | 48(1) |
| C(00Y) | 1387(4) | 7308(5) | 7161(2)  | 54(1) |
| C(00Z) | -709(4) | 8738(6) | 6901(2)  | 62(1) |
| C(010) | 2024(4) | 8850(5) | 5292(2)  | 58(1) |
| C(011) | 2658(5) | 5841(6) | 8663(2)  | 66(1) |
| C(012) | -431(5) | 3627(6) | 6437(2)  | 69(1) |
| C(013) | 5018(4) | 7107(6) | 6601(2)  | 60(1) |
| C(014) | 4781(5) | 4403(6) | 5490(2)  | 66(1) |
| C(015) | 6457(4) | 5173(6) | 9117(2)  | 59(1) |
| C(016) | 1966(4) | 3498(6) | 8414(2)  | 59(1) |
| C(017) | -457(4) | 8057(6) | 7343(2)  | 62(1) |
| C(018) | 3195(4) | 1344(6) | 8346(2)  | 62(1) |
| C(019) | 2889(4) | 4107(6) | 9759(2)  | 61(1) |
| C(01A) | 8446(4) | 3018(7) | 9173(2)  | 72(1) |
| C(01B) | 593(4)  | 7346(6) | 7481(2)  | 63(1) |
| C(01C) | 1947(4) | 3837(6) | 9999(2)  | 69(1) |
| C(01D) | 5566(4) | 6364(6) | 9153(2)  | 64(1) |
| C(01E) | 2835(4) | 4896(6) | 5130(2)  | 62(1) |
| C(01F) | 4408(5) | 3191(6) | 5753(2)  | 68(1) |
| C(01G) | -178(4) | 6449(5) | 5554(2)  | 59(1) |
| C(01H) | 4487(5) | 4262(6) | 7645(2)  | 64(1) |
| C(01I) | 5722(4) | 8130(6) | 5914(2)  | 64(1) |
| C(01J) | 6988(4) | 1139(6) | 8965(2)  | 66(1) |
| C(01K) | 2987(4) | 1449(5) | 9574(2)  | 58(1) |
| C(01L) | 4005(5) | 5271(6) | 5184(2)  | 65(1) |
| C(01M) | 1924(4) | 4149(5) | 6609(2)  | 57(1) |
| C(01N) | 259(5)  | 2760(6) | 6768(2)  | 78(2) |
| C(01O) | 6969(4) | 6623(7) | 6474(2)  | 71(1) |
| C(01P) | 6087(4) | 6454(7) | 6745(2)  | 72(1) |
| C(01Q) | 5360(4) | 5128(6) | 7906(2)  | 60(1) |
| C(01R) | 1445(5) | 2999(6) | 6851(2)  | 75(1) |
| C(01S) | 1548(4) | 2371(6) | 10027(2) | 63(1) |
| C(01T) | 4744(6) | 2860(7) | 7459(2)  | 77(2) |
| C(01U) | 9255(5) | 2018(9) | 9035(2)  | 83(2) |
| C(01V) | 3245(5) | 2819(6) | 5679(2)  | 72(1) |
| C(01W) | 1035(5) | 2658(7) | 8173(2)  | 75(2) |
| C(01X) | 2054(4) | 1167(6) | 9817(2)  | 66(1) |
| C(01Y) | 6483(5) | 4605(8) | 7964(2)  | 80(2) |
| C(01Z) | 6780(4) | 7467(7) | 6061(2)  | 72(1) |
| C(020) | 1208(5) | 1191(8) | 8029(2)  | 82(2) |

|        |          |         |          |        |
|--------|----------|---------|----------|--------|
| C(021) | 2273(5)  | 543(7)  | 8108(2)  | 77(2)  |
| C(022) | 2458(5)  | 3658(6) | 5373(2)  | 69(1)  |
| C(023) | 6725(6)  | 3193(9) | 7772(2)  | 93(2)  |
| C(024) | 5238(6)  | 2344(7) | 6115(2)  | 91(2)  |
| C(025) | 7799(5)  | 165(7)  | 8827(2)  | 79(2)  |
| C(026) | 5853(7)  | 2298(8) | 7526(2)  | 93(2)  |
| C(027) | 8936(5)  | 605(9)  | 8859(2)  | 87(2)  |
| C(028) | 6137(10) | 752(10) | 7338(3)  | 151(4) |
| S(01)  | 1814(1)  | 6120(2) | 4804(1)  | 68(1)  |
| S(02)  | 4987(1)  | 6834(1) | 8175(1)  | 65(1)  |
| Cl(03) | 388(1)   | 2012(2) | 10337(1) | 96(1)  |
| Cl(04) | -1476(1) | 8051(2) | 7739(1)  | 102(1) |
| N(005) | 1917(3)  | 7732(4) | 6358(1)  | 44(1)  |
| O(006) | 2989(3)  | 9790(4) | 6638(1)  | 65(1)  |
| O(007) | 5670(3)  | 2601(5) | 9904(1)  | 75(1)  |
| N(008) | 3774(3)  | 5318(4) | 8708(1)  | 54(1)  |
| N(009) | 4332(3)  | 3231(4) | 9269(1)  | 50(1)  |
| N(00A) | 1396(3)  | 7380(4) | 5197(1)  | 55(1)  |
| N(00B) | 4648(3)  | 6426(4) | 8724(1)  | 57(1)  |
| O(00C) | 813(4)   | 5225(5) | 4641(1)  | 89(1)  |
| N(00D) | 996(3)   | 6678(4) | 5589(1)  | 49(1)  |
| O(00E) | 3947(3)  | 7368(4) | 7902(1)  | 82(1)  |
| O(00F) | 2363(3)  | 7019(5) | 4476(1)  | 87(1)  |
| C(00G) | 2821(3)  | 8712(5) | 6359(1)  | 47(1)  |
| O(00H) | 5974(4)  | 7795(5) | 8266(1)  | 94(1)  |
| C(00I) | 3626(3)  | 8450(4) | 5988(1)  | 46(1)  |
| N(00J) | 1763(4)  | 5020(5) | 8535(2)  | 71(1)  |
| C(00K) | 1130(3)  | 7943(4) | 6708(1)  | 45(1)  |
| C(00L) | 3048(4)  | 2820(5) | 8503(1)  | 51(1)  |
| C(00M) | 3390(4)  | 2927(5) | 9541(1)  | 51(1)  |
| C(00N) | 1752(3)  | 6376(4) | 6040(1)  | 43(1)  |
| C(00O) | 3259(4)  | 8644(5) | 5520(2)  | 52(1)  |
| C(00P) | 1237(4)  | 5056(5) | 6282(1)  | 48(1)  |
| C(00Q) | 7293(4)  | 2590(6) | 9138(2)  | 57(1)  |
| N(00R) | -677(3)  | 5594(5) | 5828(2)  | 66(1)  |
| C(00S) | 5442(4)  | 3116(5) | 9498(2)  | 55(1)  |
| C(00T) | 4805(3)  | 7933(5) | 6176(1)  | 46(1)  |
| C(00U) | 58(4)    | 4788(5) | 6186(2)  | 56(1)  |
| C(00V) | 91(4)    | 8681(5) | 6577(2)  | 54(1)  |
| C(00W) | 6397(4)  | 3706(6) | 9237(1)  | 54(1)  |
| C(00X) | 4047(4)  | 3706(5) | 8759(1)  | 48(1)  |
| C(00Y) | 1387(4)  | 7308(5) | 7161(2)  | 54(1)  |

|        |         |         |          |       |
|--------|---------|---------|----------|-------|
| C(00Z) | -709(4) | 8738(6) | 6901(2)  | 62(1) |
| C(010) | 2024(4) | 8850(5) | 5292(2)  | 58(1) |
| C(011) | 2658(5) | 5841(6) | 8663(2)  | 66(1) |
| C(012) | -431(5) | 3627(6) | 6437(2)  | 69(1) |
| C(013) | 5018(4) | 7107(6) | 6601(2)  | 60(1) |
| C(014) | 4781(5) | 4403(6) | 5490(2)  | 66(1) |
| C(015) | 6457(4) | 5173(6) | 9117(2)  | 59(1) |
| C(016) | 1966(4) | 3498(6) | 8414(2)  | 59(1) |
| C(017) | -457(4) | 8057(6) | 7343(2)  | 62(1) |
| C(018) | 3195(4) | 1344(6) | 8346(2)  | 62(1) |
| C(019) | 2889(4) | 4107(6) | 9759(2)  | 61(1) |
| C(01A) | 8446(4) | 3018(7) | 9173(2)  | 72(1) |
| C(01B) | 593(4)  | 7346(6) | 7481(2)  | 63(1) |
| C(01C) | 1947(4) | 3837(6) | 9999(2)  | 69(1) |
| C(01D) | 5566(4) | 6364(6) | 9153(2)  | 64(1) |
| C(01E) | 2835(4) | 4896(6) | 5130(2)  | 62(1) |
| C(01F) | 4408(5) | 3191(6) | 5753(2)  | 68(1) |
| C(01G) | -178(4) | 6449(5) | 5554(2)  | 59(1) |
| C(01H) | 4487(5) | 4262(6) | 7645(2)  | 64(1) |
| C(01I) | 5722(4) | 8130(6) | 5914(2)  | 64(1) |
| C(01J) | 6988(4) | 1139(6) | 8965(2)  | 66(1) |
| C(01K) | 2987(4) | 1449(5) | 9574(2)  | 58(1) |
| C(01L) | 4005(5) | 5271(6) | 5184(2)  | 65(1) |
| C(01M) | 1924(4) | 4149(5) | 6609(2)  | 57(1) |
| C(01N) | 259(5)  | 2760(6) | 6768(2)  | 78(2) |
| C(01O) | 6969(4) | 6623(7) | 6474(2)  | 71(1) |
| C(01P) | 6087(4) | 6454(7) | 6745(2)  | 72(1) |
| C(01Q) | 5360(4) | 5128(6) | 7906(2)  | 60(1) |
| C(01R) | 1445(5) | 2999(6) | 6851(2)  | 75(1) |
| C(01S) | 1548(4) | 2371(6) | 10027(2) | 63(1) |
| C(01T) | 4744(6) | 2860(7) | 7459(2)  | 77(2) |
| C(01U) | 9255(5) | 2018(9) | 9035(2)  | 83(2) |
| C(01V) | 3245(5) | 2819(6) | 5679(2)  | 72(1) |
| C(01W) | 1035(5) | 2658(7) | 8173(2)  | 75(2) |
| C(01X) | 2054(4) | 1167(6) | 9817(2)  | 66(1) |
| C(01Y) | 6483(5) | 4605(8) | 7964(2)  | 80(2) |
| C(01Z) | 6780(4) | 7467(7) | 6061(2)  | 72(1) |
| C(020) | 1208(5) | 1191(8) | 8029(2)  | 82(2) |
| C(021) | 2273(5) | 543(7)  | 8108(2)  | 77(2) |
| C(022) | 2458(5) | 3658(6) | 5373(2)  | 69(1) |
| C(023) | 6725(6) | 3193(9) | 7772(2)  | 93(2) |
| C(024) | 5238(6) | 2344(7) | 6115(2)  | 91(2) |

|        |          |         |         |        |
|--------|----------|---------|---------|--------|
| C(025) | 7799(5)  | 165(7)  | 8827(2) | 79(2)  |
| C(026) | 5853(7)  | 2298(8) | 7526(2) | 93(2)  |
| C(027) | 8936(5)  | 605(9)  | 8859(2) | 87(2)  |
| C(028) | 6137(10) | 752(10) | 7338(3) | 151(4) |

**Table S3. Bond lengths [Å] and angles [°] for 3ea**

|               |          |
|---------------|----------|
| S(01)-N(00A)  | 1.675(4) |
| S(01)-O(00C)  | 1.429(4) |
| S(01)-O(00F)  | 1.426(4) |
| S(01)-C(01E)  | 1.760(5) |
| S(02)-N(00B)  | 1.676(4) |
| S(02)-O(00E)  | 1.422(4) |
| S(02)-O(00H)  | 1.421(4) |
| S(02)-C(01Q)  | 1.753(5) |
| Cl(03)-C(01S) | 1.736(5) |
| Cl(04)-C(017) | 1.734(4) |
| N(005)-C(00G) | 1.360(5) |
| N(005)-C(00K) | 1.443(5) |
| N(005)-C(00N) | 1.478(5) |
| O(006)-C(00G) | 1.223(5) |
| O(007)-C(00S) | 1.216(5) |
| N(008)-N(00B) | 1.404(5) |
| N(008)-C(00X) | 1.448(6) |
| N(008)-C(011) | 1.372(6) |
| N(009)-C(00M) | 1.446(5) |
| N(009)-C(00S) | 1.369(5) |
| N(009)-C(00X) | 1.477(5) |
| N(00A)-N(00D) | 1.393(5) |
| N(00A)-C(010) | 1.486(6) |
| N(00B)-C(01D) | 1.494(6) |
| N(00D)-C(00N) | 1.460(5) |
| N(00D)-C(01G) | 1.377(5) |
| C(00G)-C(00I) | 1.511(5) |
| C(00I)-C(00O) | 1.329(6) |
| C(00I)-C(00T) | 1.477(6) |
| N(00J)-C(011) | 1.278(6) |
| N(00J)-C(016) | 1.402(7) |
| C(00K)-C(00V) | 1.380(6) |
| C(00K)-C(00Y) | 1.377(6) |
| C(00L)-C(00X) | 1.499(6) |
| C(00L)-C(016) | 1.388(6) |

|               |          |
|---------------|----------|
| C(00L)-C(018) | 1.382(7) |
| C(00M)-C(019) | 1.371(6) |
| C(00M)-C(01K) | 1.384(7) |
| C(00N)-C(00P) | 1.504(6) |
| C(00O)-C(010) | 1.506(6) |
| C(00P)-C(00U) | 1.387(6) |
| C(00P)-C(01M) | 1.381(6) |
| C(00Q)-C(00W) | 1.485(6) |
| C(00Q)-C(01A) | 1.390(6) |
| C(00Q)-C(01J) | 1.387(7) |
| N(00R)-C(00U) | 1.412(6) |
| N(00R)-C(01G) | 1.269(6) |
| C(00S)-C(00W) | 1.507(6) |
| C(00T)-C(013) | 1.382(6) |
| C(00T)-C(01I) | 1.390(6) |
| C(00U)-C(012) | 1.400(7) |
| C(00V)-C(00Z) | 1.390(6) |
| C(00W)-C(015) | 1.330(7) |
| C(00Y)-C(01B) | 1.375(6) |
| C(00Z)-C(017) | 1.367(7) |
| C(012)-C(01N) | 1.370(8) |
| C(013)-C(01P) | 1.382(7) |
| C(014)-C(01F) | 1.394(7) |
| C(014)-C(01L) | 1.383(7) |
| C(015)-C(01D) | 1.487(7) |
| C(016)-C(01W) | 1.405(7) |
| C(017)-C(01B) | 1.383(7) |
| C(018)-C(021) | 1.377(7) |
| C(019)-C(01C) | 1.387(7) |
| C(01A)-C(01U) | 1.381(8) |
| C(01C)-C(01S) | 1.371(7) |
| C(01E)-C(01L) | 1.394(7) |
| C(01E)-C(022) | 1.383(7) |
| C(01F)-C(01V) | 1.385(8) |
| C(01F)-C(024) | 1.497(7) |
| C(01H)-C(01Q) | 1.393(7) |
| C(01H)-C(01T) | 1.381(8) |
| C(01I)-C(01Z) | 1.375(7) |
| C(01J)-C(025) | 1.369(7) |
| C(01K)-C(01X) | 1.384(6) |
| C(01M)-C(01R) | 1.373(7) |
| C(01N)-C(01R) | 1.389(8) |

|                      |            |
|----------------------|------------|
| C(01O)-C(01P)        | 1.369(7)   |
| C(01O)-C(01Z)        | 1.364(7)   |
| C(01Q)-C(01Y)        | 1.378(7)   |
| C(01S)-C(01X)        | 1.378(7)   |
| C(01T)-C(026)        | 1.375(9)   |
| C(01U)-C(027)        | 1.363(10)  |
| C(01V)-C(022)        | 1.377(7)   |
| C(01W)-C(020)        | 1.368(9)   |
| C(01Y)-C(023)        | 1.390(9)   |
| C(020)-C(021)        | 1.358(8)   |
| C(023)-C(026)        | 1.389(10)  |
| C(025)-C(027)        | 1.374(8)   |
| C(026)-C(028)        | 1.504(11)  |
|                      |            |
| N(00A)-S(01)-C(01E)  | 107.46(18) |
| O(00C)-S(01)-N(00A)  | 105.6(2)   |
| O(00C)-S(01)-C(01E)  | 107.4(3)   |
| O(00F)-S(01)-N(00A)  | 104.9(2)   |
| O(00F)-S(01)-O(00C)  | 121.2(2)   |
| O(00F)-S(01)-C(01E)  | 109.6(2)   |
| N(00B)-S(02)-C(01Q)  | 108.45(19) |
| O(00E)-S(02)-N(00B)  | 105.6(2)   |
| O(00E)-S(02)-C(01Q)  | 107.1(2)   |
| O(00H)-S(02)-N(00B)  | 104.5(2)   |
| O(00H)-S(02)-O(00E)  | 120.9(3)   |
| O(00H)-S(02)-C(01Q)  | 109.7(3)   |
| C(00G)-N(005)-C(00K) | 119.1(3)   |
| C(00G)-N(005)-C(00N) | 122.9(3)   |
| C(00K)-N(005)-C(00N) | 117.8(3)   |
| N(00B)-N(008)-C(00X) | 121.3(3)   |
| C(011)-N(008)-N(00B) | 116.8(4)   |
| C(011)-N(008)-C(00X) | 121.9(4)   |
| C(00M)-N(009)-C(00X) | 118.2(3)   |
| C(00S)-N(009)-C(00M) | 118.8(3)   |
| C(00S)-N(009)-C(00X) | 122.9(3)   |
| N(00D)-N(00A)-S(01)  | 112.7(3)   |
| N(00D)-N(00A)-C(010) | 116.8(3)   |
| C(010)-N(00A)-S(01)  | 120.4(3)   |
| N(008)-N(00B)-S(02)  | 112.3(3)   |
| N(008)-N(00B)-C(01D) | 116.1(3)   |
| C(01D)-N(00B)-S(02)  | 120.4(3)   |
| N(00A)-N(00D)-C(00N) | 122.1(3)   |

|                      |          |
|----------------------|----------|
| C(01G)-N(00D)-N(00A) | 116.7(3) |
| C(01G)-N(00D)-C(00N) | 120.8(3) |
| N(005)-C(00G)-C(00I) | 117.5(3) |
| O(006)-C(00G)-N(005) | 122.9(4) |
| O(006)-C(00G)-C(00I) | 119.6(4) |
| C(00O)-C(00I)-C(00G) | 120.5(4) |
| C(00O)-C(00I)-C(00T) | 123.2(4) |
| C(00T)-C(00I)-C(00G) | 116.3(3) |
| C(011)-N(00J)-C(016) | 116.2(4) |
| C(00V)-C(00K)-N(005) | 120.0(4) |
| C(00Y)-C(00K)-N(005) | 119.5(3) |
| C(00Y)-C(00K)-C(00V) | 120.3(4) |
| C(016)-C(00L)-C(00X) | 119.7(4) |
| C(018)-C(00L)-C(00X) | 120.8(4) |
| C(018)-C(00L)-C(016) | 119.6(4) |
| C(019)-C(00M)-N(009) | 119.9(4) |
| C(019)-C(00M)-C(01K) | 120.2(4) |
| C(01K)-C(00M)-N(009) | 119.9(4) |
| N(005)-C(00N)-C(00P) | 111.9(3) |
| N(00D)-C(00N)-N(005) | 112.8(3) |
| N(00D)-C(00N)-C(00P) | 107.1(3) |
| C(00I)-C(00O)-C(010) | 126.2(4) |
| C(00U)-C(00P)-C(00N) | 119.4(4) |
| C(01M)-C(00P)-C(00N) | 120.4(4) |
| C(01M)-C(00P)-C(00U) | 120.1(4) |
| C(01A)-C(00Q)-C(00W) | 120.8(5) |
| C(01J)-C(00Q)-C(00W) | 120.9(4) |
| C(01J)-C(00Q)-C(01A) | 118.0(5) |
| C(01G)-N(00R)-C(00U) | 115.8(4) |
| O(007)-C(00S)-N(009) | 122.3(4) |
| O(007)-C(00S)-C(00W) | 119.8(4) |
| N(009)-C(00S)-C(00W) | 117.8(3) |
| C(013)-C(00T)-C(00I) | 120.9(4) |
| C(013)-C(00T)-C(01I) | 117.2(4) |
| C(01I)-C(00T)-C(00I) | 121.6(4) |
| C(00P)-C(00U)-N(00R) | 122.9(4) |
| C(00P)-C(00U)-C(012) | 119.3(5) |
| C(012)-C(00U)-N(00R) | 117.8(4) |
| C(00K)-C(00V)-C(00Z) | 119.4(4) |
| C(00Q)-C(00W)-C(00S) | 117.0(4) |
| C(015)-C(00W)-C(00Q) | 121.6(4) |
| C(015)-C(00W)-C(00S) | 121.4(4) |



|                      |          |
|----------------------|----------|
| N(008)-C(00X)-N(009) | 112.7(3) |
| N(008)-C(00X)-C(00L) | 108.0(4) |
| N(009)-C(00X)-C(00L) | 111.8(3) |
| C(01B)-C(00Y)-C(00K) | 120.5(4) |
| C(017)-C(00Z)-C(00V) | 119.6(4) |
| N(00A)-C(010)-C(00O) | 113.1(4) |
| N(00J)-C(011)-N(008) | 124.7(5) |
| C(01N)-C(012)-C(00U) | 119.8(5) |
| C(00T)-C(013)-C(01P) | 121.0(4) |
| C(01L)-C(014)-C(01F) | 121.1(5) |
| C(00W)-C(015)-C(01D) | 126.6(5) |
| N(00J)-C(016)-C(01W) | 117.8(5) |
| C(00L)-C(016)-N(00J) | 122.9(4) |
| C(00L)-C(016)-C(01W) | 119.2(5) |
| C(00Z)-C(017)-Cl(04) | 119.8(4) |
| C(00Z)-C(017)-C(01B) | 121.3(4) |
| C(01B)-C(017)-Cl(04) | 118.9(4) |
| C(021)-C(018)-C(00L) | 120.3(5) |
| C(00M)-C(019)-C(01C) | 120.3(5) |
| C(01U)-C(01A)-C(00Q) | 120.4(6) |
| C(00Y)-C(01B)-C(017) | 118.9(5) |
| C(01S)-C(01C)-C(019) | 119.1(5) |
| C(015)-C(01D)-N(00B) | 113.8(4) |
| C(01L)-C(01E)-S(01)  | 119.8(4) |
| C(022)-C(01E)-S(01)  | 119.4(4) |
| C(022)-C(01E)-C(01L) | 120.4(5) |
| C(014)-C(01F)-C(024) | 120.8(6) |
| C(01V)-C(01F)-C(014) | 118.1(5) |
| C(01V)-C(01F)-C(024) | 121.0(5) |
| N(00R)-C(01G)-N(00D) | 125.5(4) |
| C(01T)-C(01H)-C(01Q) | 119.9(5) |
| C(01Z)-C(01I)-C(00T) | 121.2(4) |
| C(025)-C(01J)-C(00Q) | 120.9(5) |
| C(00M)-C(01K)-C(01X) | 119.9(5) |
| C(014)-C(01L)-C(01E) | 119.1(5) |
| C(01R)-C(01M)-C(00P) | 120.5(5) |
| C(012)-C(01N)-C(01R) | 120.6(5) |
| C(01Z)-C(01O)-C(01P) | 118.8(5) |
| C(01O)-C(01P)-C(013) | 120.9(4) |
| C(01H)-C(01Q)-S(02)  | 118.7(4) |
| C(01Y)-C(01Q)-S(02)  | 121.5(4) |
| C(01Y)-C(01Q)-C(01H) | 119.8(5) |

|                      |          |
|----------------------|----------|
| C(01M)-C(01R)-C(01N) | 119.6(5) |
| C(01C)-C(01S)-Cl(03) | 119.5(4) |
| C(01C)-C(01S)-C(01X) | 121.4(4) |
| C(01X)-C(01S)-Cl(03) | 119.1(4) |
| C(026)-C(01T)-C(01H) | 121.1(6) |
| C(027)-C(01U)-C(01A) | 120.7(5) |
| C(022)-C(01V)-C(01F) | 121.7(5) |
| C(020)-C(01W)-C(016) | 119.7(5) |
| C(01S)-C(01X)-C(01K) | 119.1(5) |
| C(01Q)-C(01Y)-C(023) | 119.4(6) |
| C(01O)-C(01Z)-C(01I) | 120.9(4) |
| C(021)-C(020)-C(01W) | 120.9(5) |
| C(020)-C(021)-C(018) | 120.3(6) |
| C(01V)-C(022)-C(01E) | 119.4(5) |
| C(026)-C(023)-C(01Y) | 121.1(6) |
| C(01J)-C(025)-C(027) | 120.6(6) |
| C(01T)-C(026)-C(023) | 118.6(6) |
| C(01T)-C(026)-C(028) | 121.6(8) |
| C(023)-C(026)-C(028) | 119.8(8) |
| C(01U)-C(027)-C(025) | 119.4(6) |

**Table S4. Anisotropic displacement parameters ( $\text{\AA}^2 \times 10^3$ ) for 3ea. The anisotropic displacement factor exponent takes the form:  $-2\pi^2 [h^2 a^{*2} U_{11} + \dots + 2 h k a^* b^* U_{12}]$**

|        | $U^{11}$ | $U^{22}$ | $U^{33}$ | $U^{23}$ | $U^{13}$ | $U^{12}$ |
|--------|----------|----------|----------|----------|----------|----------|
| S(01)  | 79(1)    | 82(1)    | 40(1)    | -4(1)    | -2(1)    | 6(1)     |
| S(02)  | 82(1)    | 56(1)    | 55(1)    | 11(1)    | 1(1)     | -13(1)   |
| Cl(03) | 70(1)    | 127(1)   | 96(1)    | 15(1)    | 34(1)    | -4(1)    |
| Cl(04) | 84(1)    | 141(1)   | 90(1)    | -19(1)   | 46(1)    | -4(1)    |
| N(005) | 43(2)    | 44(2)    | 47(2)    | -7(1)    | 7(1)     | 0(1)     |
| O(006) | 62(2)    | 56(2)    | 80(2)    | -24(2)   | 16(2)    | -10(2)   |
| O(007) | 67(2)    | 108(3)   | 48(2)    | 25(2)    | 7(2)     | 5(2)     |
| N(008) | 57(2)    | 49(2)    | 53(2)    | 1(2)     | 4(2)     | -1(2)    |
| N(009) | 50(2)    | 62(2)    | 39(2)    | 6(2)     | 6(2)     | -2(2)    |
| N(00A) | 58(2)    | 60(2)    | 44(2)    | 6(2)     | -3(2)    | 3(2)     |
| N(00B) | 68(2)    | 52(2)    | 49(2)    | -1(2)    | -2(2)    | -8(2)    |
| O(00C) | 94(3)    | 105(3)   | 60(2)    | -27(2)   | -18(2)   | -9(2)    |
| N(00D) | 45(2)    | 54(2)    | 46(2)    | 1(2)     | -3(1)    | 2(2)     |
| O(00E) | 101(3)   | 71(2)    | 67(2)    | 18(2)    | -8(2)    | 16(2)    |
| O(00F) | 103(3)   | 112(3)   | 47(2)    | 18(2)    | 12(2)    | 18(2)    |
| C(00G) | 44(2)    | 45(2)    | 50(2)    | -4(2)    | 5(2)     | -1(2)    |
| O(00H) | 111(3)   | 83(3)    | 86(3)    | 12(2)    | 3(2)     | -51(2)   |

|        |       |        |       |        |       |        |
|--------|-------|--------|-------|--------|-------|--------|
| C(00I) | 43(2) | 44(2)  | 49(2) | 0(2)   | 5(2)  | -1(2)  |
| N(00J) | 56(3) | 81(3)  | 74(3) | 5(2)   | 7(2)  | 3(2)   |
| C(00K) | 41(2) | 46(2)  | 48(2) | -12(2) | 7(2)  | 2(2)   |
| C(00L) | 54(3) | 58(3)  | 40(2) | 6(2)   | 4(2)  | -8(2)  |
| C(00M) | 53(2) | 59(3)  | 39(2) | 7(2)   | 3(2)  | -2(2)  |
| C(00N) | 43(2) | 47(2)  | 39(2) | -5(2)  | 3(2)  | 4(2)   |
| C(00O) | 50(2) | 52(2)  | 53(2) | 7(2)   | 6(2)  | 0(2)   |
| C(00P) | 51(3) | 44(2)  | 47(2) | -7(2)  | 6(2)  | 1(2)   |
| C(00Q) | 53(3) | 75(3)  | 42(2) | 3(2)   | 1(2)  | -3(2)  |
| N(00R) | 50(2) | 67(2)  | 78(3) | 0(2)   | 1(2)  | -2(2)  |
| C(00S) | 54(3) | 65(3)  | 43(2) | 4(2)   | 3(2)  | 0(2)   |
| C(00T) | 41(2) | 50(2)  | 46(2) | -1(2)  | 6(2)  | -6(2)  |
| C(00U) | 54(3) | 51(2)  | 63(3) | -8(2)  | 5(2)  | -6(2)  |
| C(00V) | 51(3) | 48(2)  | 63(3) | -5(2)  | 7(2)  | 3(2)   |
| C(00W) | 51(3) | 71(3)  | 39(2) | 5(2)   | 1(2)  | -6(2)  |
| C(00X) | 56(3) | 48(2)  | 39(2) | 4(2)   | 6(2)  | -4(2)  |
| C(00Y) | 51(2) | 64(3)  | 47(2) | -9(2)  | 4(2)  | 6(2)   |
| C(00Z) | 42(2) | 64(3)  | 80(3) | -14(2) | 12(2) | 5(2)   |
| C(010) | 59(3) | 58(3)  | 56(3) | 14(2)  | -2(2) | 3(2)   |
| C(011) | 72(4) | 64(3)  | 60(3) | 0(2)   | 6(2)  | 12(3)  |
| C(012) | 64(3) | 61(3)  | 82(3) | -7(3)  | 14(3) | -19(2) |
| C(013) | 53(3) | 76(3)  | 50(2) | 9(2)   | 8(2)  | 2(2)   |
| C(014) | 77(3) | 67(3)  | 56(3) | -10(2) | 16(2) | 11(3)  |
| C(015) | 61(3) | 73(3)  | 41(2) | 4(2)   | -2(2) | -13(2) |
| C(016) | 58(3) | 65(3)  | 52(2) | 5(2)   | 7(2)  | -5(2)  |
| C(017) | 52(3) | 70(3)  | 67(3) | -22(2) | 18(2) | -6(2)  |
| C(018) | 70(3) | 61(3)  | 55(2) | 0(2)   | 5(2)  | -11(2) |
| C(019) | 74(3) | 59(3)  | 54(3) | -3(2)  | 19(2) | -5(2)  |
| C(01A) | 51(3) | 107(4) | 59(3) | -13(3) | 5(2)  | -18(3) |
| C(01B) | 75(3) | 69(3)  | 48(2) | -8(2)  | 13(2) | -1(2)  |
| C(01C) | 71(3) | 77(3)  | 60(3) | 1(2)   | 16(2) | 7(3)   |
| C(01D) | 80(3) | 62(3)  | 47(2) | -6(2)  | 0(2)  | -16(2) |
| C(01E) | 73(3) | 65(3)  | 48(2) | -14(2) | 9(2)  | 7(2)   |
| C(01F) | 97(4) | 53(3)  | 54(3) | -8(2)  | 13(3) | 18(3)  |
| C(01G) | 51(3) | 57(3)  | 64(3) | -6(2)  | -8(2) | 7(2)   |
| C(01H) | 75(3) | 73(3)  | 45(2) | 7(2)   | 10(2) | -1(3)  |
| C(01I) | 52(3) | 83(3)  | 61(3) | 19(2)  | 16(2) | 2(2)   |
| C(01J) | 54(3) | 78(3)  | 67(3) | -1(3)  | 11(2) | -6(2)  |
| C(01K) | 64(3) | 60(3)  | 52(2) | 6(2)   | 11(2) | -1(2)  |
| C(01L) | 91(4) | 60(3)  | 45(2) | -4(2)  | 19(2) | 11(3)  |
| C(01M) | 66(3) | 54(3)  | 52(2) | 1(2)   | 7(2)  | 4(2)   |
| C(01N) | 95(4) | 54(3)  | 88(4) | 10(3)  | 21(3) | -14(3) |

|        |         |        |       |        |       |        |
|--------|---------|--------|-------|--------|-------|--------|
| C(01O) | 46(3)   | 86(4)  | 79(3) | 7(3)   | 0(2)  | 3(2)   |
| C(01P) | 58(3)   | 97(4)  | 60(3) | 23(3)  | 3(2)  | 3(3)   |
| C(01Q) | 68(3)   | 71(3)  | 41(2) | 16(2)  | 5(2)  | -2(2)  |
| C(01R) | 97(4)   | 57(3)  | 71(3) | 13(2)  | 14(3) | 8(3)   |
| C(01S) | 51(3)   | 87(4)  | 51(3) | 9(2)   | 8(2)  | 1(2)   |
| C(01T) | 108(5)  | 71(3)  | 52(3) | 2(2)   | 14(3) | -1(3)  |
| C(01U) | 53(3)   | 128(5) | 70(3) | -11(4) | 9(3)  | -6(3)  |
| C(01V) | 103(4)  | 48(3)  | 67(3) | -5(2)  | 17(3) | 6(3)   |
| C(01W) | 57(3)   | 96(4)  | 71(3) | 10(3)  | 3(2)  | -12(3) |
| C(01X) | 65(3)   | 76(3)  | 58(3) | 13(2)  | 9(2)  | -9(3)  |
| C(01Y) | 69(4)   | 118(5) | 53(3) | 19(3)  | 3(3)  | 1(3)   |
| C(01Z) | 46(3)   | 96(4)  | 77(3) | 11(3)  | 16(2) | 3(3)   |
| C(020) | 74(4)   | 92(4)  | 77(3) | 2(3)   | -2(3) | -31(3) |
| C(021) | 89(4)   | 69(3)  | 72(3) | -8(3)  | 3(3)  | -21(3) |
| C(022) | 87(4)   | 59(3)  | 61(3) | -17(2) | 12(3) | -1(3)  |
| C(023) | 90(4)   | 127(6) | 64(3) | 15(4)  | 11(3) | 43(4)  |
| C(024) | 112(5)  | 87(4)  | 73(4) | 4(3)   | 7(3)  | 37(3)  |
| C(025) | 77(4)   | 82(4)  | 77(3) | -11(3) | 11(3) | -1(3)  |
| C(026) | 132(6)  | 94(4)  | 54(3) | 15(3)  | 16(4) | 39(4)  |
| C(027) | 66(4)   | 123(5) | 74(4) | -13(4) | 14(3) | 12(3)  |
| C(028) | 255(11) | 105(6) | 97(5) | 16(4)  | 38(6) | 79(7)  |

**Table S5. Hydrogen coordinates ( $\times 10^4$ ) and isotropic displacement parameters ( $\text{\AA}^2 \times 10^3$ ) for 3ea.**

|        | x     | y    | z    | U(eq) |
|--------|-------|------|------|-------|
| H(00N) | 2508  | 6060 | 5962 | 52    |
| H(00O) | 3819  | 8654 | 5314 | 62    |
| H(00V) | -73   | 9137 | 6274 | 65    |
| H(00X) | 4722  | 3505 | 8596 | 57    |
| H(00Y) | 2102  | 6850 | 7252 | 65    |
| H(00Z) | -1411 | 9237 | 6817 | 74    |
| H(01A) | 1623  | 9469 | 5504 | 70    |
| H(01B) | 2012  | 9399 | 4990 | 70    |
| H(011) | 2545  | 6867 | 8731 | 79    |
| H(012) | -1222 | 3445 | 6379 | 83    |
| H(013) | 4434  | 6988 | 6792 | 72    |
| H(014) | 5564  | 4633 | 5521 | 79    |
| H(015) | 7125  | 5485 | 8998 | 71    |
| H(018) | 3921  | 889  | 8401 | 75    |

|        |       |      |       |     |
|--------|-------|------|-------|-----|
| H(019) | 3181  | 5093 | 9746  | 73  |
| H(01D) | 8675  | 3982 | 9289  | 87  |
| H(01C) | 760   | 6901 | 7785  | 76  |
| H(01E) | 1591  | 4640 | 10139 | 82  |
| H(01F) | 5942  | 7354 | 9192  | 77  |
| H(01H) | 5206  | 6171 | 9440  | 77  |
| H(01G) | -644  | 6966 | 5309  | 71  |
| H(01J) | 3733  | 4627 | 7596  | 77  |
| H(01I) | 5618  | 8721 | 5635  | 77  |
| H(01K) | 6223  | 823  | 8942  | 79  |
| H(01Q) | 3341  | 646  | 9433  | 70  |
| H(01L) | 4261  | 6094 | 5017  | 77  |
| H(01M) | 2716  | 4318 | 6666  | 69  |
| H(01N) | -69   | 2005 | 6940  | 94  |
| H(01O) | 7684  | 6171 | 6571  | 85  |
| H(01P) | 6209  | 5892 | 7030  | 86  |
| H(01R) | 1912  | 2383 | 7068  | 90  |
| H(01T) | 4157  | 2286 | 7286  | 92  |
| H(01U) | 10026 | 2313 | 9062  | 100 |
| H(01V) | 2990  | 1981 | 5839  | 86  |
| H(01W) | 305   | 3097 | 8111  | 90  |
| H(01X) | 1774  | 178  | 9839  | 80  |
| H(01Y) | 7073  | 5191 | 8130  | 96  |
| H(01Z) | 7374  | 7597 | 5875  | 87  |
| H(020) | 587   | 630  | 7875  | 98  |
| H(021) | 2380  | -447 | 8001  | 93  |
| H(022) | 1680  | 3395 | 5331  | 82  |
| H(023) | 7483  | 2842 | 7810  | 112 |
| H(02A) | 5957  | 2211 | 5991  | 137 |
| H(02B) | 4922  | 1361 | 6176  | 137 |
| H(02C) | 5368  | 2916 | 6411  | 137 |
| H(025) | 7579  | -802 | 8710  | 95  |
| H(027) | 9482  | -56  | 8761  | 105 |
| H(02D) | 5521  | 52   | 7372  | 227 |
| H(02E) | 6841  | 383  | 7519  | 227 |
| H(02F) | 6231  | 834  | 7003  | 227 |

### X-Ray Crystallographic Data of 6aa

Crystallographic data for **6aa** have been deposited with the Cambridge Crystallographic Data Centre as deposition number 2219264. These data can be obtained free of charge via [www.ccdc.cam.ac.uk/data\\_request/cif](http://www.ccdc.cam.ac.uk/data_request/cif), or by emailing [data\\_request@ccdc.cam.ac.uk](mailto:data_request@ccdc.cam.ac.uk), or by contacting The Cambridge Crystallographic Data Centre, 12, Union Road, Cambridge CB2 1EZ, UK; fax: +44 1223 336033.

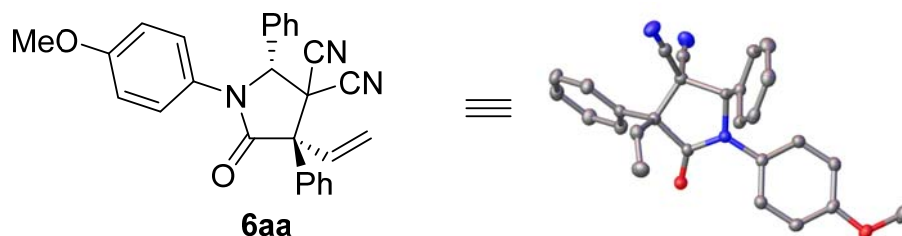

**Table S6. Crystal data and structure refinement for 6aa.**

|                                             |                                                               |
|---------------------------------------------|---------------------------------------------------------------|
| Identification code                         | <b>6aa</b>                                                    |
| Empirical formula                           | C <sub>27</sub> H <sub>21</sub> N <sub>3</sub> O <sub>2</sub> |
| Formula weight                              | 419.47                                                        |
| Temperature/K                               | 100.01(10)                                                    |
| Crystal system                              | monoclinic                                                    |
| Space group                                 | P2 <sub>1</sub>                                               |
| a/Å                                         | 8.30066(14)                                                   |
| b/Å                                         | 8.18447(13)                                                   |
| c/Å                                         | 16.4485(3)                                                    |
| α/°                                         | 90                                                            |
| β/°                                         | 104.3873(18)                                                  |
| γ/°                                         | 90                                                            |
| Volume/Å <sup>3</sup>                       | 1082.41(3)                                                    |
| Z                                           | 2                                                             |
| ρ <sub>calc</sub> /cm <sup>3</sup>          | 1.287                                                         |
| μ/mm <sup>-1</sup>                          | 0.659                                                         |
| F(000)                                      | 440.0                                                         |
| Crystal size/mm <sup>3</sup>                | 0.15 × 0.08 × 0.08                                            |
| Radiation                                   | Cu Kα (λ = 1.54184)                                           |
| 2θ range for data collection/°              | 5.546 to 153.332                                              |
| Index ranges                                | -10 ≤ h ≤ 9, -9 ≤ k ≤ 10, -20 ≤ l ≤ 20                        |
| Reflections collected                       | 20288                                                         |
| Independent reflections                     | 4370 [R <sub>int</sub> = 0.0414, R <sub>sigma</sub> = 0.0282] |
| Data/restraints/parameters                  | 4370/1/290                                                    |
| Goodness-of-fit on F <sup>2</sup>           | 1.090                                                         |
| Final R indexes [I ≥ 2σ (I)]                | R <sub>1</sub> = 0.0327, wR <sub>2</sub> = 0.0856             |
| Final R indexes [all data]                  | R <sub>1</sub> = 0.0338, wR <sub>2</sub> = 0.0864             |
| Largest diff. peak/hole / e Å <sup>-3</sup> | 0.13/-0.20                                                    |
| Flack parameter                             | -0.12(10)                                                     |

**Table S7. Fractional Atomic Coordinates ( $\times 10^4$ ) and Equivalent Isotropic Displacement Parameters ( $\text{\AA}^2 \times 10^3$ ) for 6aa.  $U_{eq}$  is defined as 1/3 of the trace of the orthogonalised UIJ tensor.**

| Atom | x          | y          | z          | $U_{eq}$ |
|------|------------|------------|------------|----------|
| O24  | 3969.0(18) | 2883.9(18) | 3739.0(9)  | 25.0(3)  |
| O31  | 1788.9(18) | 9428.3(19) | 5104.2(9)  | 27.4(3)  |
| N7   | 3787(2)    | 5154(2)    | 2898.4(10) | 20.2(3)  |
| N26  | 4298(2)    | 3689(3)    | 226.4(12)  | 33.5(4)  |
| N28  | 8232(2)    | 4574(2)    | 2407.5(14) | 34.4(5)  |
| C12  | 2690(2)    | 6369(2)    | 1469.8(12) | 21.1(4)  |
| C17  | 1045(2)    | 6068(3)    | 1483.6(13) | 22.7(4)  |
| C4   | 2292(2)    | 8473(3)    | 4530.5(12) | 22.3(4)  |
| C23  | 6817(3)    | 1115(3)    | 3328.9(13) | 24.9(4)  |
| C8   | 4074(2)    | 3542(2)    | 3087.9(12) | 19.7(4)  |
| C13  | 3023(3)    | 7359(3)    | 841.1(13)  | 25.2(4)  |
| C11  | 4158(2)    | 5698(2)    | 2122.0(12) | 20.2(4)  |
| C6   | 3828(3)    | 7883(3)    | 3507.2(13) | 24.3(4)  |
| C10  | 5012(2)    | 4123(3)    | 1852.9(12) | 21.2(4)  |
| C5   | 3359(3)    | 8985(3)    | 4052.1(13) | 25.2(4)  |
| C27  | 6836(2)    | 4345(3)    | 2156.9(13) | 24.4(4)  |
| C18  | 5783(2)    | 1335(2)    | 2532.0(13) | 21.6(4)  |
| C1   | 3240(2)    | 6298(2)    | 3435.5(12) | 20.2(4)  |
| C21  | 8331(3)    | -994(3)    | 2805.9(14) | 29.4(5)  |
| C3   | 1652(3)    | 6898(3)    | 4435.2(13) | 24.0(4)  |
| C9   | 4426(2)    | 2650(2)    | 2330.7(12) | 21.0(4)  |
| C19  | 6046(3)    | 383(3)     | 1871.7(13) | 26.3(4)  |
| C29  | 2801(3)    | 1915(3)    | 1818.4(14) | 24.8(4)  |
| C2   | 2105(2)    | 5805(3)    | 3888.4(12) | 22.3(4)  |
| C25  | 4616(2)    | 3899(3)    | 936.0(13)  | 24.5(4)  |
| C16  | -234(3)    | 6771(3)    | 879.9(14)  | 26.1(4)  |
| C14  | 1737(3)    | 8046(3)    | 234.5(14)  | 30.8(5)  |
| C22  | 8076(3)    | -53(3)     | 3462.4(14) | 28.0(5)  |
| C20  | 7314(3)    | -769(3)    | 2010.1(14) | 29.4(5)  |
| C15  | 106(3)     | 7771(3)    | 259.8(13)  | 30.2(5)  |
| C30  | 1431(3)    | 1701(3)    | 2069.9(16) | 33.7(5)  |
| C32  | 2566(3)    | 10983(3)   | 5278.0(16) | 33.8(5)  |

**Table S8. Anisotropic Displacement Parameters ( $\text{\AA}^2 \times 10^3$ ) for 6aa. The Anisotropic displacement factor exponent takes the form:  $-2\pi^2[h^2a^{*2}U_{11}+2hka^*b^*U_{12}+\dots]$ .**

| Atom | $U_{11}$ | $U_{22}$ | $U_{33}$ | $U_{23}$  | $U_{13}$ | $U_{12}$ |
|------|----------|----------|----------|-----------|----------|----------|
| O24  | 31.6(8)  | 20.6(7)  | 25.0(7)  | 2.8(6)    | 10.9(6)  | 3.8(6)   |
| O31  | 31.1(7)  | 26.3(8)  | 26.8(8)  | -4.8(6)   | 10.6(6)  | 2.1(6)   |
| N7   | 22.3(8)  | 18.6(8)  | 20.5(8)  | 1.2(6)    | 6.9(6)   | 0.6(6)   |
| N26  | 37.5(10) | 38.2(11) | 26.2(10) | 0.6(8)    | 10.4(8)  | 9.7(9)   |
| N28  | 25.7(9)  | 30.9(10) | 48.0(12) | 4.3(9)    | 11.8(8)  | -0.8(8)  |
| C12  | 22.3(9)  | 19.0(9)  | 22.3(9)  | -0.7(8)   | 6.3(8)   | 0.5(8)   |
| C17  | 24.0(10) | 21.3(10) | 24.1(10) | -2.5(8)   | 8.2(8)   | -0.2(8)  |
| C4   | 22.1(9)  | 24.6(10) | 19.1(9)  | -1.4(8)   | 3.0(7)   | 5.7(8)   |
| C23  | 25.4(10) | 23.9(11) | 25.1(10) | -1.4(8)   | 5.5(8)   | 1.7(8)   |
| C8   | 18.9(9)  | 18.0(9)  | 22.4(9)  | 1.1(8)    | 5.3(7)   | 0.9(7)   |
| C13  | 25.1(10) | 25.6(10) | 25.6(10) | 3.6(8)    | 7.6(8)   | 1.3(8)   |
| C11  | 20.5(9)  | 20.7(10) | 21.3(9)  | 0.4(8)    | 9.1(7)   | -1.5(7)  |
| C6   | 27.1(10) | 21.7(10) | 26.0(10) | 1.5(9)    | 10.3(8)  | 0.4(8)   |
| C10  | 19.7(9)  | 22.3(10) | 22.0(9)  | 1.7(8)    | 5.8(7)   | 1.4(8)   |
| C5   | 27.8(10) | 20.0(10) | 28.2(10) | -0.6(8)   | 8.0(8)   | -0.5(8)  |
| C27  | 24.3(10) | 22.6(10) | 27.8(10) | 3.4(8)    | 9.3(8)   | 1.8(8)   |
| C18  | 21.3(9)  | 17.7(9)  | 26.5(10) | 0.0(8)    | 7.4(8)   | -1.2(7)  |
| C1   | 21.1(9)  | 20.2(9)  | 18.8(9)  | 0.7(8)    | 3.9(7)   | 2.4(8)   |
| C21  | 27.2(10) | 24.7(11) | 35.7(12) | 1.4(9)    | 6.6(9)   | 5.0(9)   |
| C3   | 23.3(10) | 27.6(10) | 22.3(10) | 1.4(8)    | 7.8(8)   | 1.4(8)   |
| C9   | 20.1(9)  | 20.2(10) | 22.8(9)  | 1.1(8)    | 5.4(8)   | 0.4(8)   |
| C19  | 28.0(10) | 25.1(11) | 24.8(10) | -2.1(8)   | 4.5(8)   | 2.0(9)   |
| C29  | 23.5(10) | 22.6(10) | 27.2(10) | -0.7(8)   | 4.1(8)   | 0.5(8)   |
| C2   | 22.3(10) | 20.4(10) | 24.0(10) | 0.3(8)    | 5.3(8)   | -0.6(8)  |
| C25  | 25.2(9)  | 22.6(10) | 27.0(11) | 1.4(8)    | 9.0(8)   | 4.8(8)   |
| C16  | 21.3(10) | 25.3(11) | 30.5(11) | -6.3(9)   | 4.3(8)   | 3.2(8)   |
| C14  | 36.3(12) | 29.9(12) | 25.5(10) | 7.2(9)    | 6.5(9)   | 4.4(9)   |
| C22  | 25.7(10) | 28.1(11) | 28.2(11) | 1.1(9)    | 2.8(8)   | 4.0(9)   |
| C20  | 32.3(11) | 26.7(11) | 29.7(11) | -5.2(9)   | 9.0(9)   | 5.7(9)   |
| C15  | 29.5(11) | 29.4(11) | 27.6(11) | 0.2(9)    | -0.5(9)  | 7.1(9)   |
| C30  | 27.8(11) | 37.3(13) | 35.8(12) | -1.8(10)  | 7.7(9)   | -6.5(10) |
| C32  | 31.8(11) | 30.3(12) | 40.3(13) | -15.5(10) | 10.5(9)  | -1.6(10) |



**Table S9. Bond Lengths for 6aa.**

| Atom | Atom | Length/Å |  | Atom | Atom | Length/Å |
|------|------|----------|--|------|------|----------|
| O24  | C8   | 1.221(2) |  | C11  | C10  | 1.586(3) |
| O31  | C4   | 1.368(2) |  | C6   | C5   | 1.393(3) |
| O31  | C32  | 1.423(3) |  | C6   | C1   | 1.381(3) |
| N7   | C8   | 1.363(3) |  | C10  | C27  | 1.483(3) |
| N7   | C11  | 1.456(2) |  | C10  | C9   | 1.581(3) |
| N7   | C1   | 1.436(2) |  | C10  | C25  | 1.473(3) |
| N26  | C25  | 1.144(3) |  | C18  | C9   | 1.533(3) |
| N28  | C27  | 1.144(3) |  | C18  | C19  | 1.397(3) |
| C12  | C17  | 1.393(3) |  | C1   | C2   | 1.398(3) |
| C12  | C13  | 1.394(3) |  | C21  | C22  | 1.385(3) |
| C12  | C11  | 1.512(3) |  | C21  | C20  | 1.382(3) |
| C17  | C16  | 1.386(3) |  | C3   | C2   | 1.385(3) |
| C4   | C5   | 1.388(3) |  | C9   | C29  | 1.526(3) |
| C4   | C3   | 1.388(3) |  | C19  | C20  | 1.389(3) |
| C23  | C18  | 1.389(3) |  | C29  | C30  | 1.315(3) |
| C23  | C22  | 1.393(3) |  | C16  | C15  | 1.390(3) |
| C8   | C9   | 1.533(3) |  | C14  | C15  | 1.384(3) |
| C13  | C14  | 1.386(3) |  |      |      |          |

**Table S10. Bond Angles for 6aa.**

| Atom | Atom | Atom | Angle/°    |  | Atom | Atom | Atom | Angle/°    |
|------|------|------|------------|--|------|------|------|------------|
| C4   | O31  | C32  | 116.67(16) |  | C4   | C5   | C6   | 119.30(19) |
| C8   | N7   | C11  | 115.70(16) |  | N28  | C27  | C10  | 177.2(2)   |
| C8   | N7   | C1   | 123.67(16) |  | C23  | C18  | C9   | 122.94(18) |
| C1   | N7   | C11  | 120.54(16) |  | C23  | C18  | C19  | 118.79(18) |
| C17  | C12  | C13  | 119.38(19) |  | C19  | C18  | C9   | 118.16(17) |
| C17  | C12  | C11  | 122.98(18) |  | C6   | C1   | N7   | 120.41(17) |
| C13  | C12  | C11  | 117.63(17) |  | C6   | C1   | C2   | 119.76(18) |
| C16  | C17  | C12  | 119.62(19) |  | C2   | C1   | N7   | 119.84(18) |
| O31  | C4   | C5   | 124.45(19) |  | C20  | C21  | C22  | 119.3(2)   |
| O31  | C4   | C3   | 115.78(18) |  | C2   | C3   | C4   | 120.98(19) |
| C5   | C4   | C3   | 119.77(19) |  | C8   | C9   | C10  | 100.66(15) |
| C18  | C23  | C22  | 120.1(2)   |  | C18  | C9   | C8   | 115.91(16) |
| O24  | C8   | N7   | 125.51(18) |  | C18  | C9   | C10  | 110.06(15) |
| O24  | C8   | C9   | 124.91(18) |  | C29  | C9   | C8   | 108.36(15) |
| N7   | C8   | C9   | 109.44(16) |  | C29  | C9   | C10  | 111.41(16) |
| C14  | C13  | C12  | 120.7(2)   |  | C29  | C9   | C18  | 110.12(16) |
| N7   | C11  | C12  | 115.13(16) |  | C20  | C19  | C18  | 120.65(19) |
| N7   | C11  | C10  | 101.70(15) |  | C30  | C29  | C9   | 126.5(2)   |

|     |     |     |            |  |     |     |     |            |
|-----|-----|-----|------------|--|-----|-----|-----|------------|
| C12 | C11 | C10 | 115.74(16) |  | C3  | C2  | C1  | 119.18(19) |
| C1  | C6  | C5  | 120.91(18) |  | N26 | C25 | C10 | 178.4(2)   |
| C27 | C10 | C11 | 107.24(17) |  | C17 | C16 | C15 | 120.76(19) |
| C27 | C10 | C9  | 109.87(16) |  | C15 | C14 | C13 | 119.8(2)   |
| C9  | C10 | C11 | 105.50(14) |  | C21 | C22 | C23 | 120.9(2)   |
| C25 | C10 | C11 | 112.67(17) |  | C21 | C20 | C19 | 120.3(2)   |
| C25 | C10 | C27 | 108.05(16) |  | C14 | C15 | C16 | 119.8(2)   |
| C25 | C10 | C9  | 113.33(17) |  |     |     |     |            |

**Table S11. Hydrogen Atom Coordinates ( $\text{\AA}\times 10^4$ ) and Isotropic Displacement Parameters ( $\text{\AA}^2\times 10^3$ ) for 6aa.**

| Atom | x        | y        | z       | U(eq) |
|------|----------|----------|---------|-------|
| H17  | 801.66   | 5384.91  | 1904.54 | 27    |
| H23  | 6666.52  | 1762.63  | 3783.69 | 30    |
| H13  | 4142.46  | 7564.94  | 828.43  | 30    |
| H11  | 5017.84  | 6577.7   | 2265.01 | 24    |
| H6   | 4562.03  | 8227.51  | 3180.43 | 29    |
| H5   | 3765.82  | 10074.2  | 4095.81 | 30    |
| H21  | 9194.98  | -1785.2  | 2901.45 | 35    |
| H3   | 891.69   | 6564.25  | 4749.82 | 29    |
| H19  | 5351.31  | 525.31   | 1322.82 | 32    |
| H29  | 2775.84  | 1579.36  | 1262.52 | 30    |
| H2   | 1650.16  | 4734.15  | 3821.96 | 27    |
| H16  | -1355.33 | 6567.85  | 889.93  | 31    |
| H14  | 1975.32  | 8703.47  | -197.16 | 37    |
| H22  | 8768.54  | -205.87  | 4010.94 | 34    |
| H20  | 7483.12  | -1405.58 | 1555.45 | 35    |
| H15  | -779.31  | 8263.51  | -145.08 | 36    |
| H30A | 1393.16  | 2016.62  | 2620.6  | 40    |
| H30B | 479.62   | 1229.75  | 1701.05 | 40    |
| H32A | 2205.17  | 11692.3  | 4786.38 | 51    |
| H32B | 3776.79  | 10849.49 | 5408.36 | 51    |
| H32C | 2252.36  | 11477.68 | 5759.08 | 51    |

## X-Ray Crystallographic Data of 7

Crystallographic data for 7 have been deposited with the Cambridge Crystallographic Data Centre as deposition number 2221630. These data can be obtained free of charge via [www.ccdc.cam.ac.uk/data\\_request/cif](http://www.ccdc.cam.ac.uk/data_request/cif), or by emailing [data\\_request@ccdc.cam.ac.uk](mailto:data_request@ccdc.cam.ac.uk), or by contacting The Cambridge Crystallographic Data Centre, 12, Union Road, Cambridge CB2 1EZ, UK; fax: +44 1223 336033.

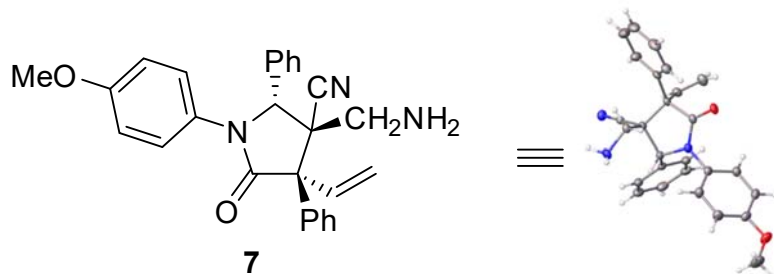

Table S12. Crystal data and structure refinement for 7.

|                                             |                                                               |
|---------------------------------------------|---------------------------------------------------------------|
| Identification code                         | 7                                                             |
| Empirical formula                           | C <sub>27</sub> H <sub>25</sub> N <sub>3</sub> O <sub>2</sub> |
| Formula weight                              | 423.50                                                        |
| Temperature/K                               | 173.00                                                        |
| Crystal system                              | orthorhombic                                                  |
| Space group                                 | P212121                                                       |
| a/Å                                         | 9.76060(10)                                                   |
| b/Å                                         | 10.33100(10)                                                  |
| c/Å                                         | 21.9651(3)                                                    |
| α/°                                         | 90                                                            |
| β/°                                         | 90                                                            |
| γ/°                                         | 90                                                            |
| Volume/Å <sup>3</sup>                       | 2214.89(4)                                                    |
| Z                                           | 4                                                             |
| ρ <sub>calc</sub> /cm <sup>3</sup>          | 1.270                                                         |
| μ/mm <sup>-1</sup>                          | 0.645                                                         |
| F(000)                                      | 896.0                                                         |
| Crystal size/mm <sup>3</sup>                | 0.13 × 0.12 × 0.1                                             |
| Radiation                                   | Cu Kα (λ = 1.54184)                                           |
| 2θ range for data collection/°              | 8.05 to 151.714                                               |
| Index ranges                                | -8 ≤ h ≤ 12, -12 ≤ k ≤ 12, -26 ≤ l ≤ 27                       |
| Reflections collected                       | 15467                                                         |
| Independent reflections                     | 4549 [Rint = 0.0316, Rsigma = 0.0287]                         |
| Data/restraints/parameters                  | 4549/0/306                                                    |
| Goodness-of-fit on F <sup>2</sup>           | 1.040                                                         |
| Final R indexes [I ≥ 2σ (I)]                | R1 = 0.0309, wR2 = 0.0739                                     |
| Final R indexes [all data]                  | R1 = 0.0344, wR2 = 0.0755                                     |
| Largest diff. peak/hole / e Å <sup>-3</sup> | 0.17/-0.16                                                    |
| Flack parameter                             | 0.02(10)                                                      |

**Table S13. Fractional Atomic Coordinates ( $\times 10^4$ ) and Equivalent Isotropic Displacement Parameters ( $\text{\AA}^2 \times 10^3$ ) for 7.  $U_{eq}$  is defined as 1/3 of the trace of the orthogonalised  $U_{ij}$  tensor.**

| Atom  | x           | y          | z         | $U_{eq}$ |
|-------|-------------|------------|-----------|----------|
| O(2)  | 4712.9(12)  | 6137.7(12) | 2596.1(6) | 28.3(3)  |
| O(1)  | 3637.7(16)  | 4722.7(16) | 5375.2(6) | 39.6(3)  |
| N(1)  | 6394.0(14)  | 5165.9(14) | 3162.1(6) | 21.7(3)  |
| N(3)  | 8219.3(16)  | 2237.2(15) | 2468.5(7) | 27.3(3)  |
| N(2)  | 10468.4(15) | 4802.6(15) | 2012.9(7) | 26.8(3)  |
| C(16) | 9372.2(16)  | 4741.6(15) | 2194.8(7) | 19.7(3)  |
| C(18) | 5867.0(16)  | 5702.4(15) | 2648.4(8) | 20.6(3)  |
| C(5)  | 5648.0(16)  | 5027.4(17) | 3718.2(8) | 22.7(3)  |
| C(8)  | 7781.9(15)  | 4649.2(16) | 3103.3(7) | 19.6(3)  |
| C(15) | 7942.9(15)  | 4604.2(15) | 2394.7(7) | 18.1(3)  |
| C(19) | 6994.2(15)  | 5722.1(15) | 2159.7(7) | 19.1(3)  |
| C(17) | 7432.6(16)  | 3255.0(15) | 2174.2(8) | 21.3(3)  |
| C(9)  | 8871.6(16)  | 5383.6(16) | 3454.1(7) | 21.2(3)  |
| C(6)  | 5171.1(18)  | 6115.1(17) | 4028.7(8) | 25.4(3)  |
| C(14) | 8728.0(18)  | 6669.2(17) | 3637.0(8) | 24.6(3)  |
| C(7)  | 4492.8(18)  | 5976.0(18) | 4575.6(9) | 27.9(4)  |
| C(20) | 7675.4(17)  | 7056.1(16) | 2208.1(8) | 23.5(3)  |
| C(22) | 6525.0(17)  | 5481.4(16) | 1506.4(8) | 22.6(3)  |
| C(10) | 10085.9(17) | 4729.8(18) | 3591.7(7) | 25.7(3)  |
| C(2)  | 4281.4(18)  | 4748(2)    | 4823.4(8) | 28.4(4)  |
| C(13) | 9788(2)     | 7289.6(18) | 3947.3(8) | 29.4(4)  |
| C(4)  | 5409.3(19)  | 3806.7(17) | 3957.1(9) | 28.2(4)  |
| C(23) | 5212.8(19)  | 5049.5(17) | 1355.0(9) | 29.6(4)  |
| C(27) | 7481(2)     | 5631(2)    | 1041.7(9) | 31.6(4)  |
| C(11) | 11145.4(18) | 5351(2)    | 3894.7(8) | 31.7(4)  |
| C(12) | 10993(2)    | 6634(2)    | 4075.1(8) | 32.8(4)  |

|       |         |            |            |         |
|-------|---------|------------|------------|---------|
| C(21) | 7018(2) | 8152.8(18) | 2229.6(10) | 32.6(4) |
| C(3)  | 4726(2) | 3656.9(18) | 4508.9(9)  | 30.8(4) |
| C(25) | 5856(2) | 4909(2)    | 296.0(9)   | 39.8(5) |
| C(24) | 4888(2) | 4771(2)    | 748.5(10)  | 39.1(5) |
| C(26) | 7159(2) | 5335(2)    | 441.0(9)   | 39.6(5) |
| C(1)  | 3454(3) | 3499(3)    | 5661.6(11) | 50.4(6) |

**Table S14. Anisotropic Displacement Parameters ( $\text{\AA}^2 \times 10^3$ ) for 7. The Anisotropic displacement factor exponent takes the form:  $-2\pi^2[h^2a^{*2}U_{11}+2hka^*b^*U_{12}+\dots]$ .**

| Atom  | U11     | U22     | U33     | U23     | U13     | U12     |
|-------|---------|---------|---------|---------|---------|---------|
| O(2)  | 18.4(5) | 29.1(6) | 37.4(7) | 0.1(5)  | 0.2(5)  | 6.3(5)  |
| O(1)  | 41.3(7) | 47.2(8) | 30.3(6) | -0.9(6) | 13.5(6) | -6.1(7) |
| N(1)  | 17.4(6) | 23.2(6) | 24.5(6) | 0.1(5)  | 1.4(5)  | 1.4(5)  |
| N(3)  | 29.0(7) | 18.7(7) | 34.1(8) | 0.2(6)  | -2.6(7) | 3.6(6)  |
| N(2)  | 20.6(7) | 29.1(7) | 30.7(7) | -3.2(6) | 1.5(6)  | -2.5(6) |
| C(16) | 21.0(8) | 18.6(7) | 19.7(7) | -1.4(6) | -4.3(6) | 0.4(6)  |
| C(18) | 18.6(7) | 16.7(7) | 26.6(8) | -1.9(6) | -1.4(6) | 0.4(5)  |
| C(5)  | 17.2(7) | 26.7(8) | 24.3(7) | -0.9(6) | 0.7(6)  | -0.2(6) |
| C(8)  | 17.5(7) | 21.0(7) | 20.4(7) | 1.2(6)  | 0.7(6)  | 1.4(6)  |
| C(15) | 15.7(6) | 18.2(7) | 20.4(7) | -0.2(6) | -1.8(5) | 1.0(5)  |
| C(19) | 15.3(7) | 18.3(7) | 23.6(8) | 0.2(6)  | -1.6(6) | 1.3(6)  |
| C(17) | 17.8(7) | 18.3(7) | 27.7(8) | -2.3(6) | -2.7(6) | -0.4(6) |
| C(9)  | 19.8(7) | 27.6(8) | 16.2(6) | 0.5(6)  | 1.6(6)  | -0.8(6) |
| C(6)  | 23.2(8) | 24.1(8) | 28.7(8) | -1.1(7) | 1.4(7)  | 0.9(6)  |
| C(14) | 26.5(8) | 27.2(8) | 20.2(7) | 0.3(6)  | -0.1(6) | 1.0(7)  |
| C(7)  | 24.6(8) | 30.9(9) | 28.2(9) | -6.0(7) | 2.6(7)  | 2.0(7)  |
| C(20) | 20.9(7) | 22.0(8) | 27.7(8) | 2.1(6)  | -3.7(6) | -2.4(6) |
| C(22) | 23.6(8) | 19.6(7) | 24.6(8) | 0.9(6)  | -6.6(6) | 3.6(6)  |
| C(10) | 23.6(8) | 33.4(8) | 20.1(7) | 0.3(7)  | -0.2(6) | 3.7(7)  |

|       |          |          |          |         |          |           |
|-------|----------|----------|----------|---------|----------|-----------|
| C(2)  | 21.2(7)  | 39.3(10) | 24.8(8)  | -1.3(7) | 3.3(6)   | -3.9(7)   |
| C(13) | 38.2(9)  | 31.1(9)  | 18.8(7)  | -1.2(7) | 0.3(7)   | -7.6(7)   |
| C(4)  | 26.0(8)  | 25.2(8)  | 33.4(9)  | -2.2(7) | 5.0(7)   | -0.3(7)   |
| C(23) | 25.2(8)  | 29.2(9)  | 34.3(9)  | -1.6(7) | -6.6(7)  | -0.6(7)   |
| C(27) | 28.3(9)  | 40.5(10) | 26.1(9)  | 3.4(7)  | -3.1(7)  | 0.0(7)    |
| C(11) | 22.7(8)  | 48.8(11) | 23.7(8)  | 1.9(8)  | -3.7(7)  | 2.7(8)    |
| C(12) | 30.3(9)  | 47.5(11) | 20.7(8)  | 0.3(7)  | -4.1(7)  | -11.4(8)  |
| C(21) | 31.0(9)  | 21.4(8)  | 45.6(11) | -0.1(8) | -1.9(8)  | -2.0(7)   |
| C(3)  | 29.4(9)  | 28.5(9)  | 34.6(10) | 4.5(7)  | 4.1(8)   | -4.4(7)   |
| C(25) | 52.4(12) | 39.6(11) | 27.6(9)  | -4.8(8) | -15.2(9) | 6.5(9)    |
| C(24) | 38.4(10) | 34.6(10) | 44.3(11) | -4.9(9) | -19.7(9) | -1.3(9)   |
| C(26) | 44.4(11) | 48.7(12) | 25.6(9)  | 0.5(9)  | -1.2(8)  | 5.1(10)   |
| C(1)  | 59.3(15) | 55.1(14) | 36.9(11) | 7.2(10) | 17.2(11) | -13.9(12) |

**Table S15. Bond Lengths for 7.**

| Atom  | Atom  | Length/Å |  | Atom  | Atom  | Length/Å |
|-------|-------|----------|--|-------|-------|----------|
| O(2)  | C(18) | 1.218(2) |  | C(9)  | C(14) | 1.395(2) |
| O(1)  | C(2)  | 1.366(2) |  | C(9)  | C(10) | 1.397(2) |
| O(1)  | C(1)  | 1.424(3) |  | C(6)  | C(7)  | 1.379(3) |
| N(1)  | C(18) | 1.358(2) |  | C(14) | C(13) | 1.395(3) |
| N(1)  | C(5)  | 1.429(2) |  | C(7)  | C(2)  | 1.396(3) |
| N(1)  | C(8)  | 1.462(2) |  | C(20) | C(21) | 1.303(3) |
| N(3)  | C(17) | 1.454(2) |  | C(22) | C(23) | 1.397(2) |
| N(2)  | C(16) | 1.144(2) |  | C(22) | C(27) | 1.391(3) |
| C(16) | C(15) | 1.469(2) |  | C(10) | C(11) | 1.387(3) |
| C(18) | C(19) | 1.537(2) |  | C(2)  | C(3)  | 1.391(3) |
| C(5)  | C(6)  | 1.395(2) |  | C(13) | C(12) | 1.386(3) |
| C(5)  | C(4)  | 1.386(2) |  | C(4)  | C(3)  | 1.392(3) |
| C(8)  | C(15) | 1.565(2) |  | C(23) | C(24) | 1.399(3) |

|       |       |          |  |       |       |          |
|-------|-------|----------|--|-------|-------|----------|
| C(8)  | C(9)  | 1.517(2) |  | C(27) | C(26) | 1.390(3) |
| C(15) | C(19) | 1.568(2) |  | C(11) | C(12) | 1.391(3) |
| C(15) | C(17) | 1.557(2) |  | C(25) | C(24) | 1.378(3) |
| C(19) | C(20) | 1.534(2) |  | C(25) | C(26) | 1.384(3) |
| C(19) | C(22) | 1.527(2) |  |       |       |          |

**Table S16. Bond Angles for 7.**

| Atom  | Atom  | Atom  | Angle/°    |  | Atom  | Atom  | Atom  | Angle/°    |
|-------|-------|-------|------------|--|-------|-------|-------|------------|
| C(2)  | O(1)  | C(1)  | 117.85(17) |  | N(3)  | C(17) | C(15) | 109.89(13) |
| C(18) | N(1)  | C(5)  | 123.91(14) |  | C(14) | C(9)  | C(8)  | 123.52(15) |
| C(18) | N(1)  | C(8)  | 115.24(13) |  | C(14) | C(9)  | C(10) | 118.90(16) |
| C(5)  | N(1)  | C(8)  | 120.74(13) |  | C(10) | C(9)  | C(8)  | 117.57(15) |
| N(2)  | C(16) | C(15) | 176.16(17) |  | C(7)  | C(6)  | C(5)  | 120.15(16) |
| O(2)  | C(18) | N(1)  | 125.38(16) |  | C(13) | C(14) | C(9)  | 120.26(16) |
| O(2)  | C(18) | C(19) | 126.24(15) |  | C(6)  | C(7)  | C(2)  | 120.35(16) |
| N(1)  | C(18) | C(19) | 108.33(13) |  | C(21) | C(20) | C(19) | 124.78(16) |
| C(6)  | C(5)  | N(1)  | 120.49(15) |  | C(23) | C(22) | C(19) | 123.44(16) |
| C(4)  | C(5)  | N(1)  | 120.03(15) |  | C(27) | C(22) | C(19) | 118.06(15) |
| C(4)  | C(5)  | C(6)  | 119.48(15) |  | C(27) | C(22) | C(23) | 118.40(16) |
| N(1)  | C(8)  | C(15) | 101.06(12) |  | C(11) | C(10) | C(9)  | 120.81(17) |
| N(1)  | C(8)  | C(9)  | 114.98(13) |  | O(1)  | C(2)  | C(7)  | 115.56(17) |
| C(9)  | C(8)  | C(15) | 116.72(13) |  | O(1)  | C(2)  | C(3)  | 124.66(18) |
| C(16) | C(15) | C(8)  | 112.92(12) |  | C(3)  | C(2)  | C(7)  | 119.78(16) |
| C(16) | C(15) | C(19) | 113.04(13) |  | C(12) | C(13) | C(14) | 120.26(17) |
| C(16) | C(15) | C(17) | 107.29(13) |  | C(5)  | C(4)  | C(3)  | 120.76(17) |
| C(8)  | C(15) | C(19) | 104.25(12) |  | C(22) | C(23) | C(24) | 120.01(18) |
| C(17) | C(15) | C(8)  | 107.68(13) |  | C(26) | C(27) | C(22) | 121.38(18) |
| C(17) | C(15) | C(19) | 111.60(12) |  | C(10) | C(11) | C(12) | 119.86(17) |
| C(18) | C(19) | C(15) | 100.55(12) |  | C(13) | C(12) | C(11) | 119.90(17) |

|       |       |       |            |  |       |       |       |            |
|-------|-------|-------|------------|--|-------|-------|-------|------------|
| C(20) | C(19) | C(18) | 105.89(13) |  | C(2)  | C(3)  | C(4)  | 119.45(17) |
| C(20) | C(19) | C(15) | 112.52(13) |  | C(24) | C(25) | C(26) | 119.80(18) |
| C(22) | C(19) | C(18) | 116.07(13) |  | C(25) | C(24) | C(23) | 120.67(18) |
| C(22) | C(19) | C(15) | 111.51(13) |  | C(25) | C(26) | C(27) | 119.7(2)   |
| C(22) | C(19) | C(20) | 109.97(13) |  |       |       |       |            |

**Table S17. Torsion Angles for 7.**

| A     | B     | C     | D     | Angle/°     | A     | B     | C     | D     | Angle/°     |
|-------|-------|-------|-------|-------------|-------|-------|-------|-------|-------------|
| O(2)  | C(18) | C(19) | C(15) | -159.11(16) | C(8)  | C(9)  | C(14) | C(13) | -178.62(15) |
| O(2)  | C(18) | C(19) | C(20) | 83.62(19)   | C(8)  | C(9)  | C(10) | C(11) | 177.99(15)  |
| O(2)  | C(18) | C(19) | C(22) | -38.7(2)    | C(15) | C(8)  | C(9)  | C(14) | 95.90(18)   |
| O(1)  | C(2)  | C(3)  | C(4)  | -178.02(18) | C(15) | C(8)  | C(9)  | C(10) | -83.29(18)  |
| N(1)  | C(18) | C(19) | C(15) | 23.58(16)   | C(15) | C(19) | C(20) | C(21) | -157.52(19) |
| N(1)  | C(18) | C(19) | C(20) | -93.69(15)  | C(15) | C(19) | C(22) | C(23) | 103.61(18)  |
| N(1)  | C(18) | C(19) | C(22) | 143.99(14)  | C(15) | C(19) | C(22) | C(27) | -72.61(19)  |
| N(1)  | C(5)  | C(6)  | C(7)  | -177.78(16) | C(19) | C(15) | C(17) | N(3)  | -172.11(13) |
| N(1)  | C(5)  | C(4)  | C(3)  | 177.75(17)  | C(19) | C(22) | C(23) | C(24) | -175.85(16) |
| N(1)  | C(8)  | C(15) | C(16) | 151.76(13)  | C(19) | C(22) | C(27) | C(26) | 175.12(18)  |
| N(1)  | C(8)  | C(15) | C(19) | 28.68(15)   | C(17) | C(15) | C(19) | C(18) | 84.28(15)   |
| N(1)  | C(8)  | C(15) | C(17) | -89.98(14)  | C(17) | C(15) | C(19) | C(20) | -163.46(13) |
| N(1)  | C(8)  | C(9)  | C(14) | -22.2(2)    | C(17) | C(15) | C(19) | C(22) | -39.35(18)  |
| N(1)  | C(8)  | C(9)  | C(10) | 158.58(14)  | C(9)  | C(8)  | C(15) | C(16) | 26.30(19)   |
| C(16) | C(15) | C(19) | C(18) | -154.68(13) | C(9)  | C(8)  | C(15) | C(19) | -96.78(15)  |
| C(16) | C(15) | C(19) | C(20) | -42.42(18)  | C(9)  | C(8)  | C(15) | C(17) | 144.56(14)  |
| C(16) | C(15) | C(19) | C(22) | 81.70(16)   | C(9)  | C(14) | C(13) | C(12) | 0.1(3)      |
| C(16) | C(15) | C(17) | N(3)  | 63.55(17)   | C(9)  | C(10) | C(11) | C(12) | 1.2(3)      |
| C(18) | N(1)  | C(5)  | C(6)  | -62.3(2)    | C(6)  | C(5)  | C(4)  | C(3)  | -1.4(3)     |
| C(18) | N(1)  | C(5)  | C(4)  | 118.52(19)  | C(6)  | C(7)  | C(2)  | O(1)  | 178.01(17)  |
| C(18) | N(1)  | C(8)  | C(15) | -14.90(17)  | C(6)  | C(7)  | C(2)  | C(3)  | -1.7(3)     |



|       |       |       |       |             |       |       |       |       |             |
|-------|-------|-------|-------|-------------|-------|-------|-------|-------|-------------|
| C(18) | N(1)  | C(8)  | C(9)  | 111.72(16)  | C(14) | C(9)  | C(10) | C(11) | -1.2(2)     |
| C(18) | C(19) | C(20) | C(21) | -48.6(2)    | C(14) | C(13) | C(12) | C(11) | -0.2(3)     |
| C(18) | C(19) | C(22) | C(23) | -10.7(2)    | C(7)  | C(2)  | C(3)  | C(4)  | 1.6(3)      |
| C(18) | C(19) | C(22) | C(27) | 173.07(15)  | C(20) | C(19) | C(22) | C(23) | -130.85(17) |
| C(5)  | N(1)  | C(18) | O(2)  | 0.6(3)      | C(20) | C(19) | C(22) | C(27) | 52.9(2)     |
| C(5)  | N(1)  | C(18) | C(19) | 177.94(14)  | C(22) | C(19) | C(20) | C(21) | 77.5(2)     |
| C(5)  | N(1)  | C(8)  | C(15) | 161.53(14)  | C(22) | C(23) | C(24) | C(25) | 0.5(3)      |
| C(5)  | N(1)  | C(8)  | C(9)  | -71.85(19)  | C(22) | C(27) | C(26) | C(25) | 1.4(3)      |
| C(5)  | C(6)  | C(7)  | C(2)  | 0.2(3)      | C(10) | C(9)  | C(14) | C(13) | 0.6(2)      |
| C(5)  | C(4)  | C(3)  | C(2)  | -0.1(3)     | C(10) | C(11) | C(12) | C(13) | -0.5(3)     |
| C(8)  | N(1)  | C(18) | O(2)  | 176.90(15)  | C(4)  | C(5)  | C(6)  | C(7)  | 1.4(3)      |
| C(8)  | N(1)  | C(18) | C(19) | -5.76(18)   | C(23) | C(22) | C(27) | C(26) | -1.3(3)     |
| C(8)  | N(1)  | C(5)  | C(6)  | 121.54(17)  | C(27) | C(22) | C(23) | C(24) | 0.4(3)      |
| C(8)  | N(1)  | C(5)  | C(4)  | -57.6(2)    | C(24) | C(25) | C(26) | C(27) | -0.4(3)     |
| C(8)  | C(15) | C(19) | C(18) | -31.67(14)  | C(26) | C(25) | C(24) | C(23) | -0.5(3)     |
| C(8)  | C(15) | C(19) | C(20) | 80.59(15)   | C(1)  | O(1)  | C(2)  | C(7)  | -177.1(2)   |
| C(8)  | C(15) | C(19) | C(22) | -155.30(13) | C(1)  | O(1)  | C(2)  | C(3)  | 2.6(3)      |
| C(8)  | C(15) | C(17) | N(3)  | -58.27(17)  |       |       |       |       |             |

**Table S18. Hydrogen Atom Coordinates ( $\text{\AA}\times 10^4$ ) and Isotropic Displacement Parameters ( $\text{\AA}^2\times 10^3$ ) for 7.**

| Atom   | x       | y       | z       | U(eq) |
|--------|---------|---------|---------|-------|
| H(8)   | 7773.4  | 3737.39 | 3256.05 | 24    |
| H(17A) | 6449.27 | 3152.81 | 2273.57 | 26    |
| H(17B) | 7537.78 | 3189.13 | 1726.95 | 26    |
| H(6)   | 5313.87 | 6953.87 | 3863.16 | 30    |
| H(14)  | 7905.19 | 7124.03 | 3549.89 | 30    |
| H(7)   | 4167.78 | 6719.92 | 4784.86 | 33    |
| H(20)  | 8647.59 | 7084.79 | 2223.54 | 28    |

|        |          |          |          |        |
|--------|----------|----------|----------|--------|
| H(10)  | 10187.34 | 3848.75  | 3476.32  | 31     |
| H(13)  | 9683.01  | 8164.88  | 4071.47  | 35     |
| H(4)   | 5715.44  | 3063.46  | 3741.77  | 34     |
| H(23)  | 4540.46  | 4944.62  | 1663.87  | 35     |
| H(27)  | 8371.54  | 5940.76  | 1136.89  | 38     |
| H(11)  | 11973.21 | 4902.2   | 3978.81  | 38     |
| H(12)  | 11713.56 | 7060.52  | 4285.55  | 39     |
| H(3)   | 4564.61  | 2816.78  | 4669.45  | 37     |
| H(25)  | 5628.4   | 4711.08  | -114.12  | 48     |
| H(24)  | 3991.6   | 4484.35  | 647.48   | 47     |
| H(26)  | 7831.85  | 5425.76  | 131.35   | 47     |
| H(1A)  | 2822.85  | 2970.73  | 5419.05  | 76     |
| H(1B)  | 3072.42  | 3625.6   | 6069.94  | 76     |
| H(1C)  | 4339.54  | 3056.85  | 5692.82  | 76     |
| H(21A) | 7500(20) | 8980(20) | 2256(10) | 25(5)  |
| H(3A)  | 7670(30) | 1560(30) | 2543(13) | 46(7)  |
| H(3B)  | 8940(30) | 2000(20) | 2221(11) | 38(6)  |
| H(21B) | 6050(40) | 8120(30) | 2222(15) | 73(10) |
